# Supplementary material
Source: PubMed Central journal article supplement (PMC5730476)
Supplement: NIHMS916645-supplement-Supp1.pdf [file NIHMS916645-supplement-Supp1.pdf]

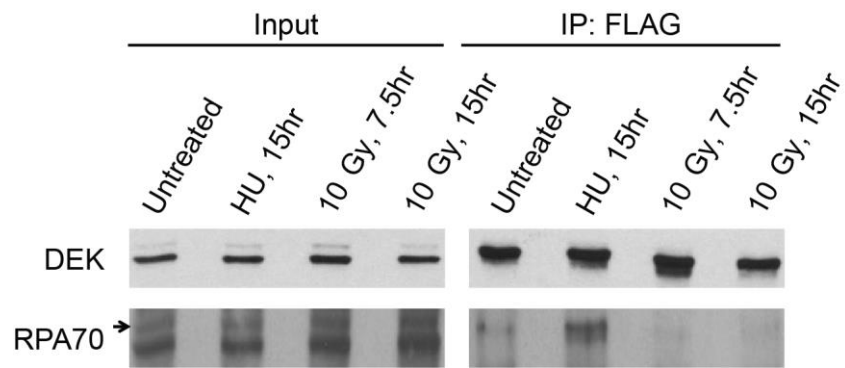

**Figure S1:** RPA most strongly interacts with DEK following HU-treatment. HF-DEK transduced cells were treated with either HU or IR for the indicated time points and harvested using the TAP-protocol. After performing washes on the FLAG affinity beads, they were boiled in 2x Laemmli buffer, analyzed by Western blot. The interaction with RPA was strongest in the HU-treated samples and weakest in those treated with IR.

**1 MSASAPAAEG EGTPTQ**PASE KEPEMPGPRE **ES**EEEEDEDD EEEEEEEKEK  
**51 SLIVEGKREK** KKVERL**TM**QV SSLQREPFTI A**Q**GKGQKLCE IERIHFFLSK  
**101 KKTDEL**RNLH KLLYN**R**PGTV SSLKKN**V**GQF SGFPFEKGSV QYKKKEEMLK  
**151 KFRN**AMLKSI CEVLDLERSG V**N**SELVKRIL N**FL**MHPKPSG KPLPKSKKTC  
**201 SKGSKK**ERNS **SG**MARKAKRT KCPEILSDES S**S**DEDEKKNK **EES**S**D**DEDKE  
**251 SEEE**PPKTA KREKPKQKAT SKSKKSVKSA NVKKADSSTT KKNQ**N**SSK**KE**  
**301 SE**SEDSSDE PLIKKLK**PP** TDEELKETIK KLLASANLEE **VT**MKQICKKV  
**351 YENY**PTYDLT ERKDFIKTTV **KELIS**      Sequence Coverage: 77%

**Figure S2:** DEK peptide and phosphorylation sequences identified in HF-DEK TAP-MS. The sequence match score to human DEK was 7289. Matching peptides are shown in bold red, and identified phosphorylated sequences are shown in bold blue (<5% FDR and Significance Threshold at p<0.005).

```

1 MSASAPAAEG EGTPTQPASE KEPEMPGPRE ESEEEEDEDD EEEEEEEKEK
51 SLIVEGKREK KKVERLTMQV SSLQREPFTI AQGKGQKLCE IERIHFFLSK
101 KKTDELRNLH KLLYNRPQTV SSLKKNVGQF SGFPFEKGSV QYKKKEMLK
151 KFRNAMLKSI CEVLDLERSG VNSELVKRIL NFLMHPKPSG KPLPKSKKTC
201 SKGSKKERNS SGMARKAKRT KCPEILSDES SDEDEKKNK EESDDEDKE
251 SEEEPPKTA KREKPKQKAT SKSKKSVKSA NVKKADSSTT KKNQNSSKKE
301 SESEDSSDE PLIKKLKKPP TDEELKETIK KLLASANLEE VTMKQICKKV
351 YENYPTYDLT ERKDFIKTTV KELIS      Sequence Coverage: 67%

```

**Figure S3:** DEK peptide and phosphorylation sequences identified in the untreated HF-DEK TAP-MS sample. The sequence match score to human DEK was 2503. Matching peptides are shown in bold red, and identified phosphorylated sequences are shown in bold blue (<5% FDR and Significance Threshold at  $p < 0.005$ ).

```

1 MSASAPAAEG EGTPTQPASE KEPEMPGPRE ESEEEEEDEDD EEEEEEEKEK
51 SLIVEGKREK KKVERLTMQV SSLQREPFTI AQKGQKLCE IERIHFFLSK
101 KKTDELRNLH KLLYNRPGTV SSLKKNVGQF SGFPFEKGSV QYKKKEEMLK
151 KFRNAMLKSI CEVLDLERSG VNSELVKRIL NFLMHPKPSG KPLPKSKKTC
201 SKGSKKERNS SGMARKAKRT KCPEILSDES SSDEDEKKNK EESDDEDKE
251 SEEEPPKTA KREKPKQKAT SKSKKSVKSA NVKKADSSTT KKNQNSSKKE
301 SESEDSSDE PLIKKLKKPP TDEELKETIK KLLASANLEE VTMKQICKKV
351 YENYPTYDLT ERKDFIKTTV KELIS      Sequence Coverage: 57%

```

**Figure S4:** DEK peptide and phosphorylation sequences identified in the HU-treated HF-DEK TAP-MS sample. The sequence match score to human DEK was 2197. Matching peptides are shown in bold red, and identified phosphorylated sequences are shown in bold blue (<5% FDR and Significance Threshold at  $p < 0.005$ ).
