# Supplementary material
Source: PubMed Central journal article supplement (PMC5730476)
Supplement: NIHMS916645-supplement-Supp2.pdf [file NIHMS916645-supplement-Supp2.pdf]

MIEG TAP-MS Protein List

| Unique Peptides | Total Peptides | Reference           | AVG Score | Gene Symbol | MWT (kDa) |
|-----------------|----------------|---------------------|-----------|-------------|-----------|
| 8               | 11             | P62736_ACTA_HUMAN   | 2.9771    | ACTA2       | 41.98     |
| 8               | 10             | P35659_DEK_HUMAN    | 3.1393    | DEK         | 42.65     |
| 7               | 8              | P35579_MYH9_HUMAN   | 3.1899    | MYH9        | 226.39    |
| 6               | 7              | P11021_GRP78_HUMAN  | 2.4585    | HSPA5       | 72.29     |
| 5               | 5              | Q71U36_TBA1A_HUMAN  | 3.8968    | TUBA1A      | 50.1      |
| 4               | 4              | P07355_ANXA2_HUMAN  | 3.2657    | ANXA2       | 38.58     |
| 4               | 4              | IGH1M_MOUSE         | 2.8895    | Ighg1       | 43.36     |
| 4               | 4              | O15294_OGT1_HUMAN   | 2.3328    | OGT         | 116.85    |
| 3               | 85             | SAV1_STRVL          | 4.736     |             | 18.85     |
| 3               | 13             | P07477_TRY1_HUMAN   | 4.0355    | PRSS1       | 26.54     |
| 3               | 7              | Q9H9A7_RMI1_HUMAN   | 4.322     | RMI1        | 70.1      |
| 3               | 4              | Q15393_SF3B3_HUMAN  | 3.3404    | SF3B3       | 135.49    |
| 3               | 3              | Q15208_STK38_HUMAN  | 2.6725    | STK38       | 54.16     |
| 3               | 3              | P38646_GRP75_HUMAN  | 2.3932    | HSPA9       | 73.63     |
| 2               | 3              | Q99873_ANM1_HUMAN   | 2.7826    | PRMT1       | 41.49     |
| 2               | 2              | P60709_ACTB_HUMAN   | 3.8346    | ACTB        | 41.71     |
| 2               | 2              | Q13885_TBB2A_HUMAN  | 3.3786    | TUBB2A      | 49.87     |
| 2               | 2              | P07437_TBB5_HUMAN   | 2.8167    | TUBB        | 49.64     |
| 2               | 2              | Q6N021_TET2_HUMAN   | 2.6653    | TET2        | 223.67    |
| 2               | 2              | Q8NEP3_DAAF1_HUMAN  | 2.6029    | DNAAF1      | 79.98     |
| 2               | 2              | P10809_CH60_HUMAN   | 2.4989    | HSPD1       | 61.02     |
| 2               | 2              | Q01804_OTUD4_HUMAN  | 2.0036    | OTUD4       | 123.97    |
| 2               | 2              | Q00839_HNRPU_HUMAN  | 1.6535    | HNRNPU      | 90.53     |
| 1               | 77             | SAV_STRAV           | 4.105     |             | 18.82     |
| 1               | 2              | P62987_RL40_HUMAN   | 3.6545    | UBA52       | 14.72     |
| 1               | 2              | Q5TAX3_TUT4_HUMAN   | 2.9987    | ZCCHC11     | 185.05    |
| 1               | 2              | Q15233_NONO_HUMAN   | 1.863     | NONO        | 54.2      |
| 1               | 1              | Q15427_SF3B4_HUMAN  | 3.9734    | SF3B4       | 44.36     |
| 1               | 1              | Q15517_CDSN_HUMAN   | 3.8405    | CDSN        | 51.49     |
| 1               | 1              | J3KS37_J3KS37_HUMAN | 3.7783    | RECQL5      | 24.89     |
| 1               | 1              | P10599_THIO_HUMAN   | 3.7565    | TXN         | 11.73     |
| 1               | 1              | P04406_G3P_HUMAN    | 3.5858    | GAPDH       | 36.03     |
| 1               | 1              | Q13332_PTPRS_HUMAN  | 3.2222    | PTPRS       | 216.9     |
| 1               | 1              | P04350_TBB4A_HUMAN  | 3.1827    | TUBB4A      | 49.55     |
| 1               | 1              | P21333_FLNA_HUMAN   | 3.0727    | FLNA        | 280.56    |
| 1               | 1              | P34931_HS71L_HUMAN  | 2.9535    | HSPA1L      | 70.33     |
| 1               | 1              | Q16526_CRY1_HUMAN   | 2.9115    | CRY1        | 66.35     |
| 1               | 1              | P05186_PPBT_HUMAN   | 2.8877    | ALPL        | 57.27     |
| 1               | 1              | Q96QU1_PCD15_HUMAN  | 2.8057    | PCDH15      | 215.93    |
| 1               | 1              | Q92665_RT31_HUMAN   | 2.7923    | MRPS31      | 45.29     |
| 1               | 1              | Q86YV6_MYLK4_HUMAN  | 2.4998    | MYLK4       | 44.48     |
| 1               | 1              | P02545_LMNA_HUMAN   | 2.4095    | LMNA        | 74.09     |
| 1               | 1              | Q12965_MYO1E_HUMAN  | 2.2889    | MYO1E       | 126.98    |
| 1               | 1              | P68871_HBB_HUMAN    | 2.2543    | HBB         | 15.99     |

|   |   |                    |        |          |        |
|---|---|--------------------|--------|----------|--------|
| 1 | 1 | P35030_TRY3_HUMAN  | 1.934  | PRSS3    | 32.51  |
| 1 | 1 | P67870_CSK2B_HUMAN | 1.8354 | CSNK2B   | 24.93  |
| 1 | 1 | P49411_EFTU_HUMAN  | 1.7136 | TUFM     | 49.51  |
| 1 | 1 | P06748_NPM_HUMAN   | 1.7084 | NPM1     | 32.55  |
| 1 | 1 | Q5M9N0_CD158_HUMAN | 1.6388 | CCDC158  | 127.06 |
| 1 | 1 | Q02539_H11_HUMAN   | 1.5752 | HIST1H1A | 21.83  |

HF-DEK TAP-MS Protein List

| Unique Peptides | Total Peptides | Reference           | AVG Score | Gene Symbol | MWT (kDa) |
|-----------------|----------------|---------------------|-----------|-------------|-----------|
| 1               | 1              | J3KS37_J3KS37_HUMAN | 5.2064    | RECQL5      | 24.89     |
| 2               | 2              | Q01804_OTUD4_HUMAN  | 5.1261    | OTUD4       | 123.97    |
| 2               | 3              | P67809_YBOX1_HUMAN  | 5.0869    | YBX1        | 35.9      |
| 1               | 1              | Q9BRJ6_CG050_HUMAN  | 5.0349    | C7orf50     | 22.07     |
| 1               | 1              | Q9GZR7_DDX24_HUMAN  | 5.0012    | DDX24       | 96.27     |
| 1               | 1              | Q9H9A7_RMI1_HUMAN   | 4.8498    | RMI1        | 70.1      |
| 8               | 22             | P60709_ACTB_HUMAN   | 4.5358    | ACTB        | 41.71     |
| 4               | 9              | P05388_RLA0_HUMAN   | 4.39      | RPLP0       | 34.25     |
| 7               | 16             | Q07021_C1QBP_HUMAN  | 4.3528    | C1QBP       | 31.34     |
| 3               | 45             | SAV1_STRVL          | 4.3267    |             | 18.85     |
| 1               | 1              | Q9GZL7_WDR12_HUMAN  | 4.1773    | WDR12       | 47.68     |
| 2               | 2              | P27635_RL10_HUMAN   | 4.1456    | RPL10       | 24.59     |
| 1               | 14             | P07477_TRY1_HUMAN   | 4.1387    | PRSS1       | 26.54     |
| 16              | 21             | P11142_HSP7C_HUMAN  | 4.0461    | HSPA8       | 70.85     |
| 22              | 143            | P68400_CSK21_HUMAN  | 4.0218    | CSNK2A1     | 45.11     |
| 1               | 2              | Q9NYL9_TMOD3_HUMAN  | 4.0179    | TMOD3       | 39.57     |
| 2               | 3              | P0DME0_SETLP_HUMAN  | 3.9847    | SETSIP      | 34.86     |
| 104             | 145            | P35579_MYH9_HUMAN   | 3.9724    | MYH9        | 226.39    |
| 2               | 6              | P04908_H2A1B_HUMAN  | 3.9379    | HIST1H2AB   | 14.13     |
| 20              | 44             | P19784_CSK22_HUMAN  | 3.9008    | CSNK2A2     | 41.19     |
| 1               | 61             | SAV_STRAV           | 3.855     |             | 18.82     |
| 11              | 19             | P06748_NPM_HUMAN    | 3.8546    | NPM1        | 32.55     |
| 3               | 3              | Q9NY61_AATF_HUMAN   | 3.839     | AATF        | 63.09     |
| 12              | 18             | P12268_IMDH2_HUMAN  | 3.8346    | IMPDH2      | 55.77     |
| 5               | 5              | Q9BQ67_GRWD1_HUMAN  | 3.8266    | GRWD1       | 49.39     |
| 1               | 1              | Q16643_DREB_HUMAN   | 3.8002    | DBN1        | 71.39     |
| 2               | 2              | Q96QR8_PURB_HUMAN   | 3.7652    | PURB        | 33.22     |
| 5               | 10             | P35749_MYH11_HUMAN  | 3.7201    | MYH11       | 227.2     |
| 3               | 3              | O75531_BAF_HUMAN    | 3.6899    | BANF1       | 10.05     |
| 1               | 1              | P62266_RS23_HUMAN   | 3.6886    | RPS23       | 15.8      |
| 1               | 1              | M0QYS1_M0QYS1_HUMAN | 3.6874    | RPL13A      | 24.2      |
| 1               | 1              | P14649_MYL6B_HUMAN  | 3.6808    | MYL6B       | 22.75     |
| 1               | 1              | P68366_TBA4A_HUMAN  | 3.6676    | TUBA4A      | 49.89     |

|    |     |                             |        |         |        |
|----|-----|-----------------------------|--------|---------|--------|
| 26 | 36  | P11021_GRP78_HUMAN          | 3.6347 | HSPA5   | 72.29  |
| 2  | 2   | P56537_IF6_HUMAN            | 3.6299 | EIF6    | 26.58  |
| 6  | 8   | P19105_ML12A_HUMAN          | 3.5972 | MYL12A  | 19.78  |
| 13 | 33  | P67870_CSK2B_HUMAN          | 3.5934 | CSNK2B  | 24.93  |
| 7  | 11  | P05387_RLA2_HUMAN           | 3.5607 | RPLP2   | 11.66  |
| 11 | 12  | P12956_XRCC6_HUMAN          | 3.5524 | XRCC6   | 69.8   |
| 3  | 3   | Q9BVP2_GNL3_HUMAN           | 3.5513 | GNL3    | 61.95  |
| 3  | 3   | P35244_RFA3_HUMAN           | 3.5398 | RPA3    | 13.56  |
| 7  | 12  | Q8NHW5_RLA0L_HUMAN          | 3.4929 | RPLP0P6 | 34.34  |
| 45 | 324 | P35659_DEK_HUMAN            | 3.4915 | DEK     | 42.65  |
| 1  | 1   | P04083_ANXA1_HUMAN          | 3.4892 | ANXA1   | 38.69  |
| 7  | 8   | Q9UHB9_SRP68_HUMAN          | 3.479  | SRP68   | 70.69  |
| 6  | 10  | Q71U36_TBA1A_HUMAN          | 3.4579 | TUBA1A  | 50.1   |
| 1  | 1   | P61604_CH10_HUMAN           | 3.4535 | HSPE1   | 10.92  |
| 2  | 2   | P37108_SRP14_HUMAN          | 3.4497 | SRP14   | 14.56  |
| 11 | 12  | P39023_RL3_HUMAN            | 3.4426 | RPL3    | 46.08  |
| 5  | 5   | P24844_MYL9_HUMAN           | 3.4366 | MYL9    | 19.81  |
| 3  | 6   | P05386_RLA1_HUMAN           | 3.4298 | RPLP1   | 11.51  |
| 1  | 1   | Q9HCY8_S10AE_HUMAN          | 3.4193 | S100A14 | 11.65  |
| 1  | 1   | Q99551_MTEF1_HUMAN          | 3.4182 | MTERF1  | 45.75  |
| 11 | 14  | P35580_MYH10_HUMAN          | 3.4102 | MYH10   | 228.86 |
| 2  | 2   | P62304_RUXE_HUMAN           | 3.3959 | SNRPE   | 10.8   |
| 2  | 5   | D6RDA2_D6RDA2_HUMAN         | 3.379  | DEK     | 14.15  |
| 8  | 10  | P62888_RL30_HUMAN           | 3.3693 | RPL30   | 12.78  |
| 2  | 2   | Q71UI9_H2AV_HUMAN           | 3.3651 | H2AFV   | 13.5   |
| 5  | 7   | P08107_HSP71_HUMAN          | 3.3471 | HSPA1A  | 70.01  |
| 7  | 7   | O43143_DHX15_HUMAN          | 3.3394 | DHX15   | 90.88  |
| 1  | 1   | Q13332_PTPRS_HUMAN          | 3.3343 | PTPRS   | 216.9  |
| 3  | 6   | P62987_RL40_HUMAN           | 3.3242 | UBA52   | 14.72  |
| 2  | 2   | Q12965_MYO1E_HUMAN          | 3.3118 | MYO1E   | 126.98 |
| 2  | 2   | Q13610_PWP1_HUMAN           | 3.3056 | PWP1    | 55.79  |
| 2  | 2   | P07437_TBB5_HUMAN           | 3.3008 | TUBB    | 49.64  |
| 1  | 2   | A0A088AWL3_A0A088AWL3_HUMAN | 3.2946 | NCOR1   | 258.83 |
| 1  | 1   | P47914_RL29_HUMAN           | 3.2913 | RPL29   | 17.74  |
| 3  | 5   | P54652_HSP72_HUMAN          | 3.2791 | HSPA2   | 69.98  |

|    |    |                    |        |           |        |
|----|----|--------------------|--------|-----------|--------|
| 4  | 5  | P46778_RL21_HUMAN  | 3.2592 | RPL21     | 18.55  |
| 3  | 3  | P62899_RL31_HUMAN  | 3.2574 | RPL31     | 14.45  |
| 3  | 3  | Q8WXX5_DNJC9_HUMAN | 3.2487 | DNAJC9    | 29.89  |
| 16 | 30 | P62736_ACTA_HUMAN  | 3.2486 | ACTA2     | 41.98  |
| 5  | 5  | Q08945_SSRP1_HUMAN | 3.2326 | SSRP1     | 81.02  |
| 9  | 12 | P27694_RFA1_HUMAN  | 3.2309 | RPA1      | 68.1   |
| 1  | 1  | Q06330_SUH_HUMAN   | 3.2222 | RBPJ      | 55.6   |
| 3  | 3  | IGKC_MOUSE         | 3.2175 |           | 11.77  |
| 9  | 9  | Q9NW13_RBM28_HUMAN | 3.1989 | RBM28     | 85.68  |
| 4  | 10 | P30050_RL12_HUMAN  | 3.1964 | RPL12     | 17.81  |
| 7  | 7  | P07355_ANXA2_HUMAN | 3.1949 | ANXA2     | 38.58  |
| 2  | 2  | O60264_SMCA5_HUMAN | 3.1931 | SMARCA5   | 121.83 |
| 10 | 11 | P38646_GRP75_HUMAN | 3.1926 | HSPA9     | 73.63  |
| 1  | 1  | E9PRG8_CK098_HUMAN | 3.1908 | C11orf98  | 13.79  |
| 5  | 13 | P33778_H2B1B_HUMAN | 3.1878 | HIST1H2BB | 13.94  |
| 1  | 1  | Q96L21_RL10L_HUMAN | 3.1683 | RPL10L    | 24.5   |
| 1  | 1  | Q5M9N0_CD158_HUMAN | 3.154  | CCDC158   | 127.06 |
| 2  | 3  | IGH1M_MOUSE        | 3.1401 | Ighg1     | 43.36  |
| 1  | 1  | Q6DN03_H2B2C_HUMAN | 3.1335 | HIST2H2BC | 21.46  |
| 1  | 2  | Q16526_CRY1_HUMAN  | 3.1238 | CRY1      | 66.35  |
| 5  | 7  | P62906_RL10A_HUMAN | 3.1148 | RPL10A    | 24.82  |
| 5  | 6  | P62424_RL7A_HUMAN  | 3.1044 | RPL7A     | 29.98  |
| 1  | 2  | P20671_H2A1D_HUMAN | 3.1007 | HIST1H2AD | 14.1   |
| 2  | 5  | P31943_HNRH1_HUMAN | 3.0916 | HNRNPH1   | 49.2   |
| 1  | 6  | Q5TAX3_TUT4_HUMAN  | 3.0913 | ZCCHC11   | 185.05 |
| 1  | 1  | P84098_RL19_HUMAN  | 3.0891 | RPL19     | 23.45  |
| 4  | 5  | Q9UGN5_PARP2_HUMAN | 3.0695 | PARP2     | 66.16  |
| 1  | 1  | P46776_RL27A_HUMAN | 3.0667 | RPL27A    | 16.55  |
| 4  | 4  | Q15233_NONO_HUMAN  | 3.064  | NONO      | 54.2   |
| 3  | 3  | Q99417_MYCBP_HUMAN | 3.0532 | MYCBP     | 11.96  |
| 2  | 2  | P09493_TPM1_HUMAN  | 3.0522 | TPM1      | 32.69  |
| 1  | 1  | Q15517_CDSN_HUMAN  | 3.0302 | CDSN      | 51.49  |
| 6  | 11 | P62913_RL11_HUMAN  | 3.0273 | RPL11     | 20.24  |
| 4  | 5  | Q13885_TBB2A_HUMAN | 3.0256 | TUBB2A    | 49.87  |
| 1  | 1  | Q14103_HNRPD_HUMAN | 3.0247 | HNRNPD    | 38.41  |
| 3  | 5  | Q9BYX7_ACTBM_HUMAN | 3.0143 | POTEKP    | 41.99  |

|    |    |                    |        |           |        |
|----|----|--------------------|--------|-----------|--------|
| 7  | 7  | P62277_RS13_HUMAN  | 3.0092 | RPS13     | 17.21  |
| 1  | 1  | Q8N6Y2_LRC17_HUMAN | 3.0034 | LRRC17    | 51.77  |
| 2  | 2  | P83731_RL24_HUMAN  | 3.0031 | RPL24     | 17.77  |
| 2  | 2  | P62701_RS4X_HUMAN  | 2.9965 | RPS4X     | 29.58  |
| 3  | 3  | P04406_G3P_HUMAN   | 2.994  | GAPDH     | 36.03  |
| 5  | 7  | P60660_MYL6_HUMAN  | 2.9658 | MYL6      | 16.92  |
| 1  | 1  | Q12906_ILF3_HUMAN  | 2.9658 | ILF3      | 95.28  |
| 7  | 7  | P05186_PPBT_HUMAN  | 2.9629 | ALPL      | 57.27  |
| 4  | 4  | Q00839_HNRPU_HUMAN | 2.9609 | HNRNPU    | 90.53  |
| 3  | 3  | Q15208_STK38_HUMAN | 2.9599 | STK38     | 54.16  |
| 11 | 15 | P18124_RL7_HUMAN   | 2.9567 | RPL7      | 29.21  |
| 1  | 1  | O95140_MFN2_HUMAN  | 2.9555 | MFN2      | 86.35  |
| 8  | 18 | P62805_H4_HUMAN    | 2.9519 | HIST1H4A  | 11.36  |
| 1  | 1  | Q15397_K0020_HUMAN | 2.9518 | KIAA0020  | 73.54  |
| 8  | 10 | Q04837_SSBP_HUMAN  | 2.9517 | SSBP1     | 17.25  |
| 1  | 4  | KV2A7_MOUSE        | 2.9378 |           | 12.27  |
| 1  | 1  | Q92665_RT31_HUMAN  | 2.9318 | MRPS31    | 45.29  |
| 4  | 4  | P62829_RL23_HUMAN  | 2.9282 | RPL23     | 14.86  |
| 1  | 1  | O00159_MYO1C_HUMAN | 2.9179 | MYO1C     | 121.61 |
| 1  | 1  | Q9UKN7_MYO15_HUMAN | 2.9174 | MYO15A    | 395.04 |
| 3  | 3  | P50402_EMD_HUMAN   | 2.9173 | EMD       | 28.98  |
| 3  | 3  | P10809_CH60_HUMAN  | 2.9139 | HSPD1     | 61.02  |
| 2  | 2  | Q9Y3B9_RRP15_HUMAN | 2.888  | RRP15     | 31.46  |
| 4  | 4  | P46777_RL5_HUMAN   | 2.887  | RPL5      | 34.34  |
| 3  | 3  | Q00577_PURA_HUMAN  | 2.8834 | PURA      | 34.89  |
| 2  | 2  | P10599_THIO_HUMAN  | 2.8833 | TXN       | 11.73  |
| 1  | 3  | Q86YV6_MYLK4_HUMAN | 2.8718 | MYLK4     | 44.48  |
| 6  | 6  | P34931_HS71L_HUMAN | 2.8695 | HSPA1L    | 70.33  |
| 2  | 2  | Q15393_SF3B3_HUMAN | 2.8612 | SF3B3     | 135.49 |
| 3  | 9  | Q96QV6_H2A1A_HUMAN | 2.8325 | HIST1H2AA | 14.22  |
| 3  | 3  | P49411_EFTU_HUMAN  | 2.7971 | TUFM      | 49.51  |
| 3  | 4  | P62841_RS15_HUMAN  | 2.7931 | RPS15     | 17.03  |
| 3  | 6  | P35030_TRY3_HUMAN  | 2.7914 | PRSS3     | 32.51  |
| 2  | 3  | Q9NUL3_STAU2_HUMAN | 2.7878 | STAU2     | 62.6   |
| 2  | 2  | Q9H4B7_TBB1_HUMAN  | 2.7725 | TUBB1     | 50.29  |
| 6  | 6  | Q9NR30_DDX21_HUMAN | 2.7513 | DDX21     | 87.29  |

|    |    |                    |        |           |        |
|----|----|--------------------|--------|-----------|--------|
| 2  | 2  | Q92522_H1X_HUMAN   | 2.7193 | H1FX      | 22.47  |
| 8  | 9  | P62269_RS18_HUMAN  | 2.6909 | RPS18     | 17.71  |
| 4  | 4  | P15927_RFA2_HUMAN  | 2.676  | RPA2      | 29.23  |
| 7  | 7  | P39019_RS19_HUMAN  | 2.6739 | RPS19     | 16.05  |
| 2  | 2  | P62318_SMD3_HUMAN  | 2.6709 | SNRPD3    | 13.91  |
| 16 | 17 | P13010_XRCC5_HUMAN | 2.6401 | XRCC5     | 82.65  |
| 6  | 6  | P46087_NOP2_HUMAN  | 2.6343 | NOP2      | 89.25  |
| 7  | 8  | P62750_RL23A_HUMAN | 2.6215 | RPL23A    | 17.68  |
| 6  | 7  | P26373_RL13_HUMAN  | 2.6187 | RPL13     | 24.25  |
| 6  | 7  | Q9UNX3_RL26L_HUMAN | 2.6163 | RPL26L1   | 17.25  |
| 2  | 2  | Q02539_H11_HUMAN   | 2.6087 | HIST1H1A  | 21.83  |
| 5  | 7  | P20839_IMDH1_HUMAN | 2.607  | IMPDH1    | 55.37  |
| 1  | 1  | Q96QU1_PCD15_HUMAN | 2.5853 | PCDH15    | 215.93 |
| 2  | 2  | P04792_HSPB1_HUMAN | 2.5838 | HSPB1     | 22.77  |
| 5  | 5  | Q99848_EBP2_HUMAN  | 2.5746 | EBNA1BP2  | 34.83  |
| 10 | 11 | P52272_HNRPM_HUMAN | 2.5685 | HNRNPM    | 77.46  |
| 6  | 6  | P02545_LMNA_HUMAN  | 2.5639 | LMNA      | 74.09  |
| 4  | 4  | P36578_RL4_HUMAN   | 2.5362 | RPL4      | 47.67  |
| 2  | 2  | Q6P1J9_CDC73_HUMAN | 2.5269 | CDC73     | 60.54  |
| 13 | 13 | Q7L2E3_DHX30_HUMAN | 2.494  | DHX30     | 133.85 |
| 2  | 2  | P78332_RBM6_HUMAN  | 2.4595 | RBM6      | 128.57 |
| 2  | 2  | O00425_IF2B3_HUMAN | 2.422  | IGF2BP3   | 63.67  |
| 5  | 6  | P62280_RS11_HUMAN  | 2.3151 | RPS11     | 18.42  |
| 3  | 6  | P62807_H2B1C_HUMAN | 2.2917 | HIST1H2BC | 13.9   |
| 3  | 3  | O76094_SRP72_HUMAN | 2.2839 | SRP72     | 74.56  |
| 5  | 5  | P19338_NUCL_HUMAN  | 2.2821 | NCL       | 76.57  |
| 2  | 3  | P62917_RL8_HUMAN   | 2.2037 | RPL8      | 28.01  |
| 5  | 8  | Q16695_H31T_HUMAN  | 2.1839 | HIST3H3   | 15.5   |
| 1  | 1  | P21333_FLNA_HUMAN  | 1.7759 | FLNA      | 280.56 |

## MIEG TAP-MS Peptide List

| ScanF | z | XCorr | Corr  | # Ions | Reference          | Redun | Peptide                   | Gene Symbol |
|-------|---|-------|-------|--------|--------------------|-------|---------------------------|-------------|
| 2519  | 2 | 6.806 | 0.654 | 28/36  | SAV_STRAV          | 0     | R.NAHSATTWSGQYVGGAEAR.I   |             |
| 6212  | 2 | 6.18  | 0.635 | 27/40  | SAV1_STRVL         | 2     | R.YDSAPATDGSGTALGWTVAWK.N |             |
| 5706  | 3 | 6.142 | 0.527 | 31/80  | SAV1_STRVL         | 2     | R.YDSAPATDGSGTALGWTVAWK.N |             |
| 5673  | 3 | 6.082 | 0.559 | 32/80  | SAV1_STRVL         | 2     | R.YDSAPATDGSGTALGWTVAWK.N |             |
| 5759  | 2 | 6.077 | 0.405 | 26/34  | SAV1_STRVL         | 1     | R.INTQWLLTSGTTEANAWK.S    |             |
| 2469  | 2 | 6.044 | 0.655 | 27/36  | SAV_STRAV          | 0     | R.NAHSATTWSGQYVGGAEAR.I   |             |
| 5802  | 2 | 6.037 | 0.527 | 26/34  | SAV1_STRVL         | 1     | R.INTQWLLTSGTTEANAWK.S    |             |
| 5738  | 2 | 6.017 | 0.664 | 29/40  | SAV1_STRVL         | 2     | R.YDSAPATDGSGTALGWTVAWK.N |             |
| 6535  | 2 | 6.008 | 0.599 | 25/32  | Q9H9A7_RMI1_HUMAN  | 2     | K.VLGGEVDALLEEYAQEK.V     | RMI1        |
| 5852  | 2 | 5.943 | 0.524 | 25/34  | SAV1_STRVL         | 1     | R.INTQWLLTSGTTEANAWK.S    |             |
| 5754  | 2 | 5.858 | 0.664 | 29/40  | SAV1_STRVL         | 2     | R.YDSAPATDGSGTALGWTVAWK.N |             |
| 5834  | 2 | 5.81  | 0.647 | 28/40  | SAV1_STRVL         | 2     | R.YDSAPATDGSGTALGWTVAWK.N |             |
| 7593  | 2 | 5.809 | 0.689 | 28/36  | SAV_STRAV          | 0     | R.NAHSATTWSGQYVGGAEAR.I   |             |
| 5654  | 2 | 5.798 | 0.674 | 27/40  | SAV1_STRVL         | 2     | R.YDSAPATDGSGTALGWTVAWK.N |             |
| 7450  | 2 | 5.788 | 0.669 | 26/40  | SAV1_STRVL         | 2     | R.YDSAPATDGSGTALGWTVAWK.N |             |
| 6524  | 2 | 5.765 | 0.562 | 25/32  | Q9H9A7_RMI1_HUMAN  | 2     | K.VLGGEVDALLEEYAQEK.V     | RMI1        |
| 5638  | 2 | 5.743 | 0.686 | 29/40  | SAV1_STRVL         | 2     | R.YDSAPATDGSGTALGWTVAWK.N |             |
| 5850  | 2 | 5.691 | 0.661 | 30/40  | SAV1_STRVL         | 2     | R.YDSAPATDGSGTALGWTVAWK.N |             |
| 5225  | 3 | 5.57  | 0.177 | 34/76  | P07477_TRY1_HUMAN  | 10    | R.LGEHNIEVLEGNEQFINAAK.I  | PRSS1       |
| 5751  | 3 | 5.569 | 0.582 | 32/68  | SAV1_STRVL         | 1     | R.INTQWLLTSGTTEANAWK.S    |             |
| 2515  | 2 | 5.564 | 0.661 | 30/36  | SAV_STRAV          | 0     | R.NAHSATTWSGQYVGGAEAR.I   |             |
| 7431  | 2 | 5.561 | 0.52  | 25/34  | SAV1_STRVL         | 1     | R.INTQWLLTSGTTEANAWK.S    |             |
| 5929  | 2 | 5.53  | 0.647 | 27/40  | SAV1_STRVL         | 2     | R.YDSAPATDGSGTALGWTVAWK.N |             |
| 5961  | 3 | 5.513 | 0.398 | 34/80  | SAV1_STRVL         | 2     | R.YDSAPATDGSGTALGWTVAWK.N |             |
| 5898  | 3 | 5.477 | 0.507 | 31/80  | SAV1_STRVL         | 2     | R.YDSAPATDGSGTALGWTVAWK.N |             |
| 2707  | 2 | 5.434 | 0.663 | 26/36  | SAV_STRAV          | 0     | R.NAHSATTWSGQYVGGAEAR.I   |             |
| 5770  | 3 | 5.426 | 0.502 | 31/80  | SAV1_STRVL         | 2     | R.YDSAPATDGSGTALGWTVAWK.N |             |
| 6967  | 2 | 5.401 | 0.638 | 27/40  | SAV1_STRVL         | 2     | R.YDSAPATDGSGTALGWTVAWK.N |             |
| 2899  | 2 | 5.38  | 0.647 | 25/36  | SAV_STRAV          | 0     | R.NAHSATTWSGQYVGGAEAR.I   |             |
| 6281  | 3 | 5.369 | 0.5   | 34/80  | SAV1_STRVL         | 2     | R.YDSAPATDGSGTALGWTVAWK.N |             |
| 6025  | 2 | 5.337 | 0.636 | 27/40  | SAV1_STRVL         | 2     | R.YDSAPATDGSGTALGWTVAWK.N |             |
| 5946  | 2 | 5.321 | 0.653 | 28/40  | SAV1_STRVL         | 2     | R.YDSAPATDGSGTALGWTVAWK.N |             |
| 6038  | 2 | 5.305 | 0.626 | 25/40  | SAV1_STRVL         | 2     | R.YDSAPATDGSGTALGWTVAWK.N |             |
| 6408  | 2 | 5.259 | 0.632 | 25/40  | SAV1_STRVL         | 2     | R.YDSAPATDGSGTALGWTVAWK.N |             |
| 6217  | 2 | 5.249 | 0.564 | 26/40  | SAV1_STRVL         | 2     | R.YDSAPATDGSGTALGWTVAWK.N |             |
| 5192  | 3 | 5.234 | 0.207 | 32/76  | P07477_TRY1_HUMAN  | 10    | R.LGEHNIEVLEGNEQFINAAK.I  | PRSS1       |
| 7446  | 3 | 5.227 | 0.412 | 30/80  | SAV1_STRVL         | 2     | R.YDSAPATDGSGTALGWTVAWK.N |             |
| 5866  | 3 | 5.211 | 0.491 | 31/80  | SAV1_STRVL         | 2     | R.YDSAPATDGSGTALGWTVAWK.N |             |
| 7078  | 2 | 5.21  | 0.605 | 26/40  | SAV1_STRVL         | 2     | R.YDSAPATDGSGTALGWTVAWK.N |             |
| 6505  | 2 | 5.198 | 0.551 | 25/40  | SAV1_STRVL         | 2     | R.YDSAPATDGSGTALGWTVAWK.N |             |
| 6120  | 2 | 5.191 | 0.604 | 25/40  | SAV1_STRVL         | 2     | R.YDSAPATDGSGTALGWTVAWK.N |             |
| 4981  | 2 | 5.179 | 0.549 | 26/30  | P62736_ACTA_HUMAN  | 9     | K.SYELPDGQVITIGNER.F      | ACTA2       |
| 4959  | 2 | 5.176 | 0.282 | 25/38  | P07477_TRY1_HUMAN  | 10    | R.LGEHNIEVLEGNEQFINAAK.I  | PRSS1       |
| 6616  | 2 | 5.174 | 0.599 | 26/40  | SAV1_STRVL         | 2     | R.YDSAPATDGSGTALGWTVAWK.N |             |
| 6146  | 3 | 5.169 | 0.439 | 30/80  | SAV1_STRVL         | 2     | R.YDSAPATDGSGTALGWTVAWK.N |             |
| 6537  | 3 | 5.164 | 0.477 | 29/64  | Q9H9A7_RMI1_HUMAN  | 2     | K.VLGGEVDALLEEYAQEK.V     | RMI1        |
| 6312  | 2 | 5.151 | 0.632 | 23/40  | SAV1_STRVL         | 2     | R.YDSAPATDGSGTALGWTVAWK.N |             |
| 6824  | 2 | 5.143 | 0.629 | 28/40  | SAV1_STRVL         | 2     | R.YDSAPATDGSGTALGWTVAWK.N |             |
| 6528  | 3 | 5.135 | 0.485 | 32/64  | Q9H9A7_RMI1_HUMAN  | 2     | K.VLGGEVDALLEEYAQEK.V     | RMI1        |
| 7417  | 2 | 5.101 | 0.584 | 24/36  | SAV_STRAV          | 0     | R.NAHSATTWSGQYVGGAEAR.I   |             |
| 6344  | 3 | 5.078 | 0.484 | 37/80  | SAV1_STRVL         | 2     | R.YDSAPATDGSGTALGWTVAWK.N |             |
| 5786  | 3 | 5.078 | 0.53  | 33/68  | SAV1_STRVL         | 1     | R.INTQWLLTSGTTEANAWK.S    |             |
| 5373  | 2 | 5.059 | 0.657 | 22/38  | Q71U36_TBA1A_HUMAN | 14    | K.TIGGGDDSFNTFFSETGAGK.H  | TUBA1A      |
| 6720  | 3 | 5.055 | 0.487 | 32/80  | SAV1_STRVL         | 2     | R.YDSAPATDGSGTALGWTVAWK.N |             |
| 7678  | 3 | 5.03  | 0.453 | 31/80  | SAV1_STRVL         | 2     | R.YDSAPATDGSGTALGWTVAWK.N |             |
| 6216  | 2 | 5.02  | 0.676 | 24/40  | SAV1_STRVL         | 2     | R.YDSAPATDGSGTALGWTVAWK.N |             |
| 6054  | 3 | 5.011 | 0.538 | 29/80  | SAV1_STRVL         | 2     | R.YDSAPATDGSGTALGWTVAWK.N |             |
| 6583  | 2 | 5.003 | 0.464 | 19/34  | SAV1_STRVL         | 1     | R.INTQWLLTSGTTEANAWK.S    |             |
| 5124  | 2 | 4.971 | 0.289 | 23/38  | P07477_TRY1_HUMAN  | 10    | R.LGEHNIEVLEGNEQFINAAK.I  | PRSS1       |
| 4958  | 2 | 4.96  | 0.533 | 25/30  | P62736_ACTA_HUMAN  | 9     | K.SYELPDGQVITIGNER.F      | ACTA2       |
| 7704  | 3 | 4.96  | 0.42  | 30/72  | SAV_STRAV          | 0     | R.NAHSATTWSGQYVGGAEAR.I   |             |
| 5130  | 3 | 4.945 | 0.247 | 36/76  | P07477_TRY1_HUMAN  | 10    | R.LGEHNIEVLEGNEQFINAAK.I  | PRSS1       |
| 6697  | 2 | 4.912 | 0.607 | 25/40  | SAV1_STRVL         | 2     | R.YDSAPATDGSGTALGWTVAWK.N |             |
| 6886  | 2 | 4.9   | 0.61  | 24/40  | SAV1_STRVL         | 2     | R.YDSAPATDGSGTALGWTVAWK.N |             |
| 7448  | 2 | 4.891 | 0.33  | 21/34  | SAV1_STRVL         | 1     | R.INTQWLLTSGTTEANAWK.S    |             |
| 7251  | 2 | 4.889 | 0.636 | 22/40  | SAV1_STRVL         | 2     | R.YDSAPATDGSGTALGWTVAWK.N |             |
| 6614  | 3 | 4.87  | 0.413 | 32/80  | SAV1_STRVL         | 2     | R.YDSAPATDGSGTALGWTVAWK.N |             |
| 6314  | 2 | 4.851 | 0.56  | 28/40  | SAV1_STRVL         | 2     | R.YDSAPATDGSGTALGWTVAWK.N |             |
| 7417  | 2 | 4.829 | 0.646 | 20/36  | SAV_STRAV          | 0     | R.NAHSATTWSGQYVGGAEAR.I   |             |
| 7610  | 3 | 4.806 | 0.406 | 30/72  | SAV_STRAV          | 0     | R.NAHSATTWSGQYVGGAEAR.I   |             |
| 5992  | 3 | 4.798 | 0.452 | 32/80  | SAV1_STRVL         | 2     | R.YDSAPATDGSGTALGWTVAWK.N |             |
| 4328  | 3 | 4.787 | 0.223 | 36/68  | P07355_ANXA2_HUMAN | 8     | R.RAEDGSVIDYELIDQDAR.D    | ANXA2       |
| 5941  | 2 | 4.775 | 0.389 | 21/34  | SAV1_STRVL         | 1     | R.INTQWLLTSGTTEANAWK.S    |             |
| 5904  | 2 | 4.773 | 0.533 | 19/34  | SAV1_STRVL         | 1     | R.INTQWLLTSGTTEANAWK.S    |             |



|      |   |       |       |       |                    |    |                            |        |
|------|---|-------|-------|-------|--------------------|----|----------------------------|--------|
| 6515 | 3 | 4.768 | 0.508 | 36/80 | SAV1_STRVL         | 2  | R.YDSAPATDGSGLTALGWTVAWK.N |        |
| 7718 | 2 | 4.728 | 0.608 | 18/40 | SAV1_STRVL         | 2  | R.YDSAPATDGSGLTALGWTVAWK.N |        |
| 5879 | 3 | 4.727 | 0.527 | 29/68 | SAV1_STRVL         | 1  | R.INTQWLLTSGTTEANAWK.S     |        |
| 5034 | 3 | 4.706 | 0.332 | 29/76 | P07477_TRY1_HUMAN  | 10 | R.LGEHNIEVLEQNEQFINAAK.I   | PRSS1  |
| 6518 | 2 | 4.695 | 0.625 | 26/40 | SAV1_STRVL         | 2  | R.YDSAPATDGSGLTALGWTVAWK.N |        |
| 6916 | 2 | 4.694 | 0.554 | 25/40 | SAV1_STRVL         | 2  | R.YDSAPATDGSGLTALGWTVAWK.N |        |
| 5945 | 2 | 4.687 | 0.334 | 23/28 | Q71U36_TBA1A_HUMAN | 10 | R.AVFVDLEPTVIDEVR.T        | TUBA1A |
| 7753 | 3 | 4.682 | 0.42  | 31/72 | SAV_STRAV          | 0  | R.NAHSATTWSGQYVGGAEAR.I    |        |
| 5848 | 3 | 4.668 | 0.487 | 33/68 | SAV1_STRVL         | 1  | R.INTQWLLTSGTTEANAWK.S     |        |
| 4150 | 3 | 4.668 | 0.458 | 29/84 | P60709_ACTB_HUMAN  | 1  | R.KDLYANTVLSGGTTM*YPIADR.M | ACTB   |
| 7802 | 3 | 4.667 | 0.458 | 31/72 | SAV_STRAV          | 0  | R.NAHSATTWSGQYVGGAEAR.I    |        |
| 5726 | 2 | 4.66  | 0.447 | 23/34 | P35579_MYH9_HUMAN  | 0  | K.LQVELDNVTGLLSQSDSK.S     | MYH9   |
| 7607 | 2 | 4.656 | 0.578 | 25/40 | SAV1_STRVL         | 2  | R.YDSAPATDGSGLTALGWTVAWK.N |        |
| 3050 | 3 | 4.654 | 0.402 | 30/72 | SAV_STRAV          | 0  | R.NAHSATTWSGQYVGGAEAR.I    |        |
| 6089 | 3 | 4.646 | 0.422 | 29/80 | SAV1_STRVL         | 2  | R.YDSAPATDGSGLTALGWTVAWK.N |        |
| 6313 | 2 | 4.646 | 0.653 | 22/40 | SAV1_STRVL         | 2  | R.YDSAPATDGSGLTALGWTVAWK.N |        |
| 7402 | 3 | 4.637 | 0.409 | 28/72 | SAV_STRAV          | 0  | R.NAHSATTWSGQYVGGAEAR.I    |        |
| 3098 | 3 | 4.632 | 0.434 | 29/72 | SAV_STRAV          | 0  | R.NAHSATTWSGQYVGGAEAR.I    |        |
| 3146 | 3 | 4.624 | 0.381 | 30/72 | SAV_STRAV          | 0  | R.NAHSATTWSGQYVGGAEAR.I    |        |
| 7113 | 3 | 4.61  | 0.331 | 31/72 | SAV_STRAV          | 0  | R.NAHSATTWSGQYVGGAEAR.I    |        |
| 7468 | 3 | 4.598 | 0.353 | 28/80 | SAV1_STRVL         | 2  | R.YDSAPATDGSGLTALGWTVAWK.N |        |
| 2570 | 3 | 4.588 | 0.416 | 30/72 | SAV_STRAV          | 0  | R.NAHSATTWSGQYVGGAEAR.I    |        |
| 6121 | 2 | 4.586 | 0.636 | 26/40 | SAV1_STRVL         | 2  | R.YDSAPATDGSGLTALGWTVAWK.N |        |
| 7306 | 3 | 4.579 | 0.471 | 33/72 | SAV_STRAV          | 0  | R.NAHSATTWSGQYVGGAEAR.I    |        |
| 5970 | 3 | 4.562 | 0.454 | 30/68 | SAV1_STRVL         | 1  | R.INTQWLLTSGTTEANAWK.S     |        |
| 6514 | 3 | 4.558 | 0.451 | 31/80 | SAV1_STRVL         | 2  | R.YDSAPATDGSGLTALGWTVAWK.N |        |
| 6282 | 3 | 4.555 | 0.397 | 29/72 | SAV_STRAV          | 0  | R.NAHSATTWSGQYVGGAEAR.I    |        |
| 6717 | 3 | 4.532 | 0.454 | 29/80 | SAV1_STRVL         | 2  | R.YDSAPATDGSGLTALGWTVAWK.N |        |
| 6802 | 3 | 4.508 | 0.396 | 29/80 | SAV1_STRVL         | 2  | R.YDSAPATDGSGLTALGWTVAWK.N |        |
| 2665 | 3 | 4.489 | 0.41  | 29/72 | SAV_STRAV          | 0  | R.NAHSATTWSGQYVGGAEAR.I    |        |
| 2954 | 3 | 4.431 | 0.361 | 29/72 | SAV_STRAV          | 0  | R.NAHSATTWSGQYVGGAEAR.I    |        |
| 5550 | 2 | 4.427 | 0.528 | 19/38 | P35579_MYH9_HUMAN  | 0  | R.IIGLDQVAGM*SETALPGAFK.T  | MYH9   |
| 4072 | 3 | 4.386 | 0.397 | 31/72 | SAV_STRAV          | 0  | R.NAHSATTWSGQYVGGAEAR.I    |        |
| 6185 | 3 | 4.369 | 0.433 | 31/72 | SAV_STRAV          | 0  | R.NAHSATTWSGQYVGGAEAR.I    |        |
| 6826 | 3 | 4.361 | 0.418 | 30/72 | SAV_STRAV          | 0  | R.NAHSATTWSGQYVGGAEAR.I    |        |
| 7306 | 3 | 4.338 | 0.372 | 30/72 | SAV_STRAV          | 0  | R.NAHSATTWSGQYVGGAEAR.I    |        |
| 5046 | 2 | 4.329 | 0.29  | 21/38 | P07477_TRY1_HUMAN  | 10 | R.LGEHNIEVLEQNEQFINAAK.I   | PRSS1  |
| 4295 | 2 | 4.309 | 0.496 | 26/34 | Q71U36_TBA1A_HUMAN | 9  | K.VGINYQPPTVPPGDLAK.V      | TUBA1A |
| 7210 | 3 | 4.303 | 0.354 | 33/72 | SAV_STRAV          | 0  | R.NAHSATTWSGQYVGGAEAR.I    |        |
| 7211 | 3 | 4.295 | 0.448 | 26/80 | SAV1_STRVL         | 2  | R.YDSAPATDGSGLTALGWTVAWK.N |        |
| 7111 | 3 | 4.295 | 0.432 | 28/80 | SAV1_STRVL         | 2  | R.YDSAPATDGSGLTALGWTVAWK.N |        |
| 5706 | 3 | 4.294 | 0.356 | 27/72 | SAV_STRAV          | 0  | R.NAHSATTWSGQYVGGAEAR.I    |        |
| 4341 | 2 | 4.288 | 0.297 | 21/30 | P62987_RL40_HUMAN  | 22 | K.TITLEVEPSDTIENK.A        | UBA52  |
| 7658 | 3 | 4.28  | 0.422 | 30/72 | SAV_STRAV          | 0  | R.NAHSATTWSGQYVGGAEAR.I    |        |
| 6922 | 3 | 4.27  | 0.457 | 31/72 | SAV_STRAV          | 0  | R.NAHSATTWSGQYVGGAEAR.I    |        |
| 2762 | 3 | 4.27  | 0.365 | 30/72 | SAV_STRAV          | 0  | R.NAHSATTWSGQYVGGAEAR.I    |        |
| 2472 | 3 | 4.247 | 0.403 | 28/72 | SAV_STRAV          | 0  | R.NAHSATTWSGQYVGGAEAR.I    |        |
| 7114 | 3 | 4.247 | 0.292 | 26/72 | SAV_STRAV          | 0  | R.NAHSATTWSGQYVGGAEAR.I    |        |
| 3976 | 3 | 4.234 | 0.403 | 29/72 | SAV_STRAV          | 0  | R.NAHSATTWSGQYVGGAEAR.I    |        |
| 2882 | 2 | 4.191 | 0.596 | 20/36 | SAV_STRAV          | 0  | R.NAHSATTWSGQYVGGAEAR.I    |        |
| 2858 | 3 | 4.185 | 0.368 | 30/72 | SAV_STRAV          | 0  | R.NAHSATTWSGQYVGGAEAR.I    |        |
| 4941 | 3 | 4.184 | 0.386 | 26/72 | SAV_STRAV          | 0  | R.NAHSATTWSGQYVGGAEAR.I    |        |
| 4457 | 3 | 4.156 | 0.384 | 28/72 | SAV_STRAV          | 0  | R.NAHSATTWSGQYVGGAEAR.I    |        |
| 6378 | 3 | 4.156 | 0.444 | 27/72 | SAV_STRAV          | 0  | R.NAHSATTWSGQYVGGAEAR.I    |        |
| 7018 | 3 | 4.15  | 0.444 | 32/72 | SAV_STRAV          | 0  | R.NAHSATTWSGQYVGGAEAR.I    |        |
| 3591 | 2 | 4.14  | 0.46  | 20/24 | P35659_DEK_HUMAN   | 2  | K.VYENYPTYDLTER.K          | DEK    |
| 5895 | 3 | 4.129 | 0.419 | 32/72 | SAV_STRAV          | 0  | R.NAHSATTWSGQYVGGAEAR.I    |        |
| 4837 | 3 | 4.121 | 0.311 | 28/72 | SAV_STRAV          | 0  | R.NAHSATTWSGQYVGGAEAR.I    |        |
| 6996 | 3 | 4.109 | 0.416 | 27/80 | SAV1_STRVL         | 2  | R.YDSAPATDGSGLTALGWTVAWK.N |        |
| 4742 | 3 | 4.089 | 0.36  | 27/72 | SAV_STRAV          | 0  | R.NAHSATTWSGQYVGGAEAR.I    |        |
| 5866 | 3 | 4.063 | 0.383 | 31/72 | SAV_STRAV          | 0  | R.NAHSATTWSGQYVGGAEAR.I    |        |
| 4262 | 3 | 4.05  | 0.444 | 27/72 | SAV_STRAV          | 0  | R.NAHSATTWSGQYVGGAEAR.I    |        |
| 6570 | 3 | 4.04  | 0.363 | 29/72 | SAV_STRAV          | 0  | R.NAHSATTWSGQYVGGAEAR.I    |        |
| 4636 | 2 | 4.004 | 0.505 | 18/30 | Q15393_SF3B3_HUMAN | 0  | K.TPVEEVPAAIAPFQGR.V       | SF3B3  |
| 5224 | 2 | 3.988 | 0.247 | 22/38 | P07477_TRY1_HUMAN  | 10 | R.LGEHNIEVLEQNEQFINAAK.I   | PRSS1  |
| 4407 | 2 | 3.982 | 0.461 | 20/28 | Q13885_TBB2A_HUMAN | 9  | R.AILVDLEPGTM*DSVR.S       | TUBB2A |
| 3008 | 2 | 3.973 | 0.496 | 19/26 | Q15427_SF3B4_HUMAN | 0  | R.NQDATVYVYVGLDEK.V        | SF3B4  |
| 3242 | 3 | 3.965 | 0.385 | 26/72 | SAV_STRAV          | 0  | R.NAHSATTWSGQYVGGAEAR.I    |        |
| 3572 | 2 | 3.955 | 0.441 | 21/24 | P35659_DEK_HUMAN   | 2  | K.LLASANLEEVTK.Q           | DEK    |
| 6089 | 3 | 3.945 | 0.332 | 29/72 | SAV_STRAV          | 0  | R.NAHSATTWSGQYVGGAEAR.I    |        |
| 4552 | 3 | 3.939 | 0.367 | 26/72 | SAV_STRAV          | 0  | R.NAHSATTWSGQYVGGAEAR.I    |        |
| 7559 | 3 | 3.937 | 0.34  | 31/72 | SAV_STRAV          | 0  | R.NAHSATTWSGQYVGGAEAR.I    |        |
| 5994 | 3 | 3.929 | 0.361 | 30/72 | SAV_STRAV          | 0  | R.NAHSATTWSGQYVGGAEAR.I    |        |
| 5030 | 3 | 3.902 | 0.294 | 25/72 | SAV_STRAV          | 0  | R.NAHSATTWSGQYVGGAEAR.I    |        |
| 4216 | 2 | 3.892 | 0.472 | 17/24 | P35659_DEK_HUMAN   | 2  | K.LLASANLEEVTK.Q           | DEK    |
| 6912 | 3 | 3.892 | 0.263 | 25/80 | SAV1_STRVL         | 2  | R.YDSAPATDGSGLTALGWTVAWK.N |        |

|      |   |       |       |        |                     |    |                           |         |
|------|---|-------|-------|--------|---------------------|----|---------------------------|---------|
| 5128 | 3 | 3.864 | 0.378 | 30/72  | SAV_STRAV           | 0  | R.NAHSATTWSGQYVGGAEAR.I   |         |
| 3736 | 2 | 3.844 | 0.488 | 22/26  | Q15393_SF3B3_HUMAN  | 0  | R.TVLDPVTGDLSDTR.T        | SF3B3   |
| 3899 | 2 | 3.841 | 0.475 | 21/34  | Q15517_CDSN_HUMAN   | 1  | K.GSPGVPSFAAGPPISEGK.Y    | CDSN    |
| 5034 | 3 | 3.832 | 0.309 | 24/72  | SAV_STRAV           | 0  | R.NAHSATTWSGQYVGGAEAR.I   |         |
| 5084 | 2 | 3.778 | 0.144 | 17/36  | J3KS37_J3KS37_HUMAN | 0  | -.KGSC#PFQTATELMTTRIR.E   | RECQL5  |
| 3943 | 2 | 3.756 | 0.297 | 21/24  | P10599_THIO_HUMAN   | 0  | K.TAFQEALDAAGDK.L         | TXN     |
| 3690 | 3 | 3.732 | 0.298 | 29/72  | SAV_STRAV           | 0  | R.NAHSATTWSGQYVGGAEAR.I   |         |
| 4358 | 3 | 3.73  | 0.365 | 28/72  | SAV_STRAV           | 0  | R.NAHSATTWSGQYVGGAEAR.I   |         |
| 6730 | 3 | 3.726 | 0.371 | 32/72  | SAV_STRAV           | 0  | R.NAHSATTWSGQYVGGAEAR.I   |         |
| 3881 | 3 | 3.708 | 0.276 | 26/72  | SAV_STRAV           | 0  | R.NAHSATTWSGQYVGGAEAR.I   |         |
| 4169 | 3 | 3.691 | 0.429 | 27/72  | SAV_STRAV           | 0  | R.NAHSATTWSGQYVGGAEAR.I   |         |
| 6636 | 2 | 3.681 | 0.586 | 19/40  | SAV1_STRVL          | 2  | R.YDSAPATDGSQTALGWTVAWK.N |         |
| 3768 | 2 | 3.678 | 0.495 | 20/26  | Q15393_SF3B3_HUMAN  | 0  | R.TVLDPVTGDLSDTR.T        | SF3B3   |
| 3786 | 3 | 3.667 | 0.357 | 25/72  | SAV_STRAV           | 0  | R.NAHSATTWSGQYVGGAEAR.I   |         |
| 6853 | 2 | 3.661 | 0.521 | 17/36  | SAV_STRAV           | 0  | R.NAHSATTWSGQYVGGAEAR.I   |         |
| 3327 | 3 | 3.655 | 0.333 | 25/72  | SAV_STRAV           | 0  | R.NAHSATTWSGQYVGGAEAR.I   |         |
| 6614 | 3 | 3.648 | 0.288 | 26/80  | SAV1_STRVL          | 2  | R.YDSAPATDGSQTALGWTVAWK.N |         |
| 3590 | 3 | 3.599 | 0.34  | 26/72  | SAV_STRAV           | 0  | R.NAHSATTWSGQYVGGAEAR.I   |         |
| 3797 | 2 | 3.586 | 0.389 | 18/28  | P04406_G3P_HUMAN    | 1  | R.GALQNIIPASTGAAK.A       | GAPDH   |
| 3167 | 2 | 3.582 | 0.416 | 16/30  | Q6N021_TET2_HUMAN   | 1  | K.VSDVDFGVSVEAQEEK.K      | TET2    |
| 2980 | 3 | 3.571 | 0.459 | 24/72  | P35579_MYH9_HUMAN   | 0  | R.QAQQERDELADEIANSSGK.G   | MYH9    |
| 3028 | 2 | 3.55  | 0.365 | 17/18  | P35659_DEK_HUMAN    | 1  | R.LTMQVSSLQR.E            | DEK     |
| 6341 | 2 | 3.541 | 0.498 | 20/34  | SAV1_STRVL          | 1  | R.INTQWLLTSGTTEANAWK.S    |         |
| 7165 | 2 | 3.537 | 0.548 | 19/40  | SAV1_STRVL          | 2  | R.YDSAPATDGSQTALGWTVAWK.N |         |
| 5086 | 2 | 3.532 | 0.498 | 19/22  | P35659_DEK_HUMAN    | 3  | K.NVGQFSGFPFEK.G          | DEK     |
| 7399 | 2 | 3.532 | 0.511 | 19/40  | SAV1_STRVL          | 2  | R.YDSAPATDGSQTALGWTVAWK.N |         |
| 4486 | 3 | 3.513 | 0.31  | 24/56  | Q99873_ANM1_HUMAN   | 4  | K.DVAIKEPLVDVDPK.Q        | PRMT1   |
| 1689 | 2 | 3.491 | 0.269 | 15/18  | P07355_ANXA2_HUMAN  | 13 | R.TNQLQEINR.V             | ANXA2   |
| 2990 | 3 | 3.476 | 0.373 | 25/72  | P35579_MYH9_HUMAN   | 0  | R.QAQQERDELADEIANSSGK.G   | MYH9    |
| 6473 | 3 | 3.427 | 0.293 | 27/72  | SAV_STRAV           | 0  | R.NAHSATTWSGQYVGGAEAR.I   |         |
| 7945 | 3 | 3.389 | 0.34  | 25/72  | SAV_STRAV           | 0  | R.NAHSATTWSGQYVGGAEAR.I   |         |
| 3466 | 3 | 3.385 | 0.413 | 25/72  | SAV_STRAV           | 0  | R.NAHSATTWSGQYVGGAEAR.I   |         |
| 3824 | 3 | 3.377 | 0.273 | 20/44  | Q15208_STK38_HUMAN  | 0  | R.DIKPDNLLDLSK.G          | STK38   |
| 6118 | 2 | 3.359 | 0.302 | 17/38  | P07477_TRY1_HUMAN   | 10 | R.LGEHNIEVLEGNEQFINAAK.I  | PRSS1   |
| 5220 | 3 | 3.298 | 0.395 | 24/72  | SAV_STRAV           | 0  | R.NAHSATTWSGQYVGGAEAR.I   |         |
| 5823 | 3 | 3.293 | 0.331 | 27/68  | Q9H9A7_RMI1_HUMAN   | 0  | K.AMVLALQDVNMEHLENL.K.K   | RMI1    |
| 5062 | 2 | 3.27  | 0.471 | 16/22  | P35659_DEK_HUMAN    | 3  | K.NVGQFSGFPFEK.G          | DEK     |
| 6180 | 3 | 3.256 | 0.34  | 25/68  | SAV1_STRVL          | 1  | R.INTQWLLTSGTTEANAWK.S    |         |
| 2875 | 2 | 3.229 | 0.395 | 18/22  | P11021_GRP78_HUMAN  | 0  | R.TWNDPSVQQDIK.F          | HSPA5   |
| 5245 | 2 | 3.222 | 0.135 | 15/34  | Q13332_PTPRS_HUMAN  | 2  | R.EDQLPSGFPNIDM*GPQLK.V   | PTPRS   |
| 4855 | 2 | 3.208 | 0.2   | 15/30  | Q5TAX3_TUT4_HUMAN   | 2  | R.M*DDFQLKGIVEEKFK.W      | ZCCHC11 |
| 3995 | 2 | 3.19  | 0.439 | 15/36  | SAV_STRAV           | 0  | R.NAHSATTWSGQYVGGAEAR.I   |         |
| 4027 | 2 | 3.183 | 0.224 | 15/28  | P04350_TBB4A_HUMAN  | 9  | R.AVLVDLEPGTM*DSVR.S      | TUBB4A  |
| 1240 | 2 | 3.175 | 0.33  | 16/18  | P62736_ACTA_HUMAN   | 27 | K.AGFAGDDAPR.A            | ACTA2   |
| 2185 | 3 | 3.161 | 0.338 | 18/60  | IGH1M_MOUSE         | 0  | K.APQVYTIPPPKEQM*AK.D     | Ighg1   |
| 778  | 2 | 3.145 | 0.413 | 17/20  | P62736_ACTA_HUMAN   | 21 | K.DSYVGDEAQSK.R           | ACTA2   |
| 4654 | 3 | 3.136 | 0.086 | 27/72  | SAV_STRAV           | 0  | R.NAHSATTWSGQYVGGAEAR.I   |         |
| 6883 | 2 | 3.12  | 0.187 | 17/22  | Q9H9A7_RMI1_HUMAN   | 2  | K.QVFEQWLLTDLR.D          | RMI1    |
| 5322 | 3 | 3.075 | 0.308 | 27/72  | SAV_STRAV           | 0  | R.NAHSATTWSGQYVGGAEAR.I   |         |
| 4293 | 2 | 3.073 | 0.27  | 14/24  | P21333_FLNA_HUMAN   | 4  | R.IANLQTDLSDGLR.L         | FLNA    |
| 4163 | 2 | 3.072 | 0.314 | 17/20  | P11021_GRP78_HUMAN  | 0  | R.NELESYAYS.LK.N          | HSPA5   |
| 3946 | 3 | 3.062 | 0.167 | 22/60  | P62736_ACTA_HUMAN   | 7  | K.YPIEHGIITNWDDM*EK.I     | ACTA2   |
| 5982 | 2 | 3.024 | 0.502 | 17/28  | P07437_TBB5_HUMAN   | 2  | R.ALTVPELTQQVFDK.N        | TUBB    |
| 3042 | 2 | 3.023 | 0.446 | 15/22  | IGH1M_MOUSE         | 0  | R.VNSAAFPAPIEK.T          | Ighg1   |
| 4382 | 2 | 3.021 | 0.358 | 18/30  | P62987_RL40_HUMAN   | 22 | K.TITLEVEPSDTIENVK.A      | UBA52   |
| 3982 | 2 | 3.01  | 0.237 | 15/24  | O15294_OGT1_HUMAN   | 0  | K.DSGNIPEAIASR.T          | OGT     |
| 4646 | 2 | 3.009 | 0.505 | 15/18  | IGH1M_MOUSE         | 0  | K.DVLTITLTPK.V            | Ighg1   |
| 2280 | 2 | 3.002 | 0.494 | 15/18  | P60709_ACTB_HUMAN   | 4  | R.GYSFTTTER.E             | ACTB    |
| 1382 | 2 | 2.989 | 0.296 | 14/16  | P35659_DEK_HUMAN    | 3  | R.SGVNSELVK.R             | DEK     |
| 6630 | 2 | 2.988 | 0.525 | 15/36  | SAV_STRAV           | 0  | R.NAHSATTWSGQYVGGAEAR.I   |         |
| 1165 | 2 | 2.975 | 0.223 | 16/20  | P35579_MYH9_HUMAN   | 0  | R.QLEEEAEEEAQR.A          | MYH9    |
| 3487 | 2 | 2.954 | 0.542 | 18/24  | P34931_HS71L_HUMAN  | 14 | R.TTPSYVAFTDTER.L         | HSPA1L  |
| 6002 | 2 | 2.932 | 0.238 | 18/38  | P07477_TRY1_HUMAN   | 10 | R.LGEHNIEVLEGNEQFINAAK.I  | PRSS1   |
| 2361 | 2 | 2.912 | 0.184 | 14/22  | Q16526_CRY1_HUMAN   | 0  | K.LSIEYDSEPFGEK.E         | CRY1    |
| 7061 | 2 | 2.911 | 0.145 | 15/34  | SAV1_STRVL          | 1  | R.INTQWLLTSGTTEANAWK.S    |         |
| 5853 | 2 | 2.888 | 0.42  | 14/20  | P05186_PPBT_HUMAN   | 0  | R.LDGLDLVDTWK.S           | ALPL    |
| 6749 | 2 | 2.885 | 0.437 | 15/36  | SAV_STRAV           | 0  | R.NAHSATTWSGQYVGGAEAR.I   |         |
| 4595 | 2 | 2.881 | 0.195 | 14/36  | Q8NEP3_DAAF1_HUMAN  | 0  | K.ETFC#IDDLDPDLEDDDETGK.S | DNAAF1  |
| 3903 | 2 | 2.878 | 0.426 | 15/20  | Q99873_ANM1_HUMAN   | 6  | R.ATLYVTAIEDR.Q           | PRMT1   |
| 4919 | 2 | 2.806 | 0.204 | 13/22  | Q96QU1_PCD15_HUMAN  | 21 | R.NGTILVDNM*LIK.G         | PCDH15  |
| 3035 | 2 | 2.798 | 0.346 | 14/16  | P07355_ANXA2_HUMAN  | 13 | R.QDIAFAYQR.R             | ANXA2   |
| 4480 | 2 | 2.792 | 0.157 | 28-Dec | Q92665_RT31_HUMAN   | 0  | K.ETSESQDSEKENTKK.D       | MRPS31  |
| 4763 | 2 | 2.79  | 0.21  | 15/30  | Q5TAX3_TUT4_HUMAN   | 2  | R.M*DDFQLKGIVEEKFK.W      | ZCCHC11 |
| 5733 | 2 | 2.775 | 0.278 | 26-Nov | Q13885_TBB2A_HUMAN  | 10 | K.NSSYFVEWIPNVK.T         | TUBB2A  |
| 4059 | 2 | 2.772 | 0.176 | 15/20  | P38646_GRP75_HUMAN  | 0  | K.VQQTVDLDFGR.A           | HSPA9   |
| 4666 | 2 | 2.745 | 0.118 | 15/18  | P07477_TRY1_HUMAN   | 4  | K.TLNDIMLIK.L             | PRSS1   |

|      |   |       |       |        |                    |    |                            |          |
|------|---|-------|-------|--------|--------------------|----|----------------------------|----------|
| 6831 | 2 | 2.735 | 0.378 | 14/34  | SAV1_STRVL         | 1  | R.INTQWLLTSGTTEANAWK.S     |          |
| 6290 | 2 | 2.727 | 0.301 | 15/34  | SAV1_STRVL         | 1  | R.INTQWLLTSGTTEANAWK.S     |          |
| 3094 | 2 | 2.726 | 0.097 | 16/18  | Q71U36_TBA1A_HUMAN | 5  | K.DVNAAIATIK.T             | TUBA1A   |
| 6060 | 2 | 2.723 | 0.387 | 14/36  | SAV_STRAV          | 0  | R.NAHSATTWSGQYVGGAEAR.I    |          |
| 5515 | 2 | 2.704 | 0.339 | 14/16  | Q71U36_TBA1A_HUMAN | 7  | K.EIIDLVLDL.R              | TUBA1A   |
| 7071 | 2 | 2.702 | 0.434 | 20/40  | SAV1_STRVL         | 2  | R.YDSAPATDGSGLTALGWTVAWK.N |          |
| 1543 | 2 | 2.699 | 0.245 | 18-Nov | Q15294_OGT1_HUMAN  | 0  | R.EQGNIEAVR.L              | OGT      |
| 3605 | 2 | 2.61  | 0.126 | 15/22  | P10809_CH60_HUMAN  | 5  | R.TVIIQSWGSPK.V            | HSPD1    |
| 2512 | 2 | 2.609 | 0.416 | 14/22  | P07437_TBB5_HUMAN  | 1  | R.ISVYYNEATGGK.Y           | TUBB     |
| 1863 | 2 | 2.58  | 0.225 | 16/20  | SAV1_STRVL         | 2  | K.STLVGHDTFTK.V            |          |
| 6228 | 2 | 2.569 | 0.392 | 15/36  | SAV_STRAV          | 0  | R.NAHSATTWSGQYVGGAEAR.I    |          |
| 4804 | 2 | 2.552 | 0.089 | 15/38  | P07477_TRY1_HUMAN  | 10 | R.LGEHNIEVLEQNEQFINAAK.I   | PRSS1    |
| 3522 | 2 | 2.522 | 0.384 | 17/26  | P38646_GRP75_HUMAN | 2  | R.TTPSVVAVFTADGR.L         | HSPA9    |
| 3951 | 2 | 2.521 | 0.209 | 13/26  | P11021_GRP78_HUMAN | 0  | R.ITPSYVAVFTPEGER.L        | HSPA5    |
| 5182 | 2 | 2.511 | 0.424 | 15/22  | P35659_DEK_HUMAN   | 3  | K.NVGFQSGFPFEK.G           | DEK      |
| 6725 | 2 | 2.506 | 0.445 | 16/40  | SAV1_STRVL         | 2  | R.YDSAPATDGSGLTALGWTVAWK.N |          |
| 4713 | 2 | 2.5   | 0.145 | 14/28  | Q86YV6_MYLK4_HUMAN | 0  | K.VKCFLEKNSGDQDSR.S        | MYLK4    |
| 7750 | 2 | 2.444 | 0.388 | Dec-34 | SAV1_STRVL         | 1  | R.INTQWLLTSGTTEANAWK.S     |          |
| 3621 | 2 | 2.409 | 0.192 | 14/16  | P02545_LMNA_HUMAN  | 3  | R.LADALQELR.A              | LMNA     |
| 7133 | 2 | 2.403 | 0.497 | 16/36  | SAV_STRAV          | 0  | R.NAHSATTWSGQYVGGAEAR.I    |          |
| 1151 | 2 | 2.388 | 0.294 | 14/16  | P10809_CH60_HUMAN  | 0  | R.VTDALNATR.A              | HSPD1    |
| 2860 | 2 | 2.388 | 0.086 | 15/22  | P11021_GRP78_HUMAN | 0  | R.TWNDPSVQQDIK.F           | HSPA5    |
| 1365 | 2 | 2.371 | 0.239 | 16-Nov | P35579_MYH9_HUMAN  | 0  | K.VAAYDKLEK.T              | MYH9     |
| 2706 | 2 | 2.364 | 0.389 | 13/20  | IGH1M_MOUSE        | 0  | K.APQVYTIPIPK.E            | Ighg1    |
| 3795 | 2 | 2.346 | 0.167 | 14/22  | Q01804_OTUD4_HUMAN | 0  | R.ESNYFGLSPEER.R           | OTUD4    |
| 2543 | 2 | 2.343 | 0.294 | 14/18  | Q15208_STK38_HUMAN | 0  | R.IGAPGVVEIK.S             | STK38    |
| 408  | 2 | 2.331 | 0.242 | 13/20  | P62736_ACTA_HUMAN  | 22 | R.HQGVV*VGM*GQK.D          | ACTA2    |
| 4005 | 2 | 2.325 | 0.138 | 18-Nov | Q8NEP3_DAAF1_HUMAN | 1  | R.KIENLEPLQK.L             | DNAAF1   |
| 1216 | 2 | 2.3   | 0.17  | 13/18  | P62736_ACTA_HUMAN  | 27 | K.AGFAGDDAPR.A             | ACTA2    |
| 1797 | 2 | 2.298 | 0.223 | 14-Nov | Q15208_STK38_HUMAN | 0  | K.RFEGLTAR.G               | STK38    |
| 4372 | 2 | 2.289 | 0.154 | 30-Nov | Q12965_MYO1E_HUMAN | 1  | K.VFIKAPESLFLLEEMR.E       | MYO1E    |
| 3769 | 2 | 2.279 | 0.264 | 14-Dec | P62736_ACTA_HUMAN  | 9  | R.DLTDYLM*K.I              | ACTA2    |
| 2013 | 2 | 2.256 | 0.235 | 20-Dec | P62736_ACTA_HUMAN  | 6  | K.EITALAPSTM*K.I           | ACTA2    |
| 3059 | 2 | 2.254 | 0.229 | 19/24  | P68871_HBB_HUMAN   | 1  | K.VNVDEVGGEALGR.L          | HBB      |
| 2149 | 2 | 2.187 | 0.335 | 16-Dec | P35579_MYH9_HUMAN  | 0  | K.ASITALEAK.I              | MYH9     |
| 6969 | 2 | 2.166 | 0.266 | 14/36  | SAV_STRAV          | 0  | R.NAHSATTWSGQYVGGAEAR.I    |          |
| 3064 | 2 | 2.088 | 0.27  | 15/22  | P11021_GRP78_HUMAN | 0  | K.DAGTIAGLNVM*R.I          | HSPA5    |
| 3566 | 2 | 2.035 | 0.112 | 13/20  | P62736_ACTA_HUMAN  | 26 | R.AVFPSIVGRPR.H            | ACTA2    |
| 3987 | 2 | 2.033 | 0.219 | 14/20  | Q15294_OGT1_HUMAN  | 0  | K.LVSIVADQLEK.N            | OGT      |
| 3782 | 2 | 2.026 | 0.277 | 14-Dec | P62736_ACTA_HUMAN  | 9  | R.DLTDYLM*K.I              | ACTA2    |
| 3686 | 2 | 1.986 | 0.232 | 14/20  | P07355_ANXA2_HUMAN | 11 | K.DIIDSTSGDFR.K            | ANXA2    |
| 5894 | 2 | 1.972 | 0.131 | Oct-36 | SAV_STRAV          | 0  | R.NAHSATTWSGQYVGGAEAR.I    |          |
| 1016 | 2 | 1.966 | 0.278 | 16-Oct | P11021_GRP78_HUMAN | 0  | K.ITITNDQNR.L              | HSPA5    |
| 3904 | 2 | 1.957 | 0.245 | 14/20  | Q99873_ANM1_HUMAN  | 6  | R.ATLYVTAIEDR.Q            | PRMT1    |
| 4056 | 2 | 1.955 | 0.087 | 18-Dec | P07477_TRY1_HUMAN  | 4  | K.TLNNDIM*LIK.L            | PRSS1    |
| 4963 | 2 | 1.945 | 0.112 | 26-Oct | P11021_GRP78_HUMAN | 0  | K.TFAPEEISAM*VLTK.M        | HSPA5    |
| 3142 | 2 | 1.934 | 0.129 | 13/24  | P35030_TRY3_HUMAN  | 1  | K.VLEGNEQFINAAK.I          | PRSS3    |
| 2300 | 2 | 1.91  | 0.139 | 16-Sep | Q15233_NONO_HUMAN  | 3  | K.VELDNM*PLR.G             | NONO     |
| 400  | 2 | 1.885 | 0.112 | 18-Nov | P38646_GRP75_HUMAN | 0  | R.KDSETGENIR.Q             | HSPA9    |
| 1331 | 2 | 1.852 | 0.154 | 18-Sep | P35579_MYH9_HUMAN  | 0  | R.ALEQQVEEM*K.T            | MYH9     |
| 1883 | 2 | 1.835 | 0.246 | 14-Oct | P67870_CSK2B_HUMAN | 3  | R.GIAQM*LEK.Y              | CSNK2B   |
| 2349 | 2 | 1.835 | 0.066 | 16-Oct | Q15393_SF3B3_HUMAN | 0  | R.AVM*ISAIEK.Q             | SF3B3    |
| 2467 | 2 | 1.832 | 0.28  | 16-Sep | P35659_DEK_HUMAN   | 2  | R.EPFTIAQGGK.G             | DEK      |
| 2317 | 2 | 1.816 | 0.114 | 16-Sep | Q15233_NONO_HUMAN  | 3  | K.VELDNM*PLR.G             | NONO     |
| 2550 | 2 | 1.8   | 0.071 | Sep-36 | Q00839_HNRPU_HUMAN | 0  | K.YNILGTNTIMDKM*MVAGFK.K   | HNRNPU   |
| 6739 | 2 | 1.77  | 0.198 | Dec-32 | Q9H9A7_RMI1_HUMAN  | 2  | K.VLGGVEVDALLEEYAEK.V      | RMI1     |
| 7293 | 2 | 1.761 | 0.326 | 13/40  | SAV1_STRVL         | 2  | R.YDSAPATDGSGLTALGWTVAWK.N |          |
| 1836 | 2 | 1.749 | 0.133 | 16-Nov | Q6N021_TET2_HUMAN  | 1  | K.YGPDYVPQK.S              | TET2     |
| 6645 | 2 | 1.748 | 0.246 | 16/40  | SAV1_STRVL         | 2  | R.YDSAPATDGSGLTALGWTVAWK.N |          |
| 4029 | 2 | 1.722 | 0.056 | 12-Sep | P35659_DEK_HUMAN   | 3  | R.IHFFLSK.K                | DEK      |
| 3380 | 2 | 1.714 | 0.053 | 13/22  | P49411_EFTU_HUMAN  | 0  | R.AEAGDNLGALVR.G           | TUFM     |
| 4221 | 2 | 1.708 | 0.12  | 24-Aug | P06748_NPM_HUMAN   | 0  | K.MQASIEKGGSLPK.V          | NPM1     |
| 2998 | 2 | 1.662 | 0.203 | 14-Nov | Q01804_OTUD4_HUMAN | 0  | R.LLYEIQNR.D               | OTUD4    |
| 2266 | 2 | 1.639 | 0.06  | 22-Nov | Q5M9N0_CD158_HUMAN | 0  | R.SILVDFEEASGK.K           | CCDC158  |
| 3406 | 2 | 1.589 | 0.184 | 20-Oct | Q15294_OGT1_HUMAN  | 2  | R.GQLQEAIEHYR.H            | OGT      |
| 2082 | 2 | 1.575 | 0.156 | 13/20  | Q02539_H11_HUMAN   | 4  | K.ALAAAGYDVEK.N            | HIST1H1A |
| 3126 | 2 | 1.507 | 0.061 | 22-Oct | Q00839_HNRPU_HUMAN | 0  | K.YNILGTNTIMDK.M           | HNRNPU   |

HF-DEK TAP-MS Peptide List

| ScanF | z | ? XCorr | ?Corr | # Ions | Reference          | Redun | Peptide                                  | Gene Symbol |
|-------|---|---------|-------|--------|--------------------|-------|------------------------------------------|-------------|
| 7847  | 3 | 7.11    | 0.496 | 43/104 | P35579_MYH9_HUMAN  | 0     | R.ALEQQVEEM*KTQLEEELEDELQATEDAK.L        | MYH9        |
| 6008  | 3 | 6.982   | 0.251 | 37/84  | P60709_ACTB_HUMAN  | 1     | R.KDLYANTVLSGGTTMYPGIADR.M               | ACTB        |
| 7945  | 3 | 6.937   | 0.523 | 46/104 | P35579_MYH9_HUMAN  | 0     | R.ALEQQVEEM*KTQLEEELEDELQATEDAK.L        | MYH9        |
| 7145  | 3 | 6.82    | 0.549 | 34/84  | P19784_CSK22_HUMAN | 1     | R.EYWDYEAHVPSWGNQDDYQLVR.K               | CSNK2A2     |
| 7625  | 3 | 6.742   | 0.57  | 44/100 | P39023_RL3_HUMAN   | 4     | R.ERLEQQVPVNVQVFGQDEMIDVIGVTK.G          | RPL3        |
| 4236  | 3 | 6.721   | 0.524 | 38/88  | Q01804_OTUD4_HUMAN | 0     | K.RPEPSTLENITDDKYATVSSPSK.S              | OTUD4       |
| 7077  | 3 | 6.719   | 0.577 | 42/116 | P60709_ACTB_HUMAN  | 4     | R.TTGIVM*DSGDGVTHTVPIYEGYALPHAILR.L      | ACTB        |
| 7194  | 2 | 6.702   | 0.603 | 26/32  | P35580_MYH10_HUMAN | 3     | R.TQLEEELEDELQATEDAK.L                   | MYH10       |
| 7256  | 2 | 6.702   | 0.596 | 26/34  | P35579_MYH9_HUMAN  | 0     | K.LQVELDNVTGLLSQSDSK.S                   | MYH9        |
| 5309  | 3 | 6.621   | 0.549 | 39/84  | P60709_ACTB_HUMAN  | 1     | R.KDLYANTVLSGGTTM*YPGIADR.M              | ACTB        |
| 3219  | 3 | 6.618   | 0.582 | 42/128 | P05387_RLA2_HUMAN  | 1     | K.LASVPAGGAVAVSAAPGSAAPAAGSAPAAAE EK.K   | RPLP2       |
| 6979  | 2 | 6.533   | 0.603 | 27/38  | P68400_CSK21_HUMAN | 4     | R.FVHSENQHLVSPEALDFLDK.L                 | CSNK2A1     |
| 7341  | 2 | 6.518   | 0.147 | 28/34  | P35579_MYH9_HUMAN  | 0     | K.SM*EAEMIQLEELAAAER.A                   | MYH9        |
| 7378  | 3 | 6.509   | 0.654 | 45/104 | Q07021_C1QBP_HUMAN | 2     | K.ALVLDC#HYPEDEVGQDEAEEDIFSIR.E          | C1QBP       |
| 8504  | 2 | 6.488   | 0.71  | 30/44  | P11142_HSP7C_HUMAN | 3     | K.SINPDEAVAYGAAVQAAILSGDK.S              | HSPA8       |
| 5931  | 2 | 6.479   | 0.667 | 27/34  | P35579_MYH9_HUMAN  | 0     | K.SM*EAEM*IQLEELAAAER.A                  | MYH9        |
| 6793  | 2 | 6.454   | 0.625 | 25/38  | P68400_CSK21_HUMAN | 4     | R.FVHSENQHLVSPEALDFLDK.L                 | CSNK2A1     |
| 7353  | 3 | 6.437   | 0.592 | 38/84  | P68400_CSK21_HUMAN | 5     | R.EYWDYESHVVEWGNQDDYQLVR.K               | CSNK2A1     |
| 8496  | 3 | 6.404   | 0.607 | 39/88  | P11142_HSP7C_HUMAN | 3     | K.SINPDEAVAYGAAVQAAILSGDK.S              | HSPA8       |
| 7418  | 3 | 6.378   | 0.583 | 39/108 | P06748_NPM_HUMAN   | 0     | R.TVSLGAGAKDELHIVEAEAM*NYEGSPIK.V        | NPM1        |
| 4795  | 2 | 6.335   | 0.541 | 23/32  | P68400_CSK21_HUMAN | 5     | R.GKYSEVFEAINITNNEK.V                    | CSNK2A1     |
| 6889  | 2 | 6.334   | 0.61  | 27/38  | P68400_CSK21_HUMAN | 4     | R.FVHSENQHLVSPEALDFLDK.L                 | CSNK2A1     |
| 6486  | 2 | 6.289   | 0.55  | 25/28  | P68400_CSK21_HUMAN | 5     | K.YSEVFEAINITNNEK.V                      | CSNK2A1     |
| 6464  | 3 | 6.277   | 0.487 | 32/72  | P35579_MYH9_HUMAN  | 0     | K.M*QQNIQEELEEEESAR.Q                    | MYH9        |
| 7398  | 3 | 6.274   | 0.602 | 46/136 | P05388_RLA0_HUMAN  | 2     | K.AFLADPSAFVAAAPVAAATTAAPAAAAAPAKV EAK.E | RPLP0       |
| 6058  | 2 | 6.267   | 0.526 | 26/32  | P68400_CSK21_HUMAN | 5     | R.GKYSEVFEAINITNNEK.V                    | CSNK2A1     |
| 5705  | 3 | 6.239   | 0.468 | 36/84  | P68400_CSK21_HUMAN | 5     | R.EYWDYESHVVEWGNQDDYQLVR.K               | CSNK2A1     |
| 7128  | 3 | 6.226   | 0.555 | 38/88  | P67870_CSK2B_HUMAN | 2     | R.VYC#ENQPM*LPGLSDIPGEAM*VK.L            | CSNK2B      |
| 6890  | 3 | 6.183   | 0.489 | 37/72  | P04908_H2A1B_HUMAN | 10    | R.VTIAQGGVLPNIQAVLLPK.K                  | HIST1H2AB   |
| 5796  | 2 | 6.169   | 0.553 | 25/34  | SAV1_STRVL         | 1     | R.INTQWLLTSGTTEANAWK.S                   |             |
| 8731  | 2 | 6.146   | 0.526 | 24/28  | P68400_CSK21_HUMAN | 5     | K.YSEVFEAINITNNEK.V                      | CSNK2A1     |
| 3154  | 2 | 6.138   | 0.69  | 29/36  | SAV_STRAV          | 0     | R.NAHSATTWSGQYVGGAEAR.I                  |             |
| 8056  | 2 | 6.132   | 0.624 | 27/38  | P35579_MYH9_HUMAN  | 0     | R.IIGLDQVAGMSETALPGAFK.T                 | MYH9        |
| 8682  | 3 | 6.126   | 0.33  | 37/92  | P35579_MYH9_HUMAN  | 0     | R.KLEGDSTDLSDQIAELQAIAELK.M              | MYH9        |
| 5765  | 2 | 6.124   | 0.58  | 25/34  | P35579_MYH9_HUMAN  | 0     | K.LQVELDNVTGLLSQSDSK.S                   | MYH9        |
| 8517  | 2 | 6.084   | 0.535 | 24/34  | P35579_MYH9_HUMAN  | 0     | K.SMEAEMIQLEELAAAER.A                    | MYH9        |
| 6282  | 2 | 6.076   | 0.503 | 23/28  | P68400_CSK21_HUMAN | 5     | K.YSEVFEAINITNNEK.V                      | CSNK2A1     |
| 6136  | 2 | 6.039   | 0.571 | 25/40  | P60709_ACTB_HUMAN  | 1     | K.DLYANTVLSGGTTM*YPGIADR.M               | ACTB        |
| 7450  | 3 | 6.023   | 0.434 | 37/84  | P68400_CSK21_HUMAN | 5     | R.EYWDYESHVVEWGNQDDYQLVR.K               | CSNK2A1     |
| 7131  | 3 | 6.021   | 0.517 | 34/84  | P68400_CSK21_HUMAN | 5     | R.EYWDYESHVVEWGNQDDYQLVR.K               | CSNK2A1     |
| 5967  | 3 | 6.017   | 0.597 | 37/76  | P12268_IMDH2_HUMAN | 1     | R.RFGVPIADGGIQNVGHIAK.A                  | IMPDH2      |
| 7993  | 2 | 6.008   | 0.517 | 24/28  | P19784_CSK22_HUMAN | 2     | K.TPALVFEYINNTDFK.Q                      | CSNK2A2     |
| 6338  | 2 | 6.006   | 0.503 | 23/30  | P35579_MYH9_HUMAN  | 0     | K.ANLQIDQINTDLNLER.S                     | MYH9        |
| 6451  | 2 | 6.005   | 0.522 | 26/36  | P35579_MYH9_HUMAN  | 0     | K.M*QQNIQEELEEEESAR.Q                    | MYH9        |
| 5786  | 2 | 6.001   | 0.629 | 28/40  | SAV1_STRVL         | 2     | R.YDSAPATDGGSGTALGWTVAWK.N               |             |
| 6198  | 2 | 5.998   | 0.593 | 26/32  | P19784_CSK22_HUMAN | 1     | R.GKYSEVFEAINITNNER.V                    | CSNK2A2     |
| 7228  | 2 | 5.983   | 0.617 | 29/40  | SAV1_STRVL         | 2     | R.YDSAPATDGGSGTALGWTVAWK.N               |             |
| 5258  | 3 | 5.981   | 0.194 | 33/76  | P07477_TRY1_HUMAN  | 10    | R.LGEHNIEVLEGNEQFINAAK.I                 | PRSS1       |
| 8062  | 2 | 5.847   | 0.663 | 28/38  | P35579_MYH9_HUMAN  | 0     | R.IIGLDQVAGMSETALPGAFK.T                 | MYH9        |
| 6377  | 2 | 5.837   | 0.466 | 25/28  | P68400_CSK21_HUMAN | 5     | K.YSEVFEAINITNNEK.V                      | CSNK2A1     |
| 9048  | 2 | 5.834   | 0.62  | 27/40  | SAV1_STRVL         | 2     | R.YDSAPATDGGSGTALGWTVAWK.N               |             |
| 6948  | 2 | 5.83    | 0.458 | 26/40  | P60709_ACTB_HUMAN  | 1     | K.DLYANTVLSGGTTMYPGIADR.M                | ACTB        |
| 5626  | 3 | 5.82    | 0.57  | 33/64  | P35579_MYH9_HUMAN  | 0     | K.HSQAVEELAEQLEQTKR.V                    | MYH9        |
| 7853  | 3 | 5.818   | 0.459 | 36/108 | P06748_NPM_HUMAN   | 0     | R.TVSLGAGAKDELHIVEAEAMNYEGSPIK.V         | NPM1        |
| 2534  | 2 | 5.802   | 0.622 | 29/36  | SAV_STRAV          | 0     | R.NAHSATTWSGQYVGGAEAR.I                  |             |
| 5693  | 2 | 5.798   | 0.488 | 26/32  | P35579_MYH9_HUMAN  | 0     | K.KANLQIDQINTDLNLER.S                    | MYH9        |
| 7358  | 3 | 5.785   | 0.463 | 39/104 | Q07021_C1QBP_HUMAN | 2     | K.ALVLDC#HYPEDEVGQDEAEEDIFSIR.E          | C1QBP       |
| 5782  | 2 | 5.769   | 0.65  | 31/40  | SAV1_STRVL         | 2     | R.YDSAPATDGGSGTALGWTVAWK.N               |             |
| 7640  | 3 | 5.739   | 0.511 | 32/84  | P68400_CSK21_HUMAN | 5     | R.EYWDYESHVVEWGNQDDYQLVR.K               | CSNK2A1     |
| 6852  | 2 | 5.734   | 0.47  | 27/40  | P60709_ACTB_HUMAN  | 1     | K.DLYANTVLSGGTTMYPGIADR.M                | ACTB        |
| 8186  | 3 | 5.726   | 0.498 | 32/60  | P35749_MYH11_HUMAN | 4     | K.QLLQANPILEAFGNAK.T                     | MYH11       |
| 6600  | 2 | 5.725   | 0.494 | 24/28  | P35579_MYH9_HUMAN  | 0     | R.LTEMETLQSQLMAEK.L                      | MYH9        |
| 6460  | 2 | 5.699   | 0.525 | 26/36  | P35579_MYH9_HUMAN  | 0     | K.M*QQNIQEELEEEESAR.Q                    | MYH9        |
| 6310  | 3 | 5.697   | 0.434 | 33/80  | P35579_MYH9_HUMAN  | 0     | R.IAQLEEELEEEQGNETLINDR.L                | MYH9        |
| 6352  | 2 | 5.694   | 0.546 | 25/30  | P35579_MYH9_HUMAN  | 0     | K.ANLQIDQINTDLNLER.S                     | MYH9        |
| 5694  | 2 | 5.683   | 0.676 | 29/40  | SAV1_STRVL         | 2     | R.YDSAPATDGGSGTALGWTVAWK.N               |             |
| 7070  | 2 | 5.671   | 0.615 | 27/38  | P35579_MYH9_HUMAN  | 0     | R.IIGLDQVAGM*SETALPGAFK.T                | MYH9        |
| 7244  | 2 | 5.664   | 0.495 | 24/32  | P35579_MYH9_HUMAN  | 0     | R.ELESQISELQEDLESER.A                    | MYH9        |
| 8270  | 3 | 5.663   | 0.483 | 36/76  | P68400_CSK21_HUMAN | 4     | R.FVHSENQHLVSPEALDFLDK.L                 | CSNK2A1     |
| 8310  | 3 | 5.643   | 0.474 | 36/80  | P35579_MYH9_HUMAN  | 0     | K.DFSALESQLQDTQELLQEENR.Q                | MYH9        |
| 7754  | 2 | 5.633   | 0.481 | 24/34  | P68400_CSK21_HUMAN | 3     | R.GGPNITLADIVKDPVSR.T                    | CSNK2A1     |
| 5801  | 3 | 5.633   | 0.379 | 38/84  | P68400_CSK21_HUMAN | 5     | R.EYWDYESHVVEWGNQDDYQLVR.K               | CSNK2A1     |
| 8361  | 3 | 5.631   | 0.453 | 36/76  | P68400_CSK21_HUMAN | 4     | R.FVHSENQHLVSPEALDFLDK.L                 | CSNK2A1     |
| 6167  | 2 | 5.629   | 0.63  | 25/40  | P60709_ACTB_HUMAN  | 1     | K.DLYANTVLSGGTTM*YPGIADR.M               | ACTB        |
| 6356  | 2 | 5.621   | 0.534 | 23/28  | P19784_CSK22_HUMAN | 1     | K.YSEVFEAINITNNER.V                      | CSNK2A2     |

|      |   |       |       |        |                     |    |                                     |         |
|------|---|-------|-------|--------|---------------------|----|-------------------------------------|---------|
| 7026 | 3 | 5.619 | 0.382 | 35/92  | P11142_HSP7C_HUMAN  | 4  | K.QTQTFTTYSDNQPGVLIIQVYEGEER.A      | HSPA8   |
| 7208 | 2 | 5.605 | 0.529 | 23/34  | P35659_DEK_HUMAN    | 3  | K.NVGFQFSGFPFEKGSVQYK.K             | DEK     |
| 8547 | 2 | 5.569 | 0.542 | 24/28  | P68400_CSK21_HUMAN  | 5  | K.YSEVFEAINITNNEK.V                 | CSNK2A1 |
| 6261 | 2 | 5.553 | 0.511 | 27/32  | P68400_CSK21_HUMAN  | 5  | R.GKYSEVFEAINITNNEK.V               | CSNK2A1 |
| 5418 | 2 | 5.529 | 0.471 | 24/28  | P68400_CSK21_HUMAN  | 3  | R.TPALVFEHVNTDFK.Q                  | CSNK2A1 |
| 3330 | 2 | 5.526 | 0.408 | 22/26  | P35659_DEK_HUMAN    | 2  | K.KLLASANLEEVTM*K.Q                 | DEK     |
| 4905 | 2 | 5.5   | 0.469 | 25/28  | P68400_CSK21_HUMAN  | 5  | K.YSEVFEAINITNNEK.V                 | CSNK2A1 |
| 340  | 2 | 5.499 | 0.524 | 23/28  | P35749_MYH11_HUMAN  | 2  | R.NTDQASM*PDNTAAQK.V                | MYH11   |
| 5574 | 2 | 5.492 | 0.587 | 23/34  | P19105_ML12A_HUMAN  | 4  | R.ATSNVAM*FDQSQIQEFK.E              | MYL12A  |
| 7347 | 2 | 5.481 | 0.35  | 24/34  | SAV1_STRVL          | 1  | R.INTQWLLTSGTTEANAWK.S              |         |
| 7065 | 2 | 5.47  | 0.539 | 22/38  | P35579_MYH9_HUMAN   | 0  | R.IIGLDQVAGM*SETALPGAFK.T           | MYH9    |
| 5320 | 2 | 5.462 | 0.482 | 24/32  | P67809_YBOX1_HUMAN  | 4  | R.SVGDGETVEFDVVEGEG.K               | YBX1    |
| 6583 | 2 | 5.454 | 0.441 | 25/28  | P68400_CSK21_HUMAN  | 5  | K.YSEVFEAINITNNEK.V                 | CSNK2A1 |
| 6005 | 3 | 5.453 | 0.368 | 32/76  | P35579_MYH9_HUMAN   | 0  | K.KM*QQNIQELEEQLLEEEESAR.Q          | MYH9    |
| 4024 | 2 | 5.452 | 0.613 | 23/40  | P11021_GRP78_HUMAN  | 0  | K.LYGSAGPPPTGEEDTAEKDEL.-           | HSPA5   |
| 9208 | 2 | 5.439 | 0.559 | 24/36  | SAV_STRAV           | 0  | R.NAHSATTWSGQYVGGAEAR.I             |         |
| 7574 | 3 | 5.436 | 0.6   | 38/120 | P05388_RLA0_HUMAN   | 2  | K.AFLADPSAFVAAAPVAAATTAAPAAAAAPAK.V | RPLP0   |
| 4117 | 2 | 5.433 | 0.439 | 22/28  | P35579_MYH9_HUMAN   | 0  | R.LTEM*ETLQSQLM*AEK.L               | MYH9    |
| 6713 | 2 | 5.431 | 0.447 | 25/28  | P68400_CSK21_HUMAN  | 5  | K.YSEVFEAINITNNEK.V                 | CSNK2A1 |
| 7870 | 2 | 5.428 | 0.507 | 25/32  | P05388_RLA0_HUMAN   | 4  | R.VLALSVETDYTFPLAEK.V               | RPLP0   |
| 7382 | 2 | 5.426 | 0.551 | 26/34  | SAV1_STRVL          | 1  | R.INTQWLLTSGTTEANAWK.S              |         |
| 7324 | 2 | 5.425 | 0.656 | 28/40  | SAV1_STRVL          | 2  | R.YDSAPATDGGSGTALGWTVAWK.N          |         |
| 3033 | 2 | 5.419 | 0.486 | 23/28  | Q04837_SSBP_HUMAN   | 2  | R.SGDSEVYQLGDVSOQK.T                | SSBP1   |
| 7419 | 2 | 5.402 | 0.577 | 26/36  | P35579_MYH9_HUMAN   | 0  | K.IRELESQISELQEDLESER.A             | MYH9    |
| 6909 | 2 | 5.397 | 0.673 | 26/38  | Q71U36_TBA1A_HUMAN  | 14 | K.TIGGGDDSFNTFFSETGAGK.H            | TUBA1A  |
| 7757 | 2 | 5.397 | 0.561 | 25/32  | P05388_RLA0_HUMAN   | 4  | R.VLALSVETDYTFPLAEK.V               | RPLP0   |
| 5733 | 2 | 5.396 | 0.467 | 22/30  | Q9UHB9_SRP68_HUMAN  | 0  | K.LASAFTEEQAVLYNQR.V                | SRP68   |
| 5735 | 2 | 5.392 | 0.522 | 22/28  | P35579_MYH9_HUMAN   | 0  | R.LTEMETLQSQLM*AEK.L                | MYH9    |
| 8538 | 3 | 5.39  | 0.404 | 34/68  | P35579_MYH9_HUMAN   | 0  | K.SMEAEMIQLQEELAAER.A               | MYH9    |
| 7914 | 2 | 5.372 | 0.612 | 24/36  | P68400_CSK21_HUMAN  | 3  | R.LIDWGLAEFYHPGQEYNVR.V             | CSNK2A1 |
| 7912 | 2 | 5.333 | 0.473 | 24/30  | P35579_MYH9_HUMAN   | 0  | R.LQQELDLLVDLDHQR.Q                 | MYH9    |
| 1689 | 2 | 5.332 | 0.61  | 23/40  | P35659_DEK_HUMAN    | 1  | -.MSASAPAAEGEGTPTQPAASEK.E          | DEK     |
| 7987 | 3 | 5.329 | 0.43  | 34/84  | P68400_CSK21_HUMAN  | 5  | R.EYWDYESHVVEWGNQDDYQLVR.K          | CSNK2A1 |
| 5015 | 2 | 5.326 | 0.513 | 24/26  | P35659_DEK_HUMAN    | 2  | K.KLLASANLEEVTMK.Q                  | DEK     |
| 6478 | 2 | 5.323 | 0.468 | 22/26  | P12956_XRCC6_HUMAN  | 1  | K.NIYVLQELDNPGAK.R                  | XRCC6   |
| 6440 | 2 | 5.323 | 0.502 | 25/30  | P62736_ACTA_HUMAN   | 9  | K.SYELPDGQVITIGNER.F                | ACTA2   |
| 4579 | 2 | 5.312 | 0.481 | 26/32  | P11021_GRP78_HUMAN  | 0  | K.SIFSTADSNQPTVTIK.V                | HSPA5   |
| 7864 | 2 | 5.31  | 0.455 | 22/26  | P06748_NPM_HUMAN    | 0  | R.M*TDQEAIQDLWQWR.K                 | NPM1    |
| 7253 | 3 | 5.301 | 0.577 | 34/68  | P35579_MYH9_HUMAN   | 0  | K.LQVELDNVTGLLSQSDSK.S              | MYH9    |
| 7545 | 2 | 5.297 | 0.516 | 22/26  | P0DME0_SETLP_HUMAN  | 3  | R.IDFYFDENPYFENK.V                  | SETSIP  |
| 6842 | 3 | 5.295 | 0.469 | 36/76  | P68400_CSK21_HUMAN  | 4  | R.FVHSENQHLVSPEALDFLDK.L            | CSNK2A1 |
| 7737 | 3 | 5.295 | 0.47  | 35/88  | P67870_CSK2B_HUMAN  | 2  | R.VYC#ENQPM*LPIGLSDIPGEAMVK.L       | CSNK2B  |
| 6139 | 2 | 5.292 | 0.474 | 24/30  | P11021_GRP78_HUMAN  | 0  | K.IEWLESHQDADIEDFK.A                | HSPA5   |
| 8000 | 2 | 5.292 | 0.625 | 25/36  | P19784_CSK22_HUMAN  | 1  | R.LIDWGLAEFYHPAQEYNVR.V             | CSNK2A2 |
| 1110 | 2 | 5.29  | 0.572 | 25/40  | P35659_DEK_HUMAN    | 1  | -.M*SASAPAAEGEGTPTQPAASEK.E         | DEK     |
| 5052 | 2 | 5.288 | 0.498 | 24/28  | P35579_MYH9_HUMAN   | 0  | R.LTEM*ETLQSQLMAEK.L                | MYH9    |
| 4217 | 2 | 5.271 | 0.491 | 21/28  | P35579_MYH9_HUMAN   | 0  | R.LTEM*ETLQSQLM*AEK.L               | MYH9    |
| 5411 | 2 | 5.265 | 0.451 | 24/28  | Q07021_C1QBP_HUMAN  | 2  | K.M*SGWLELELNGTEAK.L                | C1QBP   |
| 5764 | 2 | 5.264 | 0.569 | 22/30  | P12268_IMDH2_HUMAN  | 1  | K.KYEQQFITDPVVLSPK.D                | IMPDH2  |
| 3876 | 2 | 5.261 | 0.475 | 23/26  | P35659_DEK_HUMAN    | 2  | K.KLLASANLEEVTMK.Q                  | DEK     |
| 8278 | 3 | 5.253 | 0.546 | 40/120 | Q9BQ67_GRWD1_HUMAN  | 0  | R.DPEAGDVEADPGLADLPQQLLFVHQGETELK.E | GRWD1   |
| 4922 | 2 | 5.236 | 0.556 | 24/26  | P35659_DEK_HUMAN    | 2  | K.KLLASANLEEVTMK.Q                  | DEK     |
| 6564 | 2 | 5.233 | 0.506 | 23/28  | P19784_CSK22_HUMAN  | 1  | K.YSEVFEAINITNNER.V                 | CSNK2A2 |
| 8658 | 3 | 5.231 | 0.386 | 31/84  | P68400_CSK21_HUMAN  | 5  | R.EYWDYESHVVEWGNQDDYQLVR.K          | CSNK2A1 |
| 6717 | 2 | 5.228 | 0.462 | 23/30  | P67870_CSK2B_HUMAN  | 4  | R.GNEFFC#EVEDEDIQDK.F               | CSNK2B  |
| 6827 | 2 | 5.222 | 0.416 | 23/28  | P68400_CSK21_HUMAN  | 5  | K.YSEVFEAINITNNEK.V                 | CSNK2A1 |
| 8921 | 3 | 5.212 | 0.389 | 34/88  | P35579_MYH9_HUMAN   | 0  | K.LEGDSTDLSDQIAELQAIAELK.M          | MYH9    |
| 6761 | 2 | 5.21  | 0.582 | 26/40  | SAV1_STRVL          | 2  | R.YDSAPATDGGSGTALGWTVAWK.N          |         |
| 8531 | 3 | 5.208 | 0.522 | 29/84  | P68400_CSK21_HUMAN  | 5  | R.EYWDYESHVVEWGNQDDYQLVR.K          | CSNK2A1 |
| 6025 | 3 | 5.206 | 0.272 | 29/72  | J3KS37_J3KS37_HUMAN | 0  | -.KGSC#PFQTATELMEPTRR.E             | RECQL5  |
| 6680 | 3 | 5.204 | 0.365 | 33/76  | P35579_MYH9_HUMAN   | 0  | K.KMQQNIQELEEQLLEEEESAR.Q           | MYH9    |
| 4976 | 3 | 5.2   | 0.392 | 35/76  | P07477_TRY1_HUMAN   | 10 | R.LGHEHNIEVLEGNEQFINAAK.I           | PRSS1   |
| 8326 | 3 | 5.198 | 0.458 | 34/80  | P06748_NPM_HUMAN    | 1  | K.M*SVQPTVSLGGFEITPPVVL.R           | NPM1    |
| 7639 | 2 | 5.197 | 0.701 | 25/36  | SAV_STRAV           | 0  | R.NAHSATTWSGQYVGGAEAR.I             |         |
| 5977 | 2 | 5.186 | 0.634 | 26/40  | SAV1_STRVL          | 2  | R.YDSAPATDGGSGTALGWTVAWK.N          |         |
| 7514 | 3 | 5.184 | 0.465 | 33/80  | P35579_MYH9_HUMAN   | 2  | K.YLYYDKNFINNPLAQADWAAK.K           | MYH9    |
| 6344 | 2 | 5.176 | 0.479 | 25/30  | P62736_ACTA_HUMAN   | 9  | K.SYELPDGQVITIGNER.F                | ACTA2   |
| 6446 | 2 | 5.142 | 0.593 | 24/30  | P08107_HSP71_HUMAN  | 1  | R.IINEPTAAAIAYGLDR.T                | HSPA1A  |
| 6142 | 2 | 5.142 | 0.475 | 24/30  | P38646_GRP75_HUMAN  | 0  | R.VINEPTAAALAYGLDK.S                | HSPA9   |
| 7895 | 3 | 5.133 | 0.49  | 34/92  | P39023_RL3_HUMAN    | 4  | R.LEQQVPVNQVFGQDEMIDVIGVTK.G        | RPL3    |
| 5816 | 3 | 5.125 | 0.539 | 33/68  | SAV1_STRVL          | 1  | R.INTQWLLTSGTTEANAWK.S              |         |
| 7908 | 2 | 5.117 | 0.261 | 27/36  | P27694_RFA1_HUMAN   | 1  | R.GWFDAGEQALDGVSSIDLK.S             | RPA1    |
| 6678 | 3 | 5.111 | 0.374 | 34/76  | P07477_TRY1_HUMAN   | 10 | R.LGHEHNIEVLEGNEQFINAAK.I           | PRSS1   |
| 1206 | 2 | 5.104 | 0.621 | 26/40  | P35659_DEK_HUMAN    | 1  | -.M*SASAPAAEGEGTPTQPAASEK.E         | DEK     |
| 2813 | 3 | 5.102 | 0.477 | 34/112 | P35659_DEK_HUMAN    | 1  | -.MSASAPAAEGEGTPTQPAASEKEPEMPGPR.E  | DEK     |
| 5120 | 2 | 5.1   | 0.509 | 24/26  | P35659_DEK_HUMAN    | 2  | K.KLLASANLEEVTMK.Q                  | DEK     |
| 3334 | 3 | 5.096 | 0.641 | 38/112 | P37108_SRP14_HUMAN  | 1  | K.AAAAAAAAAAAAAATAPTTAATTAATAAQ.-   | SRP14   |

|      |   |       |       |        |                    |    |                                    |           |
|------|---|-------|-------|--------|--------------------|----|------------------------------------|-----------|
| 3734 | 2 | 5.095 | 0.507 | 22/28  | P35659_DEK_HUMAN   | 2  | K.KVYENYPTYDLTERK.D                | DEK       |
| 7929 | 2 | 5.093 | 0.646 | 25/34  | P12268_IMDH2_HUMAN | 2  | K.GKLPVNEDELVAIIAR.T               | IMPDH2    |
| 2360 | 2 | 5.088 | 0.555 | 26/36  | P67809_YBOX1_HUMAN | 2  | K.GAEANVTGPGGVPVQGS.K.Y            | YBX1      |
| 8696 | 3 | 5.079 | 0.435 | 37/92  | P56537_IF6_HUMAN   | 0  | K.TSIEDQDELSSLLQVPLVAGTVNR.G       | EIF6      |
| 8452 | 2 | 5.078 | 0.488 | 25/36  | P04908_H2A1B_HUMAN | 10 | R.VTIAQGGVLPNIQAVLLPK.K            | HIST1H2AB |
| 6788 | 3 | 5.075 | 0.466 | 42/100 | P39023_RL3_HUMAN   | 4  | R.ERLEQQVVPVNVQVFGQDEM*IDVIGVTK.G  | RPL3      |
| 5512 | 3 | 5.065 | 0.306 | 31/64  | P67870_CSK2B_HUMAN | 1  | K.IHPM*AYQLQLQAASNFK.S             | CSNK2B    |
| 7581 | 2 | 5.054 | 0.491 | 26/38  | Q07021_C1QBP_HUMAN | 2  | K.VEEQEPELTSTPNFVVEVIK.N           | C1QBP     |
| 8122 | 3 | 5.053 | 0.451 | 30/84  | Q00839_HNRPU_HUMAN | 0  | K.EKPYFPIPEEYTFIQNVPLEDR.V         | HNRNPU    |
| 4725 | 2 | 5.053 | 0.503 | 22/28  | P08107_HSP71_HUMAN | 0  | K.NQVALNPQNTVFDAR.R                | HSPA1A    |
| 4669 | 3 | 5.035 | 0.485 | 35/80  | Q9BRJ6_CG050_HUMAN | 1  | K.GEAVLRPGLDAEPELSPPEQR.V          | C7orf50   |
| 6938 | 3 | 5.02  | 0.39  | 34/76  | P68400_CSK21_HUMAN | 4  | R.FVHSEHQHLVSPEALDFDLK.L           | CSNK2A1   |
| 9007 | 3 | 5.015 | 0.276 | 31/84  | P68400_CSK21_HUMAN | 5  | R.EYWDYESHVVEWGNQDDYQLVR.K         | CSNK2A1   |
| 8330 | 3 | 5.01  | 0.572 | 36/80  | P68400_CSK21_HUMAN | 2  | K.VLGTEDLYDYIDKYNIELDPR.F          | CSNK2A1   |
| 7215 | 3 | 5.001 | 0.362 | 30/100 | Q9GZR7_DDX24_HUMAN | 2  | K.TGGTVSDQALLFGDDDAGEGPPSSLIR.E    | DDX24     |
| 5754 | 3 | 4.993 | 0.522 | 30/80  | SAV1_STRVL         | 2  | R.YDSAPATDGSQTALGWTVAWK.N          |           |
| 5722 | 3 | 4.993 | 0.423 | 30/64  | P35579_MYH9_HUMAN  | 0  | K.KANLQIDQINTDLNLER.S              | MYH9      |
| 7056 | 3 | 4.981 | 0.457 | 34/92  | P39023_RL3_HUMAN   | 4  | R.LEQQVVPVNVQVFGQDEM*IDVIGVTK.G    | RPL3      |
| 5171 | 2 | 4.973 | 0.445 | 22/28  | P11021_GRP78_HUMAN | 0  | K.KSDIDEIVLVGGSTR.I                | HSPA5     |
| 8720 | 2 | 4.962 | 0.509 | 22/30  | Q9BQ67_GRWD1_HUMAN | 1  | R.LLQVVEEPQALAAFLR.D               | GRWD1     |
| 5410 | 2 | 4.956 | 0.485 | 20/26  | P12268_IMDH2_HUMAN | 2  | K.REDLVVAPAGITLK.E                 | IMPDH2    |
| 4948 | 2 | 4.948 | 0.686 | 26/32  | P05386_RLA1_HUMAN  | 2  | K.KEESEESDDDM*GFGLFD.-             | RPLP1     |
| 8110 | 3 | 4.947 | 0.417 | 37/120 | Q96QR8_PURB_HUMAN  | 0  | R.GGGGFGAGPGGGLQSGQTIALPAQGLIEFR.D | PURB      |
| 6290 | 2 | 4.935 | 0.577 | 25/30  | P11021_GRP78_HUMAN | 7  | R.IINEPTAAAIYGLDK.R                | HSPA5     |
| 7012 | 2 | 4.928 | 0.432 | 23/28  | P68400_CSK21_HUMAN | 5  | K.YSEVFEAINITNNEK.V                | CSNK2A1   |
| 6683 | 3 | 4.926 | 0.299 | 34/72  | P35580_MYH10_HUMAN | 3  | K.LQQLFNHTM*FILEQEEYQR.E           | MYH10     |
| 7509 | 2 | 4.908 | 0.405 | 23/28  | Q71U36_TBA1A_HUMAN | 10 | R.AVFVDLEPTVIDEVR.T                | TUBA1A    |
| 7756 | 2 | 4.892 | 0.548 | 23/40  | SAV1_STRVL         | 2  | R.YDSAPATDGSQTALGWTVAWK.N          |           |
| 3645 | 2 | 4.889 | 0.383 | 20/22  | P35579_MYH9_HUMAN  | 0  | K.KVEAQLQELQVK.F                   | MYH9      |
| 4148 | 2 | 4.888 | 0.413 | 23/30  | P35579_MYH9_HUMAN  | 0  | R.IAEFTTNLTTEEEKSK.S               | MYH9      |
| 6834 | 3 | 4.883 | 0.195 | 29/80  | P60709_ACTB_HUMAN  | 1  | K.DLYANTVLSGGTTMYPGIADR.M          | ACTB      |
| 1593 | 2 | 4.88  | 0.597 | 22/26  | P35579_MYH9_HUMAN  | 0  | R.ELEDATETADAM*NR.E                | MYH9      |
| 1146 | 3 | 4.874 | 0.553 | 34/80  | P35659_DEK_HUMAN   | 1  | -M*SASAPAAEGEGTPTQPASEK.E          | DEK       |
| 4745 | 3 | 4.865 | 0.403 | 28/60  | P35244_RFA3_HUMAN  | 1  | K.EDSHPFDLGLYNEAVK.I               | RPA3      |
| 6298 | 3 | 4.862 | 0.404 | 30/56  | P68400_CSK21_HUMAN | 5  | K.YSEVFEAINITNNEK.V                | CSNK2A1   |
| 6601 | 3 | 4.85  | 0.441 | 28/64  | Q9H9A7_RMI1_HUMAN  | 2  | K.VLGGVDLALLEEYAEQK.V              | RMI1      |
| 5631 | 2 | 4.845 | 0.397 | 24/30  | P62987_RL40_HUMAN  | 22 | K.TITLEVEPDSDTIENVK.A              | UBA52     |
| 4122 | 2 | 4.843 | 0.534 | 21/26  | P62913_RL11_HUMAN  | 2  | K.VLEQLTGQTPVFSK.A                 | RPL11     |
| 3768 | 2 | 4.842 | 0.525 | 20/28  | P60660_MYL6_HUMAN  | 9  | K.NKDDQGTEDYVEGLR.V                | MYL6      |
| 9010 | 3 | 4.841 | 0.32  | 33/64  | P67870_CSK2B_HUMAN | 1  | K.IHPM*AYQLQLQAASNFK.S             | CSNK2B    |
| 6297 | 3 | 4.837 | 0.473 | 33/72  | P05387_RLA2_HUMAN  | 0  | R.YVASYLALGNSSPSAK.D               | RPLP2     |
| 6605 | 2 | 4.837 | 0.523 | 22/26  | P35579_MYH9_HUMAN  | 1  | K.NLPIYSEEIVEM*YK.G                | MYH9      |
| 6664 | 2 | 4.834 | 0.491 | 23/28  | Q08945_SSRP1_HUMAN | 0  | K.VDNIQAGELTEGIWR.R                | SSRP1     |
| 8292 | 2 | 4.827 | 0.583 | 24/30  | P12268_IMDH2_HUMAN | 2  | K.LPIVNEDELVAIIAR.T                | IMPDH2    |
| 6735 | 3 | 4.82  | 0.488 | 31/80  | P68400_CSK21_HUMAN | 2  | K.VLGTEDLYDYIDKYNIELDPR.F          | CSNK2A1   |
| 7476 | 3 | 4.816 | 0.455 | 32/80  | SAV1_STRVL         | 2  | R.YDSAPATDGSQTALGWTVAWK.N          |           |
| 6935 | 3 | 4.81  | 0.202 | 30/80  | P60709_ACTB_HUMAN  | 1  | K.DLYANTVLSGGTTMYPGIADR.M          | ACTB      |
| 5557 | 3 | 4.802 | 0.442 | 30/68  | P19105_ML12A_HUMAN | 4  | R.ATSNVFAM*FDQSQIQEFK.E            | MYL12A    |
| 3781 | 2 | 4.795 | 0.517 | 21/36  | P35579_MYH9_HUMAN  | 0  | R.QAQQERDELADEINSSGK.G             | MYH9      |
| 8963 | 2 | 4.794 | 0.515 | 18/28  | P68400_CSK21_HUMAN | 5  | K.YSEVFEAINITNNEK.V                | CSNK2A1   |
| 7481 | 2 | 4.793 | 0.511 | 20/34  | SAV1_STRVL         | 1  | R.INTQWLLTSGTTEANAWK.S             |           |
| 4086 | 2 | 4.787 | 0.464 | 20/24  | P35579_MYH9_HUMAN  | 0  | K.IAQLLEQLDNETK.E                  | MYH9      |
| 7266 | 3 | 4.782 | 0.463 | 31/84  | P19784_CSK22_HUMAN | 1  | R.EYWDYEAHVPSWGNQDDYQLVR.K         | CSNK2A2   |
| 3577 | 2 | 4.778 | 0.517 | 23/28  | P11142_HSP7C_HUMAN | 8  | K.NQVAM*NPTNTVFDAR.R               | HSPA8     |
| 5530 | 2 | 4.771 | 0.456 | 22/26  | P67870_CSK2B_HUMAN | 4  | K.FNLTLGLNEQVPHYR.Q                | CSNK2B    |
| 5487 | 3 | 4.769 | 0.525 | 38/92  | O75531_BAF_HUMAN   | 0  | R.DFVAEPM*GEKPVGSLAGIEVLGK.K       | BANF1     |
| 7005 | 2 | 4.762 | 0.43  | 18/28  | P33778_H2B1B_HUMAN | 14 | K.AM*GIM*NSFVNDIFER.I              | HIST1H2BB |
| 5849 | 3 | 4.758 | 0.481 | 32/80  | SAV1_STRVL         | 2  | R.YDSAPATDGSQTALGWTVAWK.N          |           |
| 6304 | 2 | 4.757 | 0.61  | 27/40  | SAV1_STRVL         | 2  | R.YDSAPATDGSQTALGWTVAWK.N          |           |
| 7379 | 2 | 4.742 | 0.413 | 22/28  | Q9N13_RBM28_HUMAN  | 2  | R.SEQLEELFSQVGPVK.Q                | RBM28     |
| 5252 | 2 | 4.742 | 0.32  | 20/26  | P11021_GRP78_HUMAN | 0  | K.KKELEEIVQPIISK.L                 | HSPA5     |
| 9015 | 2 | 4.736 | 0.628 | 21/36  | SAV_STRAV          | 0  | R.NAHSATTWSGQYVGGAEAR.I            |           |
| 7736 | 3 | 4.734 | 0.436 | 30/72  | SAV_STRAV          | 0  | R.NAHSATTWSGQYVGGAEAR.I            |           |
| 2569 | 3 | 4.731 | 0.439 | 27/72  | SAV_STRAV          | 0  | R.NAHSATTWSGQYVGGAEAR.I            |           |
| 9226 | 3 | 4.724 | 0.441 | 30/72  | SAV_STRAV          | 0  | R.NAHSATTWSGQYVGGAEAR.I            |           |
| 6076 | 3 | 4.723 | 0.361 | 28/76  | Q07021_C1QBP_HUMAN | 2  | K.VEEQEPELTSTPNFVVEVIK.N           | C1QBP     |
| 6343 | 3 | 4.716 | 0.526 | 28/64  | P35659_DEK_HUMAN   | 2  | R.IILNFLMHPKPSGKPLPK.S             | DEK       |
| 8359 | 3 | 4.714 | 0.236 | 30/52  | P06748_NPM_HUMAN   | 0  | R.MTDQEAIQDLWQWR.K                 | NPM1      |
| 5325 | 2 | 4.712 | 0.612 | 24/32  | P67809_YBOX1_HUMAN | 4  | R.SVGDGETVEFDVVEGK.G               | YBX1      |
| 4549 | 2 | 4.708 | 0.465 | 21/28  | P11142_HSP7C_HUMAN | 8  | K.NQVAMNPTNTVFDAR.R                | HSPA8     |
| 6218 | 3 | 4.705 | 0.507 | 31/80  | P60709_ACTB_HUMAN  | 1  | K.DLYANTVLSGGTTMYPGIADR.M          | ACTB      |
| 1794 | 2 | 4.703 | 0.53  | 21/26  | P68400_CSK21_HUMAN | 3  | R.DVKPHNVMDIHEHR.K                 | CSNK2A1   |
| 8335 | 2 | 4.701 | 0.559 | 23/30  | P12268_IMDH2_HUMAN | 2  | K.LPIVNEDELVAIIAR.T                | IMPDH2    |
| 7641 | 3 | 4.69  | 0.174 | 28/88  | P67870_CSK2B_HUMAN | 2  | R.VYC#ENQPMPLPIGLSDIPGEAM*VK.L     | CSNK2B    |
| 8485 | 2 | 4.682 | 0.378 | 22/26  | P35579_MYH9_HUMAN  | 0  | R.VISGVLQGNIVFK.K                  | MYH9      |
| 6406 | 2 | 4.682 | 0.529 | 21/28  | P12268_IMDH2_HUMAN | 2  | K.YEQGFITDPVVLSPK.D                | IMPDH2    |
| 5737 | 3 | 4.673 | 0.427 | 30/56  | P35579_MYH9_HUMAN  | 0  | R.LTEMETLQSQLM*AEK.L               | MYH9      |

|      |   |       |       |        |                    |    |                                    |           |
|------|---|-------|-------|--------|--------------------|----|------------------------------------|-----------|
| 7412 | 3 | 4.672 | 0.375 | 29/60  | P62424_RL7A_HUMAN  | 1  | R.LKVPAINQFTQALDR.Q                | RPL7A     |
| 7062 | 3 | 4.667 | 0.387 | 35/72  | P06748_NPM_HUMAN   | 0  | K.DELHIVEAEAMNYEGSPIK.V            | NPM1      |
| 6726 | 2 | 4.666 | 0.573 | 22/30  | P67870_CSK2B_HUMAN | 4  | R.GNEFFC#EVEDEDIQDK.F              | CSNK2B    |
| 3748 | 3 | 4.658 | 0.523 | 28/72  | P35579_MYH9_HUMAN  | 0  | R.QAQQERDELADEIANSSGK.G            | MYH9      |
| 7627 | 3 | 4.658 | 0.397 | 33/96  | P20839_IMDH1_HUMAN | 5  | K.FEQGFITDPVVLSPSHITVGDVLEAK.M     | IMPDH1    |
| 5365 | 2 | 4.656 | 0.583 | 22/24  | P35659_DEK_HUMAN   | 2  | K.LLASANLEEVMTM.Q                  | DEK       |
| 4206 | 2 | 4.634 | 0.449 | 18/26  | IGKC_MOUSE         | 0  | R.QNGVLNSWTDQDSK.D                 |           |
| 8006 | 3 | 4.634 | 0.396 | 33/92  | Q9BVP2_GNL3_HUMAN  | 0  | R.SPASIEVVKPMEASAILSQADAR.Q        | GNL3      |
| 5382 | 3 | 4.632 | 0.382 | 25/48  | P35659_DEK_HUMAN   | 2  | K.LLASANLEEVMTM.Q                  | DEK       |
| 8271 | 3 | 4.628 | 0.251 | 32/72  | P27694_RFA1_HUMAN  | 0  | R.ATAFNEQVDKFFPLIEVKN.V            | RPA1      |
| 5417 | 3 | 4.626 | 0.237 | 30/64  | P67870_CSK2B_HUMAN | 1  | K.IHPM*AYQLQLQAASNFK.S             | CSNK2B    |
| 5946 | 2 | 4.625 | 0.496 | 23/28  | P33778_H2B1B_HUMAN | 14 | K.AM*GIM*NSFVNDIFER.I              | HIST1H2BB |
| 5848 | 2 | 4.621 | 0.511 | 22/24  | P35659_DEK_HUMAN   | 2  | K.LLASANLEEVMTM.Q                  | DEK       |
| 2120 | 2 | 4.616 | 0.48  | 20/26  | P35659_DEK_HUMAN   | 2  | K.KPPTDEELKETIKK.L                 | DEK       |
| 7420 | 2 | 4.612 | 0.452 | 24/28  | P68400_CSK21_HUMAN | 5  | K.YSEVFEAINITNNEK.V                | CSNK2A1   |
| 5255 | 2 | 4.609 | 0.2   | 24/30  | P30050_RL12_HUMAN  | 0  | R.QAQIEVVPASALIIK.A                | RPL12     |
| 8901 | 2 | 4.604 | 0.559 | 23/40  | Q9NYL9_TMOD3_HUMAN | 0  | K.QLETVLDDLDPENALLPAGFR.Q          | TMOD3     |
| 5657 | 2 | 4.602 | 0.538 | 22/24  | P35659_DEK_HUMAN   | 2  | K.LLASANLEEVMTM.Q                  | DEK       |
| 8948 | 2 | 4.602 | 0.612 | 21/24  | P35659_DEK_HUMAN   | 2  | K.LLASANLEEVMTM.Q                  | DEK       |
| 7220 | 3 | 4.593 | 0.506 | 32/80  | SAV1_STRVL         | 2  | R.YDSAPATDGGSTALGWTVAWK.N          |           |
| 7669 | 3 | 4.59  | 0.546 | 33/80  | P68400_CSK21_HUMAN | 2  | K.VLGTEDLYDYIDKYNIELDPR.F          | CSNK2A1   |
| 3637 | 3 | 4.585 | 0.133 | 24/44  | P35579_MYH9_HUMAN  | 0  | K.KVEAQLQELQVK.F                   | MYH9      |
| 5750 | 3 | 4.582 | 0.357 | 32/60  | P12268_IMDH2_HUMAN | 1  | K.KYEQQFITDPVVLSPK.D               | IMPDH2    |
| 7642 | 3 | 4.578 | 0.389 | 28/72  | SAV_STRAV          | 0  | R.NAHSATTWSGQYVGGAEAR.I            |           |
| 5754 | 2 | 4.571 | 0.517 | 22/24  | P35659_DEK_HUMAN   | 2  | K.LLASANLEEVMTM.Q                  | DEK       |
| 8349 | 3 | 4.567 | 0.415 | 29/84  | P68400_CSK21_HUMAN | 5  | R.EYWYDYESHVVEWGNQDDYQLVR.K        | CSNK2A1   |
| 7083 | 2 | 4.566 | 0.429 | 22/28  | P02545_LMNA_HUMAN  | 2  | R.M*QQQLDEYQELLDIK.L               | LMNA      |
| 7593 | 3 | 4.564 | 0.5   | 33/76  | Q07021_C1QBP_HUMAN | 2  | K.VEEQPELTSTPNFVVEVIK.N            | C1QBP     |
| 8484 | 3 | 4.56  | 0.269 | 28/112 | Q00577_PURA_HUMAN  | 0  | R.DYLGDFIEHYAQLGPSQPPDLAQQAQDEPR.R | PURA      |
| 5348 | 2 | 4.554 | 0.483 | 22/24  | P35659_DEK_HUMAN   | 2  | K.LLASANLEEVMTM.K.Q                | DEK       |
| 6264 | 3 | 4.553 | 0.394 | 25/48  | P19784_CSK22_HUMAN | 2  | R.HLVSPREALDLLDK.L                 | CSNK2A2   |
| 5557 | 2 | 4.553 | 0.495 | 22/34  | Q71U36_TBA1A_HUMAN | 9  | K.VGINYPPTVVPGGDLAK.V              | TUBA1A    |
| 8233 | 2 | 4.549 | 0.51  | 20/30  | P35749_MYH11_HUMAN | 4  | K.QLLQANPILEAFGNAK.T               | MYH11     |
| 6550 | 3 | 4.546 | 0.495 | 31/60  | P05388_RLA0_HUMAN  | 10 | R.GNVGVFVKEDLTEIR.D                | RPLP0     |
| 3004 | 2 | 4.546 | 0.522 | 21/26  | P46777_RL5_HUMAN   | 1  | K.GAVDGLSIPHSK.R                   | RPL5      |
| 8599 | 2 | 4.543 | 0.442 | 21/24  | Q9UGN5_PARP2_HUMAN | 1  | K.YYLIQLLEDDAQR.N                  | PARP2     |
| 7028 | 3 | 4.541 | 0.328 | 27/44  | P11021_GRP78_HUMAN | 0  | R.AKFEELNMDLFR.S                   | HSPA5     |
| 4397 | 2 | 4.536 | 0.311 | 21/30  | P62987_RL40_HUMAN  | 22 | K.TITLEVEPSDTIENVK.A               | UBA52     |
| 4122 | 2 | 4.535 | 0.343 | 19/26  | P35659_DEK_HUMAN   | 2  | K.KVYENYPTYDLTER.K                 | DEK       |
| 6777 | 2 | 4.535 | 0.519 | 21/24  | P68400_CSK21_HUMAN | 2  | K.VLGTEDLYDYIDK.Y                  | CSNK2A1   |
| 4583 | 2 | 4.534 | 0.431 | 23/26  | P35579_MYH9_HUMAN  | 0  | R.IAEFTTNLTETEEK.S                 | MYH9      |
| 2858 | 3 | 4.533 | 0.381 | 30/72  | SAV_STRAV          | 0  | R.NAHSATTWSGQYVGGAEAR.I            |           |
| 4458 | 2 | 4.532 | 0.438 | 20/24  | P35659_DEK_HUMAN   | 2  | K.VYENYPTYDLTER.K                  | DEK       |
| 9039 | 2 | 4.532 | 0.66  | 20/40  | P60709_ACTB_HUMAN  | 1  | K.DLYANTVLSGGTTMYPGIADR.M          | ACTB      |
| 4362 | 2 | 4.525 | 0.491 | 20/28  | P11021_GRP78_HUMAN | 0  | K.NQLTSNPENTVFDAR.R                | HSPA5     |
| 7108 | 2 | 4.524 | 0.496 | 22/30  | Q13610_PWP1_HUMAN  | 1  | R.VWDISTVSSVNEAFGR.R               | PWP1      |
| 5604 | 3 | 4.517 | 0.35  | 30/64  | P67870_CSK2B_HUMAN | 1  | K.IHPM*AYQLQLQAASNFK.S             | CSNK2B    |
| 7849 | 2 | 4.517 | 0.556 | 19/22  | Q8NHW5_RLA0L_HUMAN | 6  | K.TSFFQALGITK.I                    | RPLP0P6   |
| 8447 | 3 | 4.514 | 0.39  | 27/84  | P68400_CSK21_HUMAN | 5  | R.EYWYDYESHVVEWGNQDDYQLVR.K        | CSNK2A1   |
| 4905 | 3 | 4.51  | 0.424 | 33/64  | P35659_DEK_HUMAN   | 2  | R.ILNFLM*HPKPSGKPLPK.S             | DEK       |
| 7444 | 2 | 4.51  | 0.531 | 22/26  | P35579_MYH9_HUMAN  | 1  | K.NLPIYSEIEVEMYK.G                 | MYH9      |
| 6333 | 2 | 4.51  | 0.484 | 24/28  | O60264_SMCA5_HUMAN | 0  | K.ESEITDEDIDGILER.G                | SMARCA5   |
| 8378 | 2 | 4.509 | 0.499 | 21/24  | Q9NY61_AATF_HUMAN  | 0  | K.NQIALWDQLLEGR.I                  | AATF      |
| 6602 | 3 | 4.503 | 0.338 | 28/56  | P35579_MYH9_HUMAN  | 0  | R.LTEMETLQSQLMAEK.L                | MYH9      |
| 9322 | 3 | 4.497 | 0.363 | 29/72  | SAV_STRAV          | 0  | R.NAHSATTWSGQYVGGAEAR.I            |           |
| 1043 | 2 | 4.497 | 0.517 | 21/28  | P35579_MYH9_HUMAN  | 0  | R.TEM*EDLM*SSKDDVVK.S              | MYH9      |
| 5566 | 2 | 4.497 | 0.486 | 23/30  | P12956_XRCC6_HUMAN | 1  | R.TFNTSTGGLLPSDTR.K                | XRCC6     |
| 7429 | 3 | 4.488 | 0.443 | 33/72  | SAV_STRAV          | 0  | R.NAHSATTWSGQYVGGAEAR.I            |           |
| 4361 | 2 | 4.476 | 0.534 | 22/28  | P11021_GRP78_HUMAN | 0  | K.NQLTSNPENTVFDAR.R                | HSPA5     |
| 5301 | 2 | 4.476 | 0.438 | 21/26  | P62913_RL11_HUMAN  | 2  | K.VLEQLTGQTPVFSK.A                 | RPL11     |
| 9017 | 3 | 4.476 | 0.398 | 26/64  | P68400_CSK21_HUMAN | 5  | R.GKYSEVFEAINITNNEK.V              | CSNK2A1   |
| 6062 | 3 | 4.467 | 0.416 | 31/76  | P68400_CSK21_HUMAN | 4  | R.FVHSENQHLVSPREALDFLDK.L          | CSNK2A1   |
| 4250 | 3 | 4.462 | 0.377 | 30/64  | P67870_CSK2B_HUMAN | 1  | K.IHPM*AYQLQLQAASNFK.S             | CSNK2B    |
| 5051 | 2 | 4.458 | 0.343 | 21/24  | P27635_RL10_HUMAN  | 3  | K.FNADEFEDM*VAEK.R                 | RPL10     |
| 7480 | 2 | 4.458 | 0.419 | 21/26  | P18124_RL7_HUMAN   | 1  | R.IVEPYIAWGYPNLK.S                 | RPL7      |
| 4853 | 2 | 4.453 | 0.466 | 21/24  | P35659_DEK_HUMAN   | 2  | K.LLASANLEEVMTM.K.Q                | DEK       |
| 4570 | 2 | 4.447 | 0.481 | 21/24  | P35659_DEK_HUMAN   | 2  | K.LLASANLEEVMTM.K.Q                | DEK       |
| 8127 | 3 | 4.445 | 0.472 | 29/84  | P68400_CSK21_HUMAN | 5  | R.EYWYDYESHVVEWGNQDDYQLVR.K        | CSNK2A1   |
| 2074 | 2 | 4.441 | 0.376 | 18/24  | P06748_NPM_HUMAN   | 1  | K.VDNDENEHQLSLR.T                  | NPM1      |
| 4650 | 2 | 4.439 | 0.487 | 21/24  | P35659_DEK_HUMAN   | 2  | K.VYENYPTYDLTER.K                  | DEK       |
| 3239 | 3 | 4.431 | 0.454 | 30/72  | SAV_STRAV          | 0  | R.NAHSATTWSGQYVGGAEAR.I            |           |
| 9004 | 2 | 4.43  | 0.474 | 21/24  | P35659_DEK_HUMAN   | 2  | K.LLASANLEEVMTM.K.Q                | DEK       |
| 7122 | 3 | 4.429 | 0.344 | 26/92  | P11142_HSP7C_HUMAN | 4  | K.QTQTFTTYSDNQPGLVIQVYEGER.A       | HSPA8     |
| 6063 | 2 | 4.429 | 0.447 | 21/34  | P46778_RL21_HUMAN  | 0  | R.TNGKEPELLEPIPYEFM*A.-            | RPL21     |
| 8009 | 3 | 4.428 | 0.536 | 32/72  | P68400_CSK21_HUMAN | 3  | R.LIDWGLAEFYHPGQEYNVR.V            | CSNK2A1   |
| 5928 | 3 | 4.425 | 0.535 | 35/92  | O75531_BAF_HUMAN   | 0  | R.DFVAEPMGKPVGSLAGIGEVLGK.K        | BANF1     |
| 5212 | 2 | 4.42  | 0.381 | 20/30  | P19784_CSK22_HUMAN | 2  | R.REPFFHGQDNYDQLVR.I               | CSNK2A2   |
| 8134 | 2 | 4.415 | 0.463 | 22/30  | P35749_MYH11_HUMAN | 4  | K.QLLQANPILEAFGNAK.T               | MYH11     |

|      |   |       |       |        |                    |    |                                    |           |
|------|---|-------|-------|--------|--------------------|----|------------------------------------|-----------|
| 4494 | 2 | 4.411 | 0.538 | 19/24  | O43143_DHX15_HUMAN | 0  | R.EVDDLGPVEVDIK.I                  | DHX15     |
| 7461 | 2 | 4.409 | 0.411 | 20/28  | P33778_H2B1B_HUMAN | 14 | K.AM*GIM*NSFVNDIFER.I              | HIST1H2BB |
| 2952 | 3 | 4.409 | 0.433 | 29/56  | P35659_DEK_HUMAN   | 2  | K.LKKPPTDEELKETIK.K                | DEK       |
| 7330 | 2 | 4.409 | 0.303 | 21/30  | Q9BQ67_GRWD1_HUMAN | 1  | R.VSWLGEEPVAGVWSEK.G               | GRWD1     |
| 6424 | 2 | 4.409 | 0.623 | 23/40  | SAV1_STRVL         | 2  | R.YDSAPATDGGSTALGWTVAWK.N          |           |
| 6336 | 2 | 4.407 | 0.341 | 20/32  | P35659_DEK_HUMAN   | 2  | R.ILNFLMHPKPSGKPLPK.S              | DEK       |
| 6357 | 3 | 4.407 | 0.271 | 29/56  | P19784_CSK22_HUMAN | 1  | K.YSEVFEAINITNNER.V                | CSNK2A2   |
| 6372 | 3 | 4.406 | 0.403 | 33/60  | P35579_MYH9_HUMAN  | 0  | K.ANLQIDQINTDLNLER.S               | MYH9      |
| 8887 | 2 | 4.406 | 0.58  | 20/22  | O43143_DHX15_HUMAN | 0  | R.TLATDILMGVLK.E                   | DHX15     |
| 4026 | 2 | 4.405 | 0.394 | 18/26  | P35659_DEK_HUMAN   | 2  | K.VYENPTYDLTERK.D                  | DEK       |
| 2964 | 2 | 4.401 | 0.571 | 23/30  | P30050_RL12_HUMAN  | 0  | K.EILGTAQSVGC#NVDGR.H              | RPL12     |
| 6138 | 2 | 4.398 | 0.56  | 22/24  | P35659_DEK_HUMAN   | 2  | K.LLASANLEEVMTK.Q                  | DEK       |
| 2333 | 2 | 4.397 | 0.446 | 23/30  | P54652_HSP72_HUMAN | 3  | K.STAGDTHLGGEDFDNR.M               | HSP72     |
| 8086 | 2 | 4.396 | 0.067 | 21/28  | P68400_CSK21_HUMAN | 5  | K.YSEVFEAINITNNEK.V                | CSNK2A1   |
| 9016 | 3 | 4.395 | 0.17  | 28/52  | P35659_DEK_HUMAN   | 2  | K.LLASANLEEVMTK.Q                  | DEK       |
| 5165 | 3 | 4.395 | 0.294 | 29/60  | P19784_CSK22_HUMAN | 2  | R.REPFFHGQDNYDQLVR.I               | CSNK2A2   |
| 4245 | 2 | 4.395 | 0.506 | 23/28  | P68400_CSK21_HUMAN | 3  | R.TPALVFHEVNNDFK.Q                 | CSNK2A1   |
| 3391 | 3 | 4.387 | 0.333 | 31/72  | SAV_STRAV          | 0  | R.NAHSATTWSGQYVGGAEAR.I            |           |
| 5874 | 2 | 4.385 | 0.412 | 20/30  | P62736_ACTA_HUMAN  | 7  | K.YPIEHGIITNWDDMEK.I               | ACTA2     |
| 6826 | 3 | 4.385 | 0.406 | 28/72  | SAV_STRAV          | 0  | R.NAHSATTWSGQYVGGAEAR.I            |           |
| 5210 | 2 | 4.384 | 0.342 | 22/38  | P07477_TRY1_HUMAN  | 10 | R.LGEHNIEVLEGNEQFINAAK.I           | PRSS1     |
| 5949 | 3 | 4.383 | 0.429 | 29/68  | P11142_HSP7C_HUMAN | 6  | K.TVTNAVTVTPAYFNDSQR.Q             | HSP7C     |
| 3640 | 3 | 4.382 | 0.211 | 29/48  | P35659_DEK_HUMAN   | 2  | K.LLASANLEEVMTK.Q                  | DEK       |
| 6967 | 3 | 4.381 | 0.474 | 26/56  | P35579_MYH9_HUMAN  | 2  | K.NFINNPLAQADWAAK.K                | MYH9      |
| 4866 | 2 | 4.381 | 0.515 | 21/24  | P35659_DEK_HUMAN   | 2  | K.LLASANLEEVMTK.Q                  | DEK       |
| 8508 | 2 | 4.378 | 0.543 | 18/32  | P31943_HNRH1_HUMAN | 6  | R.ATENDIYNFFSPLNPVR.V              | HNRH1     |
| 5326 | 2 | 4.377 | 0.485 | 24/28  | P68400_CSK21_HUMAN | 3  | R.TPALVFHEVNNDFK.Q                 | CSNK2A1   |
| 4093 | 2 | 4.375 | 0.586 | 21/26  | P11142_HSP7C_HUMAN | 4  | K.SQIHDIVLVGGSTR.I                 | HSP7C     |
| 1783 | 3 | 4.373 | 0.336 | 31/52  | P68400_CSK21_HUMAN | 3  | R.DVKPHNVNMDHEHR.K                 | CSNK2A1   |
| 6926 | 2 | 4.373 | 0.507 | 18/30  | P05386_RLA1_HUMAN  | 0  | K.AAGVNVPEFPWPLFAK.A               | RPL1      |
| 6184 | 2 | 4.366 | 0.342 | 25/28  | P68400_CSK21_HUMAN | 5  | K.YSEVFEAINITNNEK.V                | CSNK2A1   |
| 5143 | 2 | 4.363 | 0.286 | 24/34  | P60709_ACTB_HUMAN  | 9  | R.VAPEEHVLLTEAPLNPK.A              | ACTB      |
| 5594 | 2 | 4.36  | 0.451 | 22/24  | P35659_DEK_HUMAN   | 3  | K.KNVGQFSGFPFEK.G                  | DEK       |
| 8656 | 2 | 4.358 | 0.505 | 20/32  | Q12965_MYO1E_HUMAN | 1  | K.DIILQSNPLLEAFGNAK.T              | MYO1E     |
| 5351 | 3 | 4.35  | 0.5   | 31/64  | P68400_CSK21_HUMAN | 4  | R.EAMEHPYFYTVVKDQAR.M              | CSNK2A1   |
| 9200 | 2 | 4.348 | 0.468 | 20/28  | P68400_CSK21_HUMAN | 5  | K.YSEVFEAINITNNEK.V                | CSNK2A1   |
| 4217 | 2 | 4.346 | 0.552 | 22/24  | P35659_DEK_HUMAN   | 2  | K.LLASANLEEVMTK.Q                  | DEK       |
| 6632 | 2 | 4.342 | 0.349 | 23/38  | P07477_TRY1_HUMAN  | 10 | R.LGEHNIEVLEGNEQFINAAK.I           | PRSS1     |
| 6214 | 2 | 4.338 | 0.333 | 21/32  | P35659_DEK_HUMAN   | 2  | R.ILNFLMHPKPSGKPLPK.S              | DEK       |
| 6393 | 3 | 4.337 | 0.313 | 27/56  | P68400_CSK21_HUMAN | 5  | K.YSEVFEAINITNNEK.V                | CSNK2A1   |
| 6364 | 2 | 4.336 | 0.348 | 21/28  | Q9NR30_DDX21_HUMAN | 3  | K.EGAFSNFPISETIK.L                 | DDX21     |
| 7386 | 3 | 4.335 | 0.534 | 30/68  | SAV1_STRVL         | 1  | R.INTQWLLTSGTTEANAWK.S             |           |
| 7959 | 3 | 4.335 | 0.31  | 31/84  | P13010_XRCC5_HUMAN | 0  | K.YAPTEAQLNAVDALIDSM*SLAK.K        | XRCC5     |
| 5466 | 2 | 4.334 | 0.604 | 21/24  | P35659_DEK_HUMAN   | 2  | K.LLASANLEEVMTK.Q                  | DEK       |
| 5507 | 2 | 4.332 | 0.369 | 19/30  | P62888_RL30_HUMAN  | 3  | R.VC#TLAIDPGDSDIIR.S               | RPL30     |
| 7623 | 2 | 4.331 | 0.365 | 18/36  | P38646_GRP75_HUMAN | 0  | K.STNGDTFLGGEDFDQALLR.H            | HSPA9     |
| 4665 | 3 | 4.33  | 0.28  | 30/48  | P35659_DEK_HUMAN   | 2  | K.LLASANLEEVMTK.Q                  | DEK       |
| 5925 | 2 | 4.33  | 0.392 | 17/22  | P11021_GRP78_HUMAN | 0  | K.ELEEIVQPIISK.L                   | HSPA5     |
| 7222 | 3 | 4.327 | 0.352 | 28/64  | P35580_MYH10_HUMAN | 3  | R.TQLEELEDLQATEDAK.L               | MYH10     |
| 9448 | 2 | 4.325 | 0.537 | 19/24  | P35659_DEK_HUMAN   | 2  | K.LLASANLEEVMTK.Q                  | DEK       |
| 1536 | 3 | 4.324 | 0.392 | 31/64  | P35659_DEK_HUMAN   | 2  | K.KESESEDSSDEPLIKK.L               | DEK       |
| 5983 | 2 | 4.323 | 0.306 | 18/30  | P62736_ACTA_HUMAN  | 7  | K.YPIEHGIITNWDDMEK.I               | ACTA2     |
| 8520 | 2 | 4.323 | 0.53  | 22/24  | P35659_DEK_HUMAN   | 2  | K.LLASANLEEVMTK.Q                  | DEK       |
| 5302 | 2 | 4.32  | 0.291 | 19/38  | P07477_TRY1_HUMAN  | 10 | R.LGEHNIEVLEGNEQFINAAK.I           | PRSS1     |
| 4895 | 3 | 4.32  | 0.395 | 27/56  | P68400_CSK21_HUMAN | 5  | K.YSEVFEAINITNNEK.V                | CSNK2A1   |
| 7292 | 2 | 4.319 | 0.512 | 18/20  | P12956_XRCC6_HUMAN | 0  | R.DSLIFLVDASK.A                    | XRCC6     |
| 8064 | 2 | 4.317 | 0.499 | 21/26  | P07355_ANXA2_HUMAN | 13 | K.GVDEVTVNLTNR.S                   | ANXA2     |
| 3638 | 3 | 4.316 | 0.252 | 26/48  | P35659_DEK_HUMAN   | 2  | K.LLASANLEEVMTK.Q                  | DEK       |
| 8786 | 2 | 4.316 | 0.534 | 21/24  | P35659_DEK_HUMAN   | 2  | K.LLASANLEEVMTK.Q                  | DEK       |
| 8526 | 2 | 4.312 | 0.545 | 22/40  | P06748_NPM_HUMAN   | 1  | K.MSVQPTVSLGGFEITPPVLR.L           | NPM1      |
| 2865 | 3 | 4.312 | 0.335 | 30/72  | SAV_STRAV          | 0  | R.NAHSATTWSGQYVGGAEAR.I            |           |
| 9032 | 3 | 4.309 | 0.37  | 25/56  | P68400_CSK21_HUMAN | 5  | K.YSEVFEAINITNNEK.V                | CSNK2A1   |
| 7259 | 2 | 4.309 | 0.562 | 21/34  | P35579_MYH9_HUMAN  | 0  | K.LQVELDNVTGLLSQSDSK.S             | MYH9      |
| 5181 | 2 | 4.303 | 0.453 | 20/32  | P11021_GRP78_HUMAN | 0  | K.VTHAVTVTPAYFNDAQR.Q              | HSPA5     |
| 6642 | 2 | 4.301 | 0.471 | 22/26  | P35579_MYH9_HUMAN  | 0  | K.VSHLLGINVTDFTTR.G                | MYH9      |
| 9234 | 2 | 4.296 | 0.569 | 22/24  | P35659_DEK_HUMAN   | 2  | K.LLASANLEEVMTK.Q                  | DEK       |
| 3492 | 2 | 4.291 | 0.509 | 20/24  | P83731_RL24_HUMAN  | 2  | R.AITGASLADIM*AK.R                 | RPL24     |
| 6266 | 2 | 4.288 | 0.493 | 21/24  | P19784_CSK22_HUMAN | 2  | R.HLVSPALDLDLTK.L                  | CSNK2A2   |
| 4666 | 2 | 4.282 | 0.508 | 21/24  | P35659_DEK_HUMAN   | 2  | K.LLASANLEEVMTK.Q                  | DEK       |
| 8406 | 2 | 4.281 | 0.544 | 22/24  | P35659_DEK_HUMAN   | 2  | K.LLASANLEEVMTK.Q                  | DEK       |
| 9353 | 2 | 4.28  | 0.521 | 22/24  | P35659_DEK_HUMAN   | 2  | K.LLASANLEEVMTK.Q                  | DEK       |
| 3357 | 3 | 4.272 | 0.547 | 40/112 | P35659_DEK_HUMAN   | 1  | -M*SASAPAAEGEGTPTQPASEKEPEM*PGPR.E | DEK       |
| 4464 | 3 | 4.266 | 0.302 | 28/48  | P62277_RS13_HUMAN  | 1  | K.KGLTPSQIGVILR.D                  | RPS13     |
| 4032 | 2 | 4.26  | 0.457 | 21/28  | P35579_MYH9_HUMAN  | 0  | R.TEMEDLMSSKDDVGK.S                | MYH9      |
| 7967 | 2 | 4.26  | 0.368 | 21/24  | Q9UHB9_SRP68_HUMAN | 0  | K.DLPDVQELITQVR.S                  | SRP68     |
| 5254 | 2 | 4.26  | 0.215 | 23/30  | P30050_RL12_HUMAN  | 0  | R.QAQIEVPSASALI.K                  | RPL12     |



|      |   |       |       |       |                    |    |                               |         |
|------|---|-------|-------|-------|--------------------|----|-------------------------------|---------|
| 6951 | 2 | 4.255 | 0.54  | 23/28 | P35579_MYH9_HUMAN  | 2  | K.FININPLAQADWAAK.K           | MYH9    |
| 6039 | 2 | 4.253 | 0.541 | 22/24 | P35659_DEK_HUMAN   | 2  | K.LLASANLEEVMTM.K.Q           | DEK     |
| 7478 | 2 | 4.252 | 0.484 | 16/28 | P68400_CSK21_HUMAN | 5  | K.YSEVFEAINITNNEK.V           | CSNK2A1 |
| 5783 | 2 | 4.251 | 0.535 | 23/26 | P11142_HSP7C_HUMAN | 9  | K.SFYPEEVSSM*VLTK.M           | HSPA8   |
| 7670 | 2 | 4.251 | 0.393 | 17/24 | Q8NHW5_RLAOL_HUMAN | 4  | R.GTIELSDVQLIK.T              | RPLPO6  |
| 632  | 2 | 4.25  | 0.496 | 22/30 | P27694_RFA1_HUMAN  | 0  | K.AAGPSLSHTSGGTQSK.V          | RPA1    |
| 9512 | 3 | 4.247 | 0.456 | 30/72 | SAV_STRAV          | 0  | R.NAHSATTWSGQYVGGAEAR.I       |         |
| 7768 | 2 | 4.246 | 0.487 | 18/24 | P68400_CSK21_HUMAN | 3  | R.GGPNIITLADIVK.D             | CSNK2A1 |
| 5157 | 2 | 4.242 | 0.52  | 21/24 | P35659_DEK_HUMAN   | 2  | K.LLASANLEEVMTM*K.Q           | DEK     |
| 5062 | 2 | 4.242 | 0.497 | 21/24 | P35659_DEK_HUMAN   | 2  | K.LLASANLEEVMTM*K.Q           | DEK     |
| 9254 | 2 | 4.242 | 0.552 | 20/24 | P35659_DEK_HUMAN   | 2  | K.LLASANLEEVMTM.K.Q           | DEK     |
| 7561 | 2 | 4.241 | 0.378 | 21/28 | Q71U36_TBA1A_HUMAN | 10 | R.AVFDVLEPTVIDEVR.T           | TUBA1A  |
| 4198 | 3 | 4.24  | 0.458 | 29/64 | P35579_MYH9_HUMAN  | 0  | K.TLEEEAKTHEAQIQEMR.Q         | MYH9    |
| 4565 | 3 | 4.239 | 0.193 | 29/48 | P35659_DEK_HUMAN   | 2  | K.LLASANLEEVMTM*K.Q           | DEK     |
| 6248 | 3 | 4.238 | 0.474 | 31/64 | P35659_DEK_HUMAN   | 2  | R.ILNFLMHPKPSGKPLPK.S         | DEK     |
| 4038 | 3 | 4.237 | 0.504 | 32/80 | P11021_GRP78_HUMAN | 0  | K.LYGSAGPPPTGEEDTAEKDEL.-     | HSPA5   |
| 8596 | 2 | 4.234 | 0.538 | 21/24 | P35659_DEK_HUMAN   | 2  | K.LLASANLEEVMTM.K.Q           | DEK     |
| 3928 | 2 | 4.234 | 0.362 | 20/26 | P35659_DEK_HUMAN   | 2  | K.KVYENPTYDLTER.K             | DEK     |
| 6198 | 2 | 4.234 | 0.461 | 22/40 | SAV1_STRVL         | 2  | R.YDSAPATDGGSGTALGWTVAWK.N    |         |
| 6326 | 2 | 4.233 | 0.456 | 21/24 | P35659_DEK_HUMAN   | 2  | K.LLASANLEEVMTM.K.Q           | DEK     |
| 3370 | 2 | 4.233 | 0.372 | 18/24 | P35659_DEK_HUMAN   | 3  | K.LLYNRPPTVSSLK.K             | DEK     |
| 8612 | 3 | 4.229 | 0.327 | 33/80 | P68400_CSK21_HUMAN | 2  | K.VLGTEDLYDYIDKYNIELDPR.F     | CSNK2A1 |
| 7430 | 3 | 4.228 | 0.242 | 32/88 | P13010_XRCC5_HUMAN | 0  | K.KYAPTEAQLNAVDALIDSM*SLAK.K  | XRCC5   |
| 4622 | 2 | 4.224 | 0.32  | 21/38 | P07477_TRY1_HUMAN  | 10 | R.LGEHNIEVLEGNEQFINAAK.I      | PRSS1   |
| 9138 | 2 | 4.223 | 0.543 | 22/24 | P35659_DEK_HUMAN   | 2  | K.LLASANLEEVMTM.K.Q           | DEK     |
| 3145 | 3 | 4.222 | 0.351 | 28/56 | P35659_DEK_HUMAN   | 2  | K.LKKPPTDEELKETIK.K           | DEK     |
| 3829 | 2 | 4.218 | 0.417 | 19/22 | P62888_RL30_HUMAN  | 1  | R.KSEIYYAM*LAK.T              | RPL30   |
| 5123 | 3 | 4.216 | 0.382 | 26/64 | P11021_GRP78_HUMAN | 0  | K.VTHAVVTPAYFNDAQR.Q          | HSPA5   |
| 8898 | 2 | 4.215 | 0.494 | 20/24 | P35659_DEK_HUMAN   | 2  | K.LLASANLEEVMTM.K.Q           | DEK     |
| 5192 | 2 | 4.214 | 0.421 | 18/24 | P68400_CSK21_HUMAN | 4  | R.EAMEHPYFYTVVK.D             | CSNK2A1 |
| 2487 | 2 | 4.213 | 0.31  | 20/26 | P35659_DEK_HUMAN   | 3  | K.LLYNRPPTVSSLK.K.N           | DEK     |
| 5944 | 3 | 4.212 | 0.412 | 27/80 | SAV1_STRVL         | 2  | R.YDSAPATDGGSGTALGWTVAWK.N    |         |
| 7714 | 2 | 4.211 | 0.531 | 22/40 | SAV1_STRVL         | 2  | R.YDSAPATDGGSGTALGWTVAWK.N    |         |
| 5562 | 2 | 4.209 | 0.572 | 21/24 | P35659_DEK_HUMAN   | 2  | K.LLASANLEEVMTM.K.Q           | DEK     |
| 5061 | 2 | 4.208 | 0.492 | 21/24 | P35659_DEK_HUMAN   | 2  | K.LLASANLEEVMTM*K.Q           | DEK     |
| 3150 | 3 | 4.207 | 0.498 | 30/72 | SAV_STRAV          | 0  | R.NAHSATTWSGQYVGGAEAR.I       |         |
| 8486 | 3 | 4.204 | 0.328 | 28/64 | P31943_HNRH1_HUMAN | 6  | R.ATENDIYNFFSPLNPVR.V         | HNRNPH1 |
| 8584 | 3 | 4.204 | 0.419 | 33/92 | P13010_XRCC5_HUMAN | 0  | K.KDPSGDTAAVFEEGGDVEDLLDM*1.- | XRCC5   |
| 5658 | 3 | 4.201 | 0.254 | 23/48 | P35659_DEK_HUMAN   | 3  | K.KNVGFSGFPFEK.G              | DEK     |
| 6090 | 3 | 4.2   | 0.357 | 26/64 | P68400_CSK21_HUMAN | 5  | R.GKYSEVFEAINITNNEK.V         | CSNK2A1 |
| 4133 | 2 | 4.199 | 0.437 | 18/20 | P35579_MYH9_HUMAN  | 0  | K.VEAQLQELQVK.F               | MYH9    |
| 2218 | 2 | 4.197 | 0.492 | 20/24 | P35659_DEK_HUMAN   | 2  | K.KPPTDEELKETIK.K             | DEK     |
| 5602 | 2 | 4.197 | 0.425 | 24/28 | Q07021_C1QBP_HUMAN | 2  | K.M*SGGWELELNGTEAK.L          | C1QBP   |
| 8384 | 2 | 4.195 | 0.553 | 18/38 | P68400_CSK21_HUMAN | 4  | R.FVHSENQHLVSPEALDFLDK.L      | CSNK2A1 |
| 7354 | 2 | 4.195 | 0.303 | 22/26 | Q07021_C1QBP_HUMAN | 0  | K.AFVDFLSDEIKER.K             | C1QBP   |
| 6071 | 2 | 4.194 | 0.593 | 23/40 | SAV1_STRVL         | 2  | R.YDSAPATDGGSGTALGWTVAWK.N    |         |
| 2949 | 3 | 4.192 | 0.444 | 28/64 | P35579_MYH9_HUMAN  | 0  | K.AKQTLENERGELANEVK.V         | MYH9    |
| 7366 | 3 | 4.192 | 0.31  | 25/72 | P35579_MYH9_HUMAN  | 0  | K.IRELESQISELQEDLESER.A       | MYH9    |
| 6202 | 3 | 4.189 | 0.411 | 28/52 | P35659_DEK_HUMAN   | 3  | K.LLYNRPPTVSSLK.K.N           | DEK     |
| 7668 | 2 | 4.186 | 0.457 | 19/22 | P38646_GRP75_HUMAN | 1  | R.AQFEGIVTDLIR.R              | HSPA9   |
| 6252 | 2 | 4.177 | 0.41  | 20/24 | Q9GL7_WDR12_HUMAN  | 0  | K.GAEFWILTGSDYK.T             | WDR12   |
| 6174 | 3 | 4.174 | 0.311 | 20/44 | P54652_HSP72_HUMAN | 5  | R.ARFEELNADLFR.G              | HSPA2   |
| 6447 | 3 | 4.173 | 0.44  | 28/64 | P35659_DEK_HUMAN   | 2  | R.ILNFLMHPKPSGKPLPK.S         | DEK     |
| 3352 | 3 | 4.171 | 0.553 | 24/56 | P46778_RL21_HUMAN  | 2  | R.VYNYTQHAVGIVVNK.Q           | RPL21   |
| 8503 | 2 | 4.167 | 0.56  | 22/24 | P35659_DEK_HUMAN   | 2  | K.LLASANLEEVMTM.K.Q           | DEK     |
| 5943 | 2 | 4.167 | 0.498 | 21/24 | P35659_DEK_HUMAN   | 2  | K.LLASANLEEVMTM.K.Q           | DEK     |
| 3626 | 2 | 4.166 | 0.537 | 21/24 | P35659_DEK_HUMAN   | 2  | K.LLASANLEEVMTM*K.Q           | DEK     |
| 2791 | 2 | 4.163 | 0.618 | 20/28 | P62829_RL23_HUMAN  | 3  | R.LPAAGVGDMM*VM*ATVK.K        | RPL23   |
| 6122 | 2 | 4.163 | 0.357 | 19/24 | P62906_RL10A_HUMAN | 0  | K.KYDAFLASESLIK.Q             | RPL10A  |
| 5834 | 2 | 4.162 | 0.493 | 20/22 | P68400_CSK21_HUMAN | 3  | K.QLYQTLTDYDIR.F              | CSNK2A1 |
| 1465 | 3 | 4.162 | 0.395 | 28/52 | P19784_CSK22_HUMAN | 0  | R.DVKPHNVMDHQK.K              | CSNK2A2 |
| 3338 | 3 | 4.161 | 0.289 | 30/52 | P35659_DEK_HUMAN   | 2  | K.KLLASANLEEVMTM*K.Q          | DEK     |
| 8710 | 2 | 4.16  | 0.51  | 19/28 | Q9BVP2_GNL3_HUMAN  | 0  | K.VIEASDVVLEVLDR.D            | GNL3    |
| 6474 | 2 | 4.16  | 0.506 | 18/22 | P35659_DEK_HUMAN   | 3  | K.NVGFSGFPFEK.G               | DEK     |
| 8597 | 2 | 4.16  | 0.522 | 22/24 | P35659_DEK_HUMAN   | 2  | K.LLASANLEEVMTM.K.Q           | DEK     |
| 3587 | 2 | 4.156 | 0.44  | 20/24 | P35659_DEK_HUMAN   | 2  | K.VYENPTYDLTER.K              | DEK     |
| 8252 | 2 | 4.155 | 0.365 | 20/32 | P62701_RS4X_HUMAN  | 1  | R.TDITYPAGFMDVISIDK.T         | RPS4X   |
| 5728 | 3 | 4.152 | 0.304 | 27/64 | P67870_CSK2B_HUMAN | 1  | K.IHPM*AYQLQLQAASNFK.S        | CSNK2B  |
| 8692 | 2 | 4.15  | 0.515 | 22/24 | P35659_DEK_HUMAN   | 2  | K.LLASANLEEVMTM.K.Q           | DEK     |
| 3831 | 3 | 4.147 | 0.345 | 27/76 | P24844_MYL9_HUMAN  | 0  | R.ELLTTM*GDRFTDEEVDEM*YR.E    | MYL9    |
| 6107 | 3 | 4.147 | 0.419 | 25/64 | P68400_CSK21_HUMAN | 5  | R.GKYSEVFEAINITNNEK.V         | CSNK2A1 |
| 5142 | 3 | 4.145 | 0.222 | 24/52 | P35659_DEK_HUMAN   | 2  | K.LLASANLEEVMTM.K.Q           | DEK     |
| 5690 | 2 | 4.143 | 0.476 | 22/24 | P35659_DEK_HUMAN   | 3  | K.KNVGFSGFPFEK.G              | DEK     |
| 5002 | 3 | 4.142 | 0.379 | 31/64 | P35659_DEK_HUMAN   | 2  | R.ILNFLM*HPKPSGKPLPK.S        | DEK     |
| 6170 | 3 | 4.141 | 0.371 | 29/72 | SAV_STRAV          | 0  | R.NAHSATTWSGQYVGGAEAR.I       |         |
| 6358 | 3 | 4.139 | 0.319 | 23/48 | P19784_CSK22_HUMAN | 2  | R.HLVSPEALDLDLKL              | CSNK2A2 |
| 9033 | 2 | 4.134 | 0.48  | 20/24 | P35659_DEK_HUMAN   | 2  | K.LLASANLEEVMTM*K.Q           | DEK     |
| 8332 | 2 | 4.132 | 0.332 | 18/26 | P06748_NPM_HUMAN   | 0  | R.MTDQEAIQDLWQWR.K            | NPM1    |
| 6041 | 2 | 4.131 | 0.528 | 22/24 | P35659_DEK_HUMAN   | 2  | K.LLASANLEEVMTM.K.Q           | DEK     |

|      |   |       |       |        |                     |    |                                                |          |
|------|---|-------|-------|--------|---------------------|----|------------------------------------------------|----------|
| 6075 | 2 | 4.128 | 0.303 | 19/38  | P07477_TRY1_HUMAN   | 10 | R.LGEHNIEVLEGNQFINAAK.I                        | PRSS1    |
| 2760 | 3 | 4.127 | 0.381 | 29/72  | SAV_STRAV           | 0  | R.NAHSATTWSGQYVGGAEAR.I                        |          |
| 8567 | 2 | 4.124 | 0.414 | 20/22  | Q43143_DHX15_HUMAN  | 0  | R.TLATDILM*GVLK.E                              | DHX15    |
| 7367 | 3 | 4.122 | 0.475 | 28/80  | SAV1_STRVL          | 2  | R.YDSAPATDGGSTALGWTVAWK.N                      |          |
| 9002 | 3 | 4.122 | 0.379 | 27/72  | SAV_STRAV           | 0  | R.NAHSATTWSGQYVGGAEAR.I                        |          |
| 7108 | 2 | 4.121 | 0.545 | 21/40  | SAV1_STRVL          | 2  | R.YDSAPATDGGSTALGWTVAWK.N                      |          |
| 4281 | 2 | 4.117 | 0.476 | 21/24  | P60660_MYL6_HUMAN   | 10 | K.DQGTIEDYVEGLR.V                              | MYL6     |
| 5049 | 3 | 4.114 | 0.152 | 25/52  | P35659_DEK_HUMAN    | 2  | K.KLLASANLEEVMTK.Q                             | DEK      |
| 2779 | 2 | 4.111 | 0.433 | 18/28  | P35659_DEK_HUMAN    | 2  | K.ESESEDSSDDEPLIK.K                            | DEK      |
| 5956 | 2 | 4.111 | 0.418 | 23/34  | P11142_HSP7C_HUMAN  | 6  | K.TVTNAVTVTPAYFNDSQR.Q                         | HSPA8    |
| 3896 | 2 | 4.11  | 0.453 | 18/20  | P19105_ML12A_HUMAN  | 2  | R.FTDEEVDELYR.E                                | MYL12A   |
| 6570 | 2 | 4.109 | 0.519 | 19/22  | P35659_DEK_HUMAN    | 3  | K.NVGQFSGFPFEK.G                               | DEK      |
| 9050 | 2 | 4.109 | 0.587 | 22/24  | P35659_DEK_HUMAN    | 2  | K.LLASANLEEVMTK.Q                              | DEK      |
| 6201 | 3 | 4.108 | 0.288 | 25/64  | P68400_CSK21_HUMAN  | 5  | R.GKYSEVFEAINITNNEK.V                          | CSNK2A1  |
| 7351 | 2 | 4.108 | 0.562 | 22/24  | P35659_DEK_HUMAN    | 2  | K.LLASANLEEVMTK.Q                              | DEK      |
| 6362 | 2 | 4.104 | 0.482 | 19/24  | P19784_CSK22_HUMAN  | 2  | R.HLVSPREALDLLDK.L                             | CSNK2A2  |
| 7678 | 2 | 4.101 | 0.417 | 17/24  | Q8NHW5_RLAOL_HUMAN  | 4  | R.GTIEILSDVQLIK.T                              | RPLP06   |
| 6108 | 3 | 4.101 | 0.429 | 21/52  | P35659_DEK_HUMAN    | 3  | K.LLYNRPQTVSSSLK.N                             | DEK      |
| 286  | 3 | 4.099 | 0.443 | 35/100 | Q9UHB9_SRP68_HUMAN  | 2  | K.QVPGGGGGGGSGGGGGSGGGGGSGGGR.G                | SRP68    |
| 6131 | 2 | 4.097 | 0.421 | 17/24  | Q8NHW5_RLAOL_HUMAN  | 4  | R.GTIEILSDVQLIK.T                              | RPLP06   |
| 6024 | 2 | 4.082 | 0.426 | 22/26  | P35579_MYH9_HUMAN   | 0  | R.IM*GIPEEEQMGLLR.V                            | MYH9     |
| 5253 | 2 | 4.082 | 0.515 | 19/24  | P35659_DEK_HUMAN    | 2  | K.LLASANLEEVMT*K.Q                             | DEK      |
| 3501 | 3 | 4.079 | 0.427 | 25/72  | SAV_STRAV           | 0  | R.NAHSATTWSGQYVGGAEAR.I                        |          |
| 5666 | 2 | 4.079 | 0.497 | 21/24  | P35659_DEK_HUMAN    | 2  | K.LLASANLEEVMT*K.Q                             | DEK      |
| 3830 | 3 | 4.079 | 0.379 | 24/44  | P62888_RL30_HUMAN   | 1  | R.KSEIEYYAM*LAK.T                              | RPL30    |
| 6320 | 3 | 4.079 | 0.414 | 32/84  | Q99848_EBP2_HUMAN   | 1  | R.LDVTLGPVPEIGGSEAPAPQNK.D                     | EBNA1BP2 |
| 5269 | 2 | 4.073 | 0.415 | 20/22  | P68400_CSK21_HUMAN  | 3  | K.QLYQTLTDYDIR.F                               | CSNK2A1  |
| 6197 | 3 | 4.07  | 0.303 | 26/56  | P68400_CSK21_HUMAN  | 5  | K.YSEVFEAINITNNEK.V                            | CSNK2A1  |
| 6247 | 3 | 4.066 | 0.264 | 26/64  | P19784_CSK22_HUMAN  | 1  | R.GKYSEVFEAINITNNER.V                          | CSNK2A2  |
| 6046 | 2 | 4.066 | 0.514 | 20/24  | P52272_HNRPM_HUMAN  | 4  | R.LGSTVFVANLDYK.V                              | HNRNPM   |
| 6695 | 2 | 4.066 | 0.511 | 22/24  | P35659_DEK_HUMAN    | 2  | K.LLASANLEEVMTK.Q                              | DEK      |
| 6230 | 2 | 4.061 | 0.538 | 22/24  | P35659_DEK_HUMAN    | 2  | K.LLASANLEEVMTK.Q                              | DEK      |
| 8396 | 3 | 4.06  | 0.358 | 26/72  | SAV_STRAV           | 0  | R.NAHSATTWSGQYVGGAEAR.I                        |          |
| 8046 | 2 | 4.059 | 0.44  | 19/22  | P35659_DEK_HUMAN    | 3  | K.NVGQFSGFPFEK.G                               | DEK      |
| 8618 | 2 | 4.059 | 0.518 | 21/24  | P35659_DEK_HUMAN    | 2  | K.LLASANLEEVMT*K.Q                             | DEK      |
| 7851 | 2 | 4.053 | 0.532 | 17/40  | SAV1_STRVL          | 2  | R.YDSAPATDGGSTALGWTVAWK.N                      |          |
| 6295 | 3 | 4.053 | 0.325 | 23/64  | P68400_CSK21_HUMAN  | 5  | R.GKYSEVFEAINITNNEK.V                          | CSNK2A1  |
| 3786 | 2 | 4.05  | 0.377 | 17/18  | P35659_DEK_HUMAN    | 1  | R.LTMQVSSLQR.E                                 | DEK      |
| 1930 | 2 | 4.047 | 0.485 | 20/26  | P35659_DEK_HUMAN    | 2  | K.KPPTDEELKETIKK.L                             | DEK      |
| 4252 | 2 | 4.044 | 0.412 | 21/24  | Q07021_C1QBP_HUMAN  | 2  | R.EVSFQSTGESEWK.D                              | C1QBP    |
| 5520 | 2 | 4.044 | 0.4   | 21/28  | Q07021_C1QBP_HUMAN  | 2  | K.M*SGGWELELNGTEAK.L                           | C1QBP    |
| 5775 | 2 | 4.042 | 0.402 | 17/20  | D6RDA2_D6RDA2_HUMAN | 0  | R.ILNFLMHPKPS.-                                | DEK      |
| 8427 | 3 | 4.04  | 0.369 | 25/80  | P06748_NPM_HUMAN    | 1  | K.M*SVQPTVSLGGFEITPPVVL.R                      | NPM1     |
| 8509 | 2 | 4.037 | 0.436 | 19/22  | P19784_CSK22_HUMAN  | 1  | K.QLYQILTDYDIR.F                               | CSNK2A2  |
| 6405 | 2 | 4.036 | 0.434 | 24/26  | P11021_GRP78_HUMAN  | 0  | K.TFAPEEISAM*VLTK.M                            | HSPA5    |
| 7797 | 2 | 4.036 | 0.521 | 21/24  | P35659_DEK_HUMAN    | 2  | K.LLASANLEEVMTK.Q                              | DEK      |
| 2026 | 2 | 4.032 | 0.535 | 20/26  | P35659_DEK_HUMAN    | 2  | K.KPPTDEELKETIKK.L                             | DEK      |
| 6067 | 3 | 4.022 | 0.409 | 34/80  | SAV1_STRVL          | 2  | R.YDSAPATDGGSTALGWTVAWK.N                      |          |
| 9045 | 2 | 4.017 | 0.393 | 18/40  | P60709_ACTB_HUMAN   | 1  | K.DLYANTVLSGGTTM*YPIADR.M                      | ACTB     |
| 8725 | 3 | 4.015 | 0.382 | 28/76  | Q9UHB9_SRP68_HUMAN  | 0  | R.SGGTEGLLAEKLEALITQTR.A                       | SRP68    |
| 4314 | 2 | 4.012 | 0.549 | 19/24  | P35659_DEK_HUMAN    | 2  | K.LLASANLEEVMTK.Q                              | DEK      |
| 5279 | 2 | 4.012 | 0.365 | 21/22  | P11021_GRP78_HUMAN  | 0  | K.DAGTIAGLNVMR.I                               | HSPA5    |
| 9027 | 3 | 4.01  | 0.323 | 29/80  | P60709_ACTB_HUMAN   | 1  | K.DLYANTVLSGGTTM*YPIADR.M                      | ACTB     |
| 1227 | 3 | 4.01  | 0.454 | 25/56  | P19784_CSK22_HUMAN  | 0  | R.DVKPHNVM*IDHQKK.L                            | CSNK2A2  |
| 4917 | 2 | 4.004 | 0.448 | 20/32  | P35659_DEK_HUMAN    | 2  | R.ILNFLM*HPKPSGKPLP.K.S                        | DEK      |
| 7962 | 3 | 4.003 | 0.318 | 25/68  | P12268_IMDH2_HUMAN  | 2  | K.GKLPVNEDELVAIAR.T                            | IMPDH2   |
| 6536 | 3 | 4.002 | 0.437 | 23/72  | P35579_MYH9_HUMAN   | 0  | K.NM*DPLNDNIATLLHQSSDK.F                       | MYH9     |
| 3003 | 3 | 4.002 | 0.484 | 36/112 | P35659_DEK_HUMAN    | 1  | -.M*SASAPAAEGEGTPTQPASEKEPEM*PGPR.E            | DEK      |
| 6991 | 2 | 3.994 | 0.53  | 20/40  | SAV1_STRVL          | 2  | R.YDSAPATDGGSTALGWTVAWK.N                      |          |
| 7834 | 3 | 3.992 | 0.257 | 31/72  | SAV_STRAV           | 0  | R.NAHSATTWSGQYVGGAEAR.I                        |          |
| 9417 | 3 | 3.988 | 0.393 | 29/72  | SAV_STRAV           | 0  | R.NAHSATTWSGQYVGGAEAR.I                        |          |
| 6468 | 2 | 3.986 | 0.52  | 19/24  | P35659_DEK_HUMAN    | 2  | K.LLASANLEEVMTK.Q                              | DEK      |
| 7475 | 2 | 3.984 | 0.436 | 20/26  | P18124_RL7_HUMAN    | 1  | R.IVEPIYAWGYPNLK.S                             | RPL7     |
| 4762 | 2 | 3.983 | 0.503 | 21/24  | P35659_DEK_HUMAN    | 2  | K.LLASANLEEVMT*K.Q                             | DEK      |
| 9398 | 2 | 3.978 | 0.469 | 18/24  | P35659_DEK_HUMAN    | 2  | K.LLASANLEEVMT*K.Q                             | DEK      |
| 9013 | 3 | 3.976 | 0.267 | 26/52  | P35659_DEK_HUMAN    | 2  | K.LLASANLEEVMT*K.Q                             | DEK      |
| 7989 | 3 | 3.975 | 0.407 | 29/60  | P35579_MYH9_HUMAN   | 0  | R.LQQELDLLVLDLHQR.Q                            | MYH9     |
| 6512 | 2 | 3.97  | 0.473 | 19/34  | Q04837_SSBP_HUMAN   | 0  | R.QATTIADNIIFLSDQTK.E                          | SSBP1    |
| 6055 | 3 | 3.97  | 0.194 | 27/48  | P62906_RL10A_HUMAN  | 0  | K.KYDAFLASESLIK.Q                              | RPL10A   |
| 5292 | 3 | 3.969 | 0.426 | 30/144 | P11142_HSP7C_HUMAN  | 3  | K.LYQSAGGM*PGGM*PGGFPGGGAPPSGGAS<br>SGTIEEVD.- | HSPA8    |
| 2099 | 3 | 3.967 | 0.339 | 26/60  | P35659_DEK_HUMAN    | 2  | K.KESESEDSSDDEPLIK.K                           | DEK      |
| 7999 | 2 | 3.961 | 0.513 | 22/24  | P35659_DEK_HUMAN    | 2  | K.LLASANLEEVMTK.Q                              | DEK      |
| 6936 | 2 | 3.958 | 0.589 | 22/26  | P11142_HSP7C_HUMAN  | 9  | K.SFYPEEVSSMVLTK.M                             | HSPA8    |
| 5000 | 2 | 3.957 | 0.52  | 19/30  | P62736_ACTA_HUMAN   | 9  | K.SYELPDGQVITIGNER.F                           | ACTA2    |

|      |   |       |       |        |                     |    |                                     |           |
|------|---|-------|-------|--------|---------------------|----|-------------------------------------|-----------|
| 6806 | 2 | 3.954 | 0.518 | 20/24  | P35659_DEK_HUMAN    | 2  | K.LLASANLEEVMTK.Q                   | DEK       |
| 5120 | 2 | 3.952 | 0.236 | 19/38  | P07477_TRY1_HUMAN   | 10 | R.LGEHNIEVLEGNEQFINAAK.I            | PRSS1     |
| 6160 | 3 | 3.952 | 0.271 | 24/64  | P19784_CSK22_HUMAN  | 1  | R.GKYSEVFEAINITNNER.V               | CSNK2A2   |
| 7133 | 2 | 3.952 | 0.547 | 20/24  | P35659_DEK_HUMAN    | 2  | K.LLASANLEEVMTK.Q                   | DEK       |
| 5952 | 2 | 3.948 | 0.582 | 22/34  | SAV1_STRVL          | 1  | R.INTQWLLTSGTTEANAWK.S              |           |
| 2967 | 2 | 3.941 | 0.477 | 21/28  | P35659_DEK_HUMAN    | 2  | K.LKKPPTDEELKETIK.K                 | DEK       |
| 8908 | 2 | 3.939 | 0.519 | 21/24  | P35659_DEK_HUMAN    | 2  | K.LLASANLEEVMT*K.Q                  | DEK       |
| 5112 | 2 | 3.938 | 0.462 | 20/22  | P05387_RLA2_HUMAN   | 1  | K.NIEDVIAQGIGK.L                    | RPLP2     |
| 3319 | 3 | 3.934 | 0.356 | 26/64  | P35579_MYH9_HUMAN   | 0  | K.TLEEEAKTHEAQIQEM*R.Q              | MYH9      |
| 5844 | 3 | 3.934 | 0.275 | 28/60  | P62736_ACTA_HUMAN   | 7  | K.YPIEHGITNWDDMEK.I                 | ACTA2     |
| 6814 | 3 | 3.928 | 0.317 | 26/48  | P68400_CSK21_HUMAN  | 2  | K.VLGTEDLYDYDK.Y                    | CSNK2A1   |
| 8144 | 3 | 3.927 | 0.276 | 26/88  | P67870_CSK2B_HUMAN  | 2  | R.VYC#ENQPMPLPIGLSDIPGEAMVK.L       | CSNK2B    |
| 7458 | 2 | 3.925 | 0.557 | 20/24  | P35659_DEK_HUMAN    | 2  | K.LLASANLEEVMTK.Q                   | DEK       |
| 7218 | 2 | 3.923 | 0.277 | 15/24  | P35659_DEK_HUMAN    | 3  | K.LLYNRPQTVSSLK.K                   | DEK       |
| 4844 | 2 | 3.922 | 0.434 | 17/20  | D6RDA2_D6RDA2_HUMAN | 0  | R.ILNFLM*HPKPS.-                    | DEK       |
| 4554 | 2 | 3.916 | 0.495 | 21/24  | P35659_DEK_HUMAN    | 2  | K.VYENYPTYDLTER.K                   | DEK       |
| 7443 | 2 | 3.916 | 0.541 | 21/24  | P35659_DEK_HUMAN    | 2  | K.LLASANLEEVMTK.Q                   | DEK       |
| 6690 | 2 | 3.914 | 0.534 | 21/24  | P35659_DEK_HUMAN    | 2  | K.LLASANLEEVMTK.Q                   | DEK       |
| 1677 | 3 | 3.911 | 0.459 | 29/80  | P35659_DEK_HUMAN    | 1  | -.MSASAPAAEGEGTPTQPASEK.E           | DEK       |
| 3993 | 2 | 3.908 | 0.327 | 18/20  | P35580_MYH10_HUMAN  | 1  | R.AGVLAHLEER.D                      | MYH10     |
| 1675 | 3 | 3.906 | 0.486 | 37/112 | P35659_DEK_HUMAN    | 1  | -.M*SASAPAAEGEGTPTQPASEKEPEM*PGPR.E | DEK       |
| 7411 | 2 | 3.906 | 0.436 | 18/20  | P05186_PPBT_HUMAN   | 0  | R.LDGLDLVDTWK.S                     | ALPL      |
| 6134 | 2 | 3.902 | 0.287 | 16/26  | P62899_RL31_HUMAN   | 4  | K.LYTLVTVYVPVTTFK.N                 | RPL31     |
| 6634 | 3 | 3.899 | 0.385 | 27/72  | SAV_STRAV           | 0  | R.NAHSATTWSGQYVGGAEAR.I             |           |
| 4216 | 2 | 3.897 | 0.433 | 20/26  | P62913_RL11_HUMAN   | 2  | K.VLEQLTGQTPVFSK.A                  | RPL11     |
| 2223 | 2 | 3.896 | 0.378 | 17/26  | P35659_DEK_HUMAN    | 2  | K.KPPTDEELKETIKK.L                  | DEK       |
| 3066 | 3 | 3.895 | 0.238 | 31/56  | Q04837_SSBP_HUMAN   | 2  | R.SGDSEVYQLGDVVSQK.T                | SSBP1     |
| 1230 | 3 | 3.893 | 0.12  | 26/44  | P35579_MYH9_HUMAN   | 0  | K.RQLEEAEEEEAQR.A                   | MYH9      |
| 3250 | 3 | 3.891 | 0.367 | 28/72  | SAV_STRAV           | 0  | R.NAHSATTWSGQYVGGAEAR.I             |           |
| 8459 | 2 | 3.891 | 0.538 | 18/40  | SAV1_STRVL          | 2  | R.YDSAPATDGGSGTALGWTVAWK.N          |           |
| 3717 | 2 | 3.885 | 0.485 | 21/24  | P35659_DEK_HUMAN    | 2  | K.LLASANLEEVMT*K.Q                  | DEK       |
| 6549 | 2 | 3.884 | 0.553 | 20/40  | SAV1_STRVL          | 2  | R.YDSAPATDGGSGTALGWTVAWK.N          |           |
| 4355 | 2 | 3.884 | 0.413 | 19/24  | P35659_DEK_HUMAN    | 2  | K.VYENYPTYDLTER.K                   | DEK       |
| 9299 | 2 | 3.882 | 0.606 | 15/36  | SAV_STRAV           | 0  | R.NAHSATTWSGQYVGGAEAR.I             |           |
| 4584 | 2 | 3.881 | 0.462 | 17/24  | P68400_CSK21_HUMAN  | 4  | R.EAM*EHYPFYTVVK.D                  | CSNK2A1   |
| 5421 | 2 | 3.879 | 0.302 | 19/40  | P60709_ACTB_HUMAN   | 1  | K.DLYANTVLSGGTMYPGIADR.M            | ACTB      |
| 7607 | 2 | 3.878 | 0.41  | 18/20  | Q07021_C1QBP_HUMAN  | 0  | K.AFVDFLSDEIK.E                     | C1QBP     |
| 3786 | 2 | 3.878 | 0.368 | 17/20  | P20671_H2A1D_HUMAN  | 7  | R.NDEELNKLLGK.V                     | HIST1H2AD |
| 5682 | 2 | 3.876 | 0.113 | 21/28  | Q13885_TBB2A_HUMAN  | 9  | R.AILVDLEPGTM*DSVR.S                | TUBB2A    |
| 7897 | 3 | 3.874 | 0.466 | 30/72  | P68400_CSK21_HUMAN  | 3  | R.LIDWGLAEFYHPGQEYNVR.V             | CSNK2A1   |
| 9047 | 3 | 3.874 | 0.417 | 29/72  | P68400_CSK21_HUMAN  | 3  | R.LIDWGLAEFYHPGQEYNVR.V             | CSNK2A1   |
| 1389 | 2 | 3.874 | 0.348 | 19/20  | P36578_RL4_HUMAN    | 2  | K.AAAAAAALQAK.S                     | RPL4      |
| 5991 | 2 | 3.872 | 0.38  | 20/24  | P19784_CSK22_HUMAN  | 2  | K.VLGTTEELYGYLKK.Y                  | CSNK2A2   |
| 7465 | 2 | 3.865 | 0.551 | 15/36  | SAV_STRAV           | 0  | R.NAHSATTWSGQYVGGAEAR.I             |           |
| 4342 | 2 | 3.865 | 0.43  | 21/24  | Q07021_C1QBP_HUMAN  | 2  | R.EVSFQSTGESEWK.D                   | C1QBP     |
| 2878 | 2 | 3.863 | 0.549 | 18/26  | P35579_MYH9_HUMAN   | 0  | R.ELEDATETADAMNR.E                  | MYH9      |
| 5882 | 3 | 3.86  | 0.334 | 27/56  | P33778_H2B1B_HUMAN  | 14 | K.AM*GIM*NSFVNDIFER.I               | HIST1H2BB |
| 7933 | 3 | 3.856 | 0.471 | 28/72  | P27694_RFA1_HUMAN   | 1  | R.GWFDAGEGQALDGVISDLK.S             | RFA1      |
| 6653 | 2 | 3.856 | 0.597 | 19/40  | SAV1_STRVL          | 2  | R.YDSAPATDGGSGTALGWTVAWK.N          |           |
| 2859 | 2 | 3.855 | 0.341 | 20/26  | Q71UI9_H2AV_HUMAN   | 1  | K.ATIAGGGVIPHIIK.S                  | H2AFV     |
| 7471 | 2 | 3.855 | 0.397 | 18/24  | P10809_CH60_HUMAN   | 2  | K.TLNDELEIIEGKM.F                   | HSPD1     |
| 4363 | 3 | 3.854 | 0.275 | 32/68  | P07355_ANXA2_HUMAN  | 8  | R.RAEDGSVIDYELIDQDAR.D              | ANXA2     |
| 6933 | 2 | 3.853 | 0.588 | 21/24  | P35659_DEK_HUMAN    | 2  | K.LLASANLEEVMTK.Q                   | DEK       |
| 6790 | 2 | 3.853 | 0.382 | 20/36  | P04908_H2A1B_HUMAN  | 10 | R.VTIAQGGVLPNIQAVLLPK.K             | HIST1H2AB |
| 8015 | 2 | 3.851 | 0.535 | 19/36  | P68400_CSK21_HUMAN  | 3  | R.LIDWGLAEFYHPGQEYNVR.V             | CSNK2A1   |
| 6069 | 3 | 3.85  | 0.384 | 25/72  | SAV_STRAV           | 0  | R.NAHSATTWSGQYVGGAEAR.I             |           |
| 5917 | 3 | 3.85  | 0.357 | 33/68  | P35579_MYH9_HUMAN   | 0  | K.SM*EAEM*IQLQEELAAER.A             | MYH9      |
| 6386 | 3 | 3.85  | 0.41  | 26/80  | SAV1_STRVL          | 2  | R.YDSAPATDGGSGTALGWTVAWK.N          |           |
| 1369 | 3 | 3.844 | 0.453 | 26/80  | P35659_DEK_HUMAN    | 2  | R.EESEEEDDEDEEEEEEKEK.S             | DEK       |
| 8910 | 3 | 3.841 | 0.312 | 29/88  | P13010_XRCC5_HUMAN  | 0  | K.KYAPTEAQLNAVDALIDMSLAK.K          | XRCC5     |
| 6919 | 3 | 3.84  | 0.346 | 28/72  | SAV_STRAV           | 0  | R.NAHSATTWSGQYVGGAEAR.I             |           |
| 8042 | 3 | 3.838 | 0.407 | 24/72  | P19784_CSK22_HUMAN  | 1  | R.LIDWGLAEFYHPAQEYNVR.V             | CSNK2A2   |
| 2727 | 3 | 3.837 | 0.402 | 37/112 | P35659_DEK_HUMAN    | 1  | -.M*SASAPAAEGEGTPTQPASEKEPEMPGPR.E  | DEK       |
| 4300 | 2 | 3.835 | 0.402 | 17/20  | P11142_HSP7C_HUMAN  | 5  | K.NSLESYAFNM*K.A                    | HSPA8     |
| 8680 | 3 | 3.833 | 0.403 | 27/72  | SAV_STRAV           | 0  | R.NAHSATTWSGQYVGGAEAR.I             |           |
| 6575 | 2 | 3.833 | 0.3   | 21/24  | P27635_RL10_HUMAN   | 3  | K.FNADEFEDMVAEK.R                   | RPL10     |
| 6951 | 3 | 3.833 | 0.371 | 23/60  | P05386_RLA1_HUMAN   | 0  | K.AAGVNVEFPWFPLFAK.A                | RPLP1     |
| 6567 | 2 | 3.832 | 0.446 | 19/24  | P35659_DEK_HUMAN    | 2  | K.LLASANLEEVMTK.Q                   | DEK       |
| 1832 | 2 | 3.83  | 0.53  | 19/26  | P35659_DEK_HUMAN    | 2  | K.KPPTDEELKETIKK.L                  | DEK       |
| 7863 | 2 | 3.829 | 0.465 | 18/24  | P68400_CSK21_HUMAN  | 3  | R.GGPNITLADIVK.D                    | CSNK2A1   |
| 7432 | 2 | 3.828 | 0.508 | 18/20  | Q08945_SSRP1_HUMAN  | 0  | R.FDEISFVNFR.G                      | SSRP1     |
| 5597 | 3 | 3.826 | 0.433 | 27/68  | Q9BYX7_ACTBM_HUMAN  | 3  | R.VAPEEHPILLTEAPLNPK.A              | POTEKP    |
| 3008 | 3 | 3.823 | 0.44  | 37/112 | P35659_DEK_HUMAN    | 1  | -.MSASAPAAEGEGTPTQPASEKEPEMPGPR.E   | DEK       |

|      |   |       |       |        |                     |    |                                    |          |
|------|---|-------|-------|--------|---------------------|----|------------------------------------|----------|
| 5560 | 3 | 3.823 | 0.302 | 24/48  | P35659_DEK_HUMAN    | 3  | K.KNVGFSGFPFEK.G                   | DEK      |
| 7652 | 2 | 3.822 | 0.533 | 22/24  | P35659_DEK_HUMAN    | 2  | K.LLASANLEEVMTK.Q                  | DEK      |
| 2181 | 3 | 3.817 | 0.503 | 30/112 | P35659_DEK_HUMAN    | 1  | -.MSASAPAAEGEGTPTQPASEKEPEM*PGPR.E | DEK      |
| 2267 | 2 | 3.816 | 0.256 | 19/28  | P35579_MYH9_HUMAN   | 0  | R.TEMEDLM*SSKDDVVGK.S              | MYH9     |
| 7565 | 2 | 3.814 | 0.495 | 22/24  | P35659_DEK_HUMAN    | 2  | K.LLASANLEEVMTK.Q                  | DEK      |
| 7036 | 2 | 3.805 | 0.545 | 21/24  | P35659_DEK_HUMAN    | 2  | K.LLASANLEEVMTK.Q                  | DEK      |
| 8800 | 3 | 3.805 | 0.308 | 26/84  | P68400_CSK21_HUMAN  | 5  | R.EYWDYESHVVVEWGNQDDYQLVR.K        | CSNK2A1  |
| 3131 | 2 | 3.801 | 0.512 | 19/24  | P35030_TRY3_HUMAN   | 1  | K.VLEGNEQFINAAK.I                  | PRSS3    |
| 5565 | 3 | 3.8   | 0.211 | 22/68  | Q71U36_TBA1A_HUMAN  | 9  | K.VGINYQPPTVVPGGDLAK.V             | TUBA1A   |
| 7523 | 2 | 3.8   | 0.38  | 19/28  | Q16643_DREB_HUMAN   | 3  | K.YVLINWVGEDVDPAR.K                | DBN1     |
| 6458 | 3 | 3.798 | 0.431 | 31/72  | SAV_STRAV           | 0  | R.NAHSATTWSGQYVGGAEAR.I            |          |
| 6484 | 2 | 3.797 | 0.349 | 16/28  | Q04837_SSBP_HUMAN   | 2  | K.NPVTFISLATNEM*WR.S               | SSBP1    |
| 9292 | 2 | 3.797 | 0.514 | 18/24  | P35659_DEK_HUMAN    | 2  | K.LLASANLEEVMT*K.Q                 | DEK      |
| 3689 | 2 | 3.794 | 0.46  | 18/24  | P35659_DEK_HUMAN    | 2  | K.VYENYPTDYLTER.K                  | DEK      |
| 3869 | 2 | 3.793 | 0.406 | 20/22  | P11021_GRP78_HUMAN  | 0  | K.DAGTIAGLNVN*RI                   | HSPA5    |
| 1994 | 3 | 3.792 | 0.417 | 25/52  | P35659_DEK_HUMAN    | 2  | K.KPPTDEELKETIKK.L                 | DEK      |
| 409  | 2 | 3.79  | 0.358 | 16/20  | P35579_MYH9_HUMAN   | 0  | R.NAEQYKQDQADK.A                   | MYH9     |
| 3901 | 2 | 3.789 | 0.526 | 16/22  | IGH1M_MOUSE         | 0  | R.VNSAAFPAPIEK.T                   | Ighg1    |
| 3978 | 2 | 3.787 | 0.394 | 17/18  | P35659_DEK_HUMAN    | 1  | R.LTMQVSSLQR.E                     | DEK      |
| 4534 | 2 | 3.787 | 0.406 | 17/22  | P62304_RUXE_HUMAN   | 1  | K.GDNITLLQSVSN.-                   | SNRPE    |
| 2803 | 3 | 3.784 | 0.443 | 25/48  | O43143_DHX15_HUMAN  | 0  | R.HRLDLGEDYPSGK.K                  | DHX15    |
| 3602 | 2 | 3.783 | 0.435 | 19/24  | P62750_RL23A_HUMAN  | 5  | R.LAPDYDALDVANK.I                  | RPL23A   |
| 5327 | 2 | 3.781 | 0.444 | 20/30  | P68400_CSK21_HUMAN  | 2  | R.KEPFFHGHNDYDQLVR.I               | CSNK2A1  |
| 5027 | 3 | 3.779 | 0.34  | 24/60  | P67079_ACTB_HUMAN   | 11 | K.YPIEHGIVTNWDDM*EK.I              | ACTB     |
| 5352 | 2 | 3.778 | 0.205 | 19/30  | P30050_RL12_HUMAN   | 0  | R.QAQIEVPSASALI.K                  | RPL12    |
| 7118 | 2 | 3.778 | 0.243 | 18/28  | Q9NW13_RBM28_HUMAN  | 2  | R.GFGYVTFMS*LEDVQR.A               | RBM28    |
| 3358 | 3 | 3.778 | 0.432 | 33/112 | P35659_DEK_HUMAN    | 1  | -.MSASAPAAEGEGTPTQPASEKEPEM*PGPR.E | DEK      |
| 292  | 3 | 3.777 | 0.429 | 21/44  | P62750_RL23A_HUMAN  | 0  | K.KEAPAPPKAEK.A                    | RPL23A   |
| 8128 | 2 | 3.772 | 0.512 | 21/24  | P35659_DEK_HUMAN    | 2  | K.LLASANLEEVMT*K.Q                 | DEK      |
| 6521 | 3 | 3.77  | 0.343 | 19/44  | P35659_DEK_HUMAN    | 3  | K.NVGFSGFPFEK.G                    | DEK      |
| 8135 | 3 | 3.767 | 0.346 | 31/76  | P68400_CSK21_HUMAN  | 4  | R.FVHSENQHLVSPALDFLDK.L            | CSNK2A1  |
| 3658 | 2 | 3.766 | 0.411 | 20/22  | P11021_GRP78_HUMAN  | 0  | R.TWNDPVQQDIK.F                    | HSPA5    |
| 3882 | 2 | 3.763 | 0.33  | 17/18  | P35659_DEK_HUMAN    | 1  | R.LTMQVSSLQR.E                     | DEK      |
| 5541 | 3 | 3.76  | 0.37  | 24/64  | P35659_DEK_HUMAN    | 2  | R.ILNFLM*HPKPSGKPLK.S              | DEK      |
| 3840 | 2 | 3.76  | 0.332 | 19/28  | P04406_G3P_HUMAN    | 1  | R.GALQNIIPASTGAAK.A                | GAPDH    |
| 4456 | 2 | 3.76  | 0.415 | 19/24  | P62424_RL7A_HUMAN   | 2  | R.AGVNTVTTLVENK.K                  | RPL7A    |
| 8585 | 3 | 3.755 | 0.309 | 27/68  | Q13885_TBB2A_HUMAN  | 8  | K.GHYTEGAELVDSVLDVVR.K             | TUBB2A   |
| 9198 | 3 | 3.753 | 0.322 | 26/64  | P68400_CSK21_HUMAN  | 5  | R.GKYSEVFEAINITNNEK.V              | CSNK2A1  |
| 5054 | 2 | 3.749 | 0.437 | 17/30  | P62736_ACTA_HUMAN   | 7  | K.YPIEHGIVTNWDDM*EK.I              | ACTA2    |
| 5639 | 3 | 3.748 | 0.291 | 25/60  | P62987_RL40_HUMAN   | 22 | K.TITLEVEPSPDIENVK.A               | UBA52    |
| 2344 | 3 | 3.743 | 0.326 | 25/48  | P35579_MYH9_HUMAN   | 0  | K.NKHEAM*ITDLEER.L                 | MYH9     |
| 5051 | 3 | 3.74  | 0.234 | 24/44  | P05387_RLA2_HUMAN   | 1  | K.NIEDVIAQGGIGK.L                  | RPLP2    |
| 8315 | 2 | 3.736 | 0.417 | 18/22  | P35659_DEK_HUMAN    | 3  | K.NVGFSGFPFEK.G                    | DEK      |
| 3973 | 2 | 3.731 | 0.419 | 20/24  | P10599_THIO_HUMAN   | 0  | K.TAFQEALDAAGDK.L                  | TXN      |
| 5109 | 2 | 3.731 | 0.541 | 18/22  | P35659_DEK_HUMAN    | 3  | K.NVGFSGFPFEK.G                    | DEK      |
| 8336 | 3 | 3.729 | 0.369 | 20/60  | P12268_IMDH2_HUMAN  | 2  | K.LPIVNEDELVAIAR.T                 | IMPDH2   |
| 4956 | 3 | 3.729 | 0.221 | 26/52  | P35579_MYH9_HUMAN   | 0  | R.IM*GIPEEEQM*GLLR.V               | MYH9     |
| 8620 | 3 | 3.728 | 0.265 | 26/48  | Q9UGN5_PARP2_HUMAN  | 1  | K.YYLIQLLEDDAQR.N                  | PARP2    |
| 7927 | 2 | 3.726 | 0.537 | 17/34  | P11021_GRP78_HUMAN  | 0  | R.IEIESFYEGEDFSETLTR.A             | HSPA5    |
| 1266 | 3 | 3.726 | 0.438 | 27/80  | P35659_DEK_HUMAN    | 2  | R.EESEEEEEDEDEEEEEEEKEK.S          | DEK      |
| 6579 | 3 | 3.726 | 0.213 | 27/76  | P07477_TRY1_HUMAN   | 10 | R.LGEHNIEVLEGNQFINAAK.I            | PRSS1    |
| 5145 | 2 | 3.726 | 0.365 | 19/20  | P18124_RL7_HUMAN    | 1  | R.IALTDNALIAR.S                    | RPL7     |
| 5914 | 3 | 3.723 | 0.324 | 22/44  | P68400_CSK21_HUMAN  | 3  | K.QLYQTLTDYDIR.F                   | CSNK2A1  |
| 8197 | 2 | 3.722 | 0.463 | 20/22  | P35659_DEK_HUMAN    | 3  | K.NVGFSGFPFEK.G                    | DEK      |
| 4570 | 2 | 3.716 | 0.477 | 18/22  | P62805_H4_HUMAN     | 0  | K.TVTAM*DVVYALK.R                  | HIST1H4A |
| 2409 | 2 | 3.715 | 0.362 | 18/20  | P19784_CSK22_HUMAN  | 2  | K.LIDTVKDPVSK.T                    | CSNK2A2  |
| 4819 | 2 | 3.715 | 0.469 | 20/32  | P35659_DEK_HUMAN    | 2  | R.ILNFLM*HPKPSGKPLK.S              | DEK      |
| 1600 | 3 | 3.713 | 0.33  | 27/52  | P35579_MYH9_HUMAN   | 0  | R.ELEDATETADAM*NR.E                | MYH9     |
| 7650 | 2 | 3.713 | 0.41  | 16/34  | P68400_CSK21_HUMAN  | 3  | R.GGPNITLADIVKDPVSR.T              | CSNK2A1  |
| 7010 | 3 | 3.713 | 0.338 | 29/72  | SAV_STRAV           | 0  | R.NAHSATTWSGQYVGGAEAR.I            |          |
| 3849 | 3 | 3.711 | 0.344 | 26/72  | P35579_MYH9_HUMAN   | 0  | R.QAQERDELADIANSSGK.G              | MYH9     |
| 5664 | 3 | 3.708 | 0.32  | 30/84  | Q15233_NONO_HUMAN   | 0  | R.FGQAATM*EGIGAIGGTPPAFNR.A        | NONO     |
| 6366 | 2 | 3.706 | 0.265 | 19/26  | Q8NHW5_RLAOL_HUMAN  | 11 | K.EDLTEIRDM*LLANK.V                | RPLPOP6  |
| 1018 | 3 | 3.698 | 0.314 | 20/40  | P62736_ACTA_HUMAN   | 22 | R.HQGVM*VGMGQK.D                   | ACTA2    |
| 6774 | 2 | 3.695 | 0.276 | 16/18  | P35659_DEK_HUMAN    | 3  | K.SIC#EVLDLER.S                    | DEK      |
| 5924 | 2 | 3.693 | 0.456 | 22/26  | P35579_MYH9_HUMAN   | 0  | R.IMGIPEEEQM*GLLR.V                | MYH9     |
| 2893 | 3 | 3.69  | 0.399 | 30/112 | P35659_DEK_HUMAN    | 1  | -.M*SASAPAAEGEGTPTQPASEKEPEMPGPR.E | DEK      |
| 5229 | 2 | 3.689 | 0.484 | 18/20  | P62266_RS23_HUMAN   | 0  | K.VANVSLALYK.G                     | RPS23    |
| 7364 | 2 | 3.687 | 0.497 | 18/20  | MOQYS1_MOQYS1_HUMAN | 0  | -.XEVQVLVLDGR.G                    | RPL13A   |
| 6361 | 3 | 3.685 | 0.335 | 25/72  | SAV_STRAV           | 0  | R.NAHSATTWSGQYVGGAEAR.I            |          |
| 6427 | 3 | 3.684 | 0.361 | 20/44  | P35659_DEK_HUMAN    | 3  | K.NVGFSGFPFEK.G                    | DEK      |
| 3823 | 2 | 3.683 | 0.466 | 19/24  | P35579_MYH9_HUMAN   | 0  | K.NKHEAMITDLEER.L                  | MYH9     |

|      |   |       |       |        |                     |    |                                    |          |
|------|---|-------|-------|--------|---------------------|----|------------------------------------|----------|
| 2379 | 2 | 3.681 | 0.319 | 17/24  | P14649_MYL6B_HUMAN  | 8  | R.ALGQNPTNAEVLK.V                  | MYL6B    |
| 7049 | 2 | 3.68  | 0.489 | 19/24  | P35659_DEK_HUMAN    | 2  | K.LLASANLEEVTM*K.Q                 | DEK      |
| 7686 | 2 | 3.68  | 0.206 | 22/28  | P19784_CSK22_HUMAN  | 2  | K.TPALVFEYINNTDFK.Q                | CSNK2A2  |
| 5453 | 2 | 3.679 | 0.338 | 23/32  | P67870_CSK2B_HUMAN  | 1  | K.IHPM*AYQLQLQAASNFK.S             | CSNK2B   |
| 7979 | 2 | 3.677 | 0.511 | 21/24  | P35659_DEK_HUMAN    | 2  | K.LLASANLEEVTM*K.Q                 | DEK      |
| 7176 | 2 | 3.675 | 0.321 | 16/24  | P35659_DEK_HUMAN    | 3  | K.LLYNRPGTVSSLK.K                  | DEK      |
| 6533 | 2 | 3.671 | 0.438 | 14/30  | P05388_RLA0_HUMAN   | 10 | R.GNVGFVFTKEDLTEIR.D               | RPLP0    |
| 7986 | 2 | 3.668 | 0.29  | 22/28  | P68366_TBA4A_HUMAN  | 4  | R.AVFVDLEPTVIDEIR.N                | TUBA4A   |
| 5763 | 2 | 3.667 | 0.491 | 21/24  | P35659_DEK_HUMAN    | 2  | K.LLASANLEEVTM*K.Q                 | DEK      |
| 3690 | 2 | 3.667 | 0.424 | 19/24  | P35659_DEK_HUMAN    | 2  | K.VYENYPTYDLTER.K                  | DEK      |
| 6723 | 3 | 3.666 | 0.235 | 27/72  | SAV_STRAV           | 0  | R.NAHSATTWSGQYVGGAEAR.I            |          |
| 3465 | 2 | 3.665 | 0.29  | 17/24  | P35659_DEK_HUMAN    | 3  | K.LLYNRPGTVSSLK.K                  | DEK      |
| 3238 | 3 | 3.661 | 0.421 | 24/56  | P35659_DEK_HUMAN    | 2  | K.LKKPPTDEELKETIK.K                | DEK      |
| 4356 | 3 | 3.661 | 0.35  | 23/44  | P62888_RL30_HUMAN   | 1  | R.KSEIEYYAMLAK.T                   | RPL30    |
| 874  | 3 | 3.659 | 0.447 | 28/52  | P19784_CSK22_HUMAN  | 0  | R.DVKPHNVMIHQKQK.K                 | CSNK2A2  |
| 8569 | 2 | 3.659 | 0.539 | 19/40  | P06748_NPM_HUMAN    | 1  | K.MSVQPTVSLGGFEITPPVVL.R.L         | NPM1     |
| 6040 | 3 | 3.658 | 0.388 | 25/68  | P11142_HSP7C_HUMAN  | 6  | K.TVTNAVTVPAYFNDSQR.Q              | HSPA8    |
| 7891 | 3 | 3.657 | 0.349 | 28/60  | P35579_MYH9_HUMAN   | 0  | R.LQQELDLLVDLDHQR.Q                | MYH9     |
| 9203 | 2 | 3.656 | 0.453 | 19/40  | SAV1_STRVL          | 2  | R.YDSAPATDGSALTALGWTVAWK.N         |          |
| 6778 | 2 | 3.656 | 0.408 | 19/22  | P19784_CSK22_HUMAN  | 2  | K.VLGTTELYGYLK.K                   | CSNK2A2  |
| 9179 | 2 | 3.652 | 0.502 | 17/24  | P35659_DEK_HUMAN    | 2  | K.LLASANLEEVTM*K.Q                 | DEK      |
| 5723 | 2 | 3.651 | 0.487 | 19/22  | P68400_CSK21_HUMAN  | 3  | K.QLYQTLTDYDIR.F                   | CSNK2A1  |
| 6587 | 2 | 3.647 | 0.548 | 22/24  | P35659_DEK_HUMAN    | 2  | K.LLASANLEEVTM.K.Q                 | DEK      |
| 5465 | 3 | 3.645 | 0.341 | 28/56  | P68400_CSK21_HUMAN  | 3  | R.TPALVFEHVNNTDFK.Q                | CSNK2A1  |
| 5547 | 3 | 3.645 | 0.228 | 26/64  | P07355_ANXA2_HUMAN  | 11 | K.TDLEKDISDTSDFR.K                 | ANXA2    |
| 2681 | 2 | 3.643 | 0.148 | 17/26  | P35659_DEK_HUMAN    | 3  | K.LLYNRPGTVSSLK.K.N                | DEK      |
| 6360 | 2 | 3.642 | 0.189 | 16/30  | P62888_RL30_HUMAN   | 3  | R.VCTLAIDPGDSDIIR.S                | RPL30    |
| 8101 | 3 | 3.638 | 0.428 | 27/72  | P68400_CSK21_HUMAN  | 3  | R.LIDWGLAEFYHPGQEYNVR.V            | CSNK2A1  |
| 2667 | 2 | 3.638 | 0.282 | 18/22  | P62269_RS18_HUMAN   | 1  | K.YSQVLANGLDNK.L                   | RPS18    |
| 6631 | 3 | 3.634 | 0.341 | 25/52  | P35579_MYH9_HUMAN   | 0  | K.VSHLLGINVTDFT.R.G                | MYH9     |
| 4998 | 2 | 3.632 | 0.479 | 17/20  | D6RDA2_D6RDA2_HUMAN | 0  | R.ILNFLM*HPKPS.-                   | DEK      |
| 3197 | 2 | 3.631 | 0.463 | 15/22  | P18124_RL7_HUMAN    | 3  | R.KAGNFYVPAEPK.L                   | RPL7     |
| 9140 | 2 | 3.63  | 0.35  | 21/24  | P35659_DEK_HUMAN    | 2  | K.LLASANLEEVTM.K.Q                 | DEK      |
| 1517 | 2 | 3.629 | 0.348 | 16/22  | P15927_RFA2_HUMAN   | 1  | K.IDDM*TAAPM*DVR.Q                 | RFA2     |
| 2214 | 3 | 3.628 | 0.344 | 27/48  | P35579_MYH9_HUMAN   | 0  | K.NKHEAM*ITDLEER.L                 | MYH9     |
| 5370 | 3 | 3.627 | 0.373 | 27/56  | P68400_CSK21_HUMAN  | 3  | R.TPALVFEHVNNTDFK.Q                | CSNK2A1  |
| 6412 | 2 | 3.627 | 0.443 | 19/26  | Q9NY61_AATF_HUMAN   | 0  | K.TPGFSVQSISDFEK.F                 | AATF     |
| 2492 | 2 | 3.626 | 0.396 | 15/24  | P35659_DEK_HUMAN    | 3  | K.LLYNRPGTVSSLK.K                  | DEK      |
| 7588 | 2 | 3.625 | 0.258 | 20/28  | P68400_CSK21_HUMAN  | 5  | K.YSEVFEAINITNNEK.V                | CSNK2A1  |
| 6276 | 3 | 3.624 | 0.397 | 21/40  | P35580_MYH10_HUMAN  | 1  | K.LDPHLVLDQLR.C                    | MYH10    |
| 3163 | 2 | 3.624 | 0.433 | 20/28  | P35659_DEK_HUMAN    | 2  | K.LKKPPTDEELKETIK.K                | DEK      |
| 5815 | 3 | 3.623 | 0.315 | 23/44  | P11021_GRP78_HUMAN  | 0  | R.AKFEELNM*DLFR.S                  | HSPA5    |
| 5075 | 3 | 3.622 | 0.242 | 19/60  | P62736_ACTA_HUMAN   | 7  | K.YPIEHGIIINWDDMEK.I               | ACTA2    |
| 5923 | 3 | 3.62  | 0.27  | 25/84  | P68400_CSK21_HUMAN  | 5  | R.EYWDYESHVVEWGNQDDYQLVR.K         | CSNK2A1  |
| 2584 | 2 | 3.62  | 0.17  | 18/26  | P35659_DEK_HUMAN    | 3  | K.LLYNRPGTVSSLK.K.N                | DEK      |
| 9023 | 2 | 3.616 | 0.46  | 20/24  | Q07021_C1QBP_HUMAN  | 2  | R.EVSFQSTGESEWK.D                  | C1QBP    |
| 5087 | 3 | 3.616 | 0.082 | 25/48  | P35659_DEK_HUMAN    | 2  | K.LLASANLEEVTM*K.Q                 | DEK      |
| 4940 | 2 | 3.614 | 0.493 | 22/26  | P35579_MYH9_HUMAN   | 0  | R.IM*GIPEEEQM*GLLR.V               | MYH9     |
| 8844 | 2 | 3.613 | 0.457 | 20/40  | SAV1_STRVL          | 2  | R.YDSAPATDGSALTALGWTVAWK.N         |          |
| 3418 | 2 | 3.612 | 0.215 | 17/18  | P62805_H4_HUMAN     | 0  | R.ISGLIYEETR.G                     | HIST1H4A |
| 4694 | 2 | 3.611 | 0.389 | 23/36  | P62841_RS15_HUMAN   | 7  | R.DM*IILPEM*VGS*MGVYNGK.T          | RPS15    |
| 6374 | 2 | 3.61  | 0.509 | 18/22  | P35659_DEK_HUMAN    | 3  | K.NVGQFSGFPFEK.G                   | DEK      |
| 6614 | 3 | 3.61  | 0.306 | 18/44  | P35659_DEK_HUMAN    | 3  | K.NVGQFSGFPFEK.G                   | DEK      |
| 3095 | 3 | 3.609 | 0.404 | 37/112 | P35659_DEK_HUMAN    | 1  | -.MSASAPAAEGEGTPTQPASEKEPEMPGPR.E  | DEK      |
| 8710 | 3 | 3.609 | 0.309 | 34/84  | P12956_XRCC6_HUMAN  | 1  | R.NLEALALDLM*EPEQAVDLTLPK.V        | XRCC6    |
| 7264 | 2 | 3.609 | 0.483 | 21/24  | P35659_DEK_HUMAN    | 2  | K.LLASANLEEVTM.K.Q                 | DEK      |
| 5191 | 3 | 3.609 | 0.391 | 23/64  | P35659_DEK_HUMAN    | 2  | R.ILNFLM*HPKPSGKPLPK.S             | DEK      |
| 4200 | 2 | 3.608 | 0.379 | 17/18  | P35659_DEK_HUMAN    | 1  | R.LTMQVSSLQR.E                     | DEK      |
| 3310 | 3 | 3.605 | 0.179 | 28/48  | P35579_MYH9_HUMAN   | 0  | R.KKVEAQLQELQVK.F                  | MYH9     |
| 1605 | 2 | 3.603 | 0.374 | 15/18  | P35579_MYH9_HUMAN   | 0  | R.ALEQQVEEM*K.T                    | MYH9     |
| 5545 | 2 | 3.595 | 0.437 | 20/24  | P39019_RS19_HUMAN   | 4  | K.ELAPYDENWFYTR.A                  | RPS19    |
| 6094 | 2 | 3.593 | 0.359 | 19/24  | Q9NW13_RBM28_HUMAN  | 0  | R.LINNNPEIFGPLK.R                  | RBM28    |
| 4967 | 2 | 3.592 | 0.5   | 17/24  | P35659_DEK_HUMAN    | 2  | K.LLASANLEEVTM*K.Q                 | DEK      |
| 3062 | 2 | 3.585 | 0.421 | 19/28  | P35659_DEK_HUMAN    | 2  | K.LKKPPTDEELKETIK.K                | DEK      |
| 4679 | 2 | 3.581 | 0.444 | 15/24  | P68400_CSK21_HUMAN  | 4  | R.EAM*EHPYFYTVVK.D                 | CSNK2A1  |
| 5640 | 2 | 3.578 | 0.374 | 21/28  | P68400_CSK21_HUMAN  | 3  | R.TPALVFEHVNNTDFK.Q                | CSNK2A1  |
| 3543 | 3 | 3.576 | 0.508 | 26/112 | P35659_DEK_HUMAN    | 1  | -.MSASAPAAEGEGTPTQPASEKEPEM*PGPR.E | DEK      |
| 5933 | 2 | 3.576 | 0.302 | 20/22  | P11142_HSP7C_HUMAN  | 7  | K.DAGTIAGLNVLR.I                   | HSPA8    |
| 2480 | 3 | 3.575 | 0.281 | 25/72  | SAV_STRAV           | 0  | R.NAHSATTWSGQYVGGAEAR.I            |          |
| 2390 | 2 | 3.575 | 0.261 | 20/28  | P68400_CSK21_HUMAN  | 3  | R.DVKPHNVMIHDEHRK.L                | CSNK2A1  |
| 4828 | 3 | 3.575 | 0.269 | 20/44  | Q15208_STK38_HUMAN  | 0  | R.DIKPDNLLDLSK.G                   | STK38    |
| 3973 | 2 | 3.571 | 0.417 | 18/24  | P26373_RL13_HUMAN   | 0  | K.LATQLTGPVM*PVR.N                 | RPL13    |
| 7820 | 3 | 3.568 | 0.275 | 30/100 | P35579_MYH9_HUMAN   | 2  | K.SGFEPASLKEEVGEEAIVLVENCK.V       | MYH9     |
| 969  | 2 | 3.567 | 0.42  | 17/20  | P62736_ACTA_HUMAN   | 21 | K.DSYVGDEAQSK.R                    | ACTA2    |
| 3087 | 3 | 3.562 | 0.332 | 29/68  | P62829_RL23_HUMAN   | 3  | R.LNRLPAAGVGD*VM*ATVK.K            | RPL23    |

|      |   |       |       |        |                             |    |                                            |           |
|------|---|-------|-------|--------|-----------------------------|----|--------------------------------------------|-----------|
| 1048 | 3 | 3.562 | 0.284 | 24/40  | P27694_RFA1_HUMAN           | 1  | R.VKVETYNDESR.I                            | RPA1      |
| 2874 | 2 | 3.56  | 0.354 | 14/16  | P19784_CSK22_HUMAN          | 1  | R.VYAEVNSLR.S                              | CSNK2A2   |
| 5237 | 3 | 3.551 | 0.06  | 25/52  | P35659_DEK_HUMAN            | 2  | K.KLLASANLEEVTMK.Q                         | DEK       |
| 6741 | 3 | 3.55  | 0.429 | 23/68  | P68400_CSK21_HUMAN          | 3  | R.GGPNITLADIVKDPVSR.T                      | CSNK2A1   |
| 6647 | 2 | 3.548 | 0.622 | 19/22  | P35659_DEK_HUMAN            | 3  | K.NVGFSGFPFEK.G                            | DEK       |
| 8111 | 2 | 3.546 | 0.515 | 22/38  | P12956_XRCC6_HUMAN          | 1  | R.NIPPYFVALVPQEEELDDQK.I                   | XRCC6     |
| 6041 | 2 | 3.539 | 0.193 | 20/28  | P33778_H2B1B_HUMAN          | 14 | K.AM*GIM*NSFVNDIFER.I                      | HIST1H2BB |
| 2327 | 2 | 3.538 | 0.393 | 17/20  | P24844_MYL9_HUMAN           | 0  | R.FTDEEVDEM*YR.E                           | MYL9      |
| 4378 | 2 | 3.532 | 0.373 | 19/22  | P62888_RL30_HUMAN           | 1  | R.KSEIEYYAMLAK.T                           | RPL30     |
| 7486 | 3 | 3.531 | 0.308 | 29/92  | Q01804_OTUD4_HUMAN          | 0  | R.QNIVLPSEKGEGLDLSLENLDLSK.D               | OTUD4     |
| 1344 | 3 | 3.53  | 0.446 | 32/112 | P35659_DEK_HUMAN            | 1  | -.M*SASAPAAEGEGTPTQPASEKEPEM*PGPR.E        | DEK       |
| 3322 | 2 | 3.53  | 0.444 | 17/18  | P62805_H4_HUMAN             | 0  | R.ISGLIYEETR.G                             | HIST1H4A  |
| 5966 | 3 | 3.529 | 0.096 | 23/60  | P35579_MYH9_HUMAN           | 0  | K.HSQAVEELAEQLEQTK.R                       | MYH9      |
| 5733 | 2 | 3.528 | 0.226 | 14/28  | AOA088AWL3_AOA088AWL3_HUMAN | 0  | R.GSPMMNRTSDVSSNK.S                        | NCOR1     |
| 7142 | 3 | 3.526 | 0.229 | 30/72  | SAV_STRAV                   | 0  | R.NAHSATTWSGQYVGGAEAR.I                    |           |
| 9018 | 2 | 3.518 | 0.299 | 17/18  | P35659_DEK_HUMAN            | 1  | R.LTMQVSSLQR.E                             | DEK       |
| 5379 | 3 | 3.516 | 0.104 | 27/80  | P60709_ACTB_HUMAN           | 1  | K.DLYANTVLSGGTTMYPGIADR.M                  | ACTB      |
| 5014 | 2 | 3.516 | 0.528 | 19/22  | P05387_RLA2_HUMAN           | 1  | K.NIEDVIAQGGIG.K                           | RPLP2     |
| 6735 | 2 | 3.512 | 0.329 | 18/30  | Q15233_NONO_HUMAN           | 3  | R.LFVGNLPPDITEEEMR.K                       | NONO      |
| 4424 | 3 | 3.508 | 0.145 | 28/52  | P35659_DEK_HUMAN            | 2  | K.KLLASANLEEVTM*K.Q                        | DEK       |
| 5144 | 2 | 3.507 | 0.382 | 16/18  | P35579_MYH9_HUMAN           | 0  | K.TDLLLEPYNK.Y                             | MYH9      |
| 5290 | 2 | 3.502 | 0.317 | 18/24  | P68400_CSK21_HUMAN          | 4  | R.EAMEHPYFYTVVK.D                          | CSNK2A1   |
| 6877 | 2 | 3.496 | 0.424 | 19/36  | P04908_H2A1B_HUMAN          | 10 | R.VTIAQGGVLPNIAQVLLPK.K                    | HIST1H2AB |
| 4265 | 3 | 3.495 | 0.356 | 25/56  | P68400_CSK21_HUMAN          | 3  | R.TPALVFEHVNNTDFK.Q                        | CSNK2A1   |
| 3513 | 3 | 3.494 | 0.393 | 21/44  | Q9UGN5_PARP2_HUMAN          | 1  | K.SPLKPESQLDLR.V                           | PARP2     |
| 7984 | 3 | 3.494 | 0.225 | 30/76  | Q8WXX5_DNJ9_HUMAN           | 0  | R.NIIQQAIDAGEVPSYNAFVK.E                   | DNAJC9    |
| 4020 | 3 | 3.49  | 0.329 | 21/68  | P62736_ACTA_HUMAN           | 7  | R.VPAEEHTLLTEAPLNPK.A                      | ACTA2     |
| 6841 | 2 | 3.489 | 0.462 | 18/24  | P04083_ANXA1_HUMAN          | 2  | K.GVDEATIIDLTK.R                           | ANXA1     |
| 6106 | 2 | 3.487 | 0.318 | 16/18  | Q8NHW5_RLAOL_HUMAN          | 8  | K.IIQLLDDYPK.C                             | RPLP06    |
| 5107 | 2 | 3.486 | 0.233 | 16/18  | P35579_MYH9_HUMAN           | 0  | R.RGDLPFVVR.R                              | MYH9      |
| 8996 | 3 | 3.486 | 0.305 | 25/56  | P68400_CSK21_HUMAN          | 3  | R.TPALVFEHVNNTDFK.Q                        | CSNK2A1   |
| 4618 | 3 | 3.485 | 0.403 | 27/48  | P35659_DEK_HUMAN            | 2  | K.VYENYPTDLTER.K                           | DEK       |
| 1850 | 2 | 3.484 | 0.086 | 15/18  | P19105_ML12A_HUMAN          | 4  | K.EAFNM*IDQNR.D                            | MYL12A    |
| 5402 | 3 | 3.484 | 0.343 | 29/60  | P68400_CSK21_HUMAN          | 2  | R.KEPFFHGHNDYDQLVR.I                       | CSNK2A1   |
| 2774 | 2 | 3.483 | 0.188 | 19/26  | P35659_DEK_HUMAN            | 3  | K.LLYNRPGTVSSLKK.N                         | DEK       |
| 1616 | 2 | 3.481 | 0.556 | 19/26  | P05186_PPBT_HUMAN           | 0  | K.ANEGTVGVSAATER.S                         | ALPL      |
| 8316 | 2 | 3.477 | 0.311 | 18/28  | P19784_CSK22_HUMAN          | 2  | K.TPALVFEYINNTDFK.Q                        | CSNK2A2   |
| 4891 | 3 | 3.473 | 0.144 | 23/52  | P35659_DEK_HUMAN            | 2  | K.KLLASANLEEVTM*K.Q                        | DEK       |
| 9132 | 3 | 3.473 | 0.358 | 27/72  | SAV_STRAV                   | 0  | R.NAHSATTWSGQYVGGAEAR.I                    |           |
| 3718 | 3 | 3.472 | 0.383 | 28/76  | P35579_MYH9_HUMAN           | 0  | K.RQAQQRDELADEIANSSG.K                     | MYH9      |
| 8614 | 3 | 3.472 | 0.255 | 31/84  | P12956_XRCC6_HUMAN          | 1  | R.LGSLVDFEKLVYPPDYNPEGK.V                  | XRCC6     |
| 8140 | 2 | 3.47  | 0.423 | 13/32  | P05388_RLA0_HUMAN           | 4  | R.VLALSVETDYTFPLAEK.V                      | RPLP0     |
| 5578 | 3 | 3.469 | 0.324 | 25/52  | P67870_CSK2B_HUMAN          | 4  | K.FNLTGLNEQVPHYR.Q                         | CSNK2B    |
| 7930 | 3 | 3.469 | 0.373 | 30/72  | SAV_STRAV                   | 0  | R.NAHSATTWSGQYVGGAEAR.I                    |           |
| 5225 | 3 | 3.465 | 0.151 | 20/52  | P11021_GRP78_HUMAN          | 0  | K.KKELEIIVQPIISK.L                         | HSPA5     |
| 6086 | 3 | 3.464 | 0.151 | 25/76  | P07477_TRY1_HUMAN           | 10 | R.LGEHNIEVLEGNQFINAAK.I                    | PRSS1     |
| 3712 | 3 | 3.462 | 0.46  | 30/72  | SAV_STRAV                   | 0  | R.NAHSATTWSGQYVGGAEAR.I                    |           |
| 4799 | 2 | 3.462 | 0.383 | 17/24  | P19784_CSK22_HUMAN          | 2  | K.EAM*EHYFYFVVK.E                          | CSNK2A2   |
| 6195 | 2 | 3.46  | 0.3   | 16/18  | Q8NHW5_RLAOL_HUMAN          | 8  | K.IIQLLDDYPK.C                             | RPLP06    |
| 2971 | 3 | 3.46  | 0.447 | 34/132 | P05387_RLA2_HUMAN           | 1  | K.LASVPAGGAVAVSAAPGSAAPAAGSAPAAAE<br>EKK.D | RPLP2     |
| 7156 | 2 | 3.46  | 0.3   | 17/20  | P52272_HNRPM_HUMAN          | 6  | R.AFITNIPFDVK.W                            | HNRNPM    |
| 1890 | 2 | 3.459 | 0.449 | 18/20  | P62917_RL8_HUMAN            | 3  | R.AVVGVVAGGGR.I                            | RPL8      |
| 3954 | 3 | 3.458 | 0.37  | 25/72  | SAV_STRAV                   | 0  | R.NAHSATTWSGQYVGGAEAR.I                    |           |
| 2998 | 2 | 3.458 | 0.351 | 17/18  | P35659_DEK_HUMAN            | 1  | R.LTMQVSSLQR.E                             | DEK       |
| 5610 | 3 | 3.457 | 0.291 | 25/56  | P68400_CSK21_HUMAN          | 3  | R.TPALVFEHVNNTDFK.Q                        | CSNK2A1   |
| 8443 | 2 | 3.455 | 0.353 | 17/22  | P35659_DEK_HUMAN            | 3  | K.NVGFSGFPFEK.G                            | DEK       |
| 6266 | 2 | 3.455 | 0.387 | 17/24  | P68400_CSK21_HUMAN          | 3  | R.GGPNITLADIVK.D                           | CSNK2A1   |
| 5127 | 2 | 3.454 | 0.336 | 20/26  | P11021_GRP78_HUMAN          | 0  | R.ITPSYVAFTPEGER.L                         | HSPA5     |
| 6256 | 2 | 3.454 | 0.459 | 16/22  | Q8NHW5_RLAOL_HUMAN          | 6  | K.TSFFQALGITTK.I                           | RPLP06    |
| 2683 | 2 | 3.454 | 0.413 | 18/26  | P61604_CH10_HUMAN           | 2  | K.VLQATVVAVGSGSK.G                         | HSPE1     |
| 2776 | 2 | 3.452 | 0.426 | 18/20  | P19105_ML12A_HUMAN          | 4  | K.LNGTDPEDVIR.N                            | MYL12A    |
| 7801 | 3 | 3.451 | 0.335 | 21/48  | P68400_CSK21_HUMAN          | 3  | R.GGPNITLADIVK.D                           | CSNK2A1   |
| 5880 | 3 | 3.45  | 0.308 | 28/72  | SAV_STRAV                   | 0  | R.NAHSATTWSGQYVGGAEAR.I                    |           |
| 7575 | 2 | 3.449 | 0.479 | 19/28  | P07437_TBB5_HUMAN           | 2  | R.ALTVPELTQQVFDK.N                         | TUBB      |
| 4950 | 3 | 3.447 | 0.343 | 24/64  | P12956_XRCC6_HUMAN          | 1  | R.TFNTSTGGLLLPSTDTRK.S                     | XRCC6     |
| 1493 | 2 | 3.447 | 0.278 | 14/20  | Q99417_MYCBP_HUMAN          | 1  | K.LAQYEPPEEK.R                             | MYCBP     |
| 5376 | 3 | 3.441 | 0.209 | 22/76  | P07477_TRY1_HUMAN           | 10 | R.LGEHNIEVLEGNQFINAAK.I                    | PRSS1     |
| 2089 | 3 | 3.438 | 0.363 | 26/52  | P35659_DEK_HUMAN            | 2  | K.KPPTDEELKETIKK.L                         | DEK       |
| 3961 | 2 | 3.432 | 0.405 | 16/18  | P19784_CSK22_HUMAN          | 2  | R.WENFIHSENR.H                             | CSNK2A2   |
| 8888 | 3 | 3.432 | 0.348 | 27/80  | Q9NYL9_TMOD3_HUMAN          | 0  | K.QLETVLDDLDPENALLPAGFR.Q                  | TMOD3     |
| 3392 | 2 | 3.423 | 0.469 | 17/20  | P67870_CSK2B_HUMAN          | 3  | K.YQQGDFGYC*PR.V                           | CSNK2B    |
| 7547 | 3 | 3.423 | 0.34  | 27/72  | SAV_STRAV                   | 0  | R.NAHSATTWSGQYVGGAEAR.I                    |           |
| 6180 | 2 | 3.422 | 0.437 | 17/24  | P35659_DEK_HUMAN            | 2  | K.LLASANLEEVTM*K.Q                         | DEK       |
| 5705 | 2 | 3.42  | 0.203 | 24/28  | Q07021_C1QBP_HUMAN          | 2  | K.M*SGWELELNGTEAK.L                        | C1QBP     |
| 2482 | 2 | 3.419 | 0.476 | 13/28  | Q9HCY8_S10AE_HUMAN          | 0  | R.SANAEDAQEFSDVER.A                        | S100A14   |

|      |   |       |       |        |                    |    |                               |           |
|------|---|-------|-------|--------|--------------------|----|-------------------------------|-----------|
| 7246 | 2 | 3.418 | 0.162 | 13/38  | Q99551_MTEF1_HUMAN | 3  | K.NEDLLKNLLTMGVDIDMARK.R      | MTERF1    |
| 6610 | 3 | 3.418 | 0.287 | 22/56  | P68400_CSK21_HUMAN | 5  | K.YSEVFEAINITNNEK.V           | CSNK2A1   |
| 3339 | 2 | 3.416 | 0.352 | 19/28  | P52272_HNRPM_HUMAN | 4  | R.M*GPAM*GPALGAGIER.M         | HNRNPM    |
| 1540 | 2 | 3.414 | 0.408 | 18/22  | P20839_IMDH1_HUMAN | 1  | K.IAQGVSGSIQDK.G              | IMPDH1    |
| 4186 | 2 | 3.413 | 0.552 | 14/18  | P24844_MYL9_HUMAN  | 0  | K.GNFNYVEFTR.I                | MYL9      |
| 1846 | 2 | 3.411 | 0.395 | 17/22  | P39023_RL3_HUMAN   | 2  | K.NNASTDYDLSDK.S              | RPL3      |
| 6472 | 3 | 3.408 | 0.359 | 28/60  | P08107_HSP71_HUMAN | 1  | R.IINEPTAAAIAYGLDR.T          | HSPA1A    |
| 2954 | 2 | 3.405 | 0.535 | 16/18  | P60709_ACTB_HUMAN  | 4  | R.GYSFTTTAER.E                | ACTB      |
| 7544 | 2 | 3.405 | 0.483 | 21/26  | P11021_GRP78_HUMAN | 0  | K.TFAPEEISAMVLTK.M            | HSPA5     |
| 8112 | 3 | 3.404 | 0.17  | 21/88  | P67870_CSK2B_HUMAN | 2  | R.VYC#ENQPMPLPIGLSDIPGEAMVK.L | CSNK2B    |
| 1274 | 2 | 3.402 | 0.335 | 16/18  | P35659_DEK_HUMAN   | 3  | R.SGVNSSELVKR.I               | DEK       |
| 5047 | 2 | 3.4   | 0.374 | 16/18  | PODME0_SETLP_HUMAN | 3  | K.VEVTEFEDIK.S                | SETSIP    |
| 8039 | 2 | 3.4   | 0.324 | 19/36  | P27694_RFA1_HUMAN  | 1  | R.GWFDAEGQALDGVSSISDLK.S      | RPA1      |
| 6029 | 2 | 3.4   | 0.421 | 17/30  | P04792_HSPB1_HUMAN | 1  | R.VSLDVNHFAPDELTVK.T          | HSPB1     |
| 4957 | 2 | 3.399 | 0.444 | 17/18  | P35579_MYH9_HUMAN  | 0  | K.ALELDSNLYR.I                | MYH9      |
| 6246 | 2 | 3.397 | 0.303 | 17/30  | Q5TAX3_TUT4_HUMAN  | 2  | R.M*DDFQLKGVIEEKFK.V.W        | ZCCHC11   |
| 2346 | 3 | 3.397 | 0.309 | 24/48  | P35659_DEK_HUMAN   | 2  | K.KPPTDEELKETIK.K             | DEK       |
| 4298 | 2 | 3.395 | 0.199 | 17/18  | P35659_DEK_HUMAN   | 1  | R.LTMQVSSLQR.E                | DEK       |
| 4076 | 3 | 3.394 | 0.348 | 24/48  | P62805_H4_HUMAN    | 0  | R.KTVTAM*DVVYALK.R            | HIST1H4A  |
| 1644 | 2 | 3.391 | 0.383 | 16/16  | P67870_CSK2B_HUMAN | 1  | K.RPANQFVPR.L                 | CSNK2B    |
| 5980 | 3 | 3.391 | 0.407 | 24/72  | SAV_STRAV          | 0  | R.NAHSATTWSGQYVGGAEAR.I       |           |
| 7435 | 3 | 3.389 | 0.173 | 23/88  | P27694_RFA1_HUMAN  | 0  | K.SENLGQGDKPDYFSSVATVVYLR.K   | RPA1      |
| 6111 | 2 | 3.389 | 0.438 | 17/20  | Q7L2E3_DHX30_HUMAN | 1  | R.TPLENLVLQAK.I               | DHX30     |
| 4072 | 2 | 3.388 | 0.383 | 17/18  | P35659_DEK_HUMAN   | 1  | R.LTMQVSSLQR.E                | DEK       |
| 5540 | 2 | 3.388 | 0.233 | 18/26  | P35659_DEK_HUMAN   | 2  | K.KVYENPTYDLTER.K             | DEK       |
| 5106 | 2 | 3.388 | 0.25  | 17/32  | P35659_DEK_HUMAN   | 2  | R.ILNFLM*HPKPSGKPLPK.S        | DEK       |
| 7344 | 3 | 3.385 | 0.346 | 24/80  | SAV1_STRVL         | 2  | R.YDSAPATDGSGLTGWTVAWK.N      |           |
| 4141 | 2 | 3.383 | 0.423 | 18/26  | P02545_LMNA_HUMAN  | 2  | R.TALINSTGEEVAMR.K            | LMNA      |
| 899  | 2 | 3.382 | 0.348 | 13/20  | P35579_MYH9_HUMAN  | 0  | R.EM*EAELEDERK.Q              | MYH9      |
| 8619 | 2 | 3.381 | 0.272 | 16/34  | Q9NY61_AATF_HUMAN  | 0  | K.ALLTTNQLPQPDVFPFLK.D        | AATF      |
| 4306 | 2 | 3.381 | 0.361 | 17/20  | P11142_HSP7C_HUMAN | 5  | K.NSLESYAFNM*K.A              | HSPA8     |
| 4040 | 3 | 3.38  | 0.421 | 27/64  | P62906_RL10A_HUMAN | 0  | K.AGKFPSSLTHNENM*VAK.V        | RPL10A    |
| 4924 | 3 | 3.38  | 0.198 | 22/76  | P24844_MYL9_HUMAN  | 0  | R.ELLTMDGRFTDEEVDEMYR.E       | MYL9      |
| 1130 | 2 | 3.378 | 0.354 | 17/20  | Q8NHW5_RLAOL_HUMAN | 11 | R.GHLENNPALEK.L               | RPLP06    |
| 4875 | 2 | 3.375 | 0.189 | 26-Dec | Q9NUL3_STAU2_HUMAN | 12 | K.KNAEAMLLQLGYK.A             | STAU2     |
| 4045 | 2 | 3.372 | 0.514 | 17/36  | IGKC_MOUSE         | 0  | K.DSTYSM*SSTLTLTKDEYER.H      |           |
| 4082 | 3 | 3.372 | 0.349 | 26/72  | SAV_STRAV          | 0  | R.NAHSATTWSGQYVGGAEAR.I       |           |
| 4434 | 2 | 3.371 | 0.533 | 18/24  | P34931_HS71L_HUMAN | 14 | R.TTPSYVAFTDTER.L             | HSPA1L    |
| 4104 | 2 | 3.37  | 0.288 | 20/26  | P35659_DEK_HUMAN   | 2  | K.KLLASANLEEVTM*K.Q           | DEK       |
| 5747 | 2 | 3.368 | 0.21  | 18/28  | P33778_H2B1B_HUMAN | 14 | K.AM*GIM*NSFVNDIFER.I         | HIST1H2BB |
| 5170 | 3 | 3.365 | 0.324 | 26/72  | SAV_STRAV          | 0  | R.NAHSATTWSGQYVGGAEAR.I       |           |
| 2918 | 2 | 3.364 | 0.345 | 16/20  | P35749_MYH11_HUMAN | 4  | K.KEEELQAALAR.L               | MYH11     |
| 5990 | 2 | 3.364 | 0.487 | 19/30  | Q15393_SF3B3_HUMAN | 0  | K.TPVEEVPAAIAPFQGR.V          | SF3B3     |
| 3765 | 3 | 3.363 | 0.318 | 25/72  | SAV_STRAV          | 0  | R.NAHSATTWSGQYVGGAEAR.I       |           |
| 7481 | 2 | 3.362 | 0.43  | 18/26  | P38646_GRP75_HUMAN | 0  | K.LYSPSQIGAFVLM*K.M           | HSPA9     |
| 3186 | 2 | 3.361 | 0.422 | 17/22  | P18124_RL7_HUMAN   | 3  | R.KAGNFYVPAEPK.L              | RPL7      |
| 2376 | 3 | 3.356 | 0.432 | 24/60  | P34931_HS71L_HUMAN | 4  | K.ATAGDTHLGGEDFDNR.L          | HSPA1L    |
| 4726 | 2 | 3.354 | 0.485 | 16/24  | P35659_DEK_HUMAN   | 2  | K.LLASANLEEVTM*K.Q            | DEK       |
| 6188 | 2 | 3.349 | 0.206 | 17/26  | P35659_DEK_HUMAN   | 3  | K.LLYNRPVGTVSSLLK.N           | DEK       |
| 6651 | 2 | 3.349 | 0.362 | 18/20  | Q8WXX5_DNJC9_HUMAN | 0  | K.ISELDIQAPEK.T               | DNAJC9    |
| 5629 | 2 | 3.345 | 0.066 | 22/28  | P68400_CSK21_HUMAN | 3  | R.TPALVFEHVNTDFK.Q            | CSNK2A1   |
| 1679 | 2 | 3.345 | 0.341 | 16/18  | P07355_ANXA2_HUMAN | 13 | R.TNQELQEINR.V                | ANXA2     |
| 1349 | 2 | 3.344 | 0.352 | 17/20  | P35579_MYH9_HUMAN  | 0  | R.QLEEAEEEAQR.A               | MYH9      |
| 947  | 2 | 3.344 | 0.328 | 19/22  | P12268_IMDH2_HUMAN | 1  | K.VAQGVSGAVQDK.G              | IMPDH2    |
| 4558 | 3 | 3.336 | 0.284 | 20/44  | P18124_RL7_HUMAN   | 1  | K.RIALTDNALIAR.S              | RPL7      |
| 6870 | 2 | 3.336 | 0.374 | 19/28  | P35579_MYH9_HUMAN  | 2  | K.NFINNPLAQADWAAK.K           | MYH9      |
| 9341 | 3 | 3.335 | 0.168 | 22/64  | P68400_CSK21_HUMAN | 5  | R.GKYSEVFEAINITNNEK.V         | CSNK2A1   |
| 5293 | 2 | 3.334 | 0.233 | 14/34  | Q13332_PTPRS_HUMAN | 2  | R.EDQLPSGFNPIDM*GPQLK.V       | PTPRS     |
| 6485 | 3 | 3.333 | 0.259 | 24/56  | P68400_CSK21_HUMAN | 5  | K.YSEVFEAINITNNEK.V           | CSNK2A1   |
| 8185 | 3 | 3.332 | 0.393 | 25/72  | P49411_EFTU_HUMAN  | 0  | R.DLEKPFLLPVEAVVSVPGR.G       | TUFM      |
| 1629 | 2 | 3.328 | 0.231 | 15/16  | P67870_CSK2B_HUMAN | 1  | K.RPANQFVPR.L                 | CSNK2B    |
| 5251 | 3 | 3.327 | 0.338 | 24/60  | P19784_CSK22_HUMAN | 2  | R.REPFFHGGQDNYDQLVR.I         | CSNK2A2   |
| 3959 | 2 | 3.324 | 0.359 | 16/18  | P19784_CSK22_HUMAN | 2  | R.WENFIHSENR.H                | CSNK2A2   |
| 6308 | 2 | 3.321 | 0.347 | 17/18  | Q9H4B7_TBB1_HUMAN  | 16 | K.LAVNMVFPFR.L                | TUBB1     |
| 2388 | 2 | 3.319 | 0.205 | 15/22  | Q16526_CRY1_HUMAN  | 0  | K.LSIEYDSEPFGEK.E             | CRY1      |
| 4893 | 2 | 3.317 | 0.32  | 16/24  | P19784_CSK22_HUMAN | 2  | K.EAM*EHYPFYFVVK.E            | CSNK2A2   |
| 5950 | 3 | 3.317 | 0.262 | 26/64  | P67870_CSK2B_HUMAN | 1  | K.IHPM*AYQLQLQAASNFK.S        | CSNK2B    |
| 1898 | 2 | 3.315 | 0.266 | 15/18  | P35659_DEK_HUMAN   | 1  | R.LTM*QVSSLQR.E               | DEK       |
| 1632 | 2 | 3.315 | 0.511 | 16/20  | P62736_ACTA_HUMAN  | 22 | R.HQGMVMVGMGQK.D              | ACTA2     |
| 7747 | 3 | 3.312 | 0.111 | 20/44  | P18124_RL7_HUMAN   | 1  | R.FKEANNFLWPFK.L              | RPL7      |
| 7325 | 3 | 3.31  | 0.435 | 26/100 | Q07021_C1QBP_HUMAN | 2  | K.VEEQEPELTSTPNFVVEVIKNDGKK.A | C1QBP     |
| 5098 | 3 | 3.309 | 0.342 | 25/64  | P35659_DEK_HUMAN   | 2  | R.ILNFLM*HPKPSGKPLPK.S        | DEK       |
| 6927 | 2 | 3.309 | 0.429 | 19/24  | P35659_DEK_HUMAN   | 2  | K.LLASANLEEVTM*K.Q            | DEK       |
| 3571 | 2 | 3.308 | 0.35  | 17/22  | Q9NW13_RBM28_HUMAN | 0  | K.AVEVQVELPDGK.K              | RBM28     |
| 1971 | 2 | 3.308 | 0.442 | 18/28  | P35579_MYH9_HUMAN  | 0  | R.EQLEEEEAHKNLEK.Q            | MYH9      |
| 5758 | 3 | 3.301 | 0.27  | 20/48  | P35659_DEK_HUMAN   | 3  | K.KNVGQFSGFFPEK.G             | DEK       |
| 5028 | 3 | 3.3   | 0.222 | 22/60  | P62736_ACTA_HUMAN  | 7  | K.YPIEHGHIITNWDDM*EK.I        | ACTA2     |
| 4632 | 3 | 3.296 | 0.305 | 21/48  | P35579_MYH9_HUMAN  | 0  | R.QRYEILTPNSIPK.G             | MYH9      |
| 6585 | 2 | 3.295 | 0.284 | 23/30  | P62736_ACTA_HUMAN  | 9  | K.SYELPDGQVITIGNER.F          | ACTA2     |

|      |   |       |       |        |                    |    |                                    |           |
|------|---|-------|-------|--------|--------------------|----|------------------------------------|-----------|
| 1248 | 2 | 3.291 | 0.457 | 18/28  | P47914_RL29_HUMAN  | 0  | K.AQAAAPASVPAQAPK.R                | RPL29     |
| 3305 | 3 | 3.288 | 0.397 | 20/64  | P05387_RLA2_HUMAN  | 0  | K.KILDSVGEADDDRLNK.V               | RPLP2     |
| 6832 | 2 | 3.286 | 0.39  | 20/26  | P62424_RL7A_HUMAN  | 1  | K.VPPAINQFTQALDR.Q                 | RPL7A     |
| 4170 | 2 | 3.286 | 0.322 | 17/20  | P62888_RL30_HUMAN  | 1  | K.SEIEYYAM*LAK.T                   | RPL30     |
| 1332 | 2 | 3.28  | 0.473 | 16/18  | P35579_MYH9_HUMAN  | 0  | K.THEAQIQEMR.Q                     | MYH9      |
| 1490 | 2 | 3.28  | 0.374 | 14/20  | P62750_RL23A_HUMAN | 5  | K.VNTLIRPDGEK.K                    | RPL23A    |
| 5128 | 3 | 3.277 | 0.252 | 22/60  | P62736_ACTA_HUMAN  | 7  | K.YPIEHGIITNWDDM*EK.I              | ACTA2     |
| 2211 | 3 | 3.275 | 0.21  | 24/52  | P05186_PPBT_HUMAN  | 1  | R.HETHGGEDVAVFSK.G                 | ALPL      |
| 2396 | 2 | 3.275 | 0.377 | 15/22  | P62277_RS13_HUMAN  | 2  | K.LTSDDVKEQIYK.L                   | RPS13     |
| 3436 | 2 | 3.273 | 0.25  | 19/26  | P46087_NOP2_HUMAN  | 1  | K.GADSELSTVPSVTK.T                 | NOP2      |
| 4863 | 2 | 3.272 | 0.341 | 17/24  | P35659_DEK_HUMAN   | 2  | K.VYENYPTYDLTER.K                  | DEK       |
| 4697 | 2 | 3.271 | 0.327 | 14/16  | Q96QV6_H2A1A_HUMAN | 15 | R.AGLQFPVGR.I                      | HIST1H2AA |
| 7858 | 2 | 3.271 | 0.223 | 14/36  | P78332_RBM6_HUMAN  | 1  | R.QFPNKEVLIKHQQLSDLHK.Q            | RBM6      |
| 7791 | 2 | 3.269 | 0.453 | 16/22  | P35659_DEK_HUMAN   | 3  | K.NVGQFSGFPFEK.G                   | DEK       |
| 7277 | 2 | 3.268 | 0.443 | 16/24  | P35659_DEK_HUMAN   | 2  | K.LLASANLEEVTM*K.Q                 | DEK       |
| 2058 | 3 | 3.268 | 0.207 | 32/112 | P35659_DEK_HUMAN   | 1  | -.MSASAPAAEGEGTPTQPASEKEPEM*PGPR.E | DEK       |
| 690  | 2 | 3.267 | 0.47  | 18/22  | Q9NW13_RBM28_HUMAN | 0  | K.AAEGVSAADM*AK.R                  | RBM28     |
| 4674 | 2 | 3.265 | 0.32  | 16/18  | P35659_DEK_HUMAN   | 1  | R.LTMQVSSLQR.E                     | DEK       |
| 5812 | 3 | 3.263 | 0.227 | 28/64  | P67870_CSK2B_HUMAN | 1  | K.IHPM*AYQLQLQAASNFK.S             | CSNK2B    |
| 6994 | 2 | 3.258 | 0.434 | 17/22  | P35659_DEK_HUMAN   | 3  | K.NVGQFSGFPFEK.G                   | DEK       |
| 7541 | 3 | 3.257 | 0.289 | 23/52  | PODME0_SETLP_HUMAN | 3  | R.IDFYFDENPYFENK.V                 | SETSIP    |
| 3940 | 2 | 3.256 | 0.499 | 17/20  | P04908_H2A1B_HUMAN | 2  | R.NDEELNKLGR.V                     | HIST1H2AB |
| 4420 | 2 | 3.255 | 0.279 | 23/26  | P35659_DEK_HUMAN   | 2  | K.KLLASANLEEVTM*K.Q                | DEK       |
| 1897 | 3 | 3.253 | 0.354 | 24/52  | P35659_DEK_HUMAN   | 2  | K.KPPTDEELKETIK.L                  | DEK       |
| 8208 | 2 | 3.251 | 0.391 | 14/38  | P68400_CSK21_HUMAN | 4  | R.FVHSENQHLVSPEALDFDK.L            | CSNK2A1   |
| 4090 | 3 | 3.251 | 0.105 | 27/52  | P35659_DEK_HUMAN   | 2  | K.KVYENYPTYDLTER.K                 | DEK       |
| 5972 | 2 | 3.249 | 0.486 | 14/18  | IGH1M_MOUSE        | 0  | K.DVLTITLTPK.V                     | Ighg1     |
| 5062 | 3 | 3.248 | 0.126 | 23/76  | P07477_TRY1_HUMAN  | 10 | R.LGEHNIEVLEGNEQFINAAK.I           | PRSS1     |
| 2250 | 3 | 3.247 | 0.427 | 26/48  | P35659_DEK_HUMAN   | 2  | K.KPPTDEELKETIK.K                  | DEK       |
| 3655 | 3 | 3.243 | 0.281 | 28/72  | SAV_STRAV          | 0  | R.NAHSATTWSGQYVGGAEAR.I            |           |
| 4034 | 3 | 3.242 | 0.309 | 20/52  | P62805_H4_HUMAN    | 0  | R.KTVTAM*DVVYALKR.Q                | HIST1H4A  |
| 3194 | 3 | 3.242 | 0.385 | 28/52  | Q96QV6_H2A1A_HUMAN | 12 | R.HLQLAIRNDEELNK.L                 | HIST1H2AA |
| 441  | 2 | 3.24  | 0.19  | 16/22  | P35579_MYH9_HUMAN  | 0  | R.DLQGRDEQSEEK.K                   | MYH9      |
| 6745 | 3 | 3.24  | 0.389 | 25/60  | P60660_MYL6_HUMAN  | 9  | K.VLDFEHFLPM*LQTVAK.N              | MYL6      |
| 3411 | 2 | 3.234 | 0.127 | 17/18  | P62805_H4_HUMAN    | 0  | R.ISGLIYEETR.G                     | HIST1H4A  |
| 5840 | 2 | 3.233 | 0.5   | 17/32  | P05386_RLA1_HUMAN  | 2  | K.KEESEESDDDMGFGLFD.-              | RPLP1     |
| 6133 | 2 | 3.231 | 0.284 | 15/16  | P46087_NOP2_HUMAN  | 3  | R.IQDIVGILR.D                      | NOP2      |
| 8105 | 2 | 3.231 | 0.426 | 16/22  | P35659_DEK_HUMAN   | 3  | K.NVGQFSGFPFEK.G                   | DEK       |
| 5988 | 3 | 3.229 | 0.21  | 23/64  | P68400_CSK21_HUMAN | 5  | R.GKYSEVFEAINITNNEK.V              | CSNK2A1   |
| 7773 | 3 | 3.229 | 0.365 | 27/72  | P68400_CSK21_HUMAN | 3  | R.LIDWGLAEFYHPQEQYNVR.V            | CSNK2A1   |
| 5203 | 2 | 3.228 | 0.49  | 17/22  | P35659_DEK_HUMAN   | 3  | K.NVGQFSGFPFEK.G                   | DEK       |
| 7854 | 3 | 3.226 | 0.182 | 25/84  | P68400_CSK21_HUMAN | 5  | R.EYWDYESHVVEWGNQDDYQLVR.K         | CSNK2A1   |
| 8604 | 3 | 3.225 | 0.273 | 23/108 | P06748_NPM_HUMAN   | 0  | R.TVSLGAGAKDELHIVEAEAMNYEGSPIK.V   | NPM1      |
| 1955 | 3 | 3.225 | 0.326 | 32/112 | P35659_DEK_HUMAN   | 1  | -.MSASAPAAEGEGTPTQPASEKEPEM*PGPR.E | DEK       |
| 2302 | 2 | 3.222 | 0.197 | 13/18  | Q06330_SUH_HUMAN   | 6  | K.TLYISDSDKR.K                     | RBPJ      |
| 5083 | 2 | 3.222 | 0.321 | 18/22  | Q92522_H1X_HUMAN   | 0  | K.ALQNDTLQVK.G                     | H1FX      |
| 3901 | 3 | 3.222 | 0.157 | 25/72  | SAV_STRAV          | 0  | R.NAHSATTWSGQYVGGAEAR.I            |           |
| 1721 | 2 | 3.222 | 0.324 | 16/16  | P67870_CSK2B_HUMAN | 1  | K.RPANQFVPR.L                      | CSNK2B    |
| 7944 | 3 | 3.221 | 0.286 | 23/72  | P19784_CSK22_HUMAN | 1  | R.LIDWGLAEFYHPAQEQYNVR.V           | CSNK2A2   |
| 8815 | 3 | 3.219 | 0.248 | 27/72  | SAV_STRAV          | 0  | R.NAHSATTWSGQYVGGAEAR.I            |           |
| 1958 | 2 | 3.219 | 0.373 | 15/16  | P62899_RL31_HUMAN  | 5  | R.SAINEVTR.E                       | RPL31     |
| 4023 | 3 | 3.219 | 0.414 | 22/52  | P62805_H4_HUMAN    | 0  | R.KTVTAM*DVVYALKR.Q                | HIST1H4A  |
| 4411 | 2 | 3.218 | 0.212 | 16/18  | P35659_DEK_HUMAN   | 1  | R.LTMQVSSLQR.E                     | DEK       |
| 3567 | 2 | 3.207 | 0.112 | 17/18  | P35659_DEK_HUMAN   | 1  | R.LTMQVSSLQR.E                     | DEK       |
| 7243 | 3 | 3.207 | 0.365 | 27/72  | SAV_STRAV          | 0  | R.NAHSATTWSGQYVGGAEAR.I            |           |
| 3594 | 3 | 3.207 | 0.077 | 23/48  | P62913_RL11_HUMAN  | 2  | K.LC#LNICVGGESGDR.L                | RPL11     |
| 4323 | 3 | 3.206 | 0.284 | 22/72  | SAV_STRAV          | 0  | R.NAHSATTWSGQYVGGAEAR.I            |           |
| 1738 | 2 | 3.204 | 0.243 | 15/20  | P35579_MYH9_HUMAN  | 0  | R.ASREEILAQAK.E                    | MYH9      |
| 782  | 2 | 3.202 | 0.17  | 14/16  | P38646_GRP75_HUMAN | 2  | K.VLENAEGAR.T                      | HSPA9     |
| 3864 | 2 | 3.199 | 0.32  | 16/18  | P19784_CSK22_HUMAN | 2  | R.WENFIHSENR.H                     | CSNK2A2   |
| 7016 | 2 | 3.198 | 0.319 | 18/22  | P11021_GRP78_HUMAN | 0  | R.AKFEELNMDLFR.S                   | HSPA5     |
| 5876 | 2 | 3.194 | 0.262 | 30-Nov | P35579_MYH9_HUMAN  | 0  | K.ANLQIDQINTDLNLER.S               | MYH9      |
| 2761 | 2 | 3.194 | 0.331 | 15/16  | P35579_MYH9_HUMAN  | 0  | K.ASITALEAK.I                      | MYH9      |
| 1591 | 2 | 3.193 | 0.251 | 15/16  | P35659_DEK_HUMAN   | 3  | R.SGVNSELV.K                       | DEK       |
| 2877 | 2 | 3.192 | 0.148 | 18/26  | P35659_DEK_HUMAN   | 3  | K.LLYNRPQTVSSLLK.N                 | DEK       |
| 4112 | 2 | 3.191 | 0.416 | 19/24  | E9PRG8_CK098_HUMAN | 2  | R.VVGAVIDQGLTR.H                   | C11orf98  |
| 3986 | 2 | 3.188 | 0.349 | 19/26  | Q7L2E3_DHX30_HUMAN | 1  | R.GSSFEMTDDDSAIR.A                 | DHX30     |
| 1834 | 3 | 3.181 | 0.074 | 19/36  | P35659_DEK_HUMAN   | 1  | R.LTM*QVSSLQR.E                    | DEK       |
| 3379 | 2 | 3.18  | 0.328 | 16/18  | P35579_MYH9_HUMAN  | 0  | R.ALEQQVEEMK.T                     | MYH9      |
| 4058 | 2 | 3.179 | 0.181 | 19/24  | KV2A7_MOUSE        | 14 | R.FSGSGSGTDFTLK.I                  |           |
| 4767 | 2 | 3.178 | 0.277 | 13/28  | Q86YV6_MYLK4_HUMAN | 0  | K.VKCFLEKNSGDQDSR.S                | MYLK4     |
| 1802 | 2 | 3.178 | 0.265 | 15/18  | P35659_DEK_HUMAN   | 1  | R.LTM*QVSSLQR.E                    | DEK       |
| 7291 | 3 | 3.175 | 0.246 | 21/100 | Q07021_C1QBP_HUMAN | 2  | K.VEEQEPELTSTPNFVVEVIKNDGKK.A      | C1QBP     |
| 2258 | 2 | 3.174 | 0.429 | 19/24  | Q9BYX7_ACTBM_HUMAN | 6  | K.QEYDESGPSIVHR.K                  | POTEKP    |
| 4723 | 2 | 3.171 | 0.326 | 14/26  | P35579_MYH9_HUMAN  | 0  | R.IAEFTNLTETEEK.S                  | MYH9      |



|      |   |       |       |        |                    |    |                                     |           |
|------|---|-------|-------|--------|--------------------|----|-------------------------------------|-----------|
| 1768 | 3 | 3.17  | 0.362 | 35/112 | P35659_DEK_HUMAN   | 1  | -.M*SASAPAAEGEGTPTQPASEKEPEM*PGPR.E | DEK       |
| 6588 | 2 | 3.17  | 0.308 | 20/22  | P34931_HS71L_HUMAN | 1  | K.DAGVIAGLNVLR.I                    | HSPA1L    |
| 1172 | 2 | 3.168 | 0.301 | 13/22  | Q96L21_RL10L_HUMAN | 6  | R.GAFGKPGQTVAR.V                    | RPL10L    |
| 518  | 2 | 3.168 | 0.532 | 15/18  | P35579_MYH9_HUMAN  | 0  | K.THEAQIQEM*R.Q                     | MYH9      |
| 2894 | 3 | 3.168 | 0.288 | 21/40  | P35749_MYH11_HUMAN | 4  | K.KEEELQAALAR.L                     | MYH11     |
| 6085 | 2 | 3.165 | 0.215 | 16/28  | Q86YV6_MYLK4_HUMAN | 0  | K.VKCFLEKNSGDQDSR.S                 | MYLK4     |
| 5111 | 2 | 3.163 | 0.248 | 19/28  | P33778_H2B1B_HUMAN | 14 | K.AM*GIM*NSFVNDIFER.I               | HIST1H2BB |
| 506  | 2 | 3.162 | 0.056 | 12-Dec | P35659_DEK_HUMAN   | 3  | K.KKEEMLK.K                         | DEK       |
| 5060 | 3 | 3.162 | 0.373 | 21/52  | P12956_XRCC6_HUMAN | 1  | R.SDSFENPVLQQHFR.N                  | XRCC6     |
| 6270 | 2 | 3.161 | 0.398 | 14/26  | P35659_DEK_HUMAN   | 2  | K.KLLASANLEEVTMK.Q                  | DEK       |
| 1318 | 3 | 3.156 | 0.061 | 20/36  | P35579_MYH9_HUMAN  | 0  | K.THEAQIQEMR.Q                      | MYH9      |
| 4839 | 3 | 3.156 | 0.065 | 22/72  | SAV_STRAV          | 0  | R.NAHSATTWSGQYVGGAEAR.I             |           |
| 5618 | 2 | 3.156 | 0.178 | 17/34  | SAV1_STRVL         | 1  | R.INTQWLLTSGTTEANAWK.S              |           |
| 3661 | 3 | 3.155 | 0.198 | 22/52  | P12956_XRCC6_HUMAN | 1  | R.QILLEKEETEELKR.F                  | XRCC6     |
| 6873 | 2 | 3.154 | 0.162 | 15/22  | Q5M9N0_CD158_HUMAN | 0  | K.DSQSPPIETTK.T                     | CCDC158   |
| 6146 | 2 | 3.154 | 0.269 | 15/30  | Q5TAX3_TUT4_HUMAN  | 2  | R.M*DDFQLKGIVEEFVK.W                | ZCCHC11   |
| 3230 | 2 | 3.152 | 0.524 | 17/22  | P07437_TBB5_HUMAN  | 1  | R.ISVYYNEATGGK.Y                    | TUBB      |
| 8068 | 3 | 3.151 | 0.187 | 23/108 | P06748_NPM_HUMAN   | 0  | R.TVSLGAGAKDELHIVEAEAM*NYEGSPIK.V   | NPM1      |
| 5686 | 3 | 3.149 | 0.323 | 24/52  | P35579_MYH9_HUMAN  | 1  | K.KVIQYLAYVASSHK.S                  | MYH9      |
| 2377 | 3 | 3.149 | 0.541 | 19/60  | P54652_HSP72_HUMAN | 3  | K.STAGDTHLGGEDFDNR.M                | HSPA2     |
| 5134 | 3 | 3.148 | 0.388 | 14/36  | P11142_HSP7C_HUMAN | 3  | R.MVNHFAIEFK.R                      | HSPA8     |
| 1608 | 3 | 3.147 | 0.361 | 26/52  | P68400_CSK21_HUMAN | 3  | R.DVKPHNVM*IDHEHR.K                 | CSNK2A1   |
| 4985 | 3 | 3.146 | 0.358 | 19/56  | P68400_CSK21_HUMAN | 2  | K.EPFFHGHNDYDQLVR.I                 | CSNK2A1   |
| 4746 | 2 | 3.146 | 0.269 | 16/24  | P35659_DEK_HUMAN   | 2  | K.VYENYPTYDLTER.K                   | DEK       |
| 7470 | 2 | 3.146 | 0.503 | 18/24  | P35659_DEK_HUMAN   | 2  | K.LLASANLEEVTM*K.Q                  | DEK       |
| 5363 | 2 | 3.145 | 0.249 | 15/24  | P68400_CSK21_HUMAN | 4  | R.EAMEHPYFYTVVK.D                   | CSNK2A1   |
| 3520 | 2 | 3.143 | 0.175 | 14/16  | Q9UHB9_SRP68_HUMAN | 0  | K.LEALITQTR.A                       | SRP68     |
| 4743 | 3 | 3.135 | 0.238 | 23/64  | P68400_CSK21_HUMAN | 5  | R.GKYSEVFEAINITNNEK.V               | CSNK2A1   |
| 3634 | 2 | 3.134 | 0.265 | 14/16  | Q96QV6_H2A1A_HUMAN | 15 | R.AGLQFPVGR.I                       | HIST1H2AA |
| 6140 | 2 | 3.134 | 0.317 | 19/28  | Q6DN03_H2B2C_HUMAN | 1  | K.AM*GIM*NSFLNDIFER.I               | HIST2H2BC |
| 4269 | 3 | 3.133 | 0.25  | 25/100 | P35579_MYH9_HUMAN  | 0  | R.FLSNGHVITPGQDKDM*FQETM*EAM*R.I    | MYH9      |
| 8141 | 3 | 3.13  | 0.314 | 23/72  | P19784_CSK22_HUMAN | 1  | R.LIDWGLAEFYHPAQEYNVR.V             | CSNK2A2   |
| 4918 | 2 | 3.129 | 0.23  | 16/30  | Q5TAX3_TUT4_HUMAN  | 2  | R.M*DDFQLKGIVEEFVK.W                | ZCCHC11   |
| 8008 | 2 | 3.126 | 0.436 | 18/22  | P35659_DEK_HUMAN   | 3  | K.NVGQFSGFPFEK.G                    | DEK       |
| 3189 | 3 | 3.125 | 0.328 | 19/36  | P33778_H2B1B_HUMAN | 6  | R.KESYSIYVK.V                       | HIST1H2BB |
| 6503 | 3 | 3.125 | 0.069 | 21/64  | P68400_CSK21_HUMAN | 5  | R.GKYSEVFEAINITNNEK.V               | CSNK2A1   |
| 4364 | 3 | 3.125 | 0.143 | 23/64  | Q99417_MYCBP_HUMAN | 1  | K.HHLGAATPENPEIELLR.L               | MYCBP     |
| 4822 | 2 | 3.124 | 0.232 | 16/30  | Q5TAX3_TUT4_HUMAN  | 2  | R.M*DDFQLKGIVEEFVK.W                | ZCCHC11   |
| 6718 | 2 | 3.122 | 0.362 | 14/34  | P49411_EFTU_HUMAN  | 0  | R.TIGTGLVTNLTAMTEEEK.N              | TUFM      |
| 6883 | 2 | 3.121 | 0.497 | 18/40  | SAV1_STRVL         | 2  | R.YDSAPATDGSALTALGWTVAWK.N          |           |
| 6660 | 2 | 3.121 | 0.494 | 22/34  | Q00839_HNRPU_HUMAN | 0  | K.SSGPTSLFAVTVAPPGAR.Q              | HNRNPU    |
| 5122 | 2 | 3.117 | 0.463 | 18/26  | P11021_GRP78_HUMAN | 0  | R.ITPSYVAFTPEGER.L                  | HSPA5     |
| 1429 | 2 | 3.115 | 0.476 | 20/22  | P46087_NOP2_HUMAN  | 3  | K.GISAGAVQTAGK.K                    | NOP2      |
| 2659 | 2 | 3.114 | 0.331 | 16/18  | P35579_MYH9_HUMAN  | 0  | R.EMEALEDER.K                       | MYH9      |
| 6119 | 3 | 3.114 | 0.421 | 30/60  | P11021_GRP78_HUMAN | 0  | K.IEWLESHQDADIEDFK.A                | HSPA5     |
| 1300 | 3 | 3.113 | 0.275 | 20/44  | P62269_RS18_HUMAN  | 0  | K.RAGELTEDEVER.V                    | RPS18     |
| 6271 | 2 | 3.113 | 0.309 | 16/24  | P35659_DEK_HUMAN   | 2  | K.LLASANLEEVTM*K.Q                  | DEK       |
| 6228 | 2 | 3.113 | 0.363 | 17/22  | P54652_HSP72_HUMAN | 5  | R.ARFEELNADLFR.G                    | HSPA2     |
| 1719 | 2 | 3.111 | 0.225 | 16/20  | P62280_RS11_HUMAN  | 1  | K.EAIEGTYIDKK.C                     | RPS11     |
| 3749 | 2 | 3.11  | 0.349 | 19/26  | P62906_RL10A_HUMAN | 0  | K.AVDIPHM*DIEALKK.L                 | RPL10A    |
| 6171 | 2 | 3.11  | 0.339 | 15/24  | P62906_RL10A_HUMAN | 0  | K.AVDIPHM*DIEALKK.L                 | RPL10A    |
| 7148 | 3 | 3.109 | 0.419 | 23/68  | P11021_GRP78_HUMAN | 0  | K.DNHLLGTFDLTGIPPAPR.G              | HSPA5     |
| 2201 | 3 | 3.108 | 0.305 | 23/52  | P35659_DEK_HUMAN   | 2  | K.KPPTDEELKETIKK.L                  | DEK       |
| 8500 | 2 | 3.108 | 0.241 | 16/32  | P31943_HNRH1_HUMAN | 6  | R.ATENDIYNFFSPLNPVR.V               | HNRNPH1   |
| 5973 | 3 | 3.107 | 0.172 | 26/76  | P05387_RLA2_HUMAN  | 0  | K.VISELNGKNIEDVIAQGIGK.L            | RPLP2     |
| 6006 | 3 | 3.107 | 0.296 | 26/72  | P35659_DEK_HUMAN   | 1  | R.LTMQVSSLQREPFTIAQGGK.G            | DEK       |
| 6755 | 2 | 3.107 | 0.404 | 17/22  | P13010_XRCC5_HUMAN | 0  | K.DTLEDLFPPTTK.I                    | XRCC5     |
| 903  | 2 | 3.107 | 0.307 | 14/18  | P50402_EMD_HUMAN   | 1  | R.APGAGLGQDR.Q                      | EMD       |
| 2677 | 2 | 3.107 | 0.591 | 18/20  | Q02539_H11_HUMAN   | 4  | K.ALAAAGYDVEK.N                     | HIST1H1A  |
| 7563 | 2 | 3.107 | 0.449 | 13/20  | Q9NR30_DDX21_HUMAN | 0  | R.GVTFLLFPIQAK.T                    | DDX21     |
| 441  | 2 | 3.105 | 0.281 | 16/18  | P62805_H4_HUMAN    | 0  | R.DAVTYTEHAK.R                      | HIST1H4A  |
| 6166 | 2 | 3.104 | 0.294 | 17/20  | P12268_IMDH2_HUMAN | 1  | K.NLIDAGVDALR.V                     | IMPDH2    |
| 5327 | 2 | 3.104 | 0.468 | 17/36  | SAV_STRAV          | 0  | R.NAHSATTWSGQYVGGAEAR.I             |           |
| 8214 | 2 | 3.104 | 0.523 | 18/20  | Q9NR30_DDX21_HUMAN | 0  | K.TFSFAIPLIEK.L                     | DDX21     |
| 3120 | 2 | 3.104 | 0.279 | 19/24  | P35030_TRY3_HUMAN  | 1  | K.VLEGNEQFINAAK.I                   | PRSS3     |
| 4909 | 2 | 3.103 | 0.32  | 15/18  | P09493_TPM1_HUMAN  | 22 | R.IQLVEELDR.A                       | TPM1      |
| 8013 | 2 | 3.103 | 0.321 | 16/18  | P18124_RL7_HUMAN   | 1  | K.EANNFLWPFK.L                      | RPL7      |
| 9053 | 2 | 3.101 | 0.458 | 14/22  | P35659_DEK_HUMAN   | 3  | K.NVGQFSGFPFEK.G                    | DEK       |
| 1883 | 2 | 3.099 | 0.429 | 17/22  | P11142_HSP7C_HUMAN | 9  | R.RFDDAVVQSDM*K.H                   | HSPA8     |
| 1305 | 3 | 3.099 | 0.15  | 21/40  | P35659_DEK_HUMAN   | 2  | K.LKKPPTDEELK.E                     | DEK       |
| 3140 | 2 | 3.099 | 0.188 | 19/24  | KV2A7_MOUSE        | 14 | R.FSGSGGTDFTLK.I                    |           |
| 1805 | 3 | 3.095 | 0.287 | 22/52  | P35659_DEK_HUMAN   | 2  | K.KPPTDEELKETIKK.L                  | DEK       |
| 4832 | 2 | 3.091 | 0.255 | 15/28  | P08107_HSP71_HUMAN | 0  | K.NQVALNPQNTVFDAR.R                 | HSPA1A    |
| 1395 | 2 | 3.089 | 0.197 | 15/16  | P84098_RL19_HUMAN  | 2  | K.LLADQAEAR.R                       | RPL19     |
| 6044 | 2 | 3.086 | 0.436 | 17/20  | O43143_DHX15_HUMAN | 0  | R.SNLGSVVLQLK.K                     | DHX15     |
| 6762 | 2 | 3.085 | 0.288 | 16/22  | P35659_DEK_HUMAN   | 3  | K.NVGQFSGFPFEK.G                    | DEK       |
| 569  | 2 | 3.084 | 0.388 | 14/16  | P35579_MYH9_HUMAN  | 0  | R.ALEAM*EQK.A                       | MYH9      |

|      |   |       |       |        |                             |    |                                   |           |
|------|---|-------|-------|--------|-----------------------------|----|-----------------------------------|-----------|
| 4424 | 3 | 3.084 | 0.285 | 29/72  | SAV_STRAV                   | 0  | R.NAHSATTWSGQYVGGAEAR.I           |           |
| 6590 | 2 | 3.082 | 0.427 | 17/36  | P35579_MYH9_HUMAN           | 0  | K.NM*DPLNDNIATLLHQSSDK.F          | MYH9      |
| 8528 | 3 | 3.082 | 0.374 | 18/44  | P19784_CSK22_HUMAN          | 1  | K.QLYQILTFDIR.F                   | CSNK2A2   |
| 2110 | 2 | 3.082 | 0.377 | 14/18  | P50402_EMD_HUMAN            | 1  | K.KEDALLYQSK.G                    | EMD       |
| 4328 | 3 | 3.078 | 0.285 | 22/52  | P35659_DEK_HUMAN            | 2  | K.KLLASANLEEVTM*K.Q               | DEK       |
| 7731 | 2 | 3.076 | 0.418 | 15/36  | SAV_STRAV                   | 0  | R.NAHSATTWSGQYVGGAEAR.I           |           |
| 8238 | 2 | 3.076 | 0.329 | Dec-38 | P68400_CSK21_HUMAN          | 4  | R.FVHSENQHLVSPALDFLDK.L           | CSNK2A1   |
| 5672 | 2 | 3.075 | 0.245 | 16/20  | Q08945_SSRP1_HUMAN          | 0  | K.ASSGLLYPLER.G                   | SSRP1     |
| 671  | 2 | 3.074 | 0.311 | 14/16  | Q9UNX3_RL26L_HUMAN          | 7  | R.KDDEVQVVR.G                     | RPL26L1   |
| 4447 | 2 | 3.072 | 0.223 | 17/20  | Q7L2E3_DHX30_HUMAN          | 1  | K.AIFQPPVGV.R.K                   | DHX30     |
| 3673 | 2 | 3.071 | 0.276 | 16/18  | P35580_MYH10_HUMAN          | 6  | K.KFDQLLAEEK.S                    | MYH10     |
| 4908 | 2 | 3.071 | 0.554 | 16/20  | D6RDA2_D6RDA2_HUMAN         | 0  | R.ILNFLM*HPKPS.-                  | DEK       |
| 6028 | 3 | 3.069 | 0.221 | 25/72  | P35579_MYH9_HUMAN           | 0  | R.QKHSQAVEELAEQLEQTKR.V           | MYH9      |
| 8185 | 2 | 3.069 | 0.456 | 20/24  | P35659_DEK_HUMAN            | 2  | K.LLASANLEEVTM.K.Q                | DEK       |
| 4628 | 2 | 3.069 | 0.31  | 16/24  | P35579_MYH9_HUMAN           | 0  | R.QRYEILTPNSIPK.G                 | MYH9      |
| 5206 | 2 | 3.069 | 0.425 | 14/20  | P35579_MYH9_HUMAN           | 0  | R.YEILTPNSIPK.G                   | MYH9      |
| 8127 | 2 | 3.067 | 0.412 | 16/30  | O00425_IF2B3_HUMAN          | 0  | K.ITISPLQELTYLNP.R.T              | IGF2BP3   |
| 3882 | 2 | 3.067 | 0.395 | 17/20  | P46776_RL27A_HUMAN          | 3  | K.TGAAPIIDVVR.S                   | RPL27A    |
| 5175 | 3 | 3.066 | 0.335 | 18/56  | P68400_CSK21_HUMAN          | 2  | K.EPFFHGHNDYDQLVR.I               | CSNK2A1   |
| 3987 | 2 | 3.065 | 0.384 | 14/24  | P62805_H4_HUMAN             | 0  | R.KTVTAM*DVVYALK.R                | HIST1H4A  |
| 5832 | 3 | 3.064 | 0.132 | 22/52  | P67870_CSK2B_HUMAN          | 4  | K.FNLTLGNEQVPHYR.Q                | CSNK2B    |
| 6837 | 2 | 3.062 | 0.333 | 18/26  | P35579_MYH9_HUMAN           | 0  | R.IMGIPEEQMGLLR.V                 | MYH9      |
| 7268 | 2 | 3.061 | 0.057 | 14/28  | A0A088AWL3_A0A088AWL3_HUMAN | 0  | R.GSPMMNRTSDVSSNK.S               | NCOR1     |
| 4333 | 3 | 3.061 | 0.139 | 24/56  | P11021_GRP78_HUMAN          | 0  | K.NQLTSNPENTVFDK.R                | HSPA5     |
| 5395 | 2 | 3.06  | 0.172 | 17/24  | P19784_CSK22_HUMAN          | 2  | K.EAMEHPYFYPVVK.E                 | CSNK2A2   |
| 6112 | 2 | 3.058 | 0.325 | 16/20  | Q9Y3B9_RRP15_HUMAN          | 0  | R.GVVQLFNAVQK.H                   | RRP15     |
| 6728 | 2 | 3.058 | 0.358 | 15/18  | Q15208_STK38_HUMAN          | 0  | R.LGLEDFESLK.V                    | STK38     |
| 4310 | 2 | 3.058 | 0.328 | 16/18  | P35659_DEK_HUMAN            | 1  | R.LTMQVSSLQR.E                    | DEK       |
| 4651 | 2 | 3.056 | 0.24  | 14/16  | P35579_MYH9_HUMAN           | 0  | R.LEVNLQAMK.A                     | MYH9      |
| 6404 | 2 | 3.05  | 0.309 | 16/18  | P35749_MYH11_HUMAN          | 2  | R.DLGEELALK.T                     | MYH11     |
| 2565 | 2 | 3.049 | 0.248 | 17/20  | P62736_ACTA_HUMAN           | 6  | K.EITALAPSTM*K.I                  | ACTA2     |
| 7055 | 3 | 3.047 | 0.278 | 21/60  | Q71U36_TBA1A_HUMAN          | 8  | R.IHFPLATYAPVISA.E.K.A            | TUBA1A    |
| 3562 | 2 | 3.047 | 0.398 | 15/16  | P62913_RL11_HUMAN           | 0  | K.YDGIILPGK.-                     | RPL11     |
| 5769 | 2 | 3.046 | 0.452 | 19/22  | P62805_H4_HUMAN             | 0  | K.TVTAMDVVYALK.R                  | HIST1H4A  |
| 1747 | 3 | 3.043 | 0.269 | 23/56  | P19784_CSK22_HUMAN          | 0  | R.DVKPHNVMMIDHQKK.L               | CSNK2A2   |
| 3257 | 3 | 3.043 | 0.518 | 32/112 | P35659_DEK_HUMAN            | 1  | -.MSASAPAAEGEGTPTQPASEKEPEMPGPR.E | DEK       |
| 6857 | 2 | 3.043 | 0.291 | 17/22  | P35659_DEK_HUMAN            | 3  | K.NVGQFSGFFPEK.G                  | DEK       |
| 8356 | 2 | 3.042 | 0.238 | 20/30  | P35749_MYH11_HUMAN          | 4  | K.QLLQANPILEAFGNAK.T              | MYH11     |
| 4888 | 3 | 3.042 | 0.446 | 19/56  | P68400_CSK21_HUMAN          | 2  | K.EPFFHGHNDYDQLVR.I               | CSNK2A1   |
| 8600 | 2 | 3.041 | 0.299 | 16/22  | P19784_CSK22_HUMAN          | 1  | K.QLYQILTFDIR.F                   | CSNK2A2   |
| 1577 | 2 | 3.037 | 0.434 | 15/16  | P62269_RS18_HUMAN           | 0  | R.VITIM*QNPR.Q                    | RPS18     |
| 7949 | 3 | 3.033 | 0.167 | 26/88  | P35579_MYH9_HUMAN           | 0  | K.DFSALESQQLDQTQELLQEENRQK.L      | MYH9      |
| 5350 | 2 | 3.033 | 0.374 | 18/22  | P38646_GRP75_HUMAN          | 0  | K.DAGQISGLNLVR.V                  | HSPA9     |
| 3972 | 2 | 3.03  | 0.367 | 18/34  | Q15517_CDSN_HUMAN           | 1  | K.GSPGVPSFAAGPPISEGK.Y            | CDSN      |
| 7119 | 3 | 3.029 | 0.244 | 19/80  | P60709_ACTB_HUMAN           | 1  | K.DLYANTVLSGGTTMYPGIADR.M         | ACTB      |
| 6688 | 2 | 3.028 | 0.323 | 17/22  | P19784_CSK22_HUMAN          | 2  | K.VLGTEELYGYL.K                   | CSNK2A2   |
| 1354 | 3 | 3.028 | 0.331 | 24/48  | P62841_RS15_HUMAN           | 5  | K.HGRPGIGATHSSR.F                 | RPS15     |
| 4731 | 2 | 3.025 | 0.307 | 17/26  | Q14103_HNRPD_HUMAN          | 4  | K.IFVGGLSPDTPEEK.I                | HNRNP     |
| 4188 | 2 | 3.025 | 0.399 | 13/16  | P39023_RL3_HUMAN            | 3  | R.HGSLGFLPR.K                     | RPL3      |
| 2857 | 2 | 3.025 | 0.596 | 15/18  | P60709_ACTB_HUMAN           | 4  | R.GYSFTTAEER.E                    | ACTB      |
| 4524 | 2 | 3.022 | 0.308 | 16/18  | P35659_DEK_HUMAN            | 1  | R.LTMQVSSLQR.E                    | DEK       |
| 5065 | 2 | 3.019 | 0.361 | 15/22  | P62277_RS13_HUMAN           | 1  | K.GLTPSQIGVILR.D                  | RPS13     |
| 5366 | 3 | 3.008 | 0.374 | 21/40  | Q9BYX7_ACTBM_HUMAN          | 19 | K.IWHHTFYNELR.V                   | POTEKP    |
| 3959 | 2 | 3.005 | 0.358 | 17/24  | P35659_DEK_HUMAN            | 2  | K.LLASANLEEVTM*K.Q                | DEK       |
| 6054 | 2 | 3.005 | 0.291 | 16/20  | P62304_RUXE_HUMAN           | 0  | K.VM*VQPINLIFR.Y                  | SNRPE     |
| 4919 | 2 | 3.004 | 0.052 | 16/30  | Q5TAX3_TUT4_HUMAN           | 2  | R.M*DDFQLKGIVEEKV.K.W             | ZCCHC11   |
| 3737 | 3 | 3.004 | 0.098 | 14/36  | P35580_MYH10_HUMAN          | 6  | K.KFDQLLAEEK.S                    | MYH10     |
| 7795 | 2 | 3.003 | 0.254 | 14/22  | Q8N6Y2_LRC17_HUMAN          | 0  | K.KVPNNIPPDIK.L                   | LRR17     |
| 4335 | 3 | 3.003 | 0.325 | 26/76  | P13010_XRCC5_HUMAN          | 0  | K.DQVTAQEIFQDNHEDGPTAK.K          | XRCC5     |
| 891  | 3 | 3.001 | 0.382 | 17/48  | P09493_TPM1_HUMAN           | 22 | K.LEEAKEKADESER.G                 | TPM1      |
| 2723 | 2 | 3.001 | 0.419 | 15/18  | P62807_H2B1C_HUMAN          | 9  | R.KESYSVYVYK.V                    | HIST1H2BC |
| 5960 | 2 | 2.997 | 0.359 | 15/18  | P35659_DEK_HUMAN            | 3  | K.SIC#EVLDLER.S                   | DEK       |
| 3785 | 2 | 2.994 | 0.244 | 14/16  | P35580_MYH10_HUMAN          | 6  | K.KFDQLLAEEK.S                    | MYH10     |
| 7477 | 2 | 2.99  | 0.239 | 18/28  | Q7L2E3_DHX30_HUMAN          | 1  | R.ENYLEENLLYAPSLR.F               | DHX30     |
| 3173 | 2 | 2.983 | 0.053 | 15/26  | Q96QV6_H2A1A_HUMAN          | 12 | R.HLQLAIRNDEELNK.L                | HIST1H2AA |
| 3693 | 2 | 2.982 | 0.2   | 15/18  | P35659_DEK_HUMAN            | 1  | R.LTMQVSSLQR.E                    | DEK       |
| 7520 | 2 | 2.982 | 0.474 | 15/22  | P35659_DEK_HUMAN            | 3  | K.NVGQFSGFFPEK.G                  | DEK       |
| 4309 | 2 | 2.981 | 0.321 | 16/20  | P35580_MYH10_HUMAN          | 1  | K.VDYKADEWLM*K.N                  | MYH10     |
| 3827 | 2 | 2.979 | 0.325 | 15/16  | P19338_NUCL_HUMAN           | 0  | K.NDLAVVDVR.I                     | NCL       |
| 6367 | 2 | 2.972 | 0.086 | 18/36  | P05387_RLA2_HUMAN           | 0  | R.VASYLLAALGNSSPSAK.D             | RPLP2     |
| 4663 | 2 | 2.966 | 0.166 | 14/38  | Q12906_ILF3_HUMAN           | 0  | K.RFVM*EVEVDGQKFGGAGSNK.K         | ILF3      |
| 5340 | 2 | 2.966 | 0.207 | 17/18  | P35659_DEK_HUMAN            | 1  | R.LTMQVSSLQR.E                    | DEK       |
| 4910 | 2 | 2.96  | 0.509 | 20/28  | P68400_CSK21_HUMAN          | 2  | K.EPFFHGHNDYDQLVR.I               | CSNK2A1   |
| 2250 | 2 | 2.96  | 0.234 | 15/16  | P60660_MYL6_HUMAN           | 11 | R.HVLVTLGEM                       | MYL6      |
| 4884 | 2 | 2.957 | 0.364 | 16/38  | P35030_TRY3_HUMAN           | 1  | R.LGEHNIKVLEGNQFINAAK.I           | PRSS3     |
| 6654 | 2 | 2.955 | 0.274 | 13/24  | Q95140_MFN2_HUMAN           | 0  | R.ENLEQEIAAMNKK.I                 | MFN2      |

|      |   |       |       |        |                    |    |                          |           |
|------|---|-------|-------|--------|--------------------|----|--------------------------|-----------|
| 5318 | 2 | 2.955 | 0.275 | 16/20  | P11021_GRP78_HUMAN | 0  | R.NELESYAYSLK.N          | HSPA5     |
| 7501 | 2 | 2.952 | 0.069 | 17/18  | P35659_DEK_HUMAN   | 1  | R.LTMQVSSLQR.E           | DEK       |
| 8495 | 2 | 2.952 | 0.359 | 19/22  | Q15397_K0020_HUMAN | 0  | K.VFLDFFTYAPPK.L         | KIAA0020  |
| 844  | 2 | 2.95  | 0.505 | 20/22  | P62736_ACTA_HUMAN  | 21 | K.DSYVGDQAQSKR.G         | ACTA2     |
| 1466 | 2 | 2.949 | 0.375 | 14/16  | P06748_NPM_HUMAN   | 0  | K.GPSSVEDIK.A            | NPM1      |
| 3000 | 2 | 2.949 | 0.391 | 18/20  | Q16695_H31T_HUMAN  | 7  | R.EIAQDFKTDLR.F          | HIST3H3   |
| 4012 | 2 | 2.949 | 0.367 | 15/24  | P35030_TRY3_HUMAN  | 1  | K.VLEGNEQFINAAK.I        | PRSS3     |
| 7875 | 2 | 2.943 | 0.45  | 18/36  | SAV_STRAV          | 0  | R.NAHSATTWSGQYVGGAEAR.I  |           |
| 4489 | 2 | 2.941 | 0.305 | 15/20  | P62736_ACTA_HUMAN  | 26 | R.AVFPISVGRPR.H          | ACTA2     |
| 5619 | 2 | 2.94  | 0.33  | 15/30  | P30050_RL12_HUMAN  | 0  | R.QAQIEVPSASALI.K.A      | RPL12     |
| 3865 | 2 | 2.938 | 0.318 | 15/16  | P39019_RS19_HUMAN  | 1  | R.VLQALEGLK.M            | RPS19     |
| 4537 | 2 | 2.932 | 0.201 | 28-Oct | Q92665_RT31_HUMAN  | 0  | K.ETSESQDSEKENTKK.D      | MRPS31    |
| 1530 | 2 | 2.931 | 0.288 | 16/18  | P62736_ACTA_HUMAN  | 27 | K.AGFAGDDAPR.A           | ACTA2     |
| 3056 | 2 | 2.928 | 0.14  | 13/22  | Q16526_CRY1_HUMAN  | 0  | K.LSIEYDSEPFQK.E         | CRY1      |
| 2951 | 2 | 2.924 | 0.111 | 19/20  | P19105_ML12A_HUMAN | 4  | K.LNGTDPEDVIR.N          | MYL12A    |
| 3738 | 2 | 2.921 | 0.265 | 14/16  | Q96QV6_H2A1A_HUMAN | 15 | R.AGLQFPVGR.I            | HIST1H2AA |
| 7045 | 2 | 2.918 | 0.341 | 16/30  | O00159_MYO1C_HUMAN | 1  | R.DGTIDFTPGSELLTK.A      | MYO1C     |
| 3704 | 2 | 2.918 | 0.136 | 16/20  | P35579_MYH9_HUMAN  | 0  | K.DVLLQVDDERR.N          | MYH9      |
| 2085 | 2 | 2.917 | 0.165 | 16/18  | Q9UKN7_MYO15_HUMAN | 1  | R.RPPAPQPAPR.T           | MYO15A    |
| 2288 | 2 | 2.915 | 0.254 | 14/16  | P19784_CSK22_HUMAN | 1  | R.VYAEVNSLR.S            | CSNK2A2   |
| 3966 | 2 | 2.906 | 0.162 | 20/24  | KV2A7_MOUSE        | 14 | R.FSGSGSGTDFTLK.I        |           |
| 2994 | 2 | 2.906 | 0.359 | 14/18  | P35244_RFA3_HUMAN  | 1  | K.M*FILSDGEGK.N          | RPA3      |
| 5067 | 2 | 2.904 | 0.423 | 16/22  | Q8WXX5_DNJC9_HUMAN | 0  | K.ELGLDEGVDSLK.A         | DNAJC9    |
| 5456 | 2 | 2.904 | 0.407 | 19/24  | P35659_DEK_HUMAN   | 2  | K.LLASANLEEVTM*K.Q       | DEK       |
| 1091 | 2 | 2.903 | 0.113 | 18/20  | P35579_MYH9_HUMAN  | 0  | K.VKLQEM*EGTVK.S         | MYH9      |
| 3506 | 2 | 2.903 | 0.206 | 14/16  | Q9NW13_RBM28_HUMAN | 0  | R.FNQLVEQYK.Q            | RBM28     |
| 7600 | 2 | 2.903 | 0.062 | 16/36  | P05186_PPBT_HUMAN  | 0  | K.NVIM*FLGDGMGVSTVTAAR.I | ALPL      |
| 6872 | 2 | 2.902 | 0.34  | 14/24  | P68400_CSK21_HUMAN | 2  | K.VLGTEDLYDYDK.Y         | CSNK2A1   |
| 7120 | 2 | 2.902 | 0.196 | 17/24  | O76094_SRP72_HUMAN | 1  | R.TEEALQLYNIQI.L         | SRP72     |
| 3560 | 2 | 2.897 | 0.364 | 16/18  | P62318_SMD3_HUMAN  | 0  | R.VAQLQEVYIR.G           | SNRPD3    |
| 5131 | 2 | 2.896 | 0.355 | 16/18  | P35659_DEK_HUMAN   | 1  | R.LTMQVSSLQR.E           | DEK       |
| 4348 | 2 | 2.893 | 0.478 | 15/24  | P62805_H4_HUMAN    | 0  | K.TVTAM*DVVYALKR.Q       | HIST1H4A  |
| 4004 | 2 | 2.889 | 0.186 | 13/14  | P68400_CSK21_HUMAN | 4  | K.YNIELDPR.F             | CSNK2A1   |
| 7130 | 2 | 2.888 | 0.3   | 17/22  | P35659_DEK_HUMAN   | 3  | K.NVGGQFSGFPFEK.G        | DEK       |
| 5940 | 2 | 2.885 | 0.396 | 16/26  | P11021_GRP78_HUMAN | 0  | K.SDIDEIVLVGGSTR.I       | HSPA5     |
| 5108 | 2 | 2.884 | 0.269 | 15/18  | P35659_DEK_HUMAN   | 1  | R.LTMQVSSLQR.E           | DEK       |
| 741  | 2 | 2.884 | 0.326 | 14/16  | Q9UNX3_RL26L_HUMAN | 7  | R.KDDEVQVVR.G            | RPL26L1   |
| 5257 | 2 | 2.881 | 0.552 | 19/24  | P27694_RFA1_HUMAN  | 0  | K.VVPIASLTPYQSK.W        | RPA1      |
| 3550 | 2 | 2.881 | 0.476 | 14/18  | Q99848_EBP2_HUMAN  | 1  | R.ESYDDVSSFR.A           | EBNA1BP2  |
| 1242 | 2 | 2.881 | 0.191 | 16/20  | P35659_DEK_HUMAN   | 2  | K.LKKPPTDEELK.E          | DEK       |
| 2736 | 2 | 2.877 | 0.242 | 14/18  | Q6P1J9_CDC73_HUMAN | 0  | K.EGIVQTEQIR.S           | CDC73     |
| 4036 | 2 | 2.875 | 0.235 | 15/18  | Q71UI9_H2AV_HUMAN  | 3  | R.GDEELDSLK.A            | H2AFV     |
| 3266 | 2 | 2.874 | 0.356 | 17/28  | P35659_DEK_HUMAN   | 2  | K.LKKPPTDEELKETIK.K      | DEK       |
| 3509 | 2 | 2.867 | 0.24  | 13/18  | P35659_DEK_HUMAN   | 1  | R.LTMQVSSLQR.E           | DEK       |
| 2704 | 2 | 2.865 | 0.303 | 14/18  | P62277_RS13_HUMAN  | 2  | K.GLSQSALPYR.R           | RPS13     |
| 3625 | 2 | 2.859 | 0.262 | 14-Dec | P39023_RL3_HUMAN   | 2  | K.IGQGYLIK.D             | RPL3      |
| 4319 | 2 | 2.859 | 0.284 | 15/24  | P12956_XRCC6_HUMAN | 1  | K.ELVYPPDYNPEGK.V        | XRCC6     |
| 2896 | 2 | 2.859 | 0.128 | 13/16  | P18124_RL7_HUMAN   | 1  | K.SVNELIYKR.G            | RPL7      |
| 7955 | 2 | 2.856 | 0.226 | 16/22  | P68400_CSK21_HUMAN | 3  | K.QLYQTLTDYDIR.F         | CSNK2A1   |
| 997  | 2 | 2.853 | 0.177 | 17/20  | P62736_ACTA_HUMAN  | 22 | R.HQGVM*VGMGQK.D         | ACTA2     |
| 8558 | 2 | 2.853 | 0.268 | 14/28  | P68400_CSK21_HUMAN | 3  | R.TPALVFEHVNTDFK.Q       | CSNK2A1   |
| 3913 | 2 | 2.848 | 0.334 | 15/18  | P35244_RFA3_HUMAN  | 1  | K.MFILSDGEGK.N           | RPA3      |
| 7024 | 2 | 2.847 | 0.36  | 15/16  | Q71U36_TBA1A_HUMAN | 7  | K.EIIDLVLDR.I            | TUBA1A    |
| 3237 | 2 | 2.834 | 0.272 | 16/20  | Q9UNX3_RL26L_HUMAN | 8  | -M*KFNPFVTSDR.S          | RPL26L1   |
| 7919 | 2 | 2.834 | 0.426 | 17/22  | P35659_DEK_HUMAN   | 3  | K.NVGGQFSGFPFEK.G        | DEK       |
| 8014 | 2 | 2.833 | 0.425 | 17/32  | P05388_RLA0_HUMAN  | 4  | R.VLALSVETDYTFPLAEK.V    | RPLP0     |
| 6057 | 2 | 2.831 | 0.21  | 17/24  | P35659_DEK_HUMAN   | 2  | K.LLASANLEEVTM*K.Q       | DEK       |
| 5022 | 2 | 2.829 | 0.272 | 15/18  | P35659_DEK_HUMAN   | 1  | R.LTMQVSSLQR.E           | DEK       |
| 1496 | 2 | 2.828 | 0.241 | 15/18  | P35659_DEK_HUMAN   | 1  | R.LTM*QVSSLQR.E          | DEK       |
| 1446 | 2 | 2.822 | 0.371 | 15/18  | P35579_MYH9_HUMAN  | 0  | R.EM*EAELDER.K           | MYH9      |
| 1711 | 2 | 2.817 | 0.207 | 12-Nov | P35580_MYH10_HUMAN | 5  | R.TVGQLYK.E              | MYH10     |
| 1742 | 2 | 2.811 | 0.327 | 14/16  | P35579_MYH9_HUMAN  | 0  | R.ALEAEAMEQK.A           | MYH9      |
| 291  | 2 | 2.81  | 0.358 | 14/16  | P62277_RS13_HUMAN  | 2  | R.DSHGVAQVR.F            | RPS13     |
| 3420 | 2 | 2.801 | 0.318 | 14/16  | P62913_RL11_HUMAN  | 0  | K.YDGIILPGK.-            | RPL11     |
| 5068 | 2 | 2.796 | 0.205 | 18-Dec | P35579_MYH9_HUMAN  | 0  | K.ALELDSNLYR.I           | MYH9      |
| 3892 | 2 | 2.794 | 0.268 | 15/20  | P18124_RL7_HUMAN   | 3  | K.AGNFYVPAEPK.L          | RPL7      |
| 4997 | 2 | 2.788 | 0.504 | 17/28  | P68400_CSK21_HUMAN | 2  | K.EPFFHGHNDYDQLVR.I      | CSNK2A1   |
| 2589 | 2 | 2.788 | 0.407 | 20-Dec | P46778_RL21_HUMAN  | 2  | K.HGVVPLATYM*R.I         | RPL21     |
| 4551 | 2 | 2.785 | 0.122 | 14/24  | P35659_DEK_HUMAN   | 2  | K.LLASANLEEVTMK.Q        | DEK       |
| 7886 | 2 | 2.779 | 0.253 | 13/28  | P19784_CSK22_HUMAN | 1  | K.YSEVFEAINITNNER.V      | CSNK2A2   |
| 5474 | 2 | 2.774 | 0.217 | 15/26  | P35659_DEK_HUMAN   | 2  | K.KLLASANLEEVTM*K.Q      | DEK       |
| 381  | 2 | 2.772 | 0.233 | 16/20  | P62736_ACTA_HUMAN  | 22 | R.HQGVM*VGM*GQK.D        | ACTA2     |
| 4028 | 2 | 2.759 | 0.313 | 15/18  | P35579_MYH9_HUMAN  | 0  | R.TEMEDLMSSK.D           | MYH9      |
| 1634 | 2 | 2.756 | 0.138 | 13/16  | P35579_MYH9_HUMAN  | 0  | K.GALALEEK.R             | MYH9      |
| 3028 | 2 | 2.754 | 0.283 | 14/16  | P35579_MYH9_HUMAN  | 0  | R.LEVNLQAM*K.A           | MYH9      |
| 4654 | 2 | 2.754 | 0.239 | 18-Dec | P26373_RL13_HUMAN  | 2  | R.VATWFNQPAR.K           | RPL13     |
| 3448 | 2 | 2.748 | 0.123 | 14-Dec | P12268_IMDH2_HUMAN | 2  | R.LVGISSR.D              | IMPDH2    |
| 180  | 2 | 2.746 | 0.081 | 14-Dec | P35579_MYH9_HUMAN  | 0  | K.LKQVEDEK.N             | MYH9      |
| 5288 | 2 | 2.74  | 0.16  | 16/20  | P38646_GRP75_HUMAN | 0  | K.VQQTQVDFLGR.A          | HSPA9     |

|      |   |       |       |        |                    |    |                             |           |
|------|---|-------|-------|--------|--------------------|----|-----------------------------|-----------|
| 5055 | 2 | 2.739 | 0.17  | 30-Dec | Q5TAX3_TUT4_HUMAN  | 2  | R.M*DDFQLKGIVEEKVFK.W       | ZCHC11    |
| 1363 | 2 | 2.737 | 0.219 | 17/20  | P35579_MYH9_HUMAN  | 0  | R.QLEEAEEEEAQR.A            | MYH9      |
| 1690 | 2 | 2.736 | 0.17  | 15/16  | P35659_DEK_HUMAN   | 3  | R.SGVNSELVK.R               | DEK       |
| 1440 | 2 | 2.733 | 0.335 | 15/18  | P62736_ACTA_HUMAN  | 27 | K.AGFAGDDAPR.A              | ACTA2     |
| 1575 | 2 | 2.732 | 0.278 | 13/16  | P62269_RS18_HUMAN  | 0  | R.VLNTNIDGR.R               | RPS18     |
| 7548 | 2 | 2.732 | 0.121 | 20/26  | P04406_G3P_HUMAN   | 0  | K.LVINGNPITIFQER.D          | GAPDH     |
| 4343 | 2 | 2.726 | 0.253 | 21/26  | P62913_RL11_HUMAN  | 2  | K.VLEQLTGQTPVFSK.A          | RPL11     |
| 4643 | 2 | 2.722 | 0.428 | 15/18  | Q9NW13_RBM28_HUMAN | 1  | R.TVAVDWAVAK.D              | RBM28     |
| 5430 | 2 | 2.72  | 0.265 | 14/16  | P12956_XRCC6_HUMAN | 1  | R.LGSLVDEFK.E               | XRCC6     |
| 5843 | 2 | 2.718 | 0.288 | 16/20  | Q9Y3B9_RRP15_HUMAN | 0  | K.SEEGPGWTILR.D             | RRP15     |
| 1083 | 2 | 2.716 | 0.239 | 14/18  | P35659_DEK_HUMAN   | 3  | R.SGVNSELVKR.I              | DEK       |
| 2966 | 2 | 2.713 | 0.348 | 15/18  | P05186_PPBT_HUMAN  | 0  | R.DIDVIM*GGGR.K             | ALPL      |
| 653  | 2 | 2.712 | 0.45  | 14/18  | P35579_MYH9_HUMAN  | 0  | R.TEM*EDLM*SSK.D            | MYH9      |
| 9352 | 2 | 2.71  | 0.371 | 13/40  | SAV1_STRVL         | 2  | R.YDSAPATDGSALTALGWTVAWK.N  |           |
| 3824 | 2 | 2.706 | 0.257 | 12-Nov | P68400_CSK21_HUMAN | 4  | R.FNDILGR.H                 | CSNK2A1   |
| 5866 | 2 | 2.706 | 0.084 | 17/24  | P35659_DEK_HUMAN   | 2  | K.LLASANLEEVTM*K.Q          | DEK       |
| 3427 | 2 | 2.705 | 0.366 | 16/20  | P24844_MYL9_HUMAN  | 0  | R.FTDEEVDEMYR.E             | MYL9      |
| 4102 | 2 | 2.704 | 0.304 | 14-Dec | P68400_CSK21_HUMAN | 4  | K.YNIELDPR.F                | CSNK2A1   |
| 1948 | 2 | 2.703 | 0.477 | 14-Dec | P15927_RFA2_HUMAN  | 1  | K.APTNIVYK.I                | RPA2      |
| 3511 | 2 | 2.699 | 0.251 | 15/18  | P62805_H4_HUMAN    | 0  | R.ISGLIYEETR.G              | HIST1H4A  |
| 2650 | 2 | 2.698 | 0.28  | 12-Dec | Q96QV6_H2A1A_HUMAN | 16 | R.HLQLAIR.N                 | HIST1H2AA |
| 8468 | 2 | 2.697 | 0.437 | Dec-40 | P06748_NPM_HUMAN   | 1  | K.M*SVQPTVSLGGFEITPPVVL.R   | NPM1      |
| 4615 | 2 | 2.697 | 0.26  | 13/42  | Q8NHW5_RLAOL_HUMAN | 8  | R.AGAIAPC*EVTVPAQNTGLGPEK.T | RPLPO6    |
| 6265 | 2 | 2.686 | 0.486 | 16/24  | P68400_CSK21_HUMAN | 3  | R.GGPNITLADIVK.D            | CSNK2A1   |
| 40   | 2 | 2.682 | 0.141 | 14-Nov | P35579_MYH9_HUMAN  | 2  | K.VNKDDIQK.M                | MYH9      |
| 6061 | 2 | 2.681 | 0.356 | 14/24  | P12268_IMDH2_HUMAN | 2  | R.EDLVVAPAGITLK.E           | IMPDH2    |
| 374  | 2 | 2.673 | 0.238 | 14/18  | P38646_GRP75_HUMAN | 0  | R.KDSETGENIR.Q              | HSPA9     |
| 5333 | 2 | 2.673 | 0.128 | 12-Nov | P35579_MYH9_HUMAN  | 0  | K.FVSELWK.D                 | MYH9      |
| 873  | 2 | 2.672 | 0.258 | 16-Dec | P35659_DEK_HUMAN   | 2  | K.KPPTDEELK.E               | DEK       |
| 6292 | 2 | 2.672 | 0.39  | 17/20  | P35580_MYH10_HUMAN | 1  | K.LDPHLVLDQLR.C             | MYH10     |
| 5311 | 2 | 2.671 | 0.358 | 13/20  | Q7L2E3_DHX30_HUMAN | 1  | R.LQSDDILPLGK.D             | DHX30     |
| 2165 | 2 | 2.668 | 0.378 | 14/24  | Q9BYX7_ACTBM_HUMAN | 6  | K.QEYDESGPSIVHR.K           | POTEKP    |
| 5412 | 2 | 2.667 | 0.283 | 13/14  | P62269_RS18_HUMAN  | 1  | K.IPDWFLNR.Q                | RPS18     |
| 2701 | 2 | 2.662 | 0.197 | 14/22  | P15927_RFA2_HUMAN  | 1  | K.IDDMTAAAPM*DVR.Q          | RPA2      |
| 1212 | 2 | 2.661 | 0.143 | 14/18  | P35659_DEK_HUMAN   | 1  | R.LTM*QVSSLQR.E             | DEK       |
| 8683 | 2 | 2.66  | 0.154 | 14/22  | P35659_DEK_HUMAN   | 3  | K.NVGQFSGFPFEK.G            | DEK       |
| 1563 | 2 | 2.654 | 0.441 | 14/22  | P46777_RL5_HUMAN   | 0  | K.HIM*GQNVADYMR.Y           | RPL5      |
| 3914 | 2 | 2.653 | 0.276 | 12-Nov | P68400_CSK21_HUMAN | 4  | R.FNDILGR.H                 | CSNK2A1   |
| 2046 | 2 | 2.652 | 0.27  | 15/18  | P62899_RL31_HUMAN  | 0  | K.NLQTVNVDEN.-              | RPL31     |
| 5718 | 2 | 2.651 | 0.148 | 30-Dec | P30050_RL12_HUMAN  | 0  | R.QAQIEVVPSASALI.K.A        | RPL12     |
| 1539 | 2 | 2.651 | 0.196 | 16/20  | P26373_RL13_HUMAN  | 1  | K.STESLQANVQR.L             | RPL13     |
| 4906 | 2 | 2.646 | 0.234 | 13/14  | P62736_ACTA_HUMAN  | 9  | R.DLTDYLM*K.I               | ACTA2     |
| 4505 | 2 | 2.645 | 0.133 | 15/20  | P39019_RS19_HUMAN  | 4  | K.LKVPWVDTV.K.L             | RPS19     |
| 6399 | 2 | 2.639 | 0.353 | 13/18  | Q13885_TBB2A_HUMAN | 8  | R.ISEQFTAMFR.R              | TUBB2A    |
| 3546 | 2 | 2.634 | 0.332 | 12-Dec | Q9UNX3_RL26L_HUMAN | 8  | K.YVIYIER.V                 | RPL26L1   |
| 1908 | 2 | 2.633 | 0.217 | 16-Nov | P05186_PPBT_HUMAN  | 0  | K.SVGIVTTR.V                | ALPL      |
| 2042 | 2 | 2.633 | 0.266 | 15/20  | P62736_ACTA_HUMAN  | 6  | K.EITALAPSTM*K.I            | ACTA2     |
| 2629 | 2 | 2.629 | 0.157 | 15/18  | P62807_H2B1C_HUMAN | 9  | R.KESYSVYYK.V               | HIST1H2BC |
| 7821 | 2 | 2.627 | 0.192 | 16/28  | P68400_CSK21_HUMAN | 5  | K.YSEVFEAINITNNEK.V         | CSNK2A1   |
| 3664 | 2 | 2.622 | 0.359 | 16-Dec | Q7L2E3_DHX30_HUMAN | 1  | R.EYLTTLGQR.L               | DHX30     |
| 4263 | 2 | 2.618 | 0.316 | 15/18  | P62805_H4_HUMAN    | 0  | R.ISGLIYEETR.G              | HIST1H4A  |
| 1394 | 2 | 2.618 | 0.192 | 15/18  | P35659_DEK_HUMAN   | 1  | R.LTM*QVSSLQR.E             | DEK       |
| 660  | 2 | 2.616 | 0.15  | 16/20  | P62736_ACTA_HUMAN  | 22 | R.HQGVMVGM*GQK.D            | ACTA2     |
| 5378 | 2 | 2.613 | 0.051 | 24-Dec | Q9NUL3_STAU2_HUMAN | 12 | K.NAAEAMLLQLGYK.A           | STAU2     |
| 6246 | 2 | 2.607 | 0.218 | 22/34  | P46778_RL21_HUMAN  | 0  | R.TNGKEPELLEPIPEYFM*A.-     | RPL21     |
| 315  | 2 | 2.603 | 0.289 | 13/14  | P30050_RL12_HUMAN  | 0  | K.KVGGDDIAK.A               | RPL12     |
| 2506 | 2 | 2.602 | 0.364 | 14/16  | P62987_RL40_HUMAN  | 20 | R.TLSDYNIQK.E               | UBA52     |
| 2922 | 2 | 2.601 | 0.184 | 12-Nov | Q16695_H31T_HUMAN  | 10 | K.STELLIR.K                 | HIST3H3   |
| 4436 | 2 | 2.6   | 0.323 | 12-Nov | P35580_MYH10_HUMAN | 1  | K.ADEWLMK.N                 | MYH10     |
| 2062 | 2 | 2.593 | 0.234 | 14/18  | P35659_DEK_HUMAN   | 1  | R.LTM*QVSSLQR.E             | DEK       |
| 4204 | 2 | 2.588 | 0.307 | 14/20  | P07355_ANXA2_HUMAN | 1  | K.SLYYYIQDQTK.G             | ANXA2     |
| 3342 | 2 | 2.588 | 0.311 | 16-Nov | Q99417_MYCBP_HUMAN | 1  | K.SGVLDLTLK.V               | MYCBP     |
| 2188 | 2 | 2.587 | 0.267 | 13/16  | P12268_IMDH2_HUMAN | 1  | R.YFSEADKIK.V               | IMPDH2    |
| 6332 | 2 | 2.585 | 0.271 | 14/22  | Q96QU1_PCD15_HUMAN | 21 | R.NGTILVDM*LIK.G            | PCDH15    |
| 3970 | 2 | 2.585 | 0.204 | 28-Nov | P35579_MYH9_HUMAN  | 0  | K.IAQLEEQLDNETKER.Q         | MYH9      |
| 1181 | 2 | 2.583 | 0.198 | 15/24  | Q96QR8_PURB_HUMAN  | 0  | R.GGGEQETQELASK.R           | PURB      |
| 6527 | 2 | 2.583 | 0.425 | 17/28  | P46087_NOP2_HUMAN  | 1  | R.LVPTGLDFGQEGFTR.F         | NOP2      |
| 2826 | 2 | 2.58  | 0.506 | 14/20  | P62277_RS13_HUMAN  | 0  | K.YESSTASALVA.-             | RPS13     |
| 7290 | 2 | 2.577 | 0.381 | 22-Dec | P35659_DEK_HUMAN   | 3  | K.NVGQFSGFPFEK.G            | DEK       |
| 2474 | 2 | 2.571 | 0.266 | 14-Dec | P67870_CSK2B_HUMAN | 3  | R.GIAQM*LEK.Y               | CSNK2B    |
| 4052 | 2 | 2.567 | 0.137 | 17/24  | KV2A7_MOUSE        | 14 | R.FSGSGSGTDFTLK.I           |           |
| 5680 | 2 | 2.567 | 0.33  | 16/20  | P34931_HS71L_HUMAN | 2  | K.NALESYAFNMK.S             | HSPA1L    |
| 1023 | 2 | 2.563 | 0.276 | 15/22  | P50402_EMD_HUMAN   | 1  | R.TYGPESAGPSR.A             | EMD       |
| 1210 | 2 | 2.56  | 0.285 | 14/16  | P11021_GRP78_HUMAN | 0  | K.ITITNDQNR.L               | HSPA5     |
| 7724 | 2 | 2.556 | 0.425 | 16/36  | SAV_STRAV          | 0  | R.NAHSATTWSGQYVGGAEAR.I     |           |
| 2558 | 2 | 2.551 | 0.217 | 12-Dec | Q96QV6_H2A1A_HUMAN | 16 | R.HLQLAIR.N                 | HIST1H2AA |
| 778  | 2 | 2.551 | 0.241 | 16-Dec | P35659_DEK_HUMAN   | 2  | K.KPPTDEELK.E               | DEK       |
| 789  | 2 | 2.549 | 0.344 | 16-Dec | P34931_HS71L_HUMAN | 10 | K.ITITNDKGR.L               | HSPA1L    |
| 4646 | 2 | 2.546 | 0.35  | 13/18  | P13010_XRCC5_HUMAN | 0  | R.YGSDIVPFSK.V              | XRCC5     |

|      |   |       |       |        |                    |    |                           |           |
|------|---|-------|-------|--------|--------------------|----|---------------------------|-----------|
| 5774 | 2 | 2.545 | 0.522 | 18/22  | P62805_H4_HUMAN    | 0  | K.TVTAMDVVYALK.R          | HIST1H4A  |
| 8055 | 2 | 2.541 | 0.174 | 22-Dec | Q8NHW5_RLAOL_HUMAN | 6  | K.TSFFQALGITTK.I          | RPLPOP6   |
| 5394 | 2 | 2.539 | 0.352 | 20/28  | P19784_CSK22_HUMAN | 2  | R.EPFFHGGQDNDYDQLVR.I     | CSNK2A2   |
| 3151 | 2 | 2.538 | 0.301 | 12-Nov | Q96QV6_H2A1A_HUMAN | 16 | R.HLQLAIR.N               | HIST1H2AA |
| 5136 | 2 | 2.538 | 0.182 | 13/18  | P52272_HNRPM_HUMAN | 2  | R.INEILSNALK.R            | HNRNPM    |
| 2917 | 2 | 2.533 | 0.187 | 16-Dec | Q15233_NONO_HUMAN  | 3  | K.VELDNM*PLR.G            | NONO      |
| 4938 | 2 | 2.533 | 0.152 | 12-Nov | P35659_DEK_HUMAN   | 3  | R.IHFFLSK.K               | DEK       |
| 3514 | 2 | 2.53  | 0.371 | 16/20  | P11142_HSP7C_HUMAN | 9  | R.FDDAVVQSDMK.H           | HSPA8     |
| 5993 | 2 | 2.527 | 0.292 | 14/16  | P35579_MYH9_HUMAN  | 0  | R.GDLPFVVR.R              | MYH9      |
| 5711 | 2 | 2.527 | 0.08  | 24-Dec | P68400_CSK21_HUMAN | 4  | R.EAM*EHPYFYTVVK.D        | CSNK2A1   |
| 3288 | 2 | 2.525 | 0.17  | 20-Dec | P62805_H4_HUMAN    | 0  | K.RISGLIYEETR.G           | HIST1H4A  |
| 7960 | 2 | 2.523 | 0.177 | 12-Nov | P35659_DEK_HUMAN   | 3  | R.IHFFLSK.K               | DEK       |
| 1086 | 2 | 2.522 | 0.27  | 13/16  | P11021_GRP78_HUMAN | 0  | K.VLEDSLK.K.S             | HSPA5     |
| 4923 | 2 | 2.52  | 0.342 | 17/32  | P12956_XRCC6_HUMAN | 1  | R.TFNTSTGGLLLPSDTKR.S     | XRCC6     |
| 948  | 2 | 2.52  | 0.108 | 18-Dec | P35659_DEK_HUMAN   | 3  | R.SGVNSELVKR.I            | DEK       |
| 6288 | 2 | 2.519 | 0.299 | 14/16  | P08107_HSP71_HUMAN | 1  | K.LLQDFFNGR.D             | HSPA1A    |
| 6390 | 2 | 2.514 | 0.361 | 14/36  | P27694_RFA1_HUMAN  | 1  | R.GWFDAEGQALDGVSSIDLK.S   | RPA1      |
| 4670 | 2 | 2.506 | 0.355 | 14/22  | P62805_H4_HUMAN    | 0  | K.TVTAM*DVVYALK.R         | HIST1H4A  |
| 3003 | 2 | 2.505 | 0.262 | 14-Nov | P39019_RS19_HUMAN  | 4  | R.ALAFLK.K.S              | RPS19     |
| 4518 | 2 | 2.503 | 0.27  | 15/16  | Q15233_NONO_HUMAN  | 3  | K.VELDNMPLR.G             | NONO      |
| 3722 | 2 | 2.503 | 0.3   | 15/18  | P39019_RS19_HUMAN  | 1  | R.RVLQALEGLK.M            | RPS19     |
| 8058 | 2 | 2.502 | 0.12  | 12-Nov | P35659_DEK_HUMAN   | 3  | R.IHFFLSK.K               | DEK       |
| 8560 | 2 | 2.495 | 0.349 | 30-Oct | P05386_RLA1_HUMAN  | 0  | K.AAGVNVPEFWPGLFAK.A      | RPLP1     |
| 1076 | 2 | 2.493 | 0.203 | 16-Nov | P62269_RS18_HUMAN  | 0  | R.KADIDLTR.A              | RPS18     |
| 6846 | 2 | 2.49  | 0.307 | 13/26  | P04406_G3P_HUMAN   | 1  | K.LISWYDNEFGYSNR.V        | GAPDH     |
| 2752 | 2 | 2.49  | 0.367 | 13/16  | P19105_ML12A_HUMAN | 3  | R.ELLTTMGDR.F             | MYL12A    |
| 922  | 2 | 2.49  | 0.249 | 13/14  | P06748_NPM_HUMAN   | 0  | K.ADKDYHF.K.V             | NPM1      |
| 809  | 2 | 2.49  | 0.145 | 14-Oct | Q9UNX3_RL26L_HUMAN | 9  | K.IM*SSPLSK.E             | RPL26L1   |
| 2426 | 2 | 2.484 | 0.132 | 14-Dec | P35579_MYH9_HUMAN  | 0  | K.DLEGLSQR.H              | MYH9      |
| 5837 | 2 | 2.482 | 0.293 | 14/24  | P68400_CSK21_HUMAN | 2  | K.VLGTEDLYDYDK.Y          | CSNK2A1   |
| 1174 | 2 | 2.481 | 0.273 | 14-Nov | P46777_RL5_HUMAN   | 0  | K.EFNAEVHR.K              | RPL5      |
| 1002 | 2 | 2.481 | 0.256 | 20-Dec | P68400_CSK21_HUMAN | 5  | R.VYTDVNTHRPR.E           | CSNK2A1   |
| 2071 | 2 | 2.48  | 0.208 | 16-Dec | P35579_MYH9_HUMAN  | 0  | R.EQEVNLIK.K.T            | MYH9      |
| 3272 | 2 | 2.476 | 0.357 | 13/16  | P30050_RL12_HUMAN  | 0  | K.IGPLGLSPK.K             | RPL12     |
| 3714 | 2 | 2.471 | 0.274 | 14/16  | Q9UNX3_RL26L_HUMAN | 9  | K.FNPFVTSR.S              | RPL26L1   |
| 5116 | 2 | 2.469 | 0.167 | 16/24  | P26373_RL13_HUMAN  | 0  | K.LATQLTGPVMPVR.N         | RPL13     |
| 4490 | 2 | 2.467 | 0.231 | 14-Dec | P67870_CSK2B_HUMAN | 3  | R.GIAQMLEK.Y              | CSNK2B    |
| 4736 | 2 | 2.466 | 0.297 | 15/18  | Q13885_TBB2A_HUMAN | 8  | R.ISEQFTAM*FR.R           | TUBB2A    |
| 4572 | 2 | 2.466 | 0.285 | 13/16  | P62913_RL11_HUMAN  | 0  | K.YDGIILPGK.-             | RPL11     |
| 5202 | 2 | 2.464 | 0.291 | 18-Dec | P35579_MYH9_HUMAN  | 0  | R.RGDLPFVVR.R             | MYH9      |
| 5625 | 2 | 2.464 | 0.055 | 21/24  | P35659_DEK_HUMAN   | 3  | K.KNVGQFSGFPFEK.G         | DEK       |
| 1075 | 2 | 2.463 | 0.185 | 18-Dec | P62280_RS11_HUMAN  | 2  | R.VLLGETGKEK.L            | RPS11     |
| 967  | 2 | 2.46  | 0.251 | 16-Nov | P35659_DEK_HUMAN   | 2  | K.KPPTDEELK.E             | DEK       |
| 1358 | 2 | 2.458 | 0.345 | 14/16  | P10809_CH60_HUMAN  | 0  | R.VTDALNATR.A             | HSPD1     |
| 5581 | 2 | 2.457 | 0.358 | 24-Dec | P35659_DEK_HUMAN   | 2  | K.LLASANLEEVMTK.Q         | DEK       |
| 2378 | 2 | 2.455 | 0.266 | 14-Dec | P67870_CSK2B_HUMAN | 3  | R.GIAQM*LEK.Y             | CSNK2B    |
| 2282 | 2 | 2.455 | 0.179 | 13/18  | P62280_RS11_HUMAN  | 1  | K.EAIEGTIDK.K             | RPS11     |
| 1128 | 2 | 2.454 | 0.255 | 15/18  | P62736_ACTA_HUMAN  | 27 | K.AGFAGDDAPR.A            | ACTA2     |
| 8622 | 2 | 2.454 | 0.243 | 15/32  | P05388_RLA0_HUMAN  | 4  | R.VLALSVETDYTEFPLAEK.V    | RPLP0     |
| 6004 | 2 | 2.451 | 0.337 | 15/28  | P38646_GRP75_HUMAN | 0  | K.NAVITVPAYFNDSQR.Q       | HSPA9     |
| 3047 | 2 | 2.447 | 0.467 | 16-Oct | P62807_H2B1C_HUMAN | 9  | K.ESYSYVYK.V              | HIST1H2BC |
| 2226 | 2 | 2.447 | 0.319 | 14/18  | P02545_LMNA_HUMAN  | 3  | K.EGDLIAAQR.L             | LMNA      |
| 7709 | 2 | 2.446 | 0.502 | 17/24  | P35659_DEK_HUMAN   | 2  | K.LLASANLEEVMTK.Q         | DEK       |
| 5438 | 2 | 2.445 | 0.082 | 13/16  | P62318_SMD3_HUMAN  | 0  | R.FLILPDM*LK.N            | SNRPD3    |
| 2643 | 2 | 2.444 | 0.236 | 14/16  | P62750_RL23A_HUMAN | 5  | K.KLYDIDVAK.V             | RPL23A    |
| 6037 | 2 | 2.443 | 0.065 | 14/18  | P35659_DEK_HUMAN   | 1  | R.LTM*QVSSLQR.E           | DEK       |
| 218  | 2 | 2.44  | 0.31  | 20-Nov | P39019_RS19_HUMAN  | 1  | R.IAGQVAANKK.H            | RPS19     |
| 1395 | 2 | 2.438 | 0.148 | 13/16  | P67870_CSK2B_HUMAN | 1  | K.RPANQVPR.L              | CSNK2B    |
| 995  | 2 | 2.434 | 0.053 | 16-Nov | P35659_DEK_HUMAN   | 3  | R.SGVNSELVKR.R            | DEK       |
| 564  | 2 | 2.432 | 0.201 | 14-Nov | P52272_HNRPM_HUMAN | 5  | R.M*GANSLER.M             | HNRNPM    |
| 5712 | 2 | 2.429 | 0.285 | 15/22  | P10809_CH60_HUMAN  | 1  | R.GYISPYFINTSK.G          | HSPD1     |
| 6866 | 2 | 2.422 | 0.088 | 14/38  | P07477_TRY1_HUMAN  | 10 | R.LGEHNIEVLEGNEQFINAAK.I  | PRSS1     |
| 613  | 2 | 2.417 | 0.092 | 12-Nov | P52272_HNRPM_HUMAN | 3  | R.VGQTIER.M               | HNRNPM    |
| 2175 | 2 | 2.417 | 0.23  | 16-Dec | P12268_IMDH2_HUMAN | 1  | R.YFSEADKIK.V             | IMPDH2    |
| 7982 | 2 | 2.415 | 0.084 | 14/28  | Q7L2E3_DHX30_HUMAN | 1  | K.GVLMAGLYPNLIQVR.Q       | DHX30     |
| 6758 | 2 | 2.414 | 0.323 | 15/22  | P36578_RL4_HUMAN   | 1  | R.NIPGITLLNVSK.L          | RPL4      |
| 4786 | 2 | 2.413 | 0.179 | 15/36  | P62841_RS15_HUMAN  | 7  | R.DM*ILPEM*VGS*GVYNGK.T   | RPS15     |
| 1562 | 2 | 2.412 | 0.222 | 13/16  | P35579_MYH9_HUMAN  | 0  | K.VAAYDKLEK.T             | MYH9      |
| 2926 | 2 | 2.411 | 0.271 | 12-Nov | P35580_MYH10_HUMAN | 1  | K.ADEWLM*K.N              | MYH10     |
| 4809 | 2 | 2.411 | 0.267 | 15/16  | P62269_RS18_HUMAN  | 0  | K.IAFAITAIK.G             | RPS18     |
| 3070 | 2 | 2.409 | 0.267 | 12-Oct | P68400_CSK21_HUMAN | 4  | R.FNDILGR.H               | CSNK2A1   |
| 357  | 2 | 2.409 | 0.173 | 12-Dec | P35659_DEK_HUMAN   | 3  | K.KKTDLR.N                | DEK       |
| 3529 | 2 | 2.408 | 0.393 | 16-Nov | P33778_H2B1B_HUMAN | 6  | K.ESYSYVYK.V              | HIST1H2BB |
| 2518 | 2 | 2.407 | 0.074 | 17/22  | P62269_RS18_HUMAN  | 1  | K.YSQVLANGLDNK.L          | RPS18     |
| 7202 | 2 | 2.405 | 0.471 | 13/40  | SAV1_STRVL         | 2  | R.YDSAPATDGGGTALGWTVAWK.N |           |
| 1829 | 2 | 2.404 | 0.424 | 24-Sep | Q04837_SBP_HUMAN   | 1  | K.IDYGEYM*DKNNVR.R        | SSBP1     |
| 5762 | 2 | 2.402 | 0.24  | 14/18  | P35659_DEK_HUMAN   | 1  | R.LTMQVSSLQR.E            | DEK       |
| 4260 | 2 | 2.397 | 0.337 | 13/20  | P62424_RL7A_HUMAN  | 1  | K.NFGIGQDIQPK.R           | RPL7A     |
| 5072 | 2 | 2.395 | 0.244 | 20-Nov | Q9BYX7_ACTBM_HUMAN | 19 | K.IWHHTFYNELR.V           | POTEKP    |

|      |   |       |       |        |                    |    |                          |           |
|------|---|-------|-------|--------|--------------------|----|--------------------------|-----------|
| 4469 | 2 | 2.392 | 0.249 | 28-Nov | Q13885_TBB2A_HUMAN | 9  | R.AILVDLEPGTM*DSVR.S     | TUBB2A    |
| 5034 | 2 | 2.392 | 0.15  | 12-Nov | P35659_DEK_HUMAN   | 3  | R.IHFFLSK.K              | DEK       |
| 6514 | 2 | 2.39  | 0.071 | 28-Nov | P68400_CSK21_HUMAN | 5  | K.YSEVFEAINITNNEK.V      | CSNK2A1   |
| 3660 | 2 | 2.39  | 0.269 | 18-Dec | Q9UHB9_SRP68_HUMAN | 0  | R.DYILEGEPGK.V           | SRP68     |
| 4586 | 2 | 2.389 | 0.254 | 14-Dec | P67870_CSK2B_HUMAN | 3  | R.GIAQMLEK.Y             | CSNK2B    |
| 3146 | 2 | 2.388 | 0.493 | 16-Oct | P62807_H2B1C_HUMAN | 9  | K.ESYSVYVYK.V            | HIST1H2BC |
| 4136 | 2 | 2.383 | 0.166 | 12-Oct | P68400_CSK21_HUMAN | 4  | R.FNDILGR.H              | CSNK2A1   |
| 1582 | 2 | 2.382 | 0.116 | 13/16  | P35579_MYH9_HUMAN  | 0  | K.LQEMEGTVK.S            | MYH9      |
| 452  | 2 | 2.382 | 0.058 | 12-Nov | P35659_DEK_HUMAN   | 3  | K.KKTDEL.R.N             | DEK       |
| 3072 | 2 | 2.382 | 0.22  | 15/22  | IGH1M_MOUSE        | 0  | R.VNSAAFPAPIEK.T         | Ighg1     |
| 4163 | 2 | 2.38  | 0.281 | 16/18  | P19338_NUCL_HUMAN  | 1  | K.EVFEDAAEIR.L           | NCL       |
| 1046 | 2 | 2.377 | 0.137 | 13/14  | P62888_RL30_HUMAN  | 3  | K.SLESINSR.L             | RPL30     |
| 5577 | 2 | 2.375 | 0.05  | 13/24  | Q9NUL3_STAU2_HUMAN | 12 | K.NAAEAMLLQLGYK.A        | STAU2     |
| 1343 | 2 | 2.37  | 0.28  | 14/18  | P52272_HNRPM_HUMAN | 6  | R.ADILEDKDGK.S           | HNRNPM    |
| 4483 | 2 | 2.366 | 0.078 | 14/18  | P35659_DEK_HUMAN   | 1  | R.LTM*QVSSLQR.E          | DEK       |
| 4179 | 2 | 2.365 | 0.117 | 15/22  | P62888_RL30_HUMAN  | 2  | K.LVILANNCP#PALR.K       | RPL30     |
| 917  | 2 | 2.364 | 0.22  | 20-Dec | Q7L2E3_DHX30_HUMAN | 1  | R.LQEALGM*HESK.Y         | DHX30     |
| 6256 | 2 | 2.361 | 0.116 | 16/30  | P62736_ACTA_HUMAN  | 9  | K.SYELPDGQVITIGNER.F     | ACTA2     |
| 6295 | 2 | 2.358 | 0.213 | 14/22  | Q15393_SF3B3_HUMAN | 0  | R.FLAVGLVDNTVR.I         | SF3B3     |
| 343  | 2 | 2.351 | 0.084 | 13/18  | P26373_RL13_HUMAN  | 0  | K.KGDSSAEELK.L           | RPL13     |
| 6969 | 2 | 2.348 | 0.308 | 16/24  | P68400_CSK21_HUMAN | 2  | K.VLGTEDLYDYDK.Y         | CSNK2A1   |
| 2045 | 2 | 2.346 | 0.18  | 14/16  | P35659_DEK_HUMAN   | 3  | R.SGVNSELVK.R            | DEK       |
| 5568 | 2 | 2.346 | 0.116 | 15/18  | P35659_DEK_HUMAN   | 1  | R.LTMQVSSLQR.E           | DEK       |
| 3952 | 2 | 2.345 | 0.175 | 15/18  | Q71U36_TBA1A_HUMAN | 5  | K.DVNAAIATIK.T           | TUBA1A    |
| 3370 | 2 | 2.345 | 0.358 | 13/16  | P30050_RL12_HUMAN  | 0  | K.IGPLGLSPK.K            | RPL12     |
| 1565 | 2 | 2.341 | 0.201 | 18-Dec | P12268_IMDH2_HUMAN | 1  | R.GMGSLDAM*DK.H          | IMPDH2    |
| 356  | 2 | 2.34  | 0.309 | 12-Nov | P33778_H2B1B_HUMAN | 15 | R.LAHYNKR.S              | HIST1H2BB |
| 981  | 2 | 2.337 | 0.133 | 13/14  | P11142_HSP7C_HUMAN | 5  | R.LSKEDIER.M             | HSPA8     |
| 4375 | 2 | 2.336 | 0.058 | 13/28  | P35030_TRY3_HUMAN  | 0  | K.C#GKGLAAARPGRVER.G     | PRSS3     |
| 3872 | 2 | 2.334 | 0.204 | 16-Nov | P07355_ANXA2_HUMAN | 13 | R.QDIAFAYQR.R            | ANXA2     |
| 3520 | 2 | 2.329 | 0.074 | 18-Nov | Q9UHB9_SRP68_HUMAN | 0  | R.KTLNFKMGNR.H           | SRP68     |
| 3852 | 2 | 2.325 | 0.185 | 13/28  | P11021_GRP78_HUMAN | 0  | K.TKPYIQVDIGGGQTK.T      | HSPA5     |
| 1001 | 2 | 2.324 | 0.081 | 14-Dec | P62736_ACTA_HUMAN  | 7  | K.IIAPPERK.Y             | ACTA2     |
| 4355 | 2 | 2.324 | 0.054 | 17/20  | P20671_H2A1D_HUMAN | 7  | R.NDEELNKLKLGK.V         | HIST1H2AD |
| 1944 | 2 | 2.317 | 0.33  | 16-Dec | P62987_RL40_HUMAN  | 20 | R.TLSDYNIQK.E            | UBA52     |
| 1480 | 2 | 2.316 | 0.105 | 14/18  | P35659_DEK_HUMAN   | 3  | R.SGVNSELVKR.I           | DEK       |
| 4373 | 2 | 2.316 | 0.228 | 15/18  | P35579_MYH9_HUMAN  | 0  | K.DVLLQVDDER.R           | MYH9      |
| 8035 | 2 | 2.308 | 0.34  | 16/30  | P35749_MYH11_HUMAN | 4  | K.QLLQANPILEAFGNAK.T     | MYH11     |
| 2275 | 2 | 2.306 | 0.167 | 14-Dec | P67870_CSK2B_HUMAN | 3  | R.GIAQM*LEK.Y            | CSNK2B    |
| 300  | 2 | 2.305 | 0.257 | 14-Dec | P39023_RL3_HUMAN   | 3  | K.AGM*THIVR.E            | RPL3      |
| 1904 | 2 | 2.302 | 0.071 | 14-Dec | P20839_IMDH1_HUMAN | 5  | K.EANEILQR.S             | IMPDH1    |
| 1629 | 2 | 2.301 | 0.12  | 14-Nov | P46778_RL21_HUMAN  | 2  | K.KGDIVDIK.G             | RPL21     |
| 5747 | 2 | 2.301 | 0.173 | 13/14  | P26373_RL13_HUMAN  | 1  | R.GFSLLELR.V             | RPL13     |
| 2823 | 2 | 2.295 | 0.086 | 12-Nov | Q16695_H31T_HUMAN  | 10 | K.STELLIR.K              | HIST3H3   |
| 1669 | 2 | 2.294 | 0.057 | 14/18  | P35659_DEK_HUMAN   | 3  | R.SGVNSELVKR.I           | DEK       |
| 5096 | 2 | 2.29  | 0.461 | 16/28  | P68400_CSK21_HUMAN | 2  | K.EPFFHGHNDYDQLVR.I      | CSNK2A1   |
| 6191 | 2 | 2.286 | 0.238 | 16-Dec | Q00577_PURA_HUMAN  | 0  | R.FFFDVGSNK.Y            | PURA      |
| 6418 | 2 | 2.285 | 0.305 | 14/32  | Q9BQ67_GRWD1_HUMAN | 0  | R.EGEEELVM*DEEAYVLYHR.A  | GRWD1     |
| 9250 | 2 | 2.284 | 0.201 | Nov-34 | SAV1_STRVL         | 1  | R.INTQWLLTSGTTEANAWK.S   |           |
| 5709 | 2 | 2.28  | 0.195 | 14-Dec | P07355_ANXA2_HUMAN | 8  | K.WISIMTER.S             | ANXA2     |
| 7869 | 2 | 2.278 | 0.122 | 12-Nov | P35659_DEK_HUMAN   | 3  | R.IHFFLSK.K              | DEK       |
| 7156 | 2 | 2.275 | 0.303 | 24-Sep | P35659_DEK_HUMAN   | 2  | K.LLASANLEEVMTM.K.Q      | DEK       |
| 1722 | 2 | 2.274 | 0.141 | 16-Nov | Q16695_H31T_HUMAN  | 10 | R.YRPGTVALR.E            | HIST3H3   |
| 3043 | 2 | 2.274 | 0.359 | 16-Nov | Q04837_SBP_HUMAN   | 1  | K.IDYGEYMDK.N            | SSBP1     |
| 4777 | 2 | 2.272 | 0.058 | 14/28  | Q86YV6_MYLK4_HUMAN | 0  | K.VKCFLEKNSGDQDSR.S      | MYLK4     |
| 4834 | 2 | 2.271 | 0.154 | 18-Oct | P36578_RL4_HUMAN   | 1  | R.KLDELYGTWR.K           | RPL4      |
| 5226 | 2 | 2.27  | 0.168 | 12-Nov | P35659_DEK_HUMAN   | 3  | R.IHFFLSK.K              | DEK       |
| 3242 | 2 | 2.268 | 0.333 | 16-Oct | P35659_DEK_HUMAN   | 2  | R.EPFTIAQGGK.G           | DEK       |
| 1848 | 2 | 2.267 | 0.051 | 14-Sep | P11021_GRP78_HUMAN | 0  | K.VLESDLK.K              | HSPA5     |
| 5503 | 2 | 2.265 | 0.227 | 13/22  | Q12965_MYO1E_HUMAN | 0  | K.VLQVSIGPLPK.N          | MYO1E     |
| 5894 | 2 | 2.265 | 0.187 | 14/28  | P68400_CSK21_HUMAN | 5  | K.YSEVFEAINITNNEK.V      | CSNK2A1   |
| 2934 | 2 | 2.265 | 0.33  | 18-Dec | P62424_RL7A_HUMAN  | 1  | R.HWGGNVLGPK.S           | RPL7A     |
| 6140 | 2 | 2.257 | 0.265 | 15/18  | Q7L2E3_DHX30_HUMAN | 1  | R.AVAGWEEVLR.W           | DHX30     |
| 1353 | 2 | 2.253 | 0.153 | 14-Nov | Q04837_SBP_HUMAN   | 2  | R.VGQDPVLR.Q             | SSBP1     |
| 1050 | 2 | 2.25  | 0.198 | 14-Dec | P35659_DEK_HUMAN   | 2  | K.SLIVEGKR.E             | DEK       |
| 3320 | 2 | 2.25  | 0.194 | 12-Oct | P62277_RS13_HUMAN  | 0  | R.LILIESR.I              | RPS13     |
| 2974 | 2 | 2.248 | 0.143 | 18-Nov | Q9NW13_RBM28_HUMAN | 0  | K.LLLSATSGEK.G           | RBM28     |
| 4167 | 2 | 2.248 | 0.198 | 13/20  | P62424_RL7A_HUMAN  | 1  | K.NFGIGQDIQPK.R          | RPL7A     |
| 5130 | 2 | 2.248 | 0.165 | 12-Nov | P35659_DEK_HUMAN   | 3  | R.IHFFLSK.K              | DEK       |
| 3240 | 2 | 2.247 | 0.052 | 18-Nov | Q15208_STK38_HUMAN | 0  | R.IGAPGVVEIK.S           | STK38     |
| 8261 | 2 | 2.245 | 0.146 | 28-Dec | P68400_CSK21_HUMAN | 3  | R.TPALVFEHVNNTDFK.Q      | CSNK2A1   |
| 951  | 2 | 2.243 | 0.173 | 14/18  | P62829_RL23_HUMAN  | 1  | K.GSAITGPVAK.E           | RPL23     |
| 8608 | 2 | 2.243 | 0.103 | Dec-40 | P60709_ACTB_HUMAN  | 1  | K.DLYANTVLSGGTTPYGIADR.M | ACTB      |
| 4246 | 2 | 2.241 | 0.053 | 16/20  | Q9NR30_DDX21_HUMAN | 0  | K.STYEQVDLIGK.K          | DDX21     |
| 611  | 2 | 2.239 | 0.157 | 14-Nov | P35579_MYH9_HUMAN  | 0  | R.VRTELADK.V             | MYH9      |
| 1273 | 2 | 2.237 | 0.064 | 12-Oct | P62913_RL11_HUMAN  | 2  | K.AEEILEK.G              | RPL11     |
| 462  | 2 | 2.236 | 0.202 | 14-Dec | P52272_HNRPM_HUMAN | 3  | R.M*GANNLER.M            | HNRNPM    |
| 275  | 2 | 2.235 | 0.08  | 13/18  | P26373_RL13_HUMAN  | 0  | K.KGDSSAEELK.L           | RPL13     |

|      |   |       |       |        |                     |    |                           |           |
|------|---|-------|-------|--------|---------------------|----|---------------------------|-----------|
| 325  | 2 | 2.232 | 0.241 | 20-Dec | P62750_RL23A_HUMAN  | 0  | K.EAPAPPKAEAK.A           | RPL23A    |
| 5732 | 2 | 2.228 | 0.218 | 20-Nov | D6RDA2_D6RDA2_HUMAN | 0  | R.ILNFLM*HPKPS.-          | DEK       |
| 920  | 2 | 2.228 | 0.369 | 18-Dec | Q9NW13_RBM28_HUMAN  | 0  | K.QQLSSEQVSR.K            | RBM28     |
| 3625 | 2 | 2.226 | 0.447 | 16/26  | P35579_MYH9_HUMAN   | 0  | R.IAEFTTNLTTEEEK.S        | MYH9      |
| 6404 | 2 | 2.225 | 0.184 | 24-Nov | P35659_DEK_HUMAN    | 2  | K.LLASANLEEVMTK.Q         | DEK       |
| 2646 | 2 | 2.225 | 0.059 | 12-Sep | Q8NHW5_RLA0L_HUMAN  | 11 | K.EDLTEIR.D               | RPLP0P6   |
| 5250 | 2 | 2.224 | 0.18  | 13/16  | Q9BQ67_GRWD1_HUMAN  | 1  | K.GQVEVFALR.R             | GRWD1     |
| 946  | 2 | 2.224 | 0.248 | 14-Oct | Q9H4B7_TBB1_HUMAN   | 11 | K.IREEYPDR.I              | TUBB1     |
| 590  | 2 | 2.216 | 0.152 | 13/20  | Q92522_H1X_HUMAN    | 0  | K.AGGSAAALSPSK.K          | H1FX      |
| 5810 | 2 | 2.216 | 0.201 | 14-Dec | Q08945_SSRP1_HUMAN  | 0  | K.IELDFVNAK.K             | SSRP1     |
| 142  | 2 | 2.211 | 0.145 | 14-Dec | P35579_MYH9_HUMAN   | 2  | K.VNKDDIQK.M              | MYH9      |
| 4267 | 2 | 2.21  | 0.272 | 14-Sep | Q08945_SSRP1_HUMAN  | 2  | K.IPYTTVLR.L              | SSRP1     |
| 6312 | 2 | 2.208 | 0.192 | 13/22  | P35659_DEK_HUMAN    | 3  | K.NVGQFSGFPFEK.G          | DEK       |
| 4474 | 2 | 2.208 | 0.151 | 12-Nov | P35579_MYH9_HUMAN   | 0  | R.VVFQEFR.Q               | MYH9      |
| 5347 | 2 | 2.208 | 0.159 | 12-Oct | P35659_DEK_HUMAN    | 3  | R.IHFFLSK.K               | DEK       |
| 1108 | 2 | 2.208 | 0.306 | 16-Nov | P06748_NPM_HUMAN    | 0  | K.GPSSVEDIK.A             | NPM1      |
| 908  | 2 | 2.205 | 0.154 | 13/14  | P34931_HS71L_HUMAN  | 2  | R.LSKEEIER.M              | HSPA1L    |
| 1502 | 2 | 2.202 | 0.184 | 26-Nov | P13010_XRCC5_HUMAN  | 0  | K.EEASGSSVTAEAK.K         | XRCC5     |
| 3659 | 2 | 2.2   | 0.097 | 14/18  | Q9UHB9_SRP68_HUMAN  | 0  | R.DYILEGEPGK.V            | SRP68     |
| 458  | 2 | 2.2   | 0.23  | 16-Nov | P62888_RL30_HUMAN   | 3  | K.KSLESINSR.L             | RPL30     |
| 1207 | 2 | 2.196 | 0.265 | 13/16  | P08107_HSP71_HUMAN  | 1  | K.SAVEDEGLK.G             | HSPA1A    |
| 3146 | 2 | 2.187 | 0.349 | 16-Oct | P35659_DEK_HUMAN    | 2  | R.EPFTIAQGK.G             | DEK       |
| 3740 | 2 | 2.18  | 0.217 | 18-Nov | P56537_IF6_HUMAN    | 1  | R.NSLPDTVQIR.R            | EIF6      |
| 1163 | 2 | 2.176 | 0.176 | 18-Nov | Q6P1J9_CDC73_HUMAN  | 0  | R.SLSEAM*SVEK.I           | CDC73     |
| 2864 | 2 | 2.175 | 0.142 | 14-Oct | P39023_RL3_HUMAN    | 2  | K.IGQGGLIK.D              | RPL3      |
| 7386 | 2 | 2.167 | 0.25  | 22-Nov | P35659_DEK_HUMAN    | 3  | K.NVGQFSGFPFEK.G          | DEK       |
| 7814 | 2 | 2.164 | 0.154 | 15/26  | P35579_MYH9_HUMAN   | 0  | K.VSHLLGINVDFTR.G         | MYH9      |
| 1065 | 2 | 2.164 | 0.181 | 18-Dec | P35579_MYH9_HUMAN   | 0  | R.EQLEEEEEAK.H            | MYH9      |
| 7983 | 2 | 2.157 | 0.171 | 28-Aug | P68400_CSK21_HUMAN  | 3  | R.TPALVFEHVNNTDFK.Q       | CSNK2A1   |
| 1390 | 2 | 2.154 | 0.078 | 16/18  | P35659_DEK_HUMAN    | 3  | R.SGVNSELVKR.I            | DEK       |
| 2742 | 2 | 2.154 | 0.134 | 12-Nov | Q96QV6_H2A1A_HUMAN  | 16 | R.HLQLAIR.N               | HIST1H2AA |
| 6644 | 2 | 2.152 | 0.292 | 13/24  | P20839_IMDH1_HUMAN  | 2  | R.IELVVAPAGVTLK.E         | IMPDH1    |
| 1271 | 2 | 2.15  | 0.206 | 13/14  | P35659_DEK_HUMAN    | 2  | K.SLIVEGKR.E              | DEK       |
| 7275 | 2 | 2.143 | 0.261 | 13/28  | Q7L2E3_DHX30_HUMAN  | 1  | K.GVLM*AGLYPNLIQVR.Q      | DXH30     |
| 1807 | 2 | 2.133 | 0.08  | 12-Sep | P33778_H2B1B_HUMAN  | 15 | R.LAHYNKR.S               | HIST1H2BB |
| 3871 | 2 | 2.132 | 0.145 | 15/24  | P35659_DEK_HUMAN    | 2  | K.LLASANLEEVMT*K.Q        | DEK       |
| 1483 | 2 | 2.128 | 0.143 | 18-Dec | P35659_DEK_HUMAN    | 3  | R.SGVNSELVKR.I            | DEK       |
| 2889 | 2 | 2.128 | 0.089 | 16-Nov | P35579_MYH9_HUMAN   | 0  | K.VKPLLQVSR.Q             | MYH9      |
| 492  | 2 | 2.12  | 0.188 | 22-Dec | P62841_RS15_HUMAN   | 7  | K.EAPPM*EKPEVVK.T         | RPS15     |
| 5286 | 2 | 2.117 | 0.35  | 14/20  | P38646_GRP75_HUMAN  | 0  | K.VQQTVDLFGFR.A           | HSPA9     |
| 4142 | 2 | 2.117 | 0.18  | 13/14  | P68400_CSK21_HUMAN  | 4  | R.FNDILGR.H               | CSNK2A1   |
| 2122 | 2 | 2.116 | 0.249 | 13-Oct | Q04837_SBP_HUMAN    | 2  | R.DVAYQYVK.K              | SSBP1     |
| 3276 | 2 | 2.114 | 0.092 | 14-Dec | P13010_XRCC5_HUMAN  | 2  | K.VITM*FVQR.Q             | XRCC5     |
| 1096 | 2 | 2.111 | 0.208 | 18-Oct | P62280_RS11_HUMAN   | 2  | R.VLLGETGKEK.L            | RPS11     |
| 280  | 2 | 2.111 | 0.242 | 16-Nov | Q02539_H11_HUMAN    | 5  | K.KTGASGSFK.L             | HIST1H1A  |
| 612  | 2 | 2.111 | 0.095 | 12-Nov | P52272_HNRPM_HUMAN  | 3  | R.VGQTIER.M               | HNRNPM    |
| 3614 | 2 | 2.11  | 0.326 | 14/20  | P13010_XRCC5_HUMAN  | 0  | R.LGGHGPSFPLK.G           | XRCC5     |
| 3701 | 2 | 2.11  | 0.093 | 13/18  | P62805_H4_HUMAN     | 0  | R.ISGLIYEETR.G            | HIST1H4A  |
| 3635 | 2 | 2.106 | 0.074 | 12-Nov | Q00839_HNRPU_HUMAN  | 0  | K.FIEIAR.K                | HNRNPU    |
| 3648 | 2 | 2.103 | 0.111 | 12-Nov | Q16695_H31T_HUMAN   | 10 | K.STELLIR.K               | HIST3H3   |
| 4041 | 2 | 2.102 | 0.102 | 12-Oct | P68400_CSK21_HUMAN  | 4  | R.FNDILGR.H               | CSNK2A1   |
| 9005 | 2 | 2.098 | 0.084 | Dec-34 | SAV1_STRVL          | 1  | R.INTQWLLTSGTTEANAWK.S    |           |
| 3030 | 2 | 2.093 | 0.286 | 14-Dec | P62750_RL23A_HUMAN  | 5  | K.LYDIDVAK.V              | RPL23A    |
| 3686 | 2 | 2.092 | 0.321 | 16-Oct | P39019_RS19_HUMAN   | 4  | K.VPEWVDTVK.L             | RPS19     |
| 4752 | 2 | 2.09  | 0.211 | 30-Jul | P68400_CSK21_HUMAN  | 2  | R.KEPFFHGHNDYDQLVR.I      | CSNK2A1   |
| 3318 | 2 | 2.087 | 0.361 | 13/20  | Q13610_PWP1_HUMAN   | 1  | R.NSSISGPFGR.S            | PWP1      |
| 2847 | 2 | 2.086 | 0.094 | 18-Dec | O76094_SRP72_HUMAN  | 0  | K.LTNAEGVEFK.L            | SRP72     |
| 4315 | 2 | 2.084 | 0.312 | 18-Oct | P19338_NUCL_HUMAN   | 1  | R.SISLYYTGEK.G            | NCL       |
| 2875 | 2 | 2.083 | 0.075 | 13/16  | P35659_DEK_HUMAN    | 3  | R.SGVNSELVKR              | DEK       |
| 5193 | 2 | 2.082 | 0.121 | 13/24  | P35659_DEK_HUMAN    | 2  | K.LLASANLEEVMTK.Q         | DEK       |
| 4931 | 2 | 2.081 | 0.186 | 12-Nov | P35659_DEK_HUMAN    | 3  | R.IHFFLSK.K               | DEK       |
| 454  | 2 | 2.08  | 0.098 | 14-Sep | P35749_MYH11_HUMAN  | 2  | R.QQQLTAM*K.V             | MYH11     |
| 7926 | 2 | 2.076 | 0.148 | 14/26  | P67870_CSK2B_HUMAN  | 4  | K.FNLTGLNEQVPHYR.Q        | CSNK2B    |
| 4372 | 2 | 2.075 | 0.116 | 13/18  | P62805_H4_HUMAN     | 0  | R.ISGLIYEETR.G            | HIST1H4A  |
| 1731 | 2 | 2.073 | 0.07  | 12-Oct | P18124_RL7_HUMAN    | 2  | K.ASINM*LR.I              | RPL7      |
| 882  | 2 | 2.066 | 0.079 | 12-Nov | Q99848_EBP2_HUMAN   | 1  | K.SDLQMOK.I               | EBNA1BP2  |
| 4032 | 2 | 2.063 | 0.122 | 20-Dec | P18124_RL7_HUMAN    | 1  | R.IALTDNALIAR.S           | RPL7      |
| 3349 | 2 | 2.055 | 0.17  | 12-Oct | P62280_RS11_HUMAN   | 2  | R.DYLHYIR.K               | RPS11     |
| 2821 | 2 | 2.053 | 0.098 | 15/18  | P31943_HNRH1_HUMAN  | 7  | R.VHIEIGPDGR.V            | HNRNPH1   |
| 4824 | 2 | 2.052 | 0.06  | 13/24  | P62906_RL10A_HUMAN  | 0  | K.KYDAFLASESLIK.Q         | RPL10A    |
| 2190 | 2 | 2.051 | 0.074 | 14/16  | P35659_DEK_HUMAN    | 3  | R.SGVNSELVKR              | DEK       |
| 1893 | 2 | 2.046 | 0.252 | 20-Nov | SAV1_STRVL          | 2  | K.STLVGHDTFTK.V           |           |
| 3019 | 2 | 2.043 | 0.303 | 26-Dec | P05387_RLA2_HUMAN   | 0  | K.KILDVSGIEADDDR.L        | RPLP2     |
| 1092 | 2 | 2.043 | 0.103 | 20-Dec | P68400_CSK21_HUMAN  | 5  | R.VYTDVNTHRPR.E           | CSNK2A1   |
| 4603 | 2 | 2.038 | 0.238 | 14-Dec | P60660_MYL6_HUMAN   | 6  | K.EAFQLFDR.T              | MYL6      |
| 8573 | 2 | 2.038 | 0.086 | Dec-40 | P60709_ACTB_HUMAN   | 1  | K.DLYANTVLSGGT*M*YPIADR.M | ACTB      |
| 1291 | 2 | 2.036 | 0.263 | 14-Dec | P67870_CSK2B_HUMAN  | 2  | K.C#M*DVIYTPK.S           | CSNK2B    |

|      |   |       |       |        |                    |    |                         |           |
|------|---|-------|-------|--------|--------------------|----|-------------------------|-----------|
| 5134 | 2 | 2.035 | 0.203 | 16-Nov | P10599_THIO_HUMAN  | 0  | K.LEATINELV.-           | TXN       |
| 4710 | 2 | 2.03  | 0.214 | 12-Nov | O43143_DHX15_HUMAN | 0  | R.FTDILVR.H             | DHX15     |
| 4027 | 2 | 2.023 | 0.146 | 20-Dec | P19105_ML12A_HUMAN | 2  | K.KGNFNIEFTR.I          | MYL12A    |
| 4813 | 2 | 2.022 | 0.316 | 20/28  | P68400_CSK21_HUMAN | 2  | K.EPFFHGHNDYDQLVR.I     | CSNK2A1   |
| 2947 | 2 | 2.02  | 0.222 | 13/24  | P08107_HSP71_HUMAN | 1  | K.GSGSGPTIEEVD.-        | HSPA1A    |
| 2472 | 2 | 2.019 | 0.13  | 14-Nov | P62906_RL10A_HUMAN | 0  | R.ILGPGLNK.A            | RPL10A    |
| 229  | 2 | 2.018 | 0.069 | 12-Oct | P35659_DEK_HUMAN   | 3  | K.KKTDDEL.R.N           | DEK       |
| 6749 | 2 | 2.014 | 0.277 | 13/24  | P20839_IMDH1_HUMAN | 2  | R.IELVVAPAGVTLK.E       | IMPDH1    |
| 5475 | 2 | 2.011 | 0.247 | 14-Oct | P19338_NUCL_HUMAN  | 1  | K.GIAYIEFK.T            | NCL       |
| 9165 | 2 | 2.007 | 0.286 | 22-Dec | P35659_DEK_HUMAN   | 3  | K.NVGFQSGFPFEK.G        | DEK       |
| 1772 | 2 | 2.004 | 0.306 | 18-Nov | Q7L2E3_DHX30_HUMAN | 1  | K.SVEVEGYGSK.K          | DHX30     |
| 3048 | 2 | 2     | 0.363 | 16-Nov | P35659_DEK_HUMAN   | 2  | R.EPFTIAQGGK.G          | DEK       |
| 8383 | 2 | 1.991 | 0.154 | 26-Dec | P35659_DEK_HUMAN   | 2  | K.KLLASANLEEVMTM.K      | DEK       |
| 8974 | 2 | 1.991 | 0.235 | 28-Oct | P19784_CSK22_HUMAN | 1  | K.YSEVFEAINITNNER.V     | CSNK2A2   |
| 1920 | 2 | 1.988 | 0.056 | 14-Dec | Q9UGN5_PARP2_HUMAN | 1  | K.AEGLLQGGK.H           | PARP2     |
| 6169 | 2 | 1.985 | 0.323 | 14-Oct | P62736_ACTA_HUMAN  | 9  | R.DLTDYLMK.I            | ACTA2     |
| 492  | 2 | 1.985 | 0.08  | 12-Oct | P13010_XRCC5_HUMAN | 0  | K.VDEEQMK.Y             | XRCC5     |
| 6905 | 2 | 1.984 | 0.155 | 16-Oct | P13010_XRCC5_HUMAN | 0  | K.TLFLIEAK.K            | XRCC5     |
| 3528 | 2 | 1.982 | 0.309 | 14-Oct | P35659_DEK_HUMAN   | 1  | K.TTVKELIS.-            | DEK       |
| 621  | 2 | 1.982 | 0.239 | 14-Oct | P39023_RL3_HUMAN   | 4  | R.VIAHTQMR.L            | RPL3      |
| 1120 | 2 | 1.98  | 0.299 | 16-Nov | P06748_NPM_HUMAN   | 0  | K.GPSSVEDIK.A           | NPM1      |
| 1892 | 2 | 1.98  | 0.196 | 14-Nov | P67870_CSK2B_HUMAN | 3  | R.GIAQM*LEK.Y           | CSNK2B    |
| 1191 | 2 | 1.978 | 0.108 | 14-Oct | P35579_MYH9_HUMAN  | 0  | R.GELANEVK.V            | MYH9      |
| 5802 | 2 | 1.975 | 0.093 | 14/22  | Q99848_EBP2_HUMAN  | 1  | R.QAQAVALVLP.R.L        | EBNA1BP2  |
| 4088 | 2 | 1.971 | 0.154 | 12-Sep | P35659_DEK_HUMAN   | 3  | R.IHFFLSK.K             | DEK       |
| 2468 | 2 | 1.964 | 0.377 | 16-Sep | P35659_DEK_HUMAN   | 2  | R.EPFTIAQGGK.G          | DEK       |
| 9155 | 2 | 1.962 | 0.255 | 22-Oct | P35659_DEK_HUMAN   | 3  | K.NVGFQSGFPFEK.G        | DEK       |
| 3593 | 2 | 1.961 | 0.188 | 14-Dec | P18124_RL7_HUMAN   | 1  | K.SVNELIYK.R            | RPL7      |
| 556  | 2 | 1.956 | 0.234 | 14-Dec | P19338_NUCL_HUMAN  | 1  | K.QGTEIDGR.S            | NCL       |
| 1480 | 2 | 1.951 | 0.155 | 18-Nov | P62913_RL11_HUMAN  | 2  | R.GAKAEIELEK.G          | RPL11     |
| 9058 | 2 | 1.947 | 0.337 | 14/30  | P12268_IMDH2_HUMAN | 2  | K.LPIVNEDELVAIAR.T      | IMPDH2    |
| 2861 | 2 | 1.937 | 0.16  | 16-Oct | P49411_EFTU_HUMAN  | 1  | K.TTLTAATK.I            | TUFM      |
| 2346 | 2 | 1.936 | 0.086 | 16-Oct | P60660_MYL6_HUMAN  | 11 | R.HVLVTLGEK.M           | MYL6      |
| 9395 | 2 | 1.935 | 0.132 | Nov-36 | SAV_STRAV          | 0  | R.NAHSATTWSGQYVGGAEAR.I |           |
| 774  | 2 | 1.933 | 0.379 | 20/26  | P13010_XRCC5_HUMAN | 0  | K.EEASGSSVTAEAAK.K      | XRCC5     |
| 5575 | 2 | 1.932 | 0.091 | 13/20  | P11142_HSP7C_HUMAN | 5  | K.NSLESYAFNMK.A         | HSPA8     |
| 3556 | 2 | 1.931 | 0.162 | 22-Dec | P35659_DEK_HUMAN   | 2  | R.EPFTIAQGGKQK.L        | DEK       |
| 1260 | 2 | 1.928 | 0.147 | 13/14  | Q9UNX3_RL26L_HUMAN | 7  | K.DDEVQVVR.G            | RPL26L1   |
| 1786 | 2 | 1.927 | 0.055 | 15/16  | P35659_DEK_HUMAN   | 3  | R.SGVNSELVK.R           | DEK       |
| 1607 | 2 | 1.923 | 0.177 | 14-Sep | P35659_DEK_HUMAN   | 2  | K.EPEMPGPR.E            | DEK       |
| 3624 | 2 | 1.913 | 0.198 | 16-Aug | P33778_H2B1B_HUMAN | 6  | K.EYSYIYYK.V            | HIST1H2BB |
| 5404 | 2 | 1.909 | 0.099 | 16-Oct | P13010_XRCC5_HUMAN | 0  | R.FFMGNQVLK.V           | XRCC5     |
| 6912 | 2 | 1.902 | 0.089 | 30-Sep | P30050_RL12_HUMAN  | 0  | R.QAQIEVPSASALI.K.A     | RPL12     |
| 1954 | 2 | 1.899 | 0.069 | 14-Nov | P20839_IMDH1_HUMAN | 5  | K.EANEILQR.S            | IMPDH1    |
| 470  | 2 | 1.898 | 0.132 | 10-Aug | P13010_XRCC5_HUMAN | 0  | K.FSEEQR.F              | XRCC5     |
| 4410 | 2 | 1.898 | 0.261 | 16-Dec | P62987_RL40_HUMAN  | 22 | K.ESTLHLVLR.L           | UBA52     |
| 1290 | 2 | 1.895 | 0.076 | 14-Sep | P39023_RL3_HUMAN   | 1  | R.KSLLVQTK.R            | RPL3      |
| 6960 | 2 | 1.882 | 0.082 | 16-Oct | P27694_RFA1_HUMAN  | 1  | K.FFPLIEVVK.V           | RPA1      |
| 2718 | 2 | 1.881 | 0.135 | 20-Dec | P18124_RL7_HUMAN   | 0  | K.EVPAVPETLKK.K         | RPL7      |
| 970  | 2 | 1.88  | 0.211 | 14-Oct | P38646_GRP75_HUMAN | 1  | R.YDDPEVQK.D            | HSPA9     |
| 8092 | 2 | 1.88  | 0.262 | Nov-36 | SAV_STRAV          | 0  | R.NAHSATTWSGQYVGGAEAR.I |           |
| 5586 | 2 | 1.877 | 0.113 | 14/22  | Q9NR30_DDX21_HUMAN | 3  | R.NGIDILVGTGPR.I        | DDX21     |
| 1022 | 2 | 1.876 | 0.169 | 14-Nov | O60264_SMCA5_HUMAN | 0  | R.LVDQNLNK.I            | SMARCA5   |
| 1968 | 2 | 1.876 | 0.11  | 12-Nov | O75531_BAF_HUMAN   | 0  | K.KDEDLFR.E             | BANF1     |
| 1060 | 2 | 1.875 | 0.051 | 16-Oct | P35659_DEK_HUMAN   | 2  | K.KPPTDEELK.E           | DEK       |
| 1037 | 2 | 1.872 | 0.092 | 16-Nov | Q99848_EBP2_HUMAN  | 1  | K.KVQTEVLQK.R           | EBNA1BP2  |
| 2850 | 2 | 1.869 | 0.056 | 10-Sep | P06748_NPM_HUMAN   | 0  | K.FINYVK.N              | NPM1      |
| 1725 | 2 | 1.867 | 0.064 | 18-Oct | P46777_RL5_HUMAN   | 0  | K.RFPGYDSESK.E          | RPL5      |
| 4600 | 2 | 1.864 | 0.105 | 16-Nov | O76094_SRP72_HUMAN | 1  | K.ELYGQVLYR.L           | SRP72     |
| 5570 | 2 | 1.86  | 0.279 | 13/20  | Q9BVP2_GNL3_HUMAN  | 0  | R.VGVIGFPNVGK.S         | GNL3      |
| 5536 | 2 | 1.856 | 0.234 | 22-Oct | P35659_DEK_HUMAN   | 3  | K.NVGFQSGFPFEK.G        | DEK       |
| 6822 | 2 | 1.854 | 0.344 | 18-Jul | P35659_DEK_HUMAN   | 3  | K.SIC#EVLDLER.S         | DEK       |
| 4112 | 2 | 1.844 | 0.108 | 16-Nov | Q9NR30_DDX21_HUMAN | 0  | R.AAVIGDVIR.V           | DDX21     |
| 1658 | 2 | 1.843 | 0.095 | 12-Nov | Q16695_H31T_HUMAN  | 7  | R.EIAQDFK.T             | HIST3H3   |
| 1812 | 2 | 1.841 | 0.067 | 15/16  | P35659_DEK_HUMAN   | 3  | R.SGVNSELVK.R           | DEK       |
| 2572 | 2 | 1.84  | 0.317 | 14-Dec | P67870_CSK2B_HUMAN | 2  | K.C#MDVYTPK.S           | CSNK2B    |
| 1104 | 2 | 1.838 | 0.197 | 18-Nov | P62701_RS4X_HUMAN  | 3  | K.DANGNSFATR.L          | RPS4X     |
| 1606 | 2 | 1.837 | 0.123 | 12-Sep | P11021_GRP78_HUMAN | 0  | R.VM*EHFIK.L            | HSPA5     |
| 3981 | 2 | 1.83  | 0.106 | 20-Oct | P05186_PPBT_HUMAN  | 0  | R.DIDVIM*GGGRK.Y        | ALPL      |
| 1256 | 2 | 1.829 | 0.15  | 14-Nov | Q04837_SSBP_HUMAN  | 2  | R.VGQDPVLR.Q            | SSBP1     |
| 6904 | 2 | 1.823 | 0.085 | 28-Dec | P46087_NOP2_HUMAN  | 1  | K.ELLLSAIDSVNATSK.T     | NOP2      |
| 5734 | 2 | 1.818 | 0.295 | 22-Sep | P35659_DEK_HUMAN   | 3  | K.NVGFQSGFPFEK.G        | DEK       |
| 7963 | 2 | 1.812 | 0.118 | 26-Aug | Q16695_H31T_HUMAN  | 0  | R.LM*REIAQDFKTDLR.F     | HIST3H3   |
| 6137 | 2 | 1.81  | 0.172 | 28-Dec | P02545_LMNA_HUMAN  | 2  | R.TALINSTGEEVAM*RK.L    | LMNA      |
| 5407 | 2 | 1.809 | 0.151 | 20-Nov | P20839_IMDH1_HUMAN | 1  | K.NLIDAGVDGLR.V         | IMPDH1    |
| 3831 | 2 | 1.808 | 0.183 | 16-Aug | P35579_MYH9_HUMAN  | 2  | K.KLVVVPDVK.S           | MYH9      |
| 8126 | 2 | 1.807 | 0.105 | 13/18  | P18124_RL7_HUMAN   | 1  | K.EANNFLWPFK.L          | RPL7      |
| 607  | 2 | 1.804 | 0.122 | 18-Nov | Q00577_PURA_HUMAN  | 0  | K.IAEVGAGGNK.S          | PURA      |
| 521  | 2 | 1.803 | 0.075 | 14-Aug | P37108_SRP14_HUMAN | 1  | K.ISTVVSSK.E            | SRP14     |



|      |   |       |       |        |                    |    |                          |           |
|------|---|-------|-------|--------|--------------------|----|--------------------------|-----------|
| 6077 | 2 | 1.801 | 0.209 | 14-Sep | P62736 ACTA_HUMAN  | 9  | R.DLTDYLMK.I             | ACTA2     |
| 5546 | 2 | 1.798 | 0.056 | 13/24  | P35659 DEK_HUMAN   | 2  | K.LLASANLEEVTM*K.Q       | DEK       |
| 6971 | 2 | 1.797 | 0.147 | 28-Oct | P33778_H2B1B_HUMAN | 14 | K.AM*GIMNSFVNDIFER.I     | HIST1H2BB |
| 3906 | 2 | 1.793 | 0.261 | 14-Oct | Q7L2E3_DHX30_HUMAN | 1  | K.TAVEFLSK.A             | DHX30     |
| 4470 | 2 | 1.781 | 0.176 | 16-Dec | P46087_NOP2_HUMAN  | 2  | R.GVNLDPLGK.W            | NOP2      |
| 2245 | 2 | 1.777 | 0.067 | 14-Nov | O00425_IF2B3_HUMAN | 0  | K.EENFVSPK.E             | IGF2BP3   |
| 6608 | 2 | 1.776 | 0.14  | 13/24  | P21333_FLNA_HUMAN  | 3  | R.VKVEPSHDASKVK.A        | FLNA      |
| 6828 | 2 | 1.772 | 0.177 | 30-Sep | Q71U36_TBA1A_HUMAN | 8  | R.IHFPLATYAPVISAER.A     | TUBA1A    |
| 1906 | 2 | 1.768 | 0.094 | 16-Nov | P04792_HSPB1_HUMAN | 0  | K.DGVVEITGK.H            | HSPB1     |
| 4684 | 2 | 1.765 | 0.298 | 24-Dec | P13010_XRCC5_HUMAN | 0  | R.ANPQVGVAFPHIK.H        | XRCC5     |
| 6983 | 2 | 1.761 | 0.143 | Nov-36 | P04908_H2A1B_HUMAN | 10 | R.VTIAQGGVLPNIQAVLLPK.K  | HIST1H2AB |
| 2378 | 2 | 1.76  | 0.077 | 18-Nov | P62750_RL23A_HUMAN | 4  | K.FPLTTESAM*K.K          | RPL23A    |
| 1100 | 2 | 1.748 | 0.149 | 20-Nov | P68400_CSK21_HUMAN | 5  | R.VYTDVNTHRPR.E          | CSNK2A1   |
| 4262 | 2 | 1.744 | 0.071 | 14-Dec | P62829_RL23_HUMAN  | 3  | K.NLYIISVK.G             | RPL23     |
| 7171 | 2 | 1.728 | 0.09  | 28-Oct | P35579_MYH9_HUMAN  | 2  | K.NFINNPLAQADWAAK.K      | MYH9      |
| 2126 | 2 | 1.727 | 0.163 | 12-Sep | P39023_RL3_HUMAN   | 1  | K.SLLVQTK.R              | RPL3      |
| 2871 | 2 | 1.721 | 0.283 | 16-Dec | P62269_RS18_HUMAN  | 0  | R.VITIMQNPR.Q            | RPS18     |
| 5035 | 2 | 1.719 | 0.238 | 18-Oct | P13010_XRCC5_HUMAN | 0  | R.LTIGSNLSIR.I           | XRCC5     |
| 4356 | 2 | 1.716 | 0.11  | 14-Oct | P83731_RL24_HUMAN  | 2  | K.VFQFLNAK.C             | RPL24     |
| 2854 | 2 | 1.714 | 0.224 | 14/18  | P31943_HNRH1_HUMAN | 7  | R.VHIEIGPDGR.V           | HNRNPH1   |
| 1267 | 2 | 1.71  | 0.183 | 14-Aug | P15927_RFA2_HUMAN  | 1  | K.HMSVSSIK.Q             | RPA2      |
| 1555 | 2 | 1.706 | 0.158 | 14-Sep | P35580_MYH10_HUMAN | 1  | R.NTNPNFVR.C             | MYH10     |
| 1149 | 2 | 1.704 | 0.055 | 14-Sep | P35659_DEK_HUMAN   | 2  | K.SLIVEGKR.E             | DEK       |
| 6442 | 2 | 1.703 | 0.213 | 12-Sep | P35659_DEK_HUMAN   | 3  | R.IHFFLSK.K              | DEK       |
| 5859 | 2 | 1.698 | 0.091 | Dec-32 | P05386_RLA1_HUMAN  | 2  | K.KEESEESDDDMGFGLFD.-    | RPLP1     |
| 2137 | 2 | 1.695 | 0.133 | 14-Sep | P62280_RS11_HUMAN  | 2  | K.QPTIFQNK.K             | RPS11     |
| 8727 | 2 | 1.685 | 0.171 | Sep-34 | P11021_GRP78_HUMAN | 0  | R.IEIESFYEGEDFSETLTR.A   | HSPA5     |
| 1513 | 2 | 1.677 | 0.093 | 22-Nov | P27694_RFA1_HUMAN  | 1  | K.SGGVGGSNNTNWK.T        | RPA1      |
| 3909 | 2 | 1.673 | 0.256 | 16-Dec | P35579_MYH9_HUMAN  | 2  | K.KLVVWVPSDK.S           | MYH9      |
| 2116 | 2 | 1.669 | 0.069 | 18-Sep | P02545_LMNA_HUMAN  | 1  | R.SLETENAGLR.L           | LMNA      |
| 4394 | 2 | 1.669 | 0.229 | 14-Sep | P35579_MYH9_HUMAN  | 2  | K.LVVVWVPSDK.S           | MYH9      |
| 3999 | 2 | 1.668 | 0.057 | 18-Nov | Q71U36_TBA1A_HUMAN | 5  | K.DVNAAIATIK.T           | TUBA1A    |
| 4580 | 2 | 1.66  | 0.121 | 16-Sep | P35659_DEK_HUMAN   | 2  | K.GQKLC#EIER.I           | DEK       |
| 7503 | 2 | 1.658 | 0.067 | 22-Nov | P68400_CSK21_HUMAN | 3  | K.QLYQTLTDYDIR.F         | CSNK2A1   |
| 3248 | 2 | 1.655 | 0.279 | 16-Oct | P62807_H2B1C_HUMAN | 9  | K.ESYSVYVYK.V            | HIST1H2BC |
| 344  | 2 | 1.65  | 0.052 | 14-Jul | P62913_RL11_HUMAN  | 1  | R.ISKEEAMR.W             | RPL11     |
| 4036 | 2 | 1.648 | 0.111 | 16-Nov | P78332_RBM6_HUMAN  | 2  | K.SSSKKEMSK.R            | RBM6      |
| 6264 | 2 | 1.647 | 0.077 | Dec-36 | P05387_RLA2_HUMAN  | 0  | R.YVASYLLAALGGNSSPSAK.D  | RPLP2     |
| 889  | 2 | 1.647 | 0.175 | 14-Sep | IGKC_MOUSE         | 0  | K.TSTSPIVK.S             |           |
| 8096 | 2 | 1.631 | 0.128 | 22-Nov | P62807_H2B1C_HUMAN | 4  | -.MPEPAKSAPAPK.K         | HIST1H2BC |
| 4702 | 2 | 1.627 | 0.097 | 14-Oct | P60660_MYL6_HUMAN  | 6  | K.EAFQLFDR.T             | MYL6      |
| 1214 | 2 | 1.616 | 0.053 | 12-Sep | P52272_HNRPM_HUMAN | 3  | R.MGLSM*ER.M             | HNRNPM    |
| 4279 | 2 | 1.614 | 0.159 | 18-Nov | P27694_RFA1_HUMAN  | 1  | R.NIYLMDSGK.V            | RPA1      |
| 2270 | 2 | 1.612 | 0.101 | 14-Jul | P62917_RL8_HUMAN   | 3  | K.DIIHDPGR.G             | RPL8      |
| 3703 | 2 | 1.603 | 0.074 | 24-Nov | P62750_RL23A_HUMAN | 5  | R.LAPDYDALDVANK.I        | RPL23A    |
| 6751 | 2 | 1.601 | 0.265 | Nov-38 | P35030_TRY3_HUMAN  | 1  | R.LGEHNIKVLEGNEQFINAAK.I | PRSS3     |
| 6114 | 2 | 1.599 | 0.112 | Oct-34 | P11021_GRP78_HUMAN | 0  | R.IEIESFYEGEDFSETLTR.A   | HSPA5     |
| 4797 | 2 | 1.594 | 0.207 | 18-Nov | Q9UGN5_PARP2_HUMAN | 2  | K.GIYFADMSSK.S           | PARP2     |
| 1556 | 2 | 1.593 | 0.178 | 12-Aug | Q16695_H31T_HUMAN  | 7  | R.EIAQDFK.T              | HIST3H3   |
| 644  | 2 | 1.592 | 0.097 | 12-Sep | P52272_HNRPM_HUMAN | 2  | R.VGSEIER.M              | HNRNPM    |
| 3791 | 2 | 1.586 | 0.096 | 13/16  | P36578_RL4_HUMAN   | 2  | K.TKEAVLLLK.K            | RPL4      |
| 2541 | 2 | 1.563 | 0.066 | 16-Oct | Q00839_HNRPU_HUMAN | 0  | K.DLPEHAVLK.M            | HNRNPU    |
| 6831 | 2 | 1.563 | 0.064 | 16-Oct | P54652_HSP72_HUMAN | 0  | R.M*VQEAERYK.S           | HSPA2     |
| 1827 | 2 | 1.561 | 0.176 | 16-Nov | Q04837_SSBP_HUMAN  | 1  | K.IDYGEYM*DK.N           | SSBP1     |
| 1574 | 2 | 1.54  | 0.069 | 14-Sep | P62917_RL8_HUMAN   | 3  | K.DIIHDPGR.G             | RPL8      |
| 4386 | 2 | 1.535 | 0.075 | 10-Sep | O43143_DHX15_HUMAN | 0  | R.YYDILK.K               | DHX15     |
| 1772 | 2 | 1.512 | 0.054 | 16-Jul | Q7L2E3_DHX30_HUMAN | 1  | R.TVRLKELR.R             | DHX30     |
| 3275 | 2 | 1.509 | 0.108 | 14-Jul | P02545_LMNA_HUMAN  | 3  | K.NIYSEELR.E             | LMNA      |
