# Supplementary material
Source: PubMed Central journal article supplement (PMC5730476)
Supplement: NIHMS916645-supplement-Supp3.pdf [file NIHMS916645-supplement-Supp3.pdf]

| Unique to MIEG | Common to MIEG and HF-DEK | Unique to HF-DEK |
|----------------|---------------------------|------------------|
| DNAAF1         | ACTA2                     | AATF             |
| HBB            | ACTB                      | ANXA1            |
| OGT            | ALPL                      | BANF1            |
| PRMT1          | ANXA2                     | C11orf98         |
| SF3B4          | CCDC158                   | C1QBP            |
| TET2           | CDSN                      | C7orf50          |
| TUBB4A         | CRY1                      | CDC73            |
|                | CSNK2B                    | CSNK2A1          |
|                | FLNA                      | CSNK2A2          |
|                | GAPDH                     | DBN1             |
|                | HIST1H1A                  | DDX21            |
|                | HNRNPU                    | DDX24            |
|                | HSPA1L                    | DHX15            |
|                | HSPA5                     | DHX30            |
|                | HSPA9                     | DNAJC9           |
|                | HSPD1                     | EBNA1BP2         |
|                | Ighg1                     | EIF6             |
|                | LMNA                      | EMD              |
|                | MRPS31                    | GNL3             |
|                | MYH9                      | GRWD1            |
|                | MYLK4                     | H1FX             |
|                | MYO1E                     | H2AFV            |
|                | NONO                      | HIST1H2AA        |
|                | NPM1                      | HIST1H2AB        |
|                | OTUD4                     | HIST1H2AD        |
|                | PCDH15                    | HIST1H2BB        |
|                | PRSS1                     | HIST1H2BC        |
|                | PRSS3                     | HIST1H4A         |
|                | PTPRS                     | HIST2H2BC        |
|                | RECQL5                    | HIST3H3          |
|                | RMI1                      | HNRNPD           |
|                | SF3B3                     | HNRNPH1          |
|                | STK38                     | HNRNPM           |
|                | TUBA1A                    | HSPA1A           |
|                | TUBB                      | HSPA2            |
|                | TUBB2A                    | HSPA8            |
|                | TUFM                      | HSPB1            |
|                | TXN                       | HSPE1            |
|                | UBA52                     | IGF2BP3          |
|                | ZCCHC11                   | ILF3             |
|                |                           | IMPDH1           |
|                |                           | IMPDH2           |
|                |                           | KIAA0020         |
|                |                           | LRRC17           |
|                |                           | MFN2             |

|        |
|--------|
| MTERF1 |
|--------|

|       |
|-------|
| MYCBP |
|-------|

|       |
|-------|
| MYH10 |
|-------|

|       |
|-------|
| MYH11 |
|-------|

|        |
|--------|
| MYL12A |
|--------|

|      |
|------|
| MYL6 |
|------|

|       |
|-------|
| MYL6B |
|-------|

|      |
|------|
| MYL9 |
|------|

|        |
|--------|
| MYO15A |
|--------|

|       |
|-------|
| MYO1C |
|-------|

|     |
|-----|
| NCL |
|-----|

|       |
|-------|
| NCOR1 |
|-------|

|      |
|------|
| NOP2 |
|------|

|       |
|-------|
| PARP2 |
|-------|

|        |
|--------|
| POTEKP |
|--------|

|      |
|------|
| PURA |
|------|

|      |
|------|
| PURB |
|------|

|      |
|------|
| PWP1 |
|------|

|       |
|-------|
| RBM28 |
|-------|

|      |
|------|
| RBM6 |
|------|

|      |
|------|
| RBPJ |
|------|

|      |
|------|
| RPA1 |
|------|

|      |
|------|
| RPA2 |
|------|

|      |
|------|
| RPA3 |
|------|

|       |
|-------|
| RPL10 |
|-------|

|        |
|--------|
| RPL10A |
|--------|

|        |
|--------|
| RPL10L |
|--------|

|       |
|-------|
| RPL11 |
|-------|

|       |
|-------|
| RPL12 |
|-------|

|       |
|-------|
| RPL13 |
|-------|

|        |
|--------|
| RPL13A |
|--------|

|       |
|-------|
| RPL19 |
|-------|

|       |
|-------|
| RPL21 |
|-------|

|       |
|-------|
| RPL23 |
|-------|

|        |
|--------|
| RPL23A |
|--------|

|       |
|-------|
| RPL24 |
|-------|

|         |
|---------|
| RPL26L1 |
|---------|

|        |
|--------|
| RPL27A |
|--------|

|       |
|-------|
| RPL29 |
|-------|

|      |
|------|
| RPL3 |
|------|

|       |
|-------|
| RPL30 |
|-------|

|       |
|-------|
| RPL31 |
|-------|

|      |
|------|
| RPL4 |
|------|

|      |
|------|
| RPL5 |
|------|

|      |
|------|
| RPL7 |
|------|

|       |
|-------|
| RPL7A |
|-------|

|      |
|------|
| RPL8 |
|------|

|         |
|---------|
| RPLP0   |
| RPLP0P6 |
| RPLP1   |
| RPLP2   |
| RPS11   |
| RPS13   |
| RPS15   |
| RPS18   |
| RPS19   |
| RPS23   |
| RPS4X   |
| RRP15   |
| S100A14 |
| SETSIP  |
| SMARCA5 |
| SNRPD3  |
| SNRPE   |
| SRP14   |
| SRP68   |
| SRP72   |
| SSBP1   |
| SSRP1   |
| STAU2   |
| TMOD3   |
| TPM1    |
| TUBA4A  |
| TUBB1   |
| WDR12   |
| XRCC5   |
| XRCC6   |
| YBX1    |
