# Supplementary material
Source: PubMed Central journal article supplement (PMC5730476)
Supplement: NIHMS916645-supplement-Supp4.pdf [file NIHMS916645-supplement-Supp4.pdf]

| S.No. | Category               | ID         | Node Name (For Pathway Maps)    | Hu Only                                                                 | k        | Untreated | HF-DEK_logP | Hu_Only_GeneSet   | Untreated_Only_GeneSet             | HF-DEK_GeneSet                                              |
|-------|------------------------|------------|---------------------------------|-------------------------------------------------------------------------|----------|-----------|-------------|-------------------|------------------------------------|-------------------------------------------------------------|
| 171   | GO: Biological Process | GO:0033275 | Actin Cytoskeleton              | actin-myosin filament sliding                                           | 0        | 0         | 3.846476053 |                   |                                    | DBN1,MYL6,MYL6B,TPM1                                        |
| 193   | GO: Biological Process | GO:0006936 | Actin Cytoskeleton              | muscle contraction                                                      | 0        | 0         | 3.346112364 |                   |                                    |                                                             |
| 204   | GO: Biological Process | GO:0030239 | Actin Cytoskeleton              | myofibril assembly                                                      | 0        | 0         | 3.151025436 |                   |                                    | MYH10,MYH11,TM0D3,TPM1                                      |
| 229   | GO: Biological Process | GO:0030048 | Actin Cytoskeleton              | actin filament-based movement                                           | 0        | 0         | 2.87324223  |                   |                                    | DBN1,MYH10,MYL6,MYL6B,TPM1                                  |
| 1262  | Pathway                | 1269169    | Amylloid Fiber Formation        | Amlyloid fiber formation                                                | 0        | 0         | 2.846972317 |                   |                                    | HIST3H2AB,HIST3H2AC,HIST3H2AB,HIST3H2AC,HIST3H2AB           |
| 1278  | Pathway                | 138085     | Androgen Receptor               | Coregulation of Androgen receptor activity                              | 2.47497  | 0         | 0           | XRCC5,XRCC6       |                                    |                                                             |
| 252   | GO: Biological Process | GO:0043065 | Apoptosis                       | positive regulation of apoptotic process                                | 0        | 0         | 2.724531    |                   | EEF1A2,E1F5A,RP56,SPQ              |                                                             |
| 255   | GO: Biological Process | GO:0043065 | Apoptosis                       | positive regulation of programmed cell death                            | 0        | 0         | 2.709957    |                   | EEF1A2,E1F5A,RP56,SPQ              |                                                             |
| 262   | GO: Biological Process | GO:0010942 | Apoptosis                       | positive regulation of cell death                                       | 0        | 0         | 2.616376    |                   | EEF1A2,E1F5A,RP56,SPQ              |                                                             |
| 304   | GO: Biological Process | GO:1902177 | Apoptosis                       | positive regulation of oxidative stress-induced intrinsic apoptotic sig | 0        | 0         | 2.225634    |                   | SPQ                                |                                                             |
| 305   | GO: Biological Process | GO:1904714 | Autophagy                       | regulation of chaperone-mediated autophagy                              | 0        | 0         | 2.225634    |                   | EEF1A2                             |                                                             |
| 137   | Pathway                | 1496831    | Autophagy                       | Mitophagy - animal                                                      | 0        | 0         | 1.802954316 |                   |                                    | CSNK2A1,CSNK2A2,MFN2                                        |
| 1240  | Pathway                | 127959     | BARO1 Signaling                 | BARO1 signaling events                                                  | 3.058425 | 0         | 0           | XRCC5,XRCC6       |                                    |                                                             |
| 176   | GO: Biological Process | GO:0006284 | Base-Excision Repair            | base-excision repair                                                    | 0        | 0         | 3.725736264 |                   |                                    | PARP2,RPAP1,RPAP2,RPAP3                                     |
| 1217  | Pathway                | 1270351    | Base-Excision Repair            | Base Excision Repair                                                    | 0        | 0         | 3.658796172 |                   |                                    | PARP2,RPAP1,RPAP2,RPAP3                                     |
| 1243  | Pathway                | 1270366    | Base-Excision Repair            | PCNA-Dependent Long Patch Base Excision Repair                          | 0        | 0         | 3.207761139 |                   |                                    | RPAP1,RPAP2,RPAP3                                           |
| 1145  | Pathway                | 1391216    | B-WICH RNA Regulation           | B-WICH complex positively regulates rRNA expression                     | 0        | 0         | 10          |                   |                                    |                                                             |
| 219   | GO: Biological Process | GO:0044770 | Cell Cycle                      | cell cycle phase transition                                             | 0        | 0         | 2.990234118 |                   |                                    |                                                             |
| 284   | GO: Biological Process | GO:0022402 | Cell Cycle                      | cell cycle process                                                      | 0        | 0         | 2.413905803 |                   |                                    |                                                             |
| 1178  | Pathway                | 1269741    | Cell Cycle                      | Cell Cycle                                                              | 0        | 0         | 5.002668441 |                   |                                    |                                                             |
| 287   | GO: Biological Process | GO:0030099 | Cell Differentiation            | myeloid cell differentiation                                            | 0        | 0         | 3.002053957 |                   |                                    |                                                             |
| 289   | GO: Biological Process | GO:0030218 | Cell Differentiation            | erythrocyte differentiation                                             | 0        | 0         | 2.390052    |                   | RP519,RP56                         |                                                             |
| 1202  | Pathway                | 133129     | Cell Differentiation            | Activation of HOX genes during differentiation                          | 0        | 0         | 4.121171682 |                   |                                    |                                                             |
| 1203  | Pathway                | 1339140    | Cell Differentiation            | Activation of anterior HOX genes in hindbrain development during e      | 0        | 0         | 4.121171682 |                   |                                    |                                                             |
| 209   | GO: Biological Process | GO:0038089 | Cell Migration                  | positive regulation of cell migration by vascular endothelial growth f  | 0        | 0         | 3.065494004 |                   |                                    | HSB1,MYO1C                                                  |
| 1195  | Pathway                | 1270307    | Cell Migration                  | Sema4D induced cell migration and growth-cone collapse                  | 0        | 0         | 4.417139048 |                   |                                    | MYH10,MYH11,MYL6,MYL9                                       |
| 174   | GO: Biological Process | GO:0041101 | Cellular Homeostasis            | erythrocyte homeostasis                                                 | 0        | 0         | 3.830788    |                   | RP519,RP524,RP56                   |                                                             |
| 181   | GO: Biological Process | GO:0041102 | Cellular Homeostasis            | cellular homeostasis                                                    | 0        | 0         | 3.560984    |                   | RP519,RP524,RP56                   |                                                             |
| 239   | GO: Biological Process | GO:0048872 | Cellular Homeostasis            | homeostasis of number of cells                                          | 0        | 0         | 2.790043    |                   | RP519,RP524,RP56                   |                                                             |
| 207   | GO: Biological Process | GO:0072752 | Cellular Rapamycin Response     | cellular response to rapamycin                                          | 0        | 0         | 3.060934    |                   | HNRNPK                             |                                                             |
| 241   | GO: Biological Process | GO:1901355 | Cellular Rapamycin Response     | response to rapamycin                                                   | 0        | 0         | 2.768835    |                   | HNRNPK                             |                                                             |
| 1180  | Pathway                | 1269754    | Checkpoint Arrest               | G2/M DNA damage checkpoint                                              | 0        | 0         | 4.907162673 |                   |                                    | HIST3H2AB,HIST3H2AC,HIST3H2AB,HIST3H2AC,HIST3H2AB,HIST3H2AC |
| 1241  | Pathway                | 1269753    | Checkpoint Arrest               | G2/M Checkpoint                                                         | 0        | 0         | 3.308504616 |                   |                                    |                                                             |
| 1261  | Pathway                | 1269742    | Checkpoint Arrest               | Cell Cycle Checkpoints                                                  | 0        | 0         | 2.872624301 |                   |                                    | HIST3H2B,NAP1L1                                             |
| 151   | GO: Biological Process | GO:0006334 | Chromatin Assembly              | nucleosome assembly                                                     | 2.185322 | 0         | 4.364753764 |                   |                                    |                                                             |
| 169   | GO: Biological Process | GO:0031497 | Chromatin Assembly              | chromatin assembly                                                      | 0        | 0         | 4.041165804 |                   |                                    |                                                             |
| 177   | GO: Biological Process | GO:0034728 | Chromatin Assembly              | nucleosome organization                                                 | 0        | 0         | 3.878877064 |                   |                                    |                                                             |
| 177   | GO: Biological Process | GO:0006333 | Chromatin Assembly              | chromatin assembly or disassembly                                       | 0        | 0         | 3.640874569 |                   |                                    |                                                             |
| 1167  | Pathway                | 1269854    | Chromatin Assembly              | Nucleosome assembly                                                     | 0        | 0         | 5.70535517  |                   |                                    |                                                             |
| 1168  | Pathway                | 1269855    | Chromatin Assembly              | Deposition of new CENPA-containing nucleosomes at the centromere        | 0        | 0         | 5.70535517  |                   |                                    |                                                             |
| 197   | GO: Biological Process | GO:0006325 | Chromatin Organization          | chromatin organization                                                  | 0        | 0         | 3.288306377 |                   |                                    |                                                             |
| 1265  | Pathway                | 1270433    | Chromatin Organization          | Chromatin organization                                                  | 0        | 0         | 2.716104824 |                   |                                    |                                                             |
| 1266  | Pathway                | 1270434    | Chromatin Organization          | Chromatin modifying enzymes                                             | 0        | 0         | 2.716104824 |                   |                                    |                                                             |
| 132   | GO: Biological Process | GO:0051276 | Chromosome Organization         | chromosome organization                                                 | 0        | 0         | 10          |                   |                                    |                                                             |
| 1149  | Pathway                | 1269853    | Chromosome Organization         | Chromosome Maintenance                                                  | 0        | 0         | 10          |                   |                                    |                                                             |
| 1170  | Pathway                | 1269813    | Chromosome Condensation         | Condensation of Prophase Chromosomes                                    | 0        | 0         | 5.62539133  |                   |                                    |                                                             |
| 1279  | Pathway                | 1269822    | Chromosome Condensation         | Condensation of Prometaphase Chromosomes                                | 0        | 0         | 2.46634808  |                   |                                    |                                                             |
| 131   | GO: Biological Process | GO:0071103 | DNA Conformation Change         | DNA conformation change                                                 | 0        | 0         | 2.766884    |                   | HIST3H2B,NAP1L1,PURA               |                                                             |
| 132   | GO: Biological Process | GO:0022392 | DNA Conformation Change         | DNA geometric change                                                    | 2.321855 | 0         | 3.73556951  | XRCC5,XRCC6       |                                    | ANXA1,MTERF1,PURA,XRCC5,XRCC6                               |
| 143   | GO: Biological Process | GO:0006302 | DNA Double-Strand Break Repair  | double-strand break repair                                              | 2.71528  | 0         | 4.371863028 | RPAP1,XRCC5,XRCC6 |                                    | HIST3H2A,HIST3H2AB,HIST3H2AC,HIST3H2AC,HIST3H2AB,HIST3H2AC  |
| 159   | GO: Biological Process | GO:0031480 | DNA Double-Strand Break Repair  | double-strand break repair via nonhomologous end joining                | 2.458018 | 0         | 2.97593     | XRCC5,XRCC6       |                                    | HIST3H2A,HIST3H2AB,HIST3H2AC,HIST3H2AC,HIST3H2AB,HIST3H2AC  |
| 1147  | Pathway                | 1269805    | DNA Double-Strand Break Repair  | DNA Double-Strand Break Repair                                          | 2.692696 | 0         | 0           | RPAP1,XRCC5,XRCC6 |                                    |                                                             |
| 1183  | Pathway                | 1309101    | DNA Double-Strand Break Repair  | Processing of DNA double-strand break ends                              | 0        | 0         | 4.819210016 |                   |                                    | HIST3H2B,HIST3H2AC,HIST3H2AB,HIST3H2AB,HIST3H2AB,HIST3H2AB  |
| 1236  | Pathway                | 1309096    | DNA Double-Strand Break Repair  | DNA Double-Strand Break Response                                        | 0        | 0         | 3.402576338 |                   |                                    |                                                             |
| 180   | GO: Biological Process | GO:0006259 | DNA Metabolism                  | DNA metabolic process                                                   | 0        | 0         | 3.60726518  |                   |                                    |                                                             |
| 1182  | Pathway                | 1269740    | DNA Methylation                 | DNA methylation                                                         | 0        | 0         | 4.822611616 |                   |                                    |                                                             |
| 144   | GO: Biological Process | GO:0071481 | DNA Repair                      | cellular response to X-ray                                              | 4.251732 | 0         | 2.83510803  | XRCC5,XRCC6       |                                    | XRCC5,XRCC6                                                 |
| 155   | GO: Biological Process | GO:0010165 | DNA Repair                      | response to X-ray                                                       | 3.093534 | 0         | 2.897970452 | XRCC5,XRCC6       |                                    | ANXA1,XRCC5,XRCC6                                           |
| 161   | GO: Biological Process | GO:0000726 | DNA Repair                      | non-recombinational repair                                              | 2.375866 | 0         | 2.819613042 | XRCC5,XRCC6       |                                    | HIST3H2A,HIST3H2AB,HIST3H2AC,HIST3H2AC,HIST3H2AB,HIST3H2AC  |
| 184   | GO: Biological Process | GO:0071480 | DNA Repair                      | cellular response to gamma radiation                                    | 3.489883 | 0         | 0           | XRCC5,XRCC6       |                                    | RPAP1,RPAP2,RPAP3                                           |
| 198   | GO: Biological Process | GO:0000381 | DNA Repair                      | DNA repair                                                              | 0        | 0         | 3.264250231 |                   |                                    |                                                             |
| 240   | GO: Biological Process | GO:0042769 | DNA Repair                      | DNA damage response, detection of DNA damage                            | 0        | 0         | 2.787298172 |                   |                                    |                                                             |
| 260   | GO: Biological Process | GO:0010332 | DNA Repair                      | response to gamma radiation                                             | 2.636431 | 0         | 0           | XRCC5,XRCC6       |                                    | RPAP1,RPAP2,RPAP3                                           |
| 261   | GO: Biological Process | GO:0071479 | DNA Repair                      | cellular response to ionizing radiation                                 | 2.606355 | 0         | 0           | XRCC5,XRCC6       |                                    |                                                             |
| 1198  | Pathway                | 1270350    | DNA Repair                      | DNA Repair                                                              | 0        | 0         | 4.270836132 |                   |                                    |                                                             |
| 1234  | Pathway                | 1309098    | DNA Repair                      | Recruitment and ATM-mediated phosphorylation of repair and signa        | 0        | 0         | 3.420859078 |                   |                                    |                                                             |
| 1264  | Pathway                | 1270368    | DNA Repair                      | Recognition of DNA damage by PCNA-containing replication comple         | 0        | 0         | 2.746062887 |                   |                                    |                                                             |
| 164   | GO: Biological Process | GO:0032508 | DNA Replication                 | DNA duplex unwinding                                                    | 2.375866 | 0         | 2.819613042 | XRCC5,XRCC6       |                                    | ANXA1,PURA,XRCC5,XRCC6                                      |
| 299   | GO: Biological Process | GO:2000371 | DNA Replication                 | regulation of DNA topoisomerase (ATP-hydrolyzing) activity              | 2.292338 | 0         | 0           | HNRNP1            |                                    | RPAP1,RPAP2,RPAP3,SSBP1                                     |
| 300   | GO: Biological Process | GO:2000373 | DNA Replication                 | positive regulation of DNA topoisomerase (ATP-hydrolyzing) activity     | 2.292338 | 0         | 0           | HNRNP1            |                                    | RPAP1,RPAP2,RPAP3                                           |
| 1215  | Pathway                | 83039      | DNA Replication                 | DNA replication                                                         | 0        | 0         | 3.705785236 |                   |                                    | RPAP1,RPAP2,RPAP3                                           |
| 1219  | Pathway                | 1269789    | DNA Replication                 | Processive synthesis on the lagging strand                              | 0        | 0         | 3.658244089 |                   |                                    | RPAP1,RPAP2,RPAP3                                           |
| 1242  | Pathway                | 1269788    | DNA Replication                 | Lagging Strand Synthesis                                                | 0        | 0         | 3.72715058  |                   |                                    | RPAP1,RPAP2,RPAP3                                           |
| 1269  | Pathway                | 1269784    | DNA Replication                 | DNA strand elongation                                                   | 0        | 0         | 2.664203204 |                   |                                    | RPAP1,RPAP2,RPAP3                                           |
| 1277  | Pathway                | 1269757    | DNA Replication                 | Activation of ATR in response to replication stress                     | 0        | 0         | 2.481587936 |                   |                                    | RPAP1,RPAP2,RPAP3                                           |
| 1306  | Pathway                | P00017     | DNA Replication                 | DNA replication                                                         | 0        | 0         | 2.138995672 |                   |                                    | HIST3H3,RPAP2                                               |
| 251   | GO: Biological Process | GO:0045815 | Epigenetic Regulation           | positive regulation of gene expression, epigenetic                      | 0        | 0         | 2.717544786 |                   |                                    | DDX21,HIST1H4A,MYO1C,SMARCA5                                |
| 1152  | Pathway                | 1391215    | Epigenetic Regulation           | Positive epigenetic regulation of rRNA expression                       | 0        | 0         | 10          |                   |                                    |                                                             |
| 1173  | Pathway                | 1269724    | Epigenetic Regulation           | Epigenetic regulation of gene expression                                | 0        | 0         | 5.418455626 |                   |                                    |                                                             |
| 1191  | Pathway                | 1269737    | Epigenetic Regulation           | Negative epigenetic regulation of rRNA expression                       | 0        | 0         | 4.495425393 |                   |                                    |                                                             |
| 166   | GO: Biological Process | GO:0040029 | Gene Expression Regulation      | regulation of gene expression, epigenetic                               | 0        | 0         | 4.999464473 |                   |                                    |                                                             |
| 175   | GO: Biological Process | GO:0006342 | Gene Expression Regulation      | chromatin silencing                                                     | 0        | 0         | 3.818909242 |                   |                                    |                                                             |
| 182   | GO: Biological Process | GO:0010458 | Gene Expression Regulation      | gene silencing                                                          | 0        | 0         | 3.557843663 |                   |                                    |                                                             |
| 183   | GO: Biological Process | GO:0045814 | Gene Expression Regulation      | negative regulation of gene expression, epigenetic                      | 0        | 0         | 3.54741087  |                   |                                    |                                                             |
| 1250  | Pathway                | 1269719    | Gene Silencing by RNA           | Gene Silencing by RNA                                                   | 0        | 0         | 3.050635919 |                   |                                    |                                                             |
| 151   | GO: Biological Process | GO:1900034 | Heat Stress Response            | regulation of cellular response to heat                                 | 2.375866 | 0         | 3.866833388 | HSPA1L,RPAP1      |                                    | HSPA1A,HSPA8,RPAP1,RPAP2,RPAP3                              |
| 208   | GO: Biological Process | GO:0034605 | Heat Stress Response            | cellular response to heat                                               | 0        | 0         | 3.068511838 |                   |                                    | HSPA1A,HSPA8,RPAP1,RPAP2,RPAP3                              |
| 212   | GO: Biological Process | GO:0009408 | Heat Stress Response            | response to heat                                                        | 0        | 0         | 3.054613964 |                   |                                    | HSPA1A,HSPA2,HSPA8,RPAP1,RPAP2,RPAP3                        |
| 213   | GO: Biological Process | GO:0009266 | Heat Stress Response            | response to temperature stimulus                                        | 0        | 0         | 3.050403762 |                   |                                    | HSPA1A,HSPA2,HSPA8,BMYH1,RPAP1,RPAP2,RPAP3                  |
| 1205  | Pathway                | 1270421    | Heat Stress Response            | Cellular response to heat stress                                        | 0        | 0         | 4.0819511   |                   |                                    | HSPA1A,HSPA2,HSPA8,RPAP1,RPAP2,RPAP3                        |
| 187   | GO: Biological Process | GO:0006323 | Histone Modification            | DNA packaging                                                           | 0        | 0         | 3.400193915 |                   |                                    |                                                             |
| 1179  | Pathway                | 1270436    | Histone Modification            | H2AC deacetylate histones                                               | 0        | 0         | 4.967545051 |                   |                                    |                                                             |
| 1190  | Pathway                | 1269735    | Histone Modification            | PRC2 methylates histones and DNA                                        | 0        | 0         | 4.505245353 |                   |                                    |                                                             |
| 1238  | Pathway                | 1270439    | Histone Modification            | RMTs methylate histone arginines                                        | 0        | 0         | 3.350599035 |                   |                                    |                                                             |
| 1255  | Pathway                | 1270435    | Histone Modification            | HATs acetylate histones                                                 | 0        | 0         | 2.970298345 |                   |                                    |                                                             |
| 1158  | Pathway                | 1269059    | HIV Life Cycle                  | Early Phase of HIV Life Cycle                                           | 3.701982 | 0         | 3.752591483 | XRCC5,XRCC6       |                                    | BANF1,XRCC5,XRCC6                                           |
| 275   | GO: Biological Process | GO:0006312 | Homologous Recombination Repair | Homologous recombination                                                | 0        | 0         | 2.507436288 | 0                 | RPAP1,XRCC5,XRCC6                  | RPAP1,RPAP2,RPAP3                                           |
| 293   | GO: Biological Process | GO:0006310 | Homologous Recombination Repair | DNA recombination                                                       | 2.331984 | 0         | 0           | RPAP1,XRCC5,XRCC6 |                                    |                                                             |
| 1185  | Pathway                | 1309099    | Homologous Recombination Repair | Homology Directed Repair                                                | 0        | 0         | 4.755997408 |                   |                                    |                                                             |
| 1209  | Pathway                | 1309100    | Homologous Recombination Repair | HDR through Homologous Recombination (HR) or Single Strand Ann          | 0        | 0         | 3.97424004  |                   |                                    |                                                             |
| 1232  | Pathway                | 83046      | Homologous Recombination Repair | Homologous recombination                                                | 0        | 0         | 3.483944489 |                   |                                    | RPAP1,RPAP2,RPAP3,SSBP1                                     |
| 1286  | Pathway                | 1309104    | Homologous Recombination Repair | Presynaptic phase of homologous DNA pairing and strand exchange         | 0        | 0         | 2.385275537 |                   |                                    | RPAP1,RPAP2,RPAP3                                           |
| 1296  | Pathway                | 1309103    | Homologous Recombination Repair | Homologous DNA Pairing and Strand Exchange                              | 0        | 0         | 2.29629741  |                   |                                    | RPAP1,RPAP2,RPAP3                                           |
| 1340  | Pathway                | 1309102    | Homologous Recombination Repair | HDR through Homologous Recombination (HR)                               | 0        | 0         | 1.734013219 |                   |                                    | RPAP1,RPAP2,RPAP3                                           |
| 278   | GO: Biological Process | GO:0008612 | Hypusine Synthesis              | peptidyl-hypusine modification to peptidyl-hypusine                     | 0        | 0         | 2.468151    | 0                 | E1F5A                              |                                                             |
| 1287  | Pathway                | 1268707    | Hypusine Synthesis              | Hypusine synthesis from eIF5A-hypusine                                  | 0        | 0         | 2.379794    | 0                 | E1F5A                              |                                                             |
| 210   | GO: Biological Process | GO:0071353 | Inflammation                    | cellular response to interleukin-4                                      | 0        | 0         | 3.063865836 |                   |                                    | IMPDH2,RP13,RP1P0                                           |
| 231   | GO: Biological Process | GO:0070670 | Inflammation                    | response to interleukin-4                                               | 0        | 0         | 2.859904349 |                   |                                    | IMPDH2,RP13,RP1P0                                           |
| 285   | GO: Biological Process | GO:0032481 | Inflammation                    | positive regulation of type I interferon production                     | 2.421799 | 0         | 0           | XRCC5,XRCC6       |                                    | XRCC5,XRCC6                                                 |
| 1163  | Pathway                | 1269773    | Inflammation                    | IRF3-mediated induction of type I IFN                                   | 3.768533 | 0         | 2.319206091 | XRCC5,XRCC6       |                                    | XRCC5,XRCC6                                                 |
| 1166  | Pathway                | 1269772    | Inflammation                    | STING mediated induction of host immune responses                       | 3.582633 | 0         | 2.138995672 | XRCC5,XRCC6       |                                    |                                                             |
| 1122  | Pathway                | 1269109    | Influenza Life Cycle            | Influenza Life Cycle                                                    | 0        | 10        | 10          |                   | RP131,RP136,RP518,RP519,RP524,RP56 |                                                             |
| 1123  | Pathway                | 1269115    | Influenza Life Cycle            | Influenza Viral RNA Transcription and Replication                       | 0        | 10        | 10          |                   | RP131,RP136,RP518,RP519,RP524,RP56 |                                                             |
| 1132  | Pathway                | 1269108    | Influenza Life Cycle            | Influenza Infection                                                     | 0        | 10        | 10          |                   | RP131,RP136,RP518,RP519,RP524,RP56 |                                                             |
| 274   | GO: Biological Process | GO:0036297 | Interstrand Cross-Link Repair   | interstrand crosslink repair                                            | 0        | 0         | 2.533355    |                   |                                    | RPAP1,RPAP2,RPAP3                                           |
| 1285  | Pathway                | 1309121    | Interstrand Cross-Link Repair   | Fanconi Anemia Pathway                                                  | 0        | 0         | 2.385275537 |                   |                                    |                                                             |









|     |        |              |                           |          |          |             |                                    |                                               |
|-----|--------|--------------|---------------------------|----------|----------|-------------|------------------------------------|-----------------------------------------------|
| 531 | Domain | IPR011709    | DUF1605                   | 3.674906 | 0        | 2.298535012 | DHX15,DHX30                        | DHX15,DHX30                                   |
| 532 | Domain | PF07717      | OB_NTP_bind               | 3.674906 | 0        | 2.298535012 | DHX15,DHX30                        | DHX15,DHX30                                   |
| 533 | Domain | IPR029048    | HSP70_C                   | 1.781696 | 0        | 4.177018463 | HSPA1L,HSPA2,HSPA8                 | HSPA1A,HSPA2,HSPA8                            |
| 534 | Domain | IPR018181    | Heat_shock_70_CS          | 1.781696 | 0        | 4.177018463 | HSPA1L                             | HSPA1A,HSPA2,HSPA8                            |
| 535 | Domain | 1.20.1270.10 | -                         | 1.781696 | 0        | 4.177018463 | HSPA1L                             | HSPA1A,HSPA2,HSPA8                            |
| 536 | Domain | IPR002464    | DNA/RNA_helicase_DEAH_CS  | 3.040043 | 0        | 2.861324822 | DHX15,DHX30                        | DHX15,DHX30,SMARCA5                           |
| 537 | Domain | SMO0847      | HA2                       | 3.624094 | 0        | 2.249166037 | DHX15,DHX30                        | DHX15,DHX30                                   |
| 538 | Domain | IPR075022    | Helicase-assoc_dom        | 3.624094 | 0        | 2.249166037 | DHX15,DHX30                        | DHX15,DHX30                                   |
| 539 | Domain | PF04408      | HA2                       | 3.624094 | 0        | 2.249166037 | DHX15,DHX30                        | DHX15,DHX30                                   |
| 540 | Domain | PS00690      | DEAH_ATP_HELICASE         | 2.968623 | 0        | 2.757056719 | DHX15,DHX30                        | DHX15,DHX30,SMARCA5                           |
| 541 | Domain | IPR008991    | Translation_prot_S13-like | 0        | 1.884085 | 3.808868009 |                                    | RPL21,RPL26L1,RPL8                            |
| 542 | Domain | IPR00012     | HSP70                     | 1.692318 | 0        | 3.808115102 | HSPA1L                             | HSPA1A,HSPA2,HSPA8                            |
| 543 | Domain | PS01036      | HSP70_3                   | 1.666255 | 0        | 3.808868009 | HSPA1L                             | HSPA1A,HSPA2,HSPA8                            |
| 544 | Domain | PS00329      | HSP70_2                   | 1.666255 | 0        | 3.808868009 | HSPA1L                             | HSPA1A,HSPA2,HSPA8                            |
| 545 | Domain | PS00297      | HSP70_1                   | 1.666255 | 0        | 3.808868009 | HSPA1L                             | HSPA1A,HSPA2,HSPA8                            |
| 546 | Domain | IPR013126    | Hsp_70_fam                | 1.641697 | 0        | 3.731683512 | HSPA1L                             | HSPA1A,HSPA2,HSPA8                            |
| 547 | Domain | PF00416      | Ribosomal_S13             | 0        | 3.068186 | 2.198034017 |                                    | RP518                                         |
| 548 | Domain | IPR018269    | Ribosomal_S13_CS          | 0        | 3.068186 | 2.198034017 |                                    | RP518                                         |
| 549 | Domain | PF01090      | Ribosomal_S19e            | 0        | 3.068186 | 2.198034017 |                                    | RP519                                         |
| 550 | Domain | PF01198      | Ribosomal_S11e            | 0        | 3.068186 | 2.198034017 |                                    | RPL31                                         |
| 551 | Domain | SMO1413      | Ribosomal_S19e            | 0        | 3.068186 | 2.198034017 |                                    | RP519                                         |
| 552 | Domain | IPR027437    | S10_RbmI_prot_S13_C       | 0        | 3.068186 | 2.198034017 |                                    | RP518                                         |
| 553 | Domain | PS01144      | RIBOSOMAL_S11E            | 0        | 3.068186 | 2.198034017 |                                    | RPL31                                         |
| 554 | Domain | PS00628      | RIBOSOMAL_S19E            | 0        | 3.068186 | 2.198034017 |                                    | RP519                                         |
| 555 | Domain | IPR000054    | Ribosomal_S11e            | 0        | 3.068186 | 2.198034017 |                                    | RPL31                                         |
| 556 | Domain | IPR028599    | WDK12/Tm1                 | 0        | 3.068186 | 2.198034017 |                                    | WDR12                                         |
| 557 | Domain | IPR012459    | Rpl15                     | 0        | 3.068186 | 2.198034017 |                                    | RRP15                                         |
| 558 | Domain | 3.10.440.10  | -                         | 0        | 3.068186 | 2.198034017 |                                    | RPL31                                         |
| 559 | Domain | 4.10.910.10  | -                         | 0        | 3.068186 | 2.198034017 |                                    | RP518                                         |
| 560 | Domain | P006030      | Ribosomal_L11e            | 0        | 3.068186 | 2.198034017 |                                    | RPL31                                         |
| 561 | Domain | IPR012166    | Ribosomal_S19e            | 0        | 3.068186 | 2.198034017 |                                    | RP519                                         |
| 562 | Domain | IPR001892    | Ribosomal_S13             | 0        | 3.068186 | 2.198034017 |                                    | RP518                                         |
| 563 | Domain | P0003854     | Ribosomal_S19e            | 0        | 3.068186 | 2.198034017 |                                    | RP519                                         |
| 564 | Domain | PF07890      | Rpl15p                    | 0        | 3.068186 | 2.198034017 |                                    | RRP15                                         |
| 565 | Domain | PS00846      | RIBOSOMAL_S13_1           | 0        | 3.068186 | 2.198034017 |                                    | RP518                                         |
| 566 | Domain | IPR030500    | PURalpha                  | 0        | 3.068186 | 2.198034017 |                                    | PURA                                          |
| 567 | Domain | IPR023621    | Ribosomal_S11e_dom        | 0        | 3.068186 | 2.198034017 |                                    | RPL31                                         |
| 568 | Domain | SMO1380      | Ribosomal_S11e            | 0        | 3.068186 | 2.198034017 |                                    | RPL31                                         |
| 569 | Domain | PS50159      | RIBOSOMAL_S13_2           | 0        | 3.068186 | 2.198034017 |                                    | RP518                                         |
| 570 | Domain | IPR018277    | Ribosomal_S19e_CS         | 0        | 3.068186 | 2.198034017 |                                    | RP519                                         |
| 571 | Domain | IPR020052    | Ribosomal_L11e_CS         | 0        | 3.068186 | 2.198034017 |                                    | RPL31                                         |
| 572 | Domain | PF00035      | dsm                       | 1.596472 | 0        | 3.590406084 | DHX30                              | DHX30,JLF3,STAU2                              |
| 573 | Domain | PS50137      | D5_RBD                    | 1.575548 | 0        | 3.525509007 | DHX30                              | DHX30,JLF3,STAU2                              |
| 574 | Domain | IPR013141    | Methyltr_RsmF_N           | 2.891908 | 0        | 2.198034017 | NOP2                               | NOP2                                          |
| 575 | Domain | IPR014893    | Ku_PK_bind                | 2.891908 | 0        | 2.198034017 | XRCC5                              | XRCC5                                         |
| 576 | Domain | IPR023273    | RCMT_NOP2                 | 2.891908 | 0        | 2.198034017 | NOP2                               | NOP2                                          |
| 577 | Domain | IPR006165    | Ku70                      | 2.891908 | 0        | 2.198034017 | XRCC6                              | XRCC6                                         |
| 578 | Domain | IPR011023    | Nop3p                     | 2.891908 | 0        | 2.198034017 | NOP2                               | NOP2                                          |
| 579 | Domain | IPR02050     | RIBOSOMAL_L23             | 2.891908 | 0        | 2.198034017 | RPL23A                             | RPL23A                                        |
| 580 | Domain | IPR001014    | Ribosomal_L23/L25_CS      | 2.891908 | 0        | 2.198034017 | RPL23A                             | RPL23A                                        |
| 581 | Domain | IPR031657    | REPA_OB_2                 | 2.891908 | 0        | 2.198034017 | RPA1                               | RPA1                                          |
| 582 | Domain | PF08062      | P12OR                     | 2.891908 | 0        | 2.198034017 | NOP2                               | NOP2                                          |
| 583 | Domain | IPR027388    | Ku70_bridges/pillars_dom  | 2.891908 | 0        | 2.198034017 | XRCC5                              | XRCC5                                         |
| 584 | Domain | PF11531      | HnrNP_M                   | 2.891908 | 0        | 2.198034017 | HNRNPM                             | HNRNPM                                        |
| 585 | Domain | IPR004591    | Rfa1                      | 2.891908 | 0        | 2.198034017 | RPA1                               | RPA1                                          |
| 586 | Domain | IPR024193    | Ku80                      | 2.891908 | 0        | 2.198034017 | XRCC5                              | XRCC5                                         |
| 587 | Domain | IPR007199    | Rep_factor-A_N            | 2.891908 | 0        | 2.198034017 | RPA1                               | RPA1                                          |
| 588 | Domain | 4.10.970.10  | -                         | 2.891908 | 0        | 2.198034017 | XRCC5                              | XRCC5                                         |
| 589 | Domain | PF17125      | Methyltr_RsmF_N           | 2.891908 | 0        | 2.198034017 | NOP2                               | NOP2                                          |
| 590 | Domain | PF16900      | REPA_OB_2                 | 2.891908 | 0        | 2.198034017 | RPA1                               | RPA1                                          |
| 591 | Domain | IPR024667    | HnrNP_M                   | 2.891908 | 0        | 2.198034017 | HNRNPM                             | HNRNPM                                        |
| 592 | Domain | PF03939      | Ribosomal_L23eN           | 2.891908 | 0        | 2.198034017 | RPL23A                             | RPL23A                                        |
| 593 | Domain | PF04657      | Rep-A_N                   | 2.891908 | 0        | 2.198034017 | RPA1                               | RPA1                                          |
| 594 | Domain | 1.25.40.240  | -                         | 2.891908 | 0        | 2.198034017 | XRCC5                              | XRCC5                                         |
| 595 | Domain | IPR024666    | HnrNP_M_PY-NLS            | 2.891908 | 0        | 2.198034017 | HNRNPM                             | HNRNPM                                        |
| 596 | Domain | IPR019985    | Ribosomal_L23             | 2.891908 | 0        | 2.198034017 | RPL23A                             | RPL23A                                        |
| 597 | Domain | IPR005633    | Ribosomal_L23/L25_N       | 2.891908 | 0        | 2.198034017 | RPL23A                             | RPL23A                                        |
| 598 | Domain | PF08785      | Ku_PK_bind                | 2.891908 | 0        | 2.198034017 | XRCC5                              | XRCC5                                         |
| 599 | Domain | IPR012586    | P12OR_rpt                 | 2.891908 | 0        | 2.198034017 | NOP2                               | NOP2                                          |
| 600 | Domain | PS00046      | HISTONE_H2A               | 0        | 0        | 5.084176566 |                                    | H2AFV,HIST1H2AA,HIST2HAB,HIST1H2AD            |
| 601 | Domain | IPR027417    | P-loop_NTPase             | 3.246154 | 0        | 1.799464892 | BMSL_DDX24,DHX15,DHX30,HNRNPU,KF11 |                                               |
| 602 | Domain | IPR002119    | Histone_H2A               | 0        | 0        | 4.918279572 |                                    | H2AFV,HIST1H2AA,HIST2HAB,HIST1H2AD            |
| 603 | Domain | SMO0414      | H2A                       | 0        | 0        | 4.918279572 |                                    | H2AFV,HIST1H2AA,HIST2HAB,HIST1H2AD            |
| 604 | Domain | SMO0360      | RRM                       | 1.506125 | 0        | 3.345455152 | HNRNPU,HNRNP                       | HNRNPU,HNRNP                                  |
| 605 | Domain | PF00467      | KOW                       | 0        | 2.028879 | 2.680991622 |                                    | RPL26L1,RPS4X                                 |
| 606 | Domain | IPR005824    | KOW                       | 0        | 2.028879 | 2.680991622 |                                    | RPL26L1,RPS4X                                 |
| 607 | Domain | PF08154      | NLE                       | 0        | 2.767677 | 1.901091444 |                                    | WDR12                                         |
| 608 | Domain | IPR012972    | NLE                       | 0        | 2.767677 | 1.901091444 |                                    | WDR12                                         |
| 609 | Domain | IPR013025    | Ribosomal_L25/23          | 2.591679 | 0        | 1.901091444 | RPL23A                             | RPL23A                                        |
| 610 | Domain | IPR018314    | FmytNOL/Nop2p_CS          | 2.591679 | 0        | 1.901091444 | NOP2                               | NOP2                                          |
| 611 | Domain | IPR013955    | Rep_factor-A_C            | 2.591679 | 0        | 1.901091444 | RPA1                               | RPA1                                          |
| 612 | Domain | PF08646      | Rep_fac-A_C               | 2.591679 | 0        | 1.901091444 | RPA1                               | RPA1                                          |
| 613 | Domain | PF00276      | Ribosomal_L23             | 2.591679 | 0        | 1.901091444 | RPL23A                             | RPL23A                                        |
| 614 | Domain | PF01336      | tRNA_anti-codon           | 1.816192 | 0        | 2.603599154 | RPA1                               | RPA1,RPA2                                     |
| 615 | Domain | IPR004865    | HA-nd_Ob_VRNA             | 1.816192 | 0        | 2.603599154 | RPA1                               | RPA1,RPA2                                     |
| 616 | Domain | IPR027534    | Ribosomal_L12             | 0        | 0        | 4.402502143 |                                    | RPLP1,RPLP2                                   |
| 617 | Domain | IPR001197    | Ribosomal_L10e            | 0        | 0        | 4.402502143 |                                    | RPL10,RPL10L                                  |
| 618 | Domain | PS01257      | RIBOSOMAL_L10E            | 0        | 0        | 4.402502143 |                                    | RPL10,RPL10L                                  |
| 619 | Domain | IPR005990    | IMP_DH                    | 0        | 0        | 4.402502143 |                                    | IMPDH1,IMPDH2                                 |
| 620 | Domain | IPR018255    | Ribosomal_L10e_CS         | 0        | 0        | 4.402502143 |                                    | RPL10,RPL10L                                  |
| 621 | Domain | PF00076      | RRM_1                     | 1.539982 | 0        | 2.68858831  | HNRNPU,HNRNP                       | HNRNPU,HNRNP                                  |
| 622 | Domain | IPR012996    | Znf_CHHC                  | 2.415855 | 0        | 1.726365584 | HNRNPH1                            | HNRNPH1                                       |
| 623 | Domain | PF08080      | zR-RNP                    | 2.415855 | 0        | 1.726365584 | HNRNPH1                            | HNRNPH1                                       |
| 624 | Domain | 1.10.20.10   | -                         | 0        | 0        | 4.123930853 |                                    | H2AFV,HIST1H2AA,HIST1H2AD,HIST1H2AB,HIST1H2AC |
| 625 | Domain | 2.30.30.30   | -                         | 0        | 1.816215 | 2.249166037 |                                    | RPL26L1,RPL8                                  |
| 626 | Domain | IPR014722    | Rib_L2_dom2               | 0        | 1.816215 | 2.249166037 |                                    | RPL26L1,RPL8                                  |
| 627 | Domain | IPR001609    | Myosin_head_motor_dom     | 0        | 0        | 4.028984382 |                                    | MYH10,MYH11,MYO15A,MYO1C                      |
| 628 | Domain | SMO0242      | MYSC                      | 0        | 0        | 4.028984382 |                                    | MYH10,MYH11,MYO15A,MYO1C                      |
| 629 | Domain | PF00663      | Myosin_head               | 0        | 0        | 4.028984382 |                                    | MYH10,MYH11,MYO15A,MYO1C                      |
| 630 | Domain | PS51456      | MYOSIN_MOTOR              | 0        | 0        | 4.028984382 |                                    | MYH10,MYH11,MYO15A,MYO1C                      |
| 631 | Domain | IPR032458    | Histone_H2A_CS            | 0        | 0        | 3.979370397 |                                    | H2AFV,HIST1H2AA,HIST1H2AD                     |
| 632 | Domain | IPR016180    | Ribosomal_L10e/L16        | 0        | 0        | 3.929886056 |                                    | RPL10,RPL10L                                  |
| 633 | Domain | 3.90.1170.10 | -                         | 0        | 0        | 3.929886056 |                                    | RPL10,RPL10L                                  |
| 634 | Domain | PF00252      | Ribosomal_L16             | 0        | 0        | 3.929886056 |                                    | RPL10,RPL10L                                  |
| 635 | Domain | IPR010979    | Ribosomal_S13-like_H2TH   | 0        | 2.370259 | 1.507226564 |                                    | RP518                                         |
| 636 | Domain | IPR000558    | Histone_H2B               | 0        | 1.749789 | 2.116983563 |                                    | HIST1H2B,HIST2H2B                             |
| 637 | Domain | PS00357      | HISTONE_H2B               | 0        | 1.749789 | 2.116983563 |                                    | HIST1H2B,HIST2H2B                             |
| 638 | Domain | SMO0427      | H2B                       | 0        | 1.749789 | 2.116983563 |                                    | HIST1H2B,HIST2H2B                             |
| 639 | Domain | IPR032454    | Histone_H2A_C             | 0        | 0        | 3.808868009 |                                    | H2AFV,HIST1H2AA,HIST1H2AD                     |
| 640 | Domain | PF16211      | Histone_H2A_C             | 0        | 0        | 3.808868009 |                                    | H2AFV,HIST1H2AA,HIST1H2AD                     |
| 641 | Domain | IPR015875    | IMP_DH/GMP_Rdtase_CS      | 0        | 0        | 3.630657336 |                                    | IMPDH1,IMPDH2                                 |
| 642 | Domain | PF00478      | IMPDH                     | 0        | 0        | 3.630657336 |                                    | IMPDH1,IMPDH2                                 |
| 643 | Domain | PS00487      | IMP_DH_GMP_RED            | 0        | 0        | 3.630657336 |                                    | IMPDH1,IMPDH2                                 |
| 644 | Domain | IPR001093    | IMP_DH_GMPRI              | 0        | 0        | 3.630657336 |                                    | IMPDH1,IMPDH2                                 |
| 645 | Domain | 1.10.720.30  | -                         | 3.487585 | 0        | 0           | HNRNPU,XRCC5                       |                                               |
| 646 | Domain | PF02037      | SAP                       | 3.446533 | 0        | 0           | HNRNPU,XRCC5                       |                                               |
| 647 | Domain | IPR000795    | TF_GTP-bd_dom             | 1.618482 | 1.792908 | 0           | BMSL                               | EEF1A2                                        |
| 648 | Domain | IPR008989    | Myosin_SL_N               | 0        | 0        | 3.41060344  |                                    | MYH10,MYH11                                   |
| 649 | Domain | SMO0513      | SAP                       | 3.407364 | 0        | 0           | HNRNPU,XRCC5                       |                                               |
| 650 | Domain | IPR003034    | SAP                       | 3.334042 | 0        | 0           | HNRNPU,XRCC5                       |                                               |
| 651 | Domain | PS50800      | SAP_dom                   | 3.334042 | 0        | 0           | HNRNPU,XRCC5                       |                                               |
| 652 | Domain | IPR005004    | RRM4_dom                  | 0        | 0        | 3.228902647 |                                    |                                               |
| 653 | Domain | PS50102      | RRM                       | 0        | 0        | 3.195215987 |                                    |                                               |
| 654 | Domain | IPR000509    | Ribosomal_L36e            | 0        | 3.068186 | 0           |                                    | RPL36                                         |
| 655 | Domain | IPR018282    | Ribosomal_S6e_CS          | 0        | 3.068186 | 0           |                                    | RP56                                          |
| 656 | Domain | IPR012987    | RCK_N                     | 0        | 3.068186 | 0           |                                    | HNRNPK                                        |
| 657 | Domain | SMO1405      | Ribosomal_S6e             | 0        | 3.068186 | 0           |                                    | RP56                                          |
| 658 | Domain | P0006052     | Ribosomal_S24e            | 0        | 3.068186 | 0           |                                    | RP524                                         |
| 659 | Domain | PF01158      | Ribosomal_L36e            | 0        | 3.068186 | 0           |                                    | RPL36                                         |
| 660 | Domain | IPR033090    | HnrNP_P                   | 0        | 3.068186 | 0           |                                    | HNRNPK                                        |
| 661 | Domain | PS01190      | RIBOSOMAL_L36E            | 0        | 3.068186 | 0           |                                    | RPL36                                         |
| 662 | Domain | PS00529      | RIBOSOMAL_S24E            | 0        | 3.068186 | 0           |                                    | RP524                                         |
| 663 | Domain | IPR001976    | Ribosomal_S24e            | 0        | 3.068186 | 0           |                                    | RP524                                         |
| 664 | Domain | PF01092      | Ribosomal_S6e             | 0        | 3.068186 | 0           |                                    | RP56                                          |
| 665 | Domain | PS00578      | RIBOSOMAL_S6E             | 0        | 3.068186 | 0           |                                    | RP56                                          |
| 666 | Domain | PF01282      | Ribosomal_S24e            | 0        | 3.068186 | 0           |                                    | RP524                                         |
| 667 | Domain | IPR014401    | Ribosomal_S6_euk          | 0        |          |             |                                    |                                               |

|     |        |              |                                |          |             |             |                               |                          |
|-----|--------|--------------|--------------------------------|----------|-------------|-------------|-------------------------------|--------------------------|
| 676 | Domain | IPR001854    | Ribosomal_L29                  | 2.891908 | 0           | 0           | RPL35                         |                          |
| 677 | Domain | IPR026532    | BRX1                           | 2.891908 | 0           | 0           | BRX1                          |                          |
| 678 | Domain | IPR014891    | DWNAU_domain                   | 2.891908 | 0           | 0           | RBP86                         |                          |
| 679 | Domain | P116577      | UBA_5                          | 2.891908 | 0           | 0           | SCOTM1                        |                          |
| 680 | Domain | IPR033489    | RBP86                          | 2.891908 | 0           | 0           | RBP86                         |                          |
| 681 | Domain | P03813       | Nrap                           | 2.891908 | 0           | 0           | NOL6                          |                          |
| 682 | Domain | SM01180      | DWNN                           | 2.891908 | 0           | 0           | RBP86                         |                          |
| 683 | Domain | IPR026745    | hHRNP_U                        | 2.891908 | 0           | 0           | HNRNPU                        |                          |
| 684 | Domain | IPR033640    | Galectin_7                     | 2.891908 | 0           | 0           | LGALS7                        |                          |
| 685 | Domain | P00831       | Ribosomal_L29                  | 2.891908 | 0           | 0           | RPL35                         |                          |
| 686 | Domain | P551282      | DWNN                           | 2.891908 | 0           | 0           | RBP86                         |                          |
| 687 | Domain | P113931      | Microtub_bind                  | 2.891908 | 0           | 0           | KIF11                         |                          |
| 688 | Domain | IPR018254    | Ribosomal_L29_CS               | 2.891908 | 0           | 0           | RPL35                         |                          |
| 689 | Domain | IPR025901    | Kinesin-assoc MT-bd dom        | 2.891908 | 0           | 0           | KIF11                         |                          |
| 690 | Domain | P500579      | RIBOSOMAL_L29                  | 2.891908 | 0           | 0           | RPL35                         |                          |
| 691 | Domain | IPR04539     | Transl_elong_EF1A_euk/arc      | 0        | 2.766777    | 0           | EEF1A2                        |                          |
| 692 | Domain | SM00015      | IQ                             | 0        | 0           | 2.766352987 |                               | MYH10,MYH11,MYO15A,MYO1C |
| 693 | Domain | P011248      | Ribosomal_L7Ae                 | 0        | 0           | 2.680991622 |                               | RPL30,RPL7A              |
| 694 | Domain | 3.40.50.300  | -                              | 2.64838  | 0           | 0           | BMS1,DDX24,DHX15,DHX30,HNRNPU |                          |
| 695 | Domain | IPR004038    | Ribosomal_L7Ae/L30e/S12e/Gad45 | 0        | 0           | 2.603599154 |                               | RPL30,RPL7A              |
| 696 | Domain | IPR000048    | IC2_nuclel_EF-hand-B5          | 0        | 0           | 2.598829485 |                               | MYH10,MYH11,MYO15A,MYO1C |
| 697 | Domain | P500302      | IFSA_HYPUSINE                  | 0        | 2.59176     | 0           |                               | EFSA                     |
| 698 | Domain | IPR020189    | Transl_elong_IFSA_C            | 0        | 2.59176     | 0           |                               | EFSA                     |
| 699 | Domain | SM01376      | eIF-5a                         | 0        | 2.59176     | 0           |                               | EFSA                     |
| 700 | Domain | P01287       | eIF-5a                         | 0        | 2.59176     | 0           |                               | EFSA                     |
| 701 | Domain | P03075       | NOPS                           | 0        | 2.59176     | 0           |                               | SFPQ                     |
| 702 | Domain | IPR012975    | NOPS                           | 0        | 2.59176     | 0           |                               | SFPQ                     |
| 703 | Domain | IPR019769    | Trans_elong_IFSA_hypusine_site | 0        | 2.59176     | 0           |                               | EFSA                     |
| 704 | Domain | IPR001884    | Transl_elong_IFSA              | 0        | 2.59176     | 0           |                               | EFSA                     |
| 705 | Domain | P008142      | AARF2CN                        | 2.591679 | 0           | 0           | BMS1                          |                          |
| 706 | Domain | P040550      | RIBOP_C                        | 2.591679 | 0           | 0           | BMS1                          |                          |
| 707 | Domain | IPR007034    | BMS1_TSR1_C                    | 2.591679 | 0           | 0           | BMS1                          |                          |
| 708 | Domain | SM01362      | DUF663                         | 2.591679 | 0           | 0           | BMS1                          |                          |
| 709 | Domain | P113696      | JF_CCHC_2                      | 2.591679 | 0           | 0           | RBP86                         |                          |
| 710 | Domain | IPR025829    | Zn_benuclel_C2C3GHX4C          | 2.591679 | 0           | 0           | RBP86                         |                          |
| 711 | Domain | P551714      | G_BMS1                         | 2.591679 | 0           | 0           | BMS1                          |                          |
| 712 | Domain | SM00785      | AARF2CN                        | 2.591679 | 0           | 0           | BMS1                          |                          |
| 713 | Domain | IPR012948    | AARF2CN                        | 2.591679 | 0           | 0           | BMS1                          |                          |
| 714 | Domain | IPR030387    | G_Bms1/Tsr1 dom                | 2.591679 | 0           | 0           | BMS1                          |                          |
| 715 | Domain | P550296      | IQ                             | 0        | 2.547173722 | 0           |                               | MYH10,MYH11,MYO15A,MYO1C |
| 716 | Domain | P131405      | EF-hand_6                      | 0        | 0           | 2.532836395 |                               | MYL6,MYL9                |
| 717 | Domain | IPR013825    | Topo_Ia_cen_sub2               | 2.415855 | 0           | 0           | RBP86                         |                          |
| 718 | Domain | P02736       | Myosin_N                       | 0        | 0           | 2.407314904 |                               | MYH10,MYH11              |
| 719 | Domain | IPR040409    | Myosin_N                       | 0        | 0           | 2.407314904 |                               | MYH10,MYH11              |
| 720 | Domain | 3.30.1330.30 | -                              | 0        | 0           | 2.407314904 |                               | RPL30,RPL7A              |
| 721 | Domain | IPR029064    | L30e-like                      | 0        | 0           | 2.407314904 |                               | RPL30,RPL7A              |
| 722 | Domain | 3.40.50.410  | -                              | 2.396261 | 0           | 0           | XRCC5,XRCC6                   |                          |
| 723 | Domain | SM00116      | CBS                            | 0        | 0           | 2.351108252 |                               | IMPDH1,IMPDH2            |
| 724 | Domain | IPR029238    | Myosin_tail                    | 0        | 0           | 2.249166037 |                               | MYH10,MYH11              |
| 725 | Domain | P01576       | Myosin_tail_1                  | 0        | 0           | 2.249166037 |                               | MYH10,MYH11              |
| 726 | Domain | IPR027401    | Myosin-like_IQ_dom             | 0        | 0           | 2.20264403  |                               | MYH10,MYH11              |
| 727 | Domain | IPR001163    | LSM_dom_euk/arc                | 0        | 0           | 2.20264403  |                               | SNRPD3,SNRPE             |
| 728 | Domain | 4.10.270.10  | -                              | 0        | 0           | 2.20264403  |                               | MYH10,MYH11              |
| 729 | Domain | SM00651      | Sm                             | 0        | 0           | 2.20264403  |                               | SNRPD3,SNRPE             |
| 730 | Domain | SM00358      | DSRM                           | 0        | 0           | 2.20264403  |                               | ILF3,STAU2               |
| 731 | Domain | P01423       | LSM                            | 0        | 0           | 2.20264403  |                               | SNRPD3,SNRPE             |
| 732 | Domain | P08701       | CSN1_Gm1                       | 0        | 0           | 2.198034017 |                               | GNL3                     |
| 733 | Domain | IPR020818    | Chaperonin_GroES               | 0        | 0           | 2.198034017 |                               | HSPE1                    |
| 734 | Domain | P00203       | Ribosomal_S19                  | 0        | 0           | 2.198034017 |                               | RPS15                    |
| 735 | Domain | IPR025607    | Rbm1_L5e/L18P_C                | 0        | 0           | 2.198034017 |                               | RPL5                     |
| 736 | Domain | P500939      | RIBOSOMAL_L1E                  | 0        | 0           | 2.198034017 |                               | RPL4                     |
| 737 | Domain | IPR030133    | RIMM3                          | 0        | 0           | 2.198034017 |                               | TMC303                   |
| 738 | Domain | P117004      | SRP_TPR_like                   | 0        | 0           | 2.198034017 |                               | SRP72                    |
| 739 | Domain | P113339      | JAATF-Che1                     | 0        | 0           | 2.198034017 |                               | AATF                     |
| 740 | Domain | IPR013000    | Ribosomal_L4/L1e_euk/arc_CS    | 0        | 0           | 2.198034017 |                               | RPL4                     |
| 741 | Domain | P501171      | RIBOSOMAL_L21E                 | 0        | 0           | 2.198034017 |                               | RPL21                    |
| 742 | Domain | IPR000231    | Ribosomal_L30e                 | 0        | 0           | 2.198034017 |                               | RPL30                    |
| 743 | Domain | P05179       | CDCT3_C                        | 0        | 0           | 2.198034017 |                               | CDCT3                    |
| 744 | Domain | P05890       | Ebp2                           | 0        | 0           | 2.198034017 |                               | EBNA1BP2                 |
| 745 | Domain | IPR007852    | Cdc73/Parafibromin             | 0        | 0           | 2.198034017 |                               | CDCT3                    |
| 746 | Domain | IPR005713    | Ribosomal_S19A/S15e            | 0        | 0           | 2.198034017 |                               | RPS15                    |
| 747 | Domain | P144204      | Ribosomal_L18_e                | 0        | 0           | 2.198034017 |                               | RPL5                     |
| 748 | Domain | P00166       | Cpn10                          | 0        | 0           | 2.198034017 |                               | HSPE1                    |
| 749 | Domain | IPR031545    | SRP_TPR-like                   | 0        | 0           | 2.198034017 |                               | SRP72                    |
| 750 | Domain | IPR013970    | Rfa2                           | 0        | 0           | 2.198034017 |                               | RP43                     |
| 751 | Domain | P110180      | DUF2373                        | 0        | 0           | 2.198034017 |                               | C7orf50                  |
| 752 | Domain | IPR018369    | Chaperonin_Cpn10_CS            | 0        | 0           | 2.198034017 |                               | HSPE1                    |
| 753 | Domain | IPR025755    | Ribos L4 C dom                 | 0        | 0           | 2.198034017 |                               | RPL4                     |
| 754 | Domain | IPR011344    | ssDNA-bd                       | 0        | 0           | 2.198034017 |                               | SSBP1                    |
| 755 | Domain | P500681      | CHAPERONINNS_CPN10             | 0        | 0           | 2.198034017 |                               | HSPE1                    |
| 756 | Domain | IPR023672    | Ribosomal_L2_euc               | 0        | 0           | 2.198034017 |                               | RPL8                     |
| 757 | Domain | IPR015974    | Ribosomal_L19/L19e dom3        | 0        | 0           | 2.198034017 |                               | RPL19                    |
| 758 | Domain | IPR002132    | Ribosomal_L5                   | 0        | 0           | 2.198034017 |                               | RPL11                    |
| 759 | Domain | IPR000969    | SSrcognition                   | 0        | 0           | 2.198034017 |                               | SSBP1                    |
| 760 | Domain | P114205      | Ribosomal_S17_N                | 0        | 0           | 2.198034017 |                               | RPS11                    |
| 761 | Domain | IPR024954    | SSRP1_dom                      | 0        | 0           | 2.198034017 |                               | SSBP1                    |
| 762 | Domain | P501104      | RIBOSOMAL_L13E                 | 0        | 0           | 2.198034017 |                               | RPL13                    |
| 763 | Domain | P011157      | Ribosomal_L21e                 | 0        | 0           | 2.198034017 |                               | RPL21                    |
| 764 | Domain | IPR012959    | CPL_dom                        | 0        | 0           | 2.198034017 |                               | PUM3                     |
| 765 | Domain | IPR031310    | Ribosomal_L5_N                 | 0        | 0           | 2.198034017 |                               | RPL11                    |
| 766 | Domain | P500323      | RIBOSOMAL_S19                  | 0        | 0           | 2.198034017 |                               | RPS15                    |
| 767 | Domain | IPR000424    | Primosome_Priv/ssb             | 0        | 0           | 2.198034017 |                               | SSBP1                    |
| 768 | Domain | P01280       | Ribosomal_L19e                 | 0        | 0           | 2.198034017 |                               | RPL19                    |
| 769 | Domain | IPR026258    | SRP8                           | 0        | 0           | 2.198034017 |                               | SRP8                     |
| 770 | Domain | IPR020929    | Ribosomal_L5_CS                | 0        | 0           | 2.198034017 |                               | RPL11                    |
| 771 | Domain | P02290       | SRP14                          | 0        | 0           | 2.198034017 |                               | SRP14                    |
| 772 | Domain | P08492       | SRP72                          | 0        | 0           | 2.198034017 |                               | SRP72                    |
| 773 | Domain | P08144       | CPL                            | 0        | 0           | 2.198034017 |                               | PUM3                     |
| 774 | Domain | IPR012606    | Ribosomal_S13/S15_N            | 0        | 0           | 2.198034017 |                               | RPS13                    |
| 775 | Domain | IPR013699    | Signal_recog_part_SRP72_RNA-bd | 0        | 0           | 2.198034017 |                               | SRP72                    |
| 776 | Domain | 1.10.1650.10 | -                              | 0        | 0           | 2.198034017 |                               | RPL19                    |
| 777 | Domain | IPR014813    | GNL3_N_dom                     | 0        | 0           | 2.198034017 |                               | GNL3                     |
| 778 | Domain | IPR001380    | Ribosomal_L13e                 | 0        | 0           | 2.198034017 |                               | RPL13                    |
| 779 | Domain | IPR033935    | Ribosomal_L19_euka             | 0        | 0           | 2.198034017 |                               | RPL19                    |
| 780 | Domain | IPR032041    | Cdc73_N                        | 0        | 0           | 2.198034017 |                               | CDCT3                    |
| 781 | Domain | IPR019327    | DUF2373                        | 0        | 0           | 2.198034017 |                               | C7orf50                  |
| 782 | Domain | IPR02671     | Ribosomal_L2_CS                | 0        | 0           | 2.198034017 |                               | RPL8                     |
| 783 | Domain | P500709      | RIBOSOMAL_L30E_1               | 0        | 0           | 2.198034017 |                               | RPL30                    |
| 784 | Domain | IPR026270    | SRP72                          | 0        | 0           | 2.198034017 |                               | SRP72                    |
| 785 | Domain | P01779       | Ribosomal_L29e                 | 0        | 0           | 2.198034017 |                               | RPL29                    |
| 786 | Domain | P00436       | SSB                            | 0        | 0           | 2.198034017 |                               | SSBP1                    |
| 787 | Domain | IPR028438    | Dydrin                         | 0        | 0           | 2.198034017 |                               | DBN1                     |
| 788 | Domain | IPR005755    | Ribosomal_L13_euk/arc          | 0        | 0           | 2.198034017 |                               | RPL13A                   |
| 789 | Domain | IPR022991    | Ribosomal_L30e_CS              | 0        | 0           | 2.198034017 |                               | RPL30                    |
| 790 | Domain | P500467      | RIBOSOMAL_L2                   | 0        | 0           | 2.198034017 |                               | RPL8                     |
| 791 | Domain | P550935      | SSB                            | 0        | 0           | 2.198034017 |                               | SSBP1                    |
| 792 | Domain | P501199      | RIBOSOMAL_L1                   | 0        | 0           | 2.198034017 |                               | RPL10A                   |
| 793 | Domain | P08661       | Rep_fac_A_3                    | 0        | 0           | 2.198034017 |                               | RP43                     |
| 794 | Domain | IPR023029    | Ribosomal_S15P                 | 0        | 0           | 2.198034017 |                               | RPS13                    |
| 795 | Domain | IPR023638    | Ribosomal_L19/L19e_CS          | 0        | 0           | 2.198034017 |                               | RPL19                    |
| 796 | Domain | P000281      | Ribosomal_L5                   | 0        | 0           | 2.198034017 |                               | RPL11                    |
| 797 | Domain | IPR018256    | Ribosomal_L13e_CS              | 0        | 0           | 2.198034017 |                               | RPL13                    |
| 798 | Domain | P116969      | SRP8                           | 0        | 0           | 2.198034017 |                               | SRP8                     |
| 799 | Domain | SM00654      | eIF6                           | 0        | 0           | 2.198034017 |                               | EIF6                     |
| 800 | Domain | P02330       | MAM33                          | 0        | 0           | 2.198034017 |                               | C1QBP                    |
| 801 | Domain | IPR028133    | Ribosomal_S17_arc-tyr          | 0        | 0           | 2.198034017 |                               | RPS11                    |
| 802 | Domain | IPR002769    | eIF6                           | 0        | 0           | 2.198034017 |                               | EIF6                     |
| 803 | Domain | P500358      | RIBOSOMAL_L5                   | 0        | 0           | 2.198034017 |                               | RPL11                    |
| 804 | Domain | IPR027078    | snRNP-E                        | 0        | 0           | 2.198034017 |                               | SNRPE                    |
| 805 | Domain | IPR019972    | Ribosomal_L14P_CS              | 0        | 0           | 2.198034017 |                               | RPL23                    |
| 806 | Domain | SM00883      | Cpn10                          | 0        | 0           | 2.198034017 |                               | HSPE1                    |
| 807 | Domain | IPR002673    | Ribosomal_L29e                 | 0        | 0           | 2.198034017 |                               | RPL29                    |
| 808 | Domain | 3.30.860.10  | -                              | 0        | 0           | 2.198034017 |                               | RPS15                    |
| 809 | Domain | P03531       | SSecrog                        | 0        | 0           | 2.198034017 |                               | SSBP1                    |
| 810 | Domain | IPR008610    | Ebp2                           | 0        | 0           | 2.198034017 |                               | EBNA1BP2                 |
| 811 | Domain | P011294      | Ribosomal_L13e                 | 0        | 0           | 2.198034017 |                               | RPL13                    |
| 812 | Domain | IPR031336    | CDCT3_C                        | 0        | 0           | 2.198034017 |                               | CDCT3                    |
| 813 | Domain | IPR028493    | S100A14                        | 0        | 0           | 2.198034017 |                               | S100A14                  |
| 814 | Domain | IPR03210     | Signal_recog_particle_SRP14    | 0        | 0           | 2.198034017 |                               | SRP14                    |
| 815 | Domain | IPR023673    | Ribosomal_L1_CS                | 0        | 0           | 2.198034017 |                               | RP43                     |
| 816 | Domain | IPR032440    | Ribosomal_S11_N                | 0        | 0           | 2.198034017 |                               | RPS11                    |
| 817 | Domain | SM01416      | Ribosomal_L19e                 | 0        | 0           | 2.198034017 |                               | RPL19                    |
| 818 | Domain | IPR001921    | Ribosomal_L7A/L8               | 0        | 0           | 2.198034017 |                               | RPL7A                    |
| 819 | Domain | 3.30.1440.10 | -                              | 0        | 0           | 2.198034017 |                               | RPL11                    |
| 820 | Domain | IPR000196    | Ribosomal_L19/L19e             | 0        | 0           | 2.198034017 |                               | RPL19                    |

|     |        |              |                               |          |          |             |               |
|-----|--------|--------------|-------------------------------|----------|----------|-------------|---------------|
| 821 | Domain | IPR031309    | Ribosomal_L5_C                | 0        | 0        | 2.198034017 | RPL11         |
| 822 | Domain | 2.30.33.40   | -                             | 0        | 0        | 2.198034017 | HSPE1         |
| 823 | Domain | PR08164      | TRAUB                         | 0        | 0        | 2.198034017 | AATF          |
| 824 | Domain | IPR022803    | Ribosomal_L5_domain           | 0        | 0        | 2.198034017 | RPL11         |
| 825 | Domain | IPR001147    | Ribosomal_L21e                | 0        | 0        | 2.198034017 | RPL21         |
| 826 | Domain | 2.30.30.70   | -                             | 0        | 0        | 2.198034017 | RPL21         |
| 827 | Domain | IPR02388     | AnneXinI                      | 0        | 0        | 2.198034017 | ANXA1         |
| 828 | Domain | IPR028806    | RBM46                         | 0        | 0        | 2.198034017 | RBM46         |
| 829 | Domain | IPR030499    | PURbeta                       | 0        | 0        | 2.198034017 | PURB          |
| 830 | Domain | IPR015972    | Ribosomal_L19/L19e_dom1       | 0        | 0        | 2.198034017 | RPL19         |
| 831 | Domain | PS00993      | RIBOSOMAL_L30E_2              | 0        | 0        | 2.198034017 | RPL30         |
| 832 | Domain | P117144      | Ribosomal_L5e                 | 0        | 0        | 2.198034017 | RPL5          |
| 833 | Domain | IPR033099    | ILF3/NTR9                     | 0        | 0        | 2.198034017 | ILF3          |
| 834 | Domain | PS00526      | RIBOSOMAL_L19E                | 0        | 0        | 2.198034017 | RPL19         |
| 835 | Domain | IPR018259    | Ribosomal_L21e_CS             | 0        | 0        | 2.198034017 | RPL21         |
| 836 | Domain | IPR023575    | Ribosomal_S19_SF              | 0        | 0        | 2.198034017 | RPS15         |
| 837 | Domain | 1.10.1200.60 | -                             | 0        | 0        | 2.198034017 | RPL19         |
| 838 | Domain | P0009170     | Signal recog particle SRP14   | 0        | 0        | 2.198034017 | SRP14         |
| 839 | Domain | IPR005485    | Rbsm1_L5_euk/L18_arc          | 0        | 0        | 2.198034017 | RPL5          |
| 840 | Domain | 3.10.280.10  | -                             | 0        | 0        | 2.198034017 | C1QBP         |
| 841 | Domain | IPR030670    | L19E_eukaryotes               | 0        | 0        | 2.198034017 | RPL19         |
| 842 | Domain | IPR032660    | AMT1                          | 0        | 0        | 2.198034017 | MVCBP         |
| 843 | Domain | IPR005680    | Ribosomal_S23_euk/arc         | 0        | 0        | 2.198034017 | RPS23         |
| 844 | Domain | P0010314     | Ribosomal_L29e                | 0        | 0        | 2.198034017 | RPL29         |
| 845 | Domain | PF00673      | Ribosomal_L5_C                | 0        | 0        | 2.198034017 | RPL11         |
| 846 | Domain | PF01912      | arf-4                         | 0        | 0        | 2.198034017 | EF6           |
| 847 | Domain | IPR025160    | AATF                          | 0        | 0        | 2.198034017 | AATF          |
| 848 | Domain | PF14374      | Ribos_L4_asso_C               | 0        | 0        | 2.198034017 | RPL4          |
| 849 | Domain | IPR020785    | Ribosomal_L11_C               | 0        | 0        | 2.198034017 | RPL12         |
| 850 | Domain | IPR012617    | AATF_C                        | 0        | 0        | 2.198034017 | AATF          |
| 851 | Domain | IPR020934    | Ribosomal_S19_CS              | 0        | 0        | 2.198034017 | RPS15         |
| 852 | Domain | PF16050      | CDC73_N                       | 0        | 0        | 2.198034017 | CDC73         |
| 853 | Domain | PF08069      | Ribosomal_S13_N               | 0        | 0        | 2.198034017 | RPS13         |
| 854 | Domain | IPR027089    | Mitofusin-2                   | 0        | 0        | 2.198034017 | MFN2          |
| 855 | Domain | SM01386      | Ribosomal_S13_N               | 0        | 0        | 2.198034017 | RPS13         |
| 856 | Domain | IPR019979    | Ribosomal_S17_CS              | 0        | 0        | 2.198034017 | RPS11         |
| 857 | Domain | PF04427      | Brix                          | 2.194539 | 0        | 0           | BRX1          |
| 858 | Domain | SM00879      | Brix                          | 2.194539 | 0        | 0           | BRX1          |
| 859 | Domain | IPR007109    | Brix                          | 2.194539 | 0        | 0           | BRX1          |
| 860 | Domain | PS00833      | Brix                          | 2.194539 | 0        | 0           | BRX1          |
| 861 | Domain | IPR004160    | Transl_elong_EFTU/EF1A_C      | 0        | 2.166661 | 0           | EEF1A2        |
| 862 | Domain | PF03143      | GTP_EFTU_D3                   | 0        | 2.166661 | 0           | EEF1A2        |
| 863 | Domain | PS51371      | CBS                           | 0        | 0        | 2.158668337 | IMPDH1,IMPDH2 |
| 864 | Domain | IPR000644    | CBS_dom                       | 0        | 0        | 2.158668337 | IMPDH1,IMPDH2 |
| 865 | Domain | 3.30.1330.20 | -                             | 0        | 0        | 2.158668337 | TUBAAA,TUBB1  |
| 866 | Domain | PF00571      | CBS                           | 0        | 0        | 2.158668337 | IMPDH1,IMPDH2 |
| 867 | Domain | IPR002035    | VWF_A                         | 2.150416 | 0        | 0           | XRCX5,XRCX6   |
| 868 | Domain | 1.10.287.600 | -                             | 0        | 0        | 2.116983563 | -             |
| 869 | Domain | IPR011157    | G_TR_CS                       | 0        | 2.115682 | 0           | EEF1A2        |
| 870 | Domain | SM01153      | NOL1_NOP2_SUN                 | 2.115624 | 0        | 0           | NOP2          |
| 871 | Domain | IPR023267    | RCMT                          | 2.115624 | 0        | 0           | NOP2          |
| 872 | Domain | IPR018316    | Tubulin/FtsZ_2-layer-sand-dom | 0        | 0        | 2.077370921 | TUBAAA,TUBB1  |
| 873 | Domain | IPR010920    | LSM_dom                       | 0        | 0        | 2.077370921 | SNRPO3,SNRPE  |
| 874 | Domain | PF039531     | Tubulin_C                     | 0        | 0        | 2.077370921 | TUBAAA,TUBB1  |
| 875 | Domain | SM00865      | Tubulin_C                     | 0        | 0        | 2.077370921 | TUBAAA,TUBB1  |
| 876 | Domain | 3.40.50.1440 | -                             | 0        | 0        | 2.077370921 | TUBAAA,TUBB1  |
| 877 | Domain | IPR009001    | Transl_elong_EF1A/hnt_IP2_C   | 0        | 2.070098 | 0           | EEF1A2        |
| 878 | Domain | PS11686      | SAM_MT_RSMB_NOP               | 2.048944 | 0        | 0           | NOP2          |
| 879 | Domain | IPR000217    | Tubulin                       | 0        | 0        | 2.039641544 | TUBAAA,TUBB1  |
| 880 | Domain | IPR017975    | Tubulin_CS                    | 0        | 0        | 2.039641544 | TUBAAA,TUBB1  |
| 881 | Domain | SM00864      | Tubulin                       | 0        | 0        | 2.039641544 | TUBAAA,TUBB1  |
| 882 | Domain | IPR031213    | Tubulin_C                     | 0        | 0        | 2.039641544 | TUBAAA,TUBB1  |
| 883 | Domain | IPR028280    | Tub_FtsZ_C                    | 0        | 0        | 2.039641544 | TUBAAA,TUBB1  |
| 884 | Domain | PS00227      | TUBULIN                       | 0        | 0        | 2.039641544 | TUBAAA,TUBB1  |
| 885 | Domain | PF00091      | Tubulin                       | 0        | 0        | 2.003631267 | TUBAAA,TUBB1  |
| 886 | Domain | IPR030208    | Tubulin_FtsZ_GTPase           | 0        | 0        | 2.003631267 | -             |
| 887 | Domain | IPR016178    | MetFase_RumB/NOP2             | 1.991218 | 0        | 0           | NOP2          |
| 888 | Domain | PF04564      | U-box                         | 1.991218 | 0        | 0           | RBBP6         |
| 889 | Domain | PF01189      | Methyltr_RumB-F               | 1.991218 | 0        | 0           | NOP2          |
| 890 | Domain | IPR005746    | Thioredoxin                   | 0        | 1.956676 | 0           | TXN           |
| 891 | Domain | PS00301      | U_TK_1                        | 0        | 1.956676 | 0           | EEF1A2        |
| 892 | Domain | IPR017884    | SANT_dom                      | 0        | 0        | 1.936210915 | NCOR1,SMARCA5 |
| 893 | Domain | 3.30.160.20  | -                             | 0        | 0        | 1.9045628   | ILF3,STAU2    |
| 894 | Domain | IPR015351    | LAG1_DNA-bd                   | 0        | 0        | 1.901091444 | RBP1          |
| 895 | Domain | IPR014646    | Rfa2/RPA32                    | 0        | 0        | 1.901091444 | RPA2          |
| 896 | Domain | PF03947      | Ribosomal_L2_C                | 0        | 0        | 1.901091444 | RPL8          |
| 897 | Domain | IPR004122    | BAF_prot                      | 0        | 0        | 1.901091444 | BANF1         |
| 898 | Domain | PS00049      | RIBOSOMAL_L14                 | 0        | 0        | 1.901091444 | RPL23         |
| 899 | Domain | PF09270      | BDT                           | 0        | 0        | 1.901091444 | RBP1          |
| 900 | Domain | IPR02669     | Ribosomal_L2_C                | 0        | 0        | 1.901091444 | RPL8          |
| 901 | Domain | PS003621     | RIBOSOMAL_S15                 | 0        | 0        | 1.901091444 | RPS13         |
| 902 | Domain | PS00359      | RIBOSOMAL_L11                 | 0        | 0        | 1.901091444 | RPL12         |
| 903 | Domain | IPR005822    | Ribosomal_L13                 | 0        | 0        | 1.901091444 | RPL13A        |
| 904 | Domain | P0019964     | P0019964                      | 0        | 0        | 1.901091444 | BANF1         |
| 905 | Domain | SM01023      | BAF                           | 0        | 0        | 1.901091444 | BANF1         |
| 906 | Domain | PF08152      | GUCT                          | 0        | 0        | 1.901091444 | DOX21         |
| 907 | Domain | IPR005998    | Ribosomal_L7_euk              | 0        | 0        | 1.901091444 | RPL7          |
| 908 | Domain | PF09111      | SLIDE                         | 0        | 0        | 1.901091444 | SMARCA5       |
| 909 | Domain | PF00572      | Ribosomal_L13                 | 0        | 0        | 1.901091444 | RPL13A        |
| 910 | Domain | 3.30.720.10  | -                             | 0        | 0        | 1.901091444 | SRP14         |
| 911 | Domain | IPR012956    | CARG-binding_factor_N         | 0        | 0        | 1.901091444 | HNRNP0        |
| 912 | Domain | SM01383      | Ribosomal_L2                  | 0        | 0        | 1.901091444 | RPL8          |
| 913 | Domain | PF00366      | Ribosomal_S17                 | 0        | 0        | 1.901091444 | RPS11         |
| 914 | Domain | IPR030878    | Ribosomal_L15                 | 0        | 0        | 1.901091444 | RPL27A        |
| 915 | Domain | PS01073      | RIBOSOMAL_L24E                | 0        | 0        | 1.901091444 | RPL24         |
| 916 | Domain | PS00475      | RIBOSOMAL_L15                 | 0        | 0        | 1.901091444 | RPL27A        |
| 917 | Domain | SM01387      | Ribosomal_S15                 | 0        | 0        | 1.901091444 | RPS13         |
| 918 | Domain | SM00649      | RL11                          | 0        | 0        | 1.901091444 | RPL12         |
| 919 | Domain | IPR009088    | Ribosomal_L24e-rel            | 0        | 0        | 1.901091444 | RPL24         |
| 920 | Domain | PF03946      | Ribosomal_L11_N               | 0        | 0        | 1.901091444 | RPL12         |
| 921 | Domain | SM01382      | Ribosomal_L2_C                | 0        | 0        | 1.901091444 | RPL8          |
| 922 | Domain | PF00181      | Ribosomal_L2                  | 0        | 0        | 1.901091444 | RPL8          |
| 923 | Domain | 4.10.950.10  | -                             | 0        | 0        | 1.901091444 | RPL8          |
| 924 | Domain | IPR027094    | Mitofusin_fam                 | 0        | 0        | 1.901091444 | MFN2          |
| 925 | Domain | IPR022666    | Rbsm1_prot_L2_RNA-bd_dom      | 0        | 0        | 1.901091444 | RPL8          |
| 926 | Domain | IPR012988    | Ribosomal_L30_N               | 0        | 0        | 1.901091444 | RPL7          |
| 927 | Domain | IPR000911    | Ribosomal_L11/L12             | 0        | 0        | 1.901091444 | RPL12         |
| 928 | Domain | 2.40.1370.10 | -                             | 0        | 0        | 1.901091444 | RPL4          |
| 929 | Domain | PF09271      | LAG1_DNAbind                  | 0        | 0        | 1.901091444 | RBP1          |
| 930 | Domain | PS00055      | RIBOSOMAL_S12                 | 0        | 0        | 1.901091444 | RPS23         |
| 931 | Domain | 3.30.1550.10 | -                             | 0        | 0        | 1.901091444 | RPL12         |
| 932 | Domain | PS00056      | RIBOSOMAL_S17                 | 0        | 0        | 1.901091444 | RPS11         |
| 933 | Domain | PF01246      | Ribosomal_L24e                | 0        | 0        | 1.901091444 | RPL24         |
| 934 | Domain | IPR006884    | Fzo/mitofusin_HR2             | 0        | 0        | 1.901091444 | MFN2          |
| 935 | Domain | IPR017179    | DUF1747                       | 0        | 0        | 1.901091444 | SSRP1         |
| 936 | Domain | IPR015350    | Beta-trefoil_DNA-bd_dom       | 0        | 0        | 1.901091444 | RBP1          |
| 937 | Domain | PF00338      | Ribosomal_L14                 | 0        | 0        | 1.901091444 | RPL23         |
| 938 | Domain | 2.40.150.20  | -                             | 0        | 0        | 1.901091444 | RBP1          |
| 939 | Domain | SM01268      | BDT                           | 0        | 0        | 1.901091444 | RBP1          |
| 940 | Domain | IPR020784    | Ribosomal_L11_N               | 0        | 0        | 1.901091444 | RPL12         |
| 941 | Domain | P0001295     | Ribosomal_S17                 | 0        | 0        | 1.901091444 | RPS11         |
| 942 | Domain | PS00634      | RIBOSOMAL_L30                 | 0        | 0        | 1.901091444 | RPL7          |
| 943 | Domain | 1.10.150.40  | -                             | 0        | 0        | 1.901091444 | BANF1         |
| 944 | Domain | IPR001196    | Ribosomal_L15_CS              | 0        | 0        | 1.901091444 | RPL27A        |
| 945 | Domain | 3.90.1180.10 | -                             | 0        | 0        | 1.901091444 | RPL13A        |
| 946 | Domain | 2.60.40.1450 | -                             | 0        | 0        | 1.901091444 | RBP1          |
| 947 | Domain | IPR031557    | N-CoR_GPS2_interact           | 0        | 0        | 1.901091444 | NCOR1         |
| 948 | Domain | IPR014726    | Ribosomal_L2_dom3             | 0        | 0        | 1.901091444 | RPL8          |
| 949 | Domain | IPR020783    | Ribosomal_L11_C               | 0        | 0        | 1.901091444 | RPL12         |
| 950 | Domain | PF16806      | Ribosomal_L26                 | 0        | 0        | 1.901091444 | RPL26L1       |
| 951 | Domain | IPR00298     | Ribosomal_L11                 | 0        | 0        | 1.901091444 | RPL12         |
| 952 | Domain | IPR023442    | Ribosomal_L24e_CS             | 0        | 0        | 1.901091444 | RPL24         |
| 953 | Domain | IPR029915    | ISWI                          | 0        | 0        | 1.901091444 | SMARCA5       |
| 954 | Domain | 2.30.170.20  | -                             | 0        | 0        | 1.901091444 | RPL24         |
| 955 | Domain | IPR030428    | MANA33                        | 0        | 0        | 1.901091444 | C1QBP         |
| 956 | Domain | IPR023574    | Ribosomal_L4_dom              | 0        | 0        | 1.901091444 | RPL4          |
| 957 | Domain | PF08079      | Ribosomal_L30_N               | 0        | 0        | 1.901091444 | RPL7          |
| 958 | Domain | IPR015194    | ISWI_HAND-dom                 | 0        | 0        | 1.901091444 | SMARCA5       |
| 959 | Domain | PF09110      | HAND                          | 0        | 0        | 1.901091444 | SMARCA5       |
| 960 | Domain | PF08143      | CBPNT                         | 0        | 0        | 1.901091444 | HNRNP0        |
| 961 | Domain | IPR012562    | GUCT                          | 0        | 0        | 1.901091444 | DOX21         |
| 962 | Domain | IPR006032    | Ribosomal_S12/S23             | 0        | 0        | 1.901091444 | RPS23         |
| 963 | Domain | IPR022222    | Ribosomal_S19                 | 0        | 0        | 1.901091444 | RPS15         |
| 964 | Domain | PF00312      | Ribosomal_S15                 | 0        | 0        | 1.901091444 | RPS13         |
| 965 | Domain | 3.40.50.790  | -                             | 0        | 0        | 1.901091444 | RPL10A        |

|      |        |              |                               |          |          |             |               |        |                                |
|------|--------|--------------|-------------------------------|----------|----------|-------------|---------------|--------|--------------------------------|
| 966  | Domain | PF08512      | RT106                         | 0        | 0        | 1.901091444 |               |        | SSRP1                          |
| 967  | Domain | IPR023563    | Ribosomal_L13_CS              | 0        | 0        | 1.901091444 |               |        | RPL13A                         |
| 968  | Domain | PF05573      | Ribosomal_L4                  | 0        | 0        | 1.901091444 |               |        | RPL4                           |
| 969  | Domain | SM01374      | Ribosomal_L14                 | 0        | 0        | 1.901091444 |               |        | RPL23                          |
| 970  | Domain | IPR000589    | Ribosomal_S15                 | 0        | 0        | 1.901091444 |               |        | RPS13                          |
| 971  | Domain | SM01287      | RT106                         | 0        | 0        | 1.901091444 |               |        | SSRP1                          |
| 972  | Domain | SM01267      | LAG1_DNAbind                  | 0        | 0        | 1.901091444 |               |        | RBP1                           |
| 973  | Domain | IPR054884    | Ribosomal_L18                 | 0        | 0        | 1.901091444 |               |        | RPL5                           |
| 974  | Domain | IPR002136    | Ribosomal_L4/L1e              | 0        | 0        | 1.901091444 |               |        | RPL4                           |
| 975  | Domain | PF04799      | Fzo_mitofusin                 | 0        | 0        | 1.901091444 |               |        | MFN2                           |
| 976  | Domain | IPR015195    | SLIDE                         | 0        | 0        | 1.901091444 |               |        | SMARCA5                        |
| 977  | Domain | IPR014892    | RPA_C                         | 0        | 0        | 1.901091444 |               |        | RPA2                           |
| 978  | Domain | IPR018038    | Ribosomal_L30_CS              | 0        | 0        | 1.901091444 |               |        | RPL7                           |
| 979  | Domain | IPR005756    | Ribosomal_L26/L24P_euk/arc    | 0        | 0        | 1.901091444 |               |        | RPL26L1                        |
| 980  | Domain | IPR000266    | Ribosomal_S17/S11             | 0        | 0        | 1.901091444 |               |        | RPS11                          |
| 981  | Domain | PF15784      | GPS2_interact                 | 0        | 0        | 1.901091444 |               |        | NCOR1                          |
| 982  | Domain | IPR000218    | Ribosomal_L14P                | 0        | 0        | 1.901091444 |               |        | RPL23                          |
| 983  | Domain | IPR002171    | Ribosomal_L2                  | 0        | 0        | 1.901091444 |               |        | RPL8                           |
| 984  | Domain | PF08784      | RPA_C                         | 0        | 0        | 1.901091444 |               |        | RPA2                           |
| 985  | Domain | 1.10.10.250  | -                             | 0        | 0        | 1.901091444 |               |        | RPL12                          |
| 986  | Domain | PS00783      | RIBOSOMAL_L13                 | 0        | 0        | 1.901091444 |               |        | RPL13A                         |
| 987  | Domain | PF00861      | Ribosomal_L18p                | 0        | 0        | 1.901091444 |               |        | RPL5                           |
| 988  | Domain | PF00164      | Ribosomal_S12_S23             | 0        | 0        | 1.901091444 |               |        | RPS23                          |
| 989  | Domain | PF02961      | BAF                           | 0        | 0        | 1.901091444 |               |        | BANF1                          |
| 990  | Domain | IPR003613    | Ubex_domain                   | 1.894841 | 0        |             | RBBP6         |        |                                |
| 991  | Domain | PSS1293      | SANT                          | 0        | 0        | 1.874152871 |               |        | NCOR1,SMARCA5                  |
| 992  | Domain | IPR014720    | dsRBD_dom                     | 0        | 0        | 1.874152874 |               |        | IEF3,STAU2                     |
| 993  | Domain | PF00956      | NAP                           | 0        | 1.840865 | 0           |               | NAP1L1 |                                |
| 994  | Domain | IPR002164    | NAP_family                    | 0        | 1.840865 | 0           |               | NAP1L1 |                                |
| 995  | Domain | IPR017937    | Thioredoxin_CS                | 0        | 1.840865 | 0           |               | TXN    |                                |
| 996  | Domain | IPR041611    | EF-Tu_kin_2                   | 0        | 1.816215 | 0           |               | EEF1A2 |                                |
| 997  | Domain | PF03144      | GTP_EFTU_D2                   | 0        | 1.816215 | 0           |               | EEF1A2 |                                |
| 998  | Domain | PSS1722      | G_TR_2                        | 0        | 1.816215 | 0           |               | EEF1A2 |                                |
| 999  | Domain | PSS0222      | EF_HAND_2                     | 0        | 0        | 1.809375253 |               |        | MYL12A,MYL6,MYL6B,MYL9,S100A14 |
| 1000 | Domain | PF00036      | EF-hand_1                     | 0        | 0        | 1.805101106 |               |        | MYL12A,MYL6,MYL6B,MYL9         |
| 1001 | Domain | IPR002048    | EF_hand_dom                   | 0        | 0        | 1.802042527 |               |        | MYL12A,MYL6,MYL6B,MYL9,S100A14 |
| 1002 | Domain | PS00039      | DEAD_ATP_HELICASE             | 0        | 0        | 1.789510684 |               |        | DDX21,DDX24                    |
| 1003 | Domain | IPR020472    | G-protein_beta_WD-40_rep      | 0        | 0        | 1.781251974 |               |        | GRWD1,PWP1,WRD12               |
| 1004 | Domain | IPR04154     | Anticodon-bd                  | 1.749778 | 0        | 0           | BRD1          |        |                                |
| 1005 | Domain | SM00666      | PB1                           | 1.749778 | 0        | 0           | SQSTM1        |        |                                |
| 1006 | Domain | PF00564      | PB1                           | 1.749778 | 0        | 0           | SQSTM1        |        |                                |
| 1007 | Domain | IPR000270    | PB1_dom                       | 1.749778 | 0        | 0           | SQSTM1        |        |                                |
| 1008 | Domain | PSS1745      | PB1                           | 1.749778 | 0        | 0           | SQSTM1        |        |                                |
| 1009 | Domain | SM00554      | EFH                           | 0        | 0        | 1.749506206 |               |        | MYL12A,MYL6,MYL6B,MYL9         |
| 1010 | Domain | IPR000629    | RNA-helicase_DEAD-box_CS      | 0        | 0        | 1.737871257 |               |        | DDX21,DDX24                    |
| 1011 | Domain | IPR013843    | Ribosomal_S4e_N               | 0        | 0        | 1.726365584 |               |        | RPS4X                          |
| 1012 | Domain | IPR016082    | Ribosomal_L30 ferredoxin-like | 0        | 0        | 1.726365584 |               |        | RPL7                           |
| 1013 | Domain | IPR01790     | Ribosomal_L10P                | 0        | 0        | 1.726365584 |               |        | RPLP0                          |
| 1014 | Domain | IPR018199    | Ribosomal_S4e_N_CS            | 0        | 0        | 1.726365584 |               |        | RPS4X                          |
| 1015 | Domain | PF02877      | PARP_reg                      | 0        | 0        | 1.726365584 |               |        | PARP2                          |
| 1016 | Domain | IPR032478    | Staufen_C                     | 0        | 0        | 1.726365584 |               |        | STAU2                          |
| 1017 | Domain | PD002667     | PD002667_S4e_central          | 0        | 0        | 1.726365584 |               |        | RPS4X                          |
| 1018 | Domain | PF00466      | Ribosomal_L30                 | 0        | 0        | 1.726365584 |               |        | RPLP0                          |
| 1019 | Domain | PF00297      | Ribosomal_L1                  | 0        | 0        | 1.726365584 |               |        | RPL3                           |
| 1020 | Domain | PS00528      | RIBOSOMAL_S4E                 | 0        | 0        | 1.726365584 |               |        | RPS4X                          |
| 1021 | Domain | IPR009018    | Signal_recog_particle_SRP9/14 | 0        | 0        | 1.726365584 |               |        | SRP14                          |
| 1022 | Domain | IPR000597    | Ribosomal_L3                  | 0        | 0        | 1.726365584 |               |        | RPL3                           |
| 1023 | Domain | IPR022052    | -                             | 0        | 0        | 1.726365584 |               |        | GRWD1                          |
| 1024 | Domain | 3.30.1390.20 | Histone-bd_RBBP4_N            | 0        | 0        | 1.726365584 |               |        | RPL7                           |
| 1025 | Domain | PSS0303      | PUM_HD                        | 0        | 0        | 1.726365584 |               |        | PUM3                           |
| 1026 | Domain | PF13892      | DBINO                         | 0        | 0        | 1.726365584 |               |        | SMARCA5                        |
| 1027 | Domain | PF08976      | EF-hand_11                    | 0        | 0        | 1.726365584 |               |        | MYL12A                         |
| 1028 | Domain | IPR016094    | Ribosomal_L1_2-a/b-sand       | 0        | 0        | 1.726365584 |               |        | RPL10A                         |
| 1029 | Domain | IPR021131    | Ribosomal_L18e/L15P           | 0        | 0        | 1.726365584 |               |        | RPL27A                         |
| 1030 | Domain | IPR028364    | Ribosomal_L1/biogenesis       | 0        | 0        | 1.726365584 |               |        | RPL10A                         |
| 1031 | Domain | IPR05825     | Ribosomal_L24/26_CS           | 0        | 0        | 1.726365584 |               |        | RPL26L1                        |
| 1032 | Domain | IPR021413    | Ribosomal_L1                  | 0        | 0        | 1.726365584 |               |        | RPL10A                         |
| 1033 | Domain | IPR015070    | EF_hand_DIBP                  | 0        | 0        | 1.726365584 |               |        | MYL12A                         |
| 1034 | Domain | 2.20.140.10  | -                             | 0        | 0        | 1.726365584 |               |        | PARP2                          |
| 1035 | Domain | PF08071      | RS4NT                         | 0        | 0        | 1.726365584 |               |        | RPS4X                          |
| 1036 | Domain | SM00773      | WGR                           | 0        | 0        | 1.726365584 |               |        | PARP2                          |
| 1037 | Domain | IPR004037    | Ribosomal_L7Ae_CS             | 0        | 0        | 1.726365584 |               |        | RPL7A                          |
| 1038 | Domain | IPR000876    | Ribosomal_S4e                 | 0        | 0        | 1.726365584 |               |        | RPS4X                          |
| 1039 | Domain | IPR033133    | PUM-HD                        | 0        | 0        | 1.726365584 |               |        | PUM3                           |
| 1040 | Domain | PF00327      | Ribosomal_L30                 | 0        | 0        | 1.726365584 |               |        | RPL7                           |
| 1041 | Domain | PF16121      | 4OS_S4_C                      | 0        | 0        | 1.726365584 |               |        | RPS4X                          |
| 1042 | Domain | IPR013845    | Ribosomal_S4e_central_region  | 0        | 0        | 1.726365584 |               |        | RPS4X                          |
| 1043 | Domain | IPR023674    | Ribosomal_L1-like             | 0        | 0        | 1.726365584 |               |        | RPL10A                         |
| 1044 | Domain | IPR018492    | Ribosomal_L7Ae/L8/Nhp2        | 0        | 0        | 1.726365584 |               |        | RPL7A                          |
| 1045 | Domain | PF05406      | WGR                           | 0        | 0        | 1.726365584 |               |        | PARP2                          |
| 1046 | Domain | IPR019926    | Ribosomal_L3_CS               | 0        | 0        | 1.726365584 |               |        | RPL3                           |
| 1047 | Domain | PS01082      | RIBOSOMAL_L7AE                | 0        | 0        | 1.726365584 |               |        | RPL7A                          |
| 1048 | Domain | PF16482      | Staufen_C                     | 0        | 0        | 1.726365584 |               |        | STAU2                          |
| 1049 | Domain | PF00828      | Ribosomal_L27A                | 0        | 0        | 1.726365584 |               |        | RPL27A                         |
| 1050 | Domain | IPR016095    | Ribosomal_L1_3-a/b-sand       | 0        | 0        | 1.726365584 |               |        | RPL10A                         |
| 1051 | Domain | PF00687      | Ribosomal_L1                  | 0        | 0        | 1.726365584 |               |        | RPL10A                         |
| 1052 | Domain | IPR032277    | 4OS_S4_C                      | 0        | 0        | 1.726365584 |               |        | RPS4X                          |
| 1053 | Domain | IPR020838    | DBINO                         | 0        | 0        | 1.726365584 |               |        | SMARCA5                        |
| 1054 | Domain | PS01108      | RIBOSOMAL_L24                 | 0        | 0        | 1.726365584 |               |        | RPL26L1                        |
| 1055 | Domain | PS00474      | RIBOSOMAL_L3                  | 0        | 0        | 1.726365584 |               |        | RPL3                           |
| 1056 | Domain | 3.30.190.20  | -                             | 0        | 0        | 1.726365584 |               |        | RPL10A                         |
| 1057 | Domain | IPR027141    | LSm4/Sm_D1/D3                 | 0        | 0        | 1.726365584 |               |        | SNRPD3                         |
| 1058 | Domain | PF00900      | Ribosomal_S4e                 | 0        | 0        | 1.726365584 |               |        | RPS4X                          |
| 1059 | Domain | PF12265      | CAF1C_H4-bd                   | 0        | 0        | 1.726365584 |               |        | GRWD1                          |
| 1060 | Domain | SM00276      | GLECT                         | 1.720081 | 0        | 0           | LGALS7        |        |                                |
| 1061 | Domain | PF00337      | Gal-bind_lectin               | 1.720081 | 0        | 0           | LGALS7        |        |                                |
| 1062 | Domain | IPR001079    | Galectin_CRD                  | 1.720081 | 0        | 0           | LGALS7        |        |                                |
| 1063 | Domain | PSS1304      | GALLECTIN                     | 1.720081 | 0        | 0           | LGALS7        |        |                                |
| 1064 | Domain | SM00908      | Gal-bind_lectin               | 1.720081 | 0        | 0           | LGALS7        |        |                                |
| 1065 | Domain | PF00249      | Myb_DNA-binding               | 0        | 0        | 1.689526203 |               |        | NCOR1,SMARCA5                  |
| 1066 | Domain | PS00194      | THIOREDOXIN_1                 | 0        | 0        | 1.674763    |               | TXN    |                                |
| 1067 | Domain | IPR014014    | RNA_helicase_DEAD_Q_motif     | 0        | 0        | 1.644103365 |               |        | DDX21,DDX24                    |
| 1068 | Domain | PSS1195      | QL_MOTIF                      | 0        | 0        | 1.644103365 |               |        | DDX21,DDX24                    |
| 1069 | Domain | PF05569      | ZZ                            | 1.641697 | 0        | 0           | SQSTM1        |        |                                |
| 1070 | Domain | PSS0135      | ZF_ZF_2                       | 1.641697 | 0        | 0           | SQSTM1        |        |                                |
| 1071 | Domain | PSS1357      | ZF_ZF_1                       | 1.641697 | 0        | 0           | SQSTM1        |        |                                |
| 1072 | Domain | IPR009000    | Transl_B-barrel               | 0        | 1.641686 | 0           |               | EEF1A2 |                                |
| 1073 | Domain | PSS0090      | MYB_LIKE                      | 0        | 0        | 1.622388144 |               |        |                                |
| 1074 | Domain | IPR004433    | Znf_ZZ                        | 1.618482 | 0        | 0           | SQSTM1        |        | NCOR1,SMARCA5                  |
| 1075 | Domain | SM00291      | Znf_ZZ                        | 1.618482 | 0        | 0           | SQSTM1        |        |                                |
| 1076 | Domain | 1.10.238.10  | -                             | 0        | 0        | 1.605788099 |               |        | MYL12A,MYL6,MYL6B,MYL9,S100A14 |
| 1077 | Domain | IPR041032    | Poly(ADP-ribose)pol_reg_dom   | 0        | 0        | 1.602782416 |               |        | PARP2                          |
| 1078 | Domain | IPR003690    | MTERF                         | 0        | 0        | 1.602782416 |               |        | MTERF1                         |
| 1079 | Domain | IPR000533    | Tropomyosin                   | 0        | 0        | 1.602782416 |               |        | TPM1                           |
| 1080 | Domain | PF00261      | Tropomyosin                   | 0        | 0        | 1.602782416 |               |        | TPM1                           |
| 1081 | Domain | PSS1060      | PARP_ALPHA_HD                 | 0        | 0        | 1.602782416 |               |        | PARP2                          |
| 1082 | Domain | 1.20.142.10  | -                             | 0        | 0        | 1.602782416 |               |        | PARP2                          |
| 1083 | Domain | PS00326      | TRIOPOMYOSIN                  | 0        | 0        | 1.602782416 |               |        | TPM1                           |
| 1084 | Domain | PF01479      | S4                            | 0        | 0        | 1.602782416 |               |        | RPS4X                          |
| 1085 | Domain | SM00025      | Pumilio                       | 0        | 0        | 1.602782416 |               |        | PUM3                           |
| 1086 | Domain | PSS0302      | PUM                           | 0        | 0        | 1.602782416 |               |        | PUM3                           |
| 1087 | Domain | IPR011313    | Pumilio_RNA-bd_rpt            | 0        | 0        | 1.602782416 |               |        | PUM3                           |
| 1088 | Domain | PF02536      | mTERF                         | 0        | 0        | 1.602782416 |               |        | MTERF1                         |
| 1089 | Domain | SM00733      | Mterf                         | 0        | 0        | 1.602782416 |               |        | MTERF1                         |
| 1090 | Domain | PF00085      | Thioredoxin                   | 0        | 1.582382 | 0           |               | TXN    |                                |
| 1091 | Domain | 1.20.20.70   | -                             | 0        | 0        | 1.541394878 |               |        | IMPDH1,IMPDH2                  |
| 1092 | Domain | PF00098      | JF_CCHC                       | 1.536571 | 0        | 0           | RBBP6         |        |                                |
| 1093 | Domain | SM00363      | S4                            | 0        | 0        | 1.507226564 |               |        | RPS4X                          |
| 1094 | Domain | SM00572      | DDZ                           | 0        | 0        | 1.507226564 |               |        | IEF3                           |
| 1095 | Domain | IPR005861    | DDZ_dom                       | 0        | 0        | 1.507226564 |               |        | IEF3                           |
| 1096 | Domain | PSS0889      | S4                            | 0        | 0        | 1.507226564 |               |        | RPS4X                          |
| 1097 | Domain | PF07528      | DDZ                           | 0        | 0        | 1.507226564 |               |        | IEF3                           |
| 1098 | Domain | PSS1703      | DDZ                           | 0        | 0        | 1.507226564 |               |        | IEF3                           |
| 1099 | Domain | SM00540      | LEM                           | 0        | 0        | 1.507226564 |               |        | EMO                            |
| 1100 | Domain | IPR013785    | AdoLase_TIM                   | 0        | 0        | 1.504028796 |               |        | IMPDH1,IMPDH2                  |
| 1101 | Domain | IPR013320    | ConA-like_dom                 | 1.498809 | 0        | 0           | HNRNPJ,LGALS7 |        |                                |
| 1102 | Domain | PF00013      | KH_1                          | 0        | 0        | 1.495173    |               |        | HNRNPK                         |
| 1103 | Domain | 4.10.60.10   | -                             | 1.484122 | 0        | 0           | RBBP6         |        |                                |
| 1104 | Domain | 3.30.1370.10 | -                             | 0        | 0        | 1.484005    |               |        | HNRNPK                         |
| 1105 | Domain | SM00322      | KH                            | 0        | 0        | 1.473243    |               |        | HNRNPK                         |
| 1106 | Domain | IPR004087    | KH_dom                        | 0        | 0        | 1.473243    |               |        | HNRNPK                         |
| 1107 | Domain | IPR013766    | Thioredoxin_domain            | 0        | 0        | 1.462693    |               |        | TXN                            |
| 1108 | Domain | IPR011992    | EF-hand_dom_pair              | 0        | 0        | 1.45306242  |               |        | MYL12A,MYL6,MYL6B,MYL9,S100A14 |
| 1109 | Domain | PSS0084      | KH_TYFE_1                     | 0        | 0        | 1.4524      |               |        | HNRNPK                         |
|      |        |              |                               |          |          |             |               |        |                                |



|             |           |                                                                                    |          |             |    |                                          |                |                                                         |                                                         |
|-------------|-----------|------------------------------------------------------------------------------------|----------|-------------|----|------------------------------------------|----------------|---------------------------------------------------------|---------------------------------------------------------|
| 1443 PubMed | 2459332   | Ablation of the oncogenic transcription factor ERG by deubiquitinase               | 3.53163  | 3.89577     | 10 | HNRNP11,HNRNP11                          | EF1A2,SFQ      | DOI:10.1093/nrn/nrn113                                  | DOI:10.1093/nrn/nrn113                                  |
| 1450 PubMed | 14559993  | Regulation of alternative splicing by SrpB and its interacting protein             | 3.491138 | 1.850411    | 10 | HNRNP11,HNRNP11                          | HNRNP11,SFQ    | CIDBP,CIDBP,CHD1A,CHD1A,HNRNP11,HNRNP11,HNRNP11,HNRNP11 | CIDBP,CIDBP,CHD1A,CHD1A,HNRNP11,HNRNP11,HNRNP11,HNRNP11 |
| 1451 PubMed | 2000949   | Human IGIS1 conjugation targets both IFN-induced and constitutive                  | 4.320554 | 3.001076    | 10 | HNRNP11,XRCC5,XRCC6                      | EF1A2,HNRNP11  |                                                         |                                                         |
| 1452 PubMed | 12268729  | Proteomic identification of common Sfp ubiquitin ligase FBXO6-interacting proteins | 5.095548 | 1.823618    | 10 | DXH15,HNRNP11,HNRNP11,HNRNP11,XF11,RP1A1 | HNRNP11,RP56   |                                                         |                                                         |
| 1453 PubMed | 23402219  | Quantitative study of the interaction of PRC4, involved in the EGF-                | 4.074345 | 2.183170    | 10 | HNRNP11,XRCC5,XRCC6                      | EF1A2,XF11     |                                                         |                                                         |
| 1454 PubMed | 23602568  | The protein interaction landscape of the human CMGC kinase group                   | 4.836021 | 1.723035    | 10 | BROX1,DXH15,HNRNP11,NOP2,R2B86           | EF1A2,RP15     |                                                         |                                                         |
| 1455 PubMed | 15303970  | Characterization of Staufen 1 ribonucleoprotein complexes.                         | 1.938841 | 4.573821    | 10 | HNRNP11                                  | HNRNP11,RP56   |                                                         |                                                         |
| 1456 PubMed | 26381412  | ATAC (Telomeric Accessibility Group D Complement) Promotes Ras                     | 1.889912 | 4.473585    | 10 | HNRNP11                                  | RP51A,RP51B    |                                                         |                                                         |
| 1457 PubMed | 125900206 | A direct protein-protein interaction for investigating intracellular               | 5.007714 | 1.321704    | 10 | BROX1,DXH15,RP1A1,RP135,SOSTM1,XRCC6     | EF1A2,NAP11    |                                                         |                                                         |
| 1458 PubMed | 15782174  | Identifying and quantifying in vivo methylation sites by heavy methyl              | 1.850141 | 4.124844    | 10 | HNRNP11                                  | HNRNP11,SFQ    |                                                         |                                                         |
| 1459 PubMed | 12226669  | Comprehensive proteomic analysis of the human spliceosome.                         | 4.751561 | 1.479099    | 10 | HNRNP11,HNRNP11,HNRNP11                  | HNRNP11        |                                                         |                                                         |
| 1460 PubMed | 17275712  | Voltage-gated ion channel Kv4.3 is associated with Rap guanine nucle               | 4.14518  | 2.088311    | 10 | XRCC5,XRCC6                              | NAP11          |                                                         |                                                         |
| 1461 PubMed | 11404347  | Complete map of the human ribosomal protein genes: assignment                      | 4.14518  | 2.088311    | 10 | RP136                                    | RP136          |                                                         |                                                         |
| 1462 PubMed | 12418040  | Perturbation of the mutated EGF receptor identifies vulnerabilities                | 3.651563 | 2.552325    | 10 | HNRNP11,HNRNP11,SOSTM1                   | EF1A2,SFQ      |                                                         |                                                         |
| 1463 PubMed | 25817432  | Cmr1/WDR76 defines a nuclear genomic stress body linking genome                    | 4.023256 | 2.021084    | 10 | XRCC5,XRCC6                              | RP51B          |                                                         |                                                         |
| 1464 PubMed | 25852190  | Iterative analysis of kinase networks in TRAIL-induced apoptosis                   | 5.992663 | 0           | 10 | HNRNP11,HNRNP11,SOSTM1,XRCC5,XRCC6       |                |                                                         |                                                         |
| 1465 PubMed | 10606405  | Regulation-mediated DNA damage by camptothecin induces pro-apo                     | 5.095511 | 0           | 10 | RP1A1,XRCC5                              |                |                                                         |                                                         |
| 1466 PubMed | 20711212  | Regulation of DNA-dependent protein kinase by protein kinase C2.1                  | 5.909511 | 0           | 10 | XRCC5,XRCC6                              |                |                                                         |                                                         |
| 1467 PubMed | 20378560  | Mutations in the ribosomal protein genes in Japanese patients with                 | 0        | 5.873365    | 10 |                                          | RP51B,RP524    |                                                         |                                                         |
| 1468 PubMed | 20378560  | Mutations in the ribosomal protein genes in Japanese patients with                 | 0        | 5.873365    | 10 |                                          | RP51B,RP524    |                                                         |                                                         |
| 1469 PubMed | 21423176  | Analysis of the myosin II-responsive focal adhesion protein reveal                 | 0        | 5.804999    | 10 | HNRNP11,RP131,RP51B,RP519                |                |                                                         |                                                         |
| 1470 PubMed | 12144100  | Protein array based interaction analysis of amyloid- $\beta$ indicates an          | 0        | 5.694910    | 10 | RP131,RP136,RP51B,RP519                  |                |                                                         |                                                         |
| 1471 PubMed | 23265833  | Dynamic protein-protein interaction wiring of the human spliceosome                | 5.693631 | 0           | 10 | DXH15,HNRNP11,HNRNP11,HNRNP11            |                |                                                         |                                                         |
| 1472 PubMed | 26360636  | Investigation of the HIV-1 matrix interaction during virus replication             | 5.687785 | 0           | 10 | XRCC5,XRCC6                              |                |                                                         |                                                         |
| 1473 PubMed | 17182002  | HDIC9, a novel human type C DnaJ/HSP40 member interacts with an                    | 5.687785 | 0           | 10 | DNAJ9,HSP40                              |                |                                                         |                                                         |
| 1474 PubMed | 25855564  | PHR1 promotes genome integrity by modulating non-homologous re                     | 5.687785 | 0           | 10 | XRCC5,XRCC6                              |                |                                                         |                                                         |
| 1475 PubMed | 17389560  | Dynamic binding of Ku80, Ku70 and NERD to the I- $\kappa$ B promoter in v          | 5.687785 | 0           | 10 | XRCC5,XRCC6                              |                |                                                         |                                                         |
| 1476 PubMed | 15592455  | Immunofluorescent profiling of tyrosine phosphorylation in cancer                  | 3.306588 | 2.324872    | 10 | HNRNP11,HNRNP11,SOSTM1                   | EF1A2,RP131    |                                                         |                                                         |
| 1477 PubMed | 15561718  | Systematic identification and analysis of mammalian small ubiquitin                | 10       | 5.588254979 | 10 | DOX2A,HNRNP11,XRCC5                      |                |                                                         |                                                         |
| 1478 PubMed | 16791210  | Dynamic proteomics in individual human cells uncovers widespread                   | 3.67788  | 1.850629    | 10 | NOP2,RP123A                              | RP136          |                                                         |                                                         |
| 1479 PubMed | 23211978  | A bead based approach for large-scale identification of in vitro kin               | 2.584645 | 2.941612    | 10 | BANF1,DOX2A                              | RP51B,SFQ      |                                                         |                                                         |
| 1480 PubMed | 21172662  | The ACF1 complex is required for DNA double-strand break repair                    | 5.151186 | 0           | 10 | XRCC5,XRCC6                              |                |                                                         |                                                         |
| 1481 PubMed | 25281560  | Protein biotinylation and affinity purification are complementary i                | 10       | 5.505948412 | 10 | BROX1,DNAJ9,XF11,NOP2,SOSTM1,XRCC6       |                |                                                         |                                                         |
| 1482 PubMed | 26561776  | Reversible oxidation of phosphatase and tensin homologue (PTEN) al                 | 0        | 5.443125    | 10 |                                          | RP131,RP56,TXN |                                                         |                                                         |
| 1483 PubMed | 15164287  | FTT1 is an antiviral protein that recognizes 5'-triphosphate RNA.                  | 1.569107 | 3.828259    | 10 | HNRNP11                                  | RP131,TXN      |                                                         |                                                         |
| 1484 PubMed | 20496165  | Comprehensive screen of genetic variation in DNA repair pathway g                  | 5.368259 | 0           | 10 | RP1A1,XRCC5,XRCC6                        |                |                                                         |                                                         |
| 1485 PubMed | 20496165  | Comprehensive screen of genetic variation in DNA repair pathway g                  | 5.368259 | 0           | 10 | RP1A1,XRCC5,XRCC6                        |                |                                                         |                                                         |



































































































































|       |        |             |                                                                        |   |   |             |          |
|-------|--------|-------------|------------------------------------------------------------------------|---|---|-------------|----------|
| 11019 | PubMed | 17320162    | Physical and functional association of a trimethyl H3K4 demethylase    | 0 | 0 | 2.148677834 | HIST3H3  |
| 11020 | PubMed | 20506485.gr | RNA-mediated gene silencing of FUT1 and FUT2 influences expres         | 0 | 0 | 2.148677834 | NCL      |
| 11021 | PubMed | 17138574    | Primary hyperparathyroidism-what the nephrologist should know-         | 0 | 0 | 2.148677834 | CCDC73   |
| 11022 | PubMed | 25787750    | A Hsuar polyaccharide reduced metastasis of human hepatocellula        | 0 | 0 | 2.148677834 | HNRNP0   |
| 11023 | PubMed | 22127260    | Barrier-to-Autointegration Factor influences specific histone modifi   | 0 | 0 | 2.148677834 | BANF1    |
| 11024 | PubMed | 23060763    | Exploiting the repertoire of CK2 inhibitors to target DYRK and PIM ki  | 0 | 0 | 2.148677834 | CSNK2A1  |
| 11025 | PubMed | 17488107.gr | The prolyl isomerase Pin1 affects Che-1 stability in response to app   | 0 | 0 | 2.148677834 | AATF     |
| 11026 | PubMed | 23612983    | Protein kinase CK2 regulates the dimerization of histone deacetylase   | 0 | 0 | 2.148677834 | CSNK2A1  |
| 11027 | PubMed | 19506078    | Arachidonic acid stimulates cell adhesion through a novel p38 MAPK     | 0 | 0 | 2.148677834 | HSPB1    |
| 11028 | PubMed | 12644465    | Structural requirements for assembly of the CSL:intracellular Notch1   | 0 | 0 | 2.148677834 | RBP1     |
| 11029 | PubMed | 15972823.gr | Characterization of the G alpha(s) regulator cysteine string protein.  | 0 | 0 | 2.148677834 | HSPAB    |
| 11030 | PubMed | 18276832    | Interleukin-1 receptor-associated kinase (IRAK)-1-mediated NF-kapp     | 0 | 0 | 2.148677834 | HIST3H3  |
| 11031 | PubMed | 21412170    | Cyclotrin, annexin A1, and mitogen-activated protein kinase 53 are     | 0 | 0 | 2.148677834 | ANXA1    |
| 11032 | PubMed | 25536365    | Annexin-A1 regulates microRNA-26b and microRNA-562 to directly         | 0 | 0 | 2.148677834 | ANXA1    |
| 11033 | PubMed | 15225637    | Phosphorylation of the regulatory beta-subunit of protein kinase CK    | 0 | 0 | 2.148677834 | CSNK2A1  |
| 11034 | PubMed | 21859890    | Competitive regulation of nucleolin expression by HuR and miR-494.     | 0 | 0 | 2.148677834 | NCL      |
| 11035 | PubMed | 15671022    | Heat shock protein 70 inhibits alpha-synuclein fibril formation via p  | 0 | 0 | 2.148677834 | HSPALIA  |
| 11036 | PubMed | 22767590.gr | Protein kinase casein kinase 2-mediated upregulation of N-cadherin     | 0 | 0 | 2.148677834 | CSNK2A1  |
| 11037 | PubMed | 14985373    | Genetic testing in familial isolated hyperparathyroidism: unexpected   | 0 | 0 | 2.148677834 | CCDC73   |
| 11038 | PubMed | 26369530    | Cysteine-rich secretory protein 3 plays a role in prostate cancer cell | 0 | 0 | 2.148677834 | ANXA1    |
| 11039 | PubMed | 16224547    | The N-terminal domain of the human cF2beta subunit and the CK2         | 0 | 0 | 2.148677834 | CSNK2A1  |
| 11040 | PubMed | 92902929    | Assignment of the human gene for KIB2/NBP-1k to chromosome 9p1         | 0 | 0 | 2.148677834 | RBP1     |
| 11041 | PubMed | 12466959.gr | Prohibitin co-localizes with Rb in the nucleus and recruits N-CoR and  | 0 | 0 | 2.148677834 | NCOR1    |
| 11042 | PubMed | 23079206    | Diagnostic utility of von Hippel-Lindau gene product, maspin, IMP3,    | 0 | 0 | 2.148677834 | IGF2BP3  |
| 11043 | PubMed | 17828388    | Upregulation of peroxisome proliferator-activated receptor gamma       | 0 | 0 | 2.148677834 | PPARG    |
| 11044 | PubMed | 17932043    | Truncation of annexin A1 is a regulatory lever for linking epidermal   | 0 | 0 | 2.148677834 | ANXA1    |
| 11045 | PubMed | 2117608     | Phosphate groups as substrate determinants for casein kinase I acti    | 0 | 0 | 2.148677834 | CSNK2A1  |
| 11046 | PubMed | 17434929.gr | The CB1-independent Notch1 signal pathway activates human c-myc        | 0 | 0 | 2.148677834 | RBP1     |
| 11047 | PubMed | 9632798     | Functional conservation of the transportin nuclear import pathway i    | 0 | 0 | 2.148677834 | HNRNP0   |
| 11048 | PubMed | 17576382.gr | Photodynamic therapy resistant human colon carcinoma HT29 cells        | 0 | 0 | 2.148677834 | HSPB1    |
| 11049 | PubMed | 23272037    | Oxanthone regulates CTRF expression in C6-36 cells with the ir         | 0 | 0 | 2.148677834 | HSPALIA  |
| 11050 | PubMed | 16489457.gr | Coupling caspase cleavage and ubiquitin-proteasome-dependent deg       | 0 | 0 | 2.148677834 | SSRP1    |
| 11051 | PubMed | 22700724.gr | DC-SIGN, C1q, and gC1qR form a trimolecular receptor complex on t      | 0 | 0 | 2.148677834 | C1QB     |
| 11052 | PubMed | 25402957    | Epstein-Barr virus latent membrane protein 2A suppresses the expres    | 0 | 0 | 2.148677834 | YBK1     |
| 11053 | PubMed | 17462627    | Distinct functional domains in nesprin-1alpha and nesprin-2beta bin    | 0 | 0 | 2.148677834 | TM4D     |
| 11054 | PubMed | 19855935    | The p53-p21[Cip1/WAF1] pathway is necessary for cellular senescen      | 0 | 0 | 2.148677834 | CSNK2A1  |
| 11055 | PubMed | 19033382    | Nucleoside mobilization of nucleostemin stabilizes MDM2 and p53        | 0 | 0 | 2.148677834 | GNL3     |
| 11056 | PubMed | 22891325.gr | Nuclear factor-kappaB binding motifs specify Toll-like receptor-induc  | 0 | 0 | 2.148677834 | NCOR1    |
| 11057 | PubMed | 21613208    | Insulin growth factor-2 binding protein 3 (IGFBP3) is a glioblastoma   | 0 | 0 | 2.148677834 | IGF2BP3  |
| 11058 | PubMed | 19312556    | A novel small-subunit proteasome assembly intermediate that conta      | 0 | 0 | 2.148677834 | 19312556 |
| 11059 | PubMed | 25231991    | The cytokine IL-6 reactivates breast stromal fibroblasts through tran  | 0 | 0 | 2.148677834 | HNRNP0   |
| 11060 | PubMed | 15358769    | Hsp90 chaperones wild-type p53 tumor suppressor protein.               | 0 | 0 | 2.148677834 | CSNK2A1  |
| 11061 | PubMed | 23271055.gr | Imbalance of Hsp70 family variants fosters tau accumulation.           | 0 | 0 | 2.148677834 | HSPALIA  |
| 11062 | PubMed | 19956274.gr | Natural product derivative Bui-4-fluorobenzoylthiuride inhibits turn   | 0 | 0 | 2.148677834 | TUBB1    |
| 11063 | PubMed | 7664639     | Mechanisms of platelet activation by a stimulatory antibody cross-li   | 0 | 0 | 2.148677834 | CSNK2A1  |
| 11064 | PubMed | 11973333    | Combinatorial interactions of p53, activating protein-2, and YB-1 wit  | 0 | 0 | 2.148677834 | YBK1     |
| 11065 | PubMed | 22049078.gr | Nucleolin protein interacts with microprocessor complex to affect bi   | 0 | 0 | 2.148677834 | NCL      |
| 11066 | PubMed | 25715862    | Modulation of deregulated autophagy-mediated autophagy by a pht        | 0 | 0 | 2.148677834 | CSNK2A1  |
| 11067 | PubMed | 23428870    | Lipid-induced repression of the glucocorticoid receptor gene is me     | 0 | 0 | 2.148677834 | NCOR1    |
| 11068 | PubMed | 24399445    | Drebrin E depletion in human intestinal epithelial cells mimics Rabb1  | 0 | 0 | 2.148677834 | DBN1     |
| 11069 | PubMed | 22960332    | Genetic association and gene-gene interaction of HAS2, HABP1 and i     | 0 | 0 | 2.148677834 | C1QB     |
| 11070 | PubMed | 7789991     | Chromosomal localization of mitochondrial transcription factor A (TF   | 0 | 0 | 2.148677834 | SSBP1    |
| 11071 | PubMed | 24507332    | The assembly and intermolecular properties of the Rb1-Tom20-p34        | 0 | 0 | 2.148677834 | HSPB1    |
| 11072 | PubMed | 12572891    | Protein kinase CK2 regulates CACCB phosphatase activity.               | 0 | 0 | 2.148677834 | CSNK2A1  |
| 11073 | PubMed | 18852283.gr | Stabilized beta-catenin functions through TCF/LEF proteins and the p   | 0 | 0 | 2.148677834 | RBP1     |
| 11074 | PubMed | 11756447.gr | Urokinase-dependent human vascular smooth muscle cell adhesion i       | 0 | 0 | 2.148677834 | CSNK2A1  |
| 11075 | PubMed | 23587423    | A small molecule inhibitor of fungal histone acetyltransferase Rtt10   | 0 | 0 | 2.148677834 | HIST1H4A |
| 11076 | PubMed | 22194066    | Phosphorylation of the transcription factor YY1 by C/EBPalpha preven   | 0 | 0 | 2.148677834 | CSNK2A1  |
| 11077 | PubMed | 23460923.gr | PRAME is a golgi-targeted protein that associates with the Elongin B   | 0 | 0 | 2.148677834 | HIST3H3  |
| 11078 | PubMed | 21281639    | Arachidonic acid stimulates formation of a novel complex containin     | 0 | 0 | 2.148677834 | NCL      |
| 11079 | PubMed | 22406139    | HUHP uses distinct CENP-A surfaces to recognize and to stabilize CE    | 0 | 0 | 2.148677834 | HIST1H4A |
| 11080 | PubMed | 20084477.gr | Heteromeric complexes of heat shock protein 70 (HSP70) family me       | 0 | 0 | 2.148677834 | HSPAB    |
| 11081 | PubMed | 24113061    | Molecularly defined synthetase catalyzes biotinylation of heat shock p | 0 | 0 | 2.148677834 | HSPALIA  |
| 11082 | PubMed | 19147558    | Tenascin-C is a novel RBP-kappa-induced target gene for Notch signa    | 0 | 0 | 2.148677834 | RBP1     |
| 11083 | PubMed | 15526283    | Differentiation of human colon adenocarcinoma cells alters the expr    | 0 | 0 | 2.148677834 | ANXA1    |
| 11084 | PubMed | 21257709.gr | Oncogenic synergism between ErbB1, nucleolin, and mutant Ras.          | 0 | 0 | 2.148677834 | NCL      |
| 11085 | PubMed | 16354684.gr | PTF1 is an organ-specific Notch-independent basic helix-loop-he        | 0 | 0 | 2.148677834 | RBP1     |
| 11086 | PubMed | 11784858    | Hsp27 as a negative regulator of cytochrome C release.                 | 0 | 0 | 2.148677834 | HSPB1    |
| 11087 | PubMed | 23071649    | The role of chaperone-mediated autophagy in huntingtin degradatio      | 0 | 0 | 2.148677834 | HSPAB    |
| 11088 | PubMed | 22449972    | Crystal structures of the Tudor domains of human PZF2 reveal nov       | 0 | 0 | 2.148677834 | HIST1H4A |
| 11089 | PubMed | 10421373    | The chromatin-specific transcription elongation factor FACT compri     | 0 | 0 | 2.148677834 | SSBP1    |
| 11090 | PubMed | 23267549    | CK2 phosphorylation of human Sec53 regulates its interaction with      | 0 | 0 | 2.148677834 | CSNK2A1  |
| 11091 | PubMed | 21103899.gr | Role of low native state kinetic stability and interaction of partiall | 0 | 0 | 2.148677834 | HSPAB    |
| 11092 | PubMed | 22349439    | A molecular mechanism underlying ovarian dysfunction of polycystic     | 0 | 0 | 2.148677834 | NCOR1    |
| 11093 | PubMed | 17661346    | The Role of heat shock protein 27 in extravascular trophoblast differ  | 0 | 0 | 2.148677834 | HSPB1    |
| 11094 | PubMed | 23165237    | Oncogenic microRNA-155 down-regulates tumor suppressor CCND3           | 0 | 0 | 2.148677834 | CCDC73   |
| 11095 | PubMed | 19648825    | Nuclear Y-box binding protein-1, a predictive marker of prognosis, is  | 0 | 0 | 2.148677834 | YBK1     |
| 11096 | PubMed | 26381409    | The RNA binding complexes NF45-NF90 and NF45-NF110 associat            | 0 | 0 | 2.148677834 | ILF3     |
| 11097 | PubMed | 16428295.gr | PoP38 associates with proteins constituting the mitochondrial DNA      | 0 | 0 | 2.148677834 | SSBP1    |
| 11098 | PubMed | 19520849    | Role of pULN in methylation of 5m proteins by PRMT5.                   | 0 | 0 | 2.148677834 | SNRPD3   |
| 11099 | PubMed | 21817107    | MicroRNA-21 regulates vascular smooth muscle cell function via tar     | 0 | 0 | 2.148677834 | TFR1     |
| 11100 | PubMed | 18650551.gr | AUF1 and HuR proteins stabilize interleukin-8 mRNA in human saliv      | 0 | 0 | 2.148677834 | HNRNP0   |
| 11101 | PubMed | 25544755    | MicroRNA-130a associates with ribosomal protein L11 to suppress c      | 0 | 0 | 2.148677834 | RPL11    |
| 11102 | PubMed | 20061392.gr | Regulation of vascular endothelial growth factor-induced endotheli     | 0 | 0 | 2.148677834 | ANXA1    |
| 11103 | PubMed | 21423216    | YB-1 evokes susceptibility to cancer through cytoskeleton failure, mit | 0 | 0 | 2.148677834 | YBK1     |
| 11104 | PubMed | 23420842.gr | Casein kinase 2 phosphorylation of protein kinase C and casein kinas   | 0 | 0 | 2.148677834 | CSNK2A2  |
| 11105 | PubMed | 17242367.gr | Mx2-interacting nuclear target protein (Mint) deficiency reveals ne    | 0 | 0 | 2.148677834 | RBP1     |
| 11106 | PubMed | 2513494     | Fine-tuning of Smad protein function by poly(ADP-ribose) polymeras     | 0 | 0 | 2.148677834 | PARP2    |
| 11107 | PubMed | 23478443.gr | Splicing-factor oncoprotein SRP1 stabilizes p53 via RPL5 and induce    | 0 | 0 | 2.148677834 | RPL5     |
| 11108 | PubMed | 14612427.gr | Ribosomal protein L11 negatively regulates oncoprotein MDM2 and        | 0 | 0 | 2.148677834 | RPL11    |
| 11109 | PubMed | 14715706.gr | Interaction between 3' untranslated region of calcitonin receptor me   | 0 | 0 | 2.148677834 | HNRNP0   |
| 11110 | PubMed | 22077956.gr | Radioresistance of human glioma spheroids and expression of HSP70      | 0 | 0 | 2.148677834 | HSPALIA  |
| 11111 | PubMed | 21132403    | Quantitative proteomic analysis identifying three annexins as lymph    | 0 | 0 | 2.148677834 | ANXA1    |
| 11112 | PubMed | 20368620.gr | Tropomodulin isoforms regulate thin filament pointed-end capping i     | 0 | 0 | 2.148677834 | TMOD3    |
| 11113 | PubMed | 22158085.gr | Identification and validation of novel serum markers for early diagn   | 0 | 0 | 2.148677834 | TMOD3    |
| 11114 | PubMed | 19506078.gr | Arachidonic acid stimulates cell adhesion through a novel p38 MAPK     | 0 | 0 | 2.148677834 | HSPB1    |
| 11115 | PubMed | 21966413.gr | No interaction of barrier-to-autointegration factor (BAF) with HIV-1   | 0 | 0 | 2.148677834 | BANF1    |
| 11116 | PubMed | 23470599    | The Ring-H2 finger motif of CKBIP1/SAG is necessary for interaction    | 0 | 0 | 2.148677834 | CSNK2A1  |
| 11117 | PubMed | 17079617    | Kat5-3 represses transcription via chromatin binding, interaction      | 0 | 0 | 2.148677834 | NCOR1    |
| 11118 | PubMed | 19487031.gr | Cell- and stage-specific chromatin structure across the Complement     | 0 | 0 | 2.148677834 | RBP1     |
| 11119 | PubMed | 22302987    | Presenilin-2 regulates the degradation of RBP-1k protein through p3    | 0 | 0 | 2.148677834 | RBP1     |
| 11120 | PubMed | 9512561     | Interaction between the N-terminus of human topoisomerase I and        | 0 | 0 | 2.148677834 | HSPB1    |
| 11121 | PubMed | 18472181    | HSP27 regulates cell adhesion and invasion via modulation of focal     | 0 | 0 | 2.148677834 | RPL30    |
| 11122 | PubMed | 16908546.gr | Medulloblastoma outcome is adversely associated with overexpressi      | 0 | 0 | 2.148677834 | NCL      |
| 11123 | PubMed | 15620353    | Histone demethylation mediated by the nuclear amine oxidase hom        | 0 | 0 | 2.148677834 | HIST3H3  |
| 11124 | PubMed | 22302987.gr | Presenilin-2 regulates the degradation of RBP-1k protein through p3    | 0 | 0 | 2.148677834 | RBP1     |
| 11125 | PubMed | 9531570     | Reduced retinoic acid-sensitivities of nuclear receptor corepressor bl | 0 | 0 | 2.148677834 | NCOR1    |
| 11126 | PubMed | 17000763    | Nucleostemin delays cellular senescence and negatively regulates TR    | 0 | 0 | 2.148677834 | GNL3     |
| 11127 | PubMed | 17670747.gr | The protein kinase CK2 phosphorylates SNAP190 to negatively regul      | 0 | 0 | 2.148677834 | CSNK2A1  |
| 11128 | PubMed | 21103899    | Role of low native state kinetic stability and interaction of partiall | 0 | 0 | 2.148677834 | HSPAB    |
| 11129 | PubMed | 18832723.gr | Sumoylation of peroxisome proliferator-activated receptor gamma        | 0 | 0 | 2.148677834 | NCOR1    |
| 11130 | PubMed | 22423556    | BRCA1/p220 loss triggers BRCA1-RIS overexpression via mRNA stab        | 0 | 0 | 2.148677834 | HNRNP0   |
| 11131 | PubMed | 10364231    | PARP-2, a novel mammalian DNA damage-dependent poly(ADP-ribe           | 0 | 0 | 2.148677834 | PARP2    |
| 11132 | PubMed | 16803902.gr | Regulation of the MDM2-p53 pathway by ribosomal protein L11 inv        | 0 | 0 | 2.148677834 | RPL11    |
| 11133 | PubMed | 15314173.gr | Ribosomal protein L23 activates p53 by inhibiting MDM2 function in     | 0 | 0 | 2.148677834 | RPL23    |
| 11134 | PubMed | 23063713.gr | Tandem PHD fingers of MORF/MOZ acetyltransferases display select       | 0 | 0 | 2.148677834 | HIST3H3  |
| 11135 | PubMed | 23620951.gr | PRK1-phosphorylated mitofusin 2 is a Parkin receptor for culling da    | 0 | 0 | 2.148677834 | MFN2     |
| 11136 | PubMed | 20382408    | SLDOP, von Hippel-Lindau gene product, and IMP3 serve as a useful i    | 0 | 0 | 2.148677834 | IGF2BP3  |
| 11137 | PubMed | 8065311     | U20, a novel small nuclear RNA, is encoded in an intron of the nuc     | 0 | 0 | 2.148677834 | NCL      |
| 11138 | PubMed | 19014922.gr | Altered expression of HSPAB, HSPAB and PARK7 in spinocerebellar        | 0 | 0 | 2.148677834 | HSPAB    |
| 11139 | PubMed | 24894670    | Association of ABCB1, A1, and A11 with multidrug resistance            | 0 | 0 | 2.148677834 | TUBB1    |
| 11140 | PubMed | 18649648.gr | Short-chain fatty acids induce gamma-globin gene expression by dis     | 0 | 0 | 2.148677834 | NCOR1    |
| 11141 | PubMed | 8049265     | Presence of role of the SSRNA-L5 protein complex (SSRNLP) in the t     | 0 | 0 | 2.148677834 | RPL5     |
| 11142 | PubMed | 8856662     | Functionally distinct isoforms of dynactin are expressed in human ne   | 0 | 0 | 2.148677834 | TUBAAA   |
| 11143 | PubMed | 24002588    | CEBPA-MYH11/RUNX1 together with a complement of hematopoietic          | 0 | 0 | 2.148677834 | MYH11    |
| 11144 | PubMed | 18794547.gr | Occurrence of autoantibodies to annexin I, 14-3-3 theta and LAMR1      | 0 | 0 | 2.148677834 | ANXA1    |
| 11145 | PubMed | 18208561    | Spliceosomal protein E regulates neoplastic cell growth by modulati    | 0 | 0 | 2.148677834 | SNRPE    |
| 11146 | PubMed | 25605055    | Inhibition of basic site cleavage in bubble DNA by multifunctional p   | 0 | 0 | 2.148677834 | YBK1     |
| 11147 | PubMed | 18852122.gr | Structural basis for nuclear receptor corepressor recruitment by anti  | 0 | 0 | 2.148677834 | NCOR1    |
| 11148 | PubMed | 21587599.gr | Frequent germline mutations of the MEN1, CASR, and HNF1B/CDCK          | 0 | 0 | 2.148677834 | CCDC73   |
| 11149 | PubMed | 24280570    | ETHA, HSP27 and D1-5 molecular markers as prognostic factors in pa     | 0 | 0 | 2.148677834 | HSPALIA  |
| 11150 | PubMed | 23212905.gr | Toll-like receptor agonists and fibrillar range hyperthermia synergiz  | 0 | 0 | 2.148677834 | MFN2     |
| 11151 | PubMed | 15961417.gr | Mitofusins 1/2 and ERAlpha expression are increased in human ske       | 0 | 0 | 2.148677834 | SMARCA5  |
| 11152 | PubMed | 21738833.gr | Binding kinetics of human SWI chromatin-remodelers to DNA repair       | 0 | 0 | 2.148677834 | NCL      |
| 11153 | PubMed | 22433873.gr | Occurrence of nucleolin and ribosomal protein L26 (RPL26) in trans     | 0 | 0 | 2.148677834 | HSPALIA  |
| 11154 | PubMed | 12093808    | Nucleotide binding states of                                           |   |   |             |          |







[illegible]





















|       |             |                 |                          |          |          |        |                                                             |                                           |  |
|-------|-------------|-----------------|--------------------------|----------|----------|--------|-------------------------------------------------------------|-------------------------------------------|--|
| 13194 | Interaction | int:RPL22       | RPL22 interactions       | 5.794254 | 10       | 10     | DHX15,HNRNPM,HNRNPJ,RPL23A,RPL35                            | RPL31,RPL36,RPS18,RPS19,RPS24,RPS56       |  |
| 13195 | Interaction | int:NFKF        | NFKF interactions        | 5.779214 | 10       | 10     | BMS1,BRIL,DHX2,NOP2,RBBP6                                   | RPL31,RPS24,RPS56,RPS15,WDR12             |  |
| 13196 | Interaction | int:RPL12       | RPL12 interactions       | 5.764287 | 10       | 10     | DHX15,HNRNPM,HNRNPJ,RPL23A,RPL35                            | EEF1A2,NAP1L1,RPL31,RPL36,RPS18,RPS19,RP  |  |
| 13197 | Interaction | int:PRKN        | PRKN interactions        | 5.763855 | 10       | 10     | HNRNPH1,HNRNPM,HNRNPJ,HSPA1L,HGAL1,RPL23A,SOSTM             | EEF1A2,HNRNPM,NAP1L1,RPL31,RPS18,RPS24,R  |  |
| 13198 | Interaction | int:RPS23       | RPS23 interactions       | 5.74946  | 10       | 10     | HNRNPM,HNRNPJ,KIF11,RPL23A,RPL35                            | RPL31,RPL36,RPS18,RPS19,RPS24,RPS56       |  |
| 13199 | Interaction | int:RPS8        | RPS8 interactions        | 5.73913  | 10       | 10     | HNRNPM,HNRNPJ,NOP2,RPA1,RPL23A,RPL35                        | PURA,RPL31,RPL36,RPS18,RPS19,RPS24,RPS56  |  |
| 13200 | Interaction | int:VCAM1       | VCAM1 interactions       | 5.636851 | 10       | 10     | DHX15,HNRNPH1,HNRNPM,HNRNPJ,RPL35,XRCC5,XRCC6               | HNRNPM,RPL36,RPS18,RPS19,RPS24,RPS56,SFQ  |  |
| 13201 | Interaction | int:RPS25       | RPS25 interactions       | 5.634578 | 10       | 10     | CDX15,HNRNPM,HNRNPJ,RPL23A,RPL35                            | RPL31,RPL36,RPS18,RPS19,RPS24,RPS56       |  |
| 13202 | Interaction | int:RPL7A       | RPL7A interactions       | 5.606837 | 10       | 10     | BRXL1,HNRNPM,HNRNPJ,RPL23A,RPL35                            | RPL31,RPL36,RPS18,RPS19,RPS24,RPS56       |  |
| 13203 | Interaction | int:ESR1        | ESR1 interactions        | 5.488826 | 10       | 10     | DHX15,DHX30,HNRNPM,HSPA1L,GAL15,NOP2,RBBP6,RPL23            | EFSA,HNRNPM,RPL36,RPS18,RPS24,RPS56,SFQ   |  |
| 13204 | Interaction | int:RPS14       | RPS14 interactions       | 5.3728   | 10       | 10     | HNRNPM,HNRNPJ,RBBP6,RPL23A,RPL35                            | RPL31,RPL36,RPS18,RPS19,RPS24,RPS56       |  |
| 13205 | Interaction | int:RPS13       | RPS13 interactions       | 5.3728   | 10       | 10     | BRXL1,HNRNPM,HNRNPJ,RPL23A,RPL35                            | RPL31,RPL36,RPS18,RPS19,RPS24,RPS56       |  |
| 13206 | Interaction | int:RPS15A      | RPS15A interactions      | 5.3728   | 10       | 10     | HNRNPM,HNRNPJ,NOP2,RPA1,RPL23A,RPL35                        | RPL31,RPL36,RPS18,RPS19,RPS24,RPS56       |  |
| 13207 | Interaction | int:RPL28       | RPL28 interactions       | 5.32512  | 10       | 10     | HNRNPM,KIF11,RPL23A,RPL35                                   | RPL36,RPS18,RPS19,RPS56                   |  |
| 13208 | Interaction | int:RPL10L      | RPL10L interactions      | 5.26039  | 10       | 10     | HNRNPJ,RPA1,RPL23A,RPL35                                    | RPL31,RPL36,RPS19,RPS24,RPS56             |  |
| 13209 | Interaction | int:RPL8        | RPL8 interactions        | 5.23052  | 10       | 10     | DOX24,HNRNPJ,NOP2,RPL23A,RPL35                              | RPL31,RPL36,RPS18,RPS19,RPS24,RPS56       |  |
| 13210 | Interaction | int:CU4B        | CU4B interactions        | 5.123603 | 10       | 10     | DHX15,DHX30,HNRNPM,HSPA1L,RPL23A,RPL35                      | EEF1A2,HNRNPM,NAP1L1,RPL31,RPS18,RPS24,R  |  |
| 13211 | Interaction | int:RPS3A       | RPS3A interactions       | 4.903624 | 10       | 10     | HNRNPM,KIF11,RPA1,RPL23A,RPL35                              | NAP1L1,RPL31,RPL36,RPS18,RPS19,RPS24,RPS9 |  |
| 13212 | Interaction | int:MRTO4       | MRTO4 interactions       | 4.656197 | 10       | 10     | BRXL1,DOX24,HNRNPJ,NOP2,RPL23A                              | RPL31,RPS15,WDR12                         |  |
| 13213 | Interaction | int:RPL36       | RPL36 interactions       | 4.633304 | 10       | 10     | DHX15,HNRNPJ,RPL23A,RPL35                                   | RPL31,RPL36,RPS18,RPS19,RPS24,RPS56,WDR1  |  |
| 13214 | Interaction | int:RPL13A      | RPL13A interactions      | 4.576735 | 10       | 10     | HNRNPJ,RPL23A,RPL35                                         | RPL31,RPL36,RPS18,RPS19,RPS24,RPS56       |  |
| 13215 | Interaction | int:RPL2        | RPL2 interactions        | 4.507803 | 10       | 10     | DOX24,HNRNPJ,RPL23A,RPL35                                   | RPL31,RPL36,RPS18,RPS19,RPS24,RPS56       |  |
| 13216 | Interaction | int:RPS2        | RPS2 interactions        | 4.407055 | 10       | 10     | HNRNPM,HNRNPJ,NOP2,RPL23A,RPL35                             | RPL31,RPL36,RPS18,RPS19,RPS24,RPS56       |  |
| 13217 | Interaction | int:RPS26       | RPS26 interactions       | 4.354198 | 10       | 10     | HNRNPM,HNRNPJ,RPL23A,RPL35                                  | RPL31,RPL36,RPS18,RPS19,RPS24,RPS56       |  |
| 13218 | Interaction | int:RPS24       | RPS24 interactions       | 4.259317 | 10       | 10     | HNRNPM,HNRNPJ,RPL23A,RPL35                                  | RPL31,RPL36,RPS18,RPS19,RPS24,RPS56       |  |
| 13219 | Interaction | int:SRNA2       | SRNA2 interactions       | 4.245862 | 10       | 10     | DHX15,HNRNPH1,HNRNPM,HNRNPJ,SOSTM1,XRCC5                    | EEF1A2,HNRNPM,RPS15,SFQ                   |  |
| 13220 | Interaction | int:UBLA4       | UBLA4 interactions       | 4.23347  | 10       | 10     | HNRNPH1,HNRNPM,HNRNPJ,HSPA1L,RPL23A,RPL35                   | HNRNPM,RPL31,RPL36,RPS18,RPS19,RPS24,RPS  |  |
| 13221 | Interaction | int:RPL31       | RPL31 interactions       | 4.225117 | 10       | 10     | DHX15,HNRNPM,RPL23A,RPL35                                   | NAP1L1,RPL31,RPL36,RPS18,RPS19,RPS24,RPS9 |  |
| 13222 | Interaction | int:CEP250      | CEP250 interactions      | 4.014988 | 10       | 10     | DOX24,DHX15,HNRNPH1,HNRNPM,HNRNPJ,HSPA1L,NOP2,F             | RPL31,RPS18,RPS19,RPS56                   |  |
| 13223 | Interaction | int:RPL24       | RPL24 interactions       | 4.196987 | 10       | 10     | HNRNPJ,RPL23A,RPL35,XRCC5                                   | NAP1L1,RPL31,RPL36,RPS18,RPS19,RPS24,RPS9 |  |
| 13224 | Interaction | int:RPL3        | RPL3 interactions        | 4.155827 | 10       | 10     | HNRNPJ,HSPA1L,RPL23A,RPL35                                  | RPL31,RPL36,RPS18,RPS19,RPS24,RPS56       |  |
| 13225 | Interaction | int:ERG         | ERG interactions         | 4.142655 | 10       | 10     | HNRNPH1,HNRNPM,HNRNPJ,XRCC5,XRCC6                           | EEF1A2,RPS18,SFQ                          |  |
| 13226 | Interaction | int:RPS10       | RPS10 interactions       | 4.137233 | 10       | 10     | HNRNPJ,RPL23A,RPL35,XRCC6                                   | RPL31,RPL36,RPS18,RPS19,RPS24,RPS56       |  |
| 13227 | Interaction | int:RP99        | RP99 interactions        | 4.116102 | 10       | 10     | HNRNPJ,RPA1,RPL23A,RPL35                                    | RPL31,RPL36,RPS18,RPS19,RPS24,RPS56       |  |
| 13228 | Interaction | int:RPS11       | RPS11 interactions       | 4.105557 | 10       | 10     | DOX24,HNRNPJ,RPL23A,RPL35                                   | RPL31,RPL36,RPS18,RPS19,RPS24,RPS56       |  |
| 13229 | Interaction | int:RPS1        | RPS1 interactions        | 4.041133 | 10       | 10     | BRXL1,DOX24,DHX15,NOP2,PWP1                                 | NAP1L1,RPL31,WDR12                        |  |
| 13230 | Interaction | int:RPL9        | RPL9 interactions        | 4.033921 | 10       | 10     | HNRNPJ,RPA1,RPL23A,RPL35                                    | NAP1L1,RPL31,RPL36,RPS18,RPS19,RPS24,RPS9 |  |
| 13231 | Interaction | int:RCN1        | RCN1 interactions        | 3.98462  | 10       | 10     | HNRNPJ,KIF11,RPL23A,XRCC6                                   | HNRNPM,RPS19,RPS24,RPS56,SFQ              |  |
| 13232 | Interaction | int:RPS16       | RPS16 interactions       | 3.955755 | 10       | 10     | HNRNPM,HNRNPJ,RPL23A,RPL35                                  | RPL31,RPL36,RPS18,RPS19,RPS24,RPS56       |  |
| 13233 | Interaction | int:EBNA1BP2    | EBNA1BP2 interactions    | 3.934733 | 10       | 10     | BRXL1,DOX24,DHX15,HNRNPJ,NOL6,NOP2                          | RPL31,RPS56,WDR12                         |  |
| 13234 | Interaction | int:DOX18       | DOX18 interactions       | 3.896987 | 10       | 10     | BRXL1,DOX24,DHX15,HNRNPJ,NOL6,NOP2,PWP1                     | RPL36,RPS56,RRP15                         |  |
| 13235 | Interaction | int:RPS6KB2     | RPS6KB2 interactions     | 3.758726 | 10       | 10     | HNRNPM,HNRNPJ,RPL23A,XRCC5                                  | HNRNPM,RPS18,RPS19,RPS56,SFQ              |  |
| 13236 | Interaction | int:RPS21       | RPS21 interactions       | 3.727034 | 10       | 10     | HNRNPM,HNRNPJ,RPL23A                                        | RPL31,RPS18,RPS19,RPS24,RPS56             |  |
| 13237 | Interaction | int:RPS12       | RPS12 interactions       | 3.216177 | 10       | 10     | HNRNPJ,RPL23A,RPL35                                         | RPL31,RPL36,RPS18,RPS19,RPS24,RPS56       |  |
| 13238 | Interaction | int:RN2         | RN2 interactions         | 3.10227  | 10       | 10     | BMS1,DOX24,DHX30,HNRNPJ,NOL6,NOP2,PWP1,RPA1,RPL2            | RPL31,RPL36,RPS18,RPS19,RPS24,WDR12       |  |
| 13239 | Interaction | int:RPL35       | RPL35 interactions       | 3.194537 | 10       | 10     | HNRNPJ,RPL23A,RPL35                                         | RPL31,RPL36,RPS18,RPS19,RPS24,RPS56       |  |
| 13240 | Interaction | int:RPS27       | RPS27 interactions       | 3.142074 | 10       | 10     | HNRNPJ,RPL23A,RPL35                                         | RPL31,RPS18,RPS19,RPS24,RPS56             |  |
| 13241 | Interaction | int:RPLP1       | RPLP1 interactions       | 3.062618 | 10       | 10     | HNRNPJ,RPL23A,XRCC6                                         | RPL31,RPL36,RPS18,RPS19,RPS24,RPS56       |  |
| 13242 | Interaction | int:RPL17       | RPL17 interactions       | 3.024781 | 10       | 10     | HNRNPJ,RPL23A,RPL35                                         | NAP1L1,RPL31,RPL36,RPS18,RPS19,RPS24,RPS9 |  |
| 13243 | Interaction | int:RPL27A      | RPL27A interactions      | 3.024781 | 10       | 10     | HNRNPJ,RPL23A,RPL35                                         | RPL31,RPL36,RPS18,RPS19,RPS56             |  |
| 13244 | Interaction | int:RPL37A      | RPL37A interactions      | 2.997169 | 10       | 10     | KIF11,RPL23A,RPL35                                          | NAP1L1,RPL31,RPL36,RPS18,RPS19,RPS24,RPS9 |  |
| 13245 | Interaction | int:RPL21       | RPL21 interactions       | 2.952525 | 10       | 10     | HNRNPJ,RPL23A,RPL35                                         | RPL31,RPL36,RPS18,RPS19,RPS24,RPS56       |  |
| 13246 | Interaction | int:HNRNPA1     | HNRNPA1 interactions     | 2.8631   | 10       | 2.8631 | CALM5,DHX15,DHX30,HNRNPH1,HNRNPM,HNRNPJ,LGALS               | HNRNPM,PURA,RPS18,RPS56,SFQ               |  |
| 13247 | Interaction | int:RPS18       | RPS18 interactions       | 2.843778 | 10       | 10     | HNRNPJ,RPL23A,RPL35                                         | RPL31,RPL36,RPS18,RPS19,RPS24,RPS56       |  |
| 13248 | Interaction | int:RPS19       | RPS19 interactions       | 2.729573 | 10       | 10     | HNRNPJ,RPL23A,RPL35                                         | RPL31,RPL36,RPS18,RPS19,RPS24,RPS56       |  |
| 13249 | Interaction | int:IF2         | IF2 interactions         | 2.675031 | 10       | 10     | BRXL1,DHX30,HNRNPH1,HNRNPJ,NOP2,RPA1,RPL23A,XRCC5           | RPL31,RPS24,RPS56                         |  |
| 13250 | Interaction | int:SYNCRIP     | SYNCRIP interactions     | 2.630552 | 10       | 10     | DOX24,DHX15,HNRNPH1,HNRNPJ,NOP2,RPA1,RP                     | HNRNPM,RPS15,TXN                          |  |
| 13251 | Interaction | int:CSBL1       | CSBL1 interactions       | 2.616139 | 10       | 10     | DHX15,DHX15,DHX30,HNRNPH1,HNRNPJ,NOL6,NOP2,RPL23            | HNRNPM,RPS56,SFQ                          |  |
| 13252 | Interaction | int:CNBP        | CNBP interactions        | 2.514712 | 10       | 10     | BRXL1,RPL23A                                                | PURA,RPL31,RPL36,RPS19                    |  |
| 13253 | Interaction | int:GTPBP4      | GTPBP4 interactions      | 2.44936  | 10       | 10     | BRXL1,DOX24,HNRNPJ,KIF11,NOP2,PWP1                          | RPL36,WDR12                               |  |
| 13254 | Interaction | int:FAU         | FAU interactions         | 2.415937 | 10       | 10     | RPL23A,SOSTM1                                               | RPS18,RPS19,RPS24,RPS56                   |  |
| 13255 | Interaction | int:LOC10129876 | LOC10129876 interactions | 2.376988 | 10       | 10     | DHX15,HNRNPH1,RPL23A,RPL35                                  | RPL31,RPL36,RPS18,RPS19,RPS56             |  |
| 13256 | Interaction | int:TS13        | TS13 interactions        | 2.370906 | 10       | 10     | BRXL1,DOX24,HNRNPJ,NOP2,PWP1                                | RPL31,WDR12                               |  |
| 13257 | Interaction | int:NOPS8       | NOPS8 interactions       | 2.338309 | 10       | 10     | DOX24,DHX15,HNRNPJ,NOL6,NOP2                                | RPS24,RPS56                               |  |
| 13258 | Interaction | int:RPS3        | RPS3 interactions        | 2.329345 | 10       | 10     | HNRNPJ,RPL23A,RPL35                                         | NAP1L1,RPL31,RPL36,RPS18,RPS19,RPS24,RPS9 |  |
| 13259 | Interaction | int:HNRNP1      | HNRNP1 interactions      | 2.276773 | 10       | 10     | DHX15,HNRNPH1,HNRNPM,HNRNPJ,RPA1                            | HNRNPM,SFQ                                |  |
| 13260 | Interaction | int:RPA3        | RPA3 interactions        | 2.262895 | 10       | 10     | DHX15,DNAJC9,HNRNPM,HNRNPJ,RPA1,XRCC5,X                     | EEF1A2,HNRNPM,SFQ                         |  |
| 13261 | Interaction | int:SCARNA22    | SCARNA22 interactions    | 2.247664 | 10       | 10     | HNRNPH1,HNRNPM,HNRNPJ,XRCC5,XRCC6                           | HNRNPM,SFQ                                |  |
| 13262 | Interaction | int:RPL35A      | RPL35A interactions      | 2.165951 | 10       | 10     | RPL23A,RPL35                                                | RPL31,RPL36,RPS18,RPS19,RPS56             |  |
| 13263 | Interaction | int:RPA2        | RPA2 interactions        | 2.083356 | 10       | 10     | DHX15,DNAJC9,HNRNPH1,HNRNPM,HNRNPJ,RPA1,XRCC5,X             | EEF1A2,HNRNPM,SFQ                         |  |
| 13264 | Interaction | int:RPA1        | RPA1 interactions        | 2.010885 | 10       | 10     | DHX15,DNAJC9,HNRNPH1,HNRNPM,HNRNPJ,RPA1,XRCC5,X             | EEF1A2,HNRNPM,SFQ                         |  |
| 13265 | Interaction | int:RPS28       | RPS28 interactions       | 1.967818 | 10       | 10     | HNRNPJ,RPL23A                                               | RPL31,RPS18,RPS19,RPS24,RPS56             |  |
| 13266 | Interaction | int:RPS15       | RPS15 interactions       | 1.847876 | 10       | 10     | HNRNPJ,RPL23A                                               | RPL31,RPL36,RPS18,RPS19,RPS24,RPS56       |  |
| 13267 | Interaction | int:RPL38       | RPL38 interactions       | 1.8096   | 10       | 10     | RPL23A,RPL35                                                | RPL31,RPL36,RPS18,RPS19,RPS56             |  |
| 13268 | Interaction | int:TP53        | TP53 interactions        | 5.095562 | 5.720159 | 10     | HNRNPH1,HNRNPM,HNRNPJ,HSPA1L,RBBP6,RPA1,RPL23A,             | HNRNPM,NAP1L1,RPL31,RPS18,RPS19,RPS24,R   |  |
| 13269 | Interaction | int:DNX13       | DNX13 interactions       | 5.486461 | 4.813949 | 10     | DHX15,HNRNPM,HNRNPJ,RPL23A,XRCC6                            | HNRNPM,RPL31,RPS24,RPS56                  |  |
| 13270 | Interaction | int:NOCL2       | NOCL2 interactions       | 0        | 0        | 10     | DOX24,DHX15,HNRNPJ,NOL6,NOP2                                |                                           |  |
| 13271 | Interaction | int:MSH2        | MSH2 interactions        | 0        | 0        | 10     | DHX15,DNAJC9,RPA1,XRCC5,XRCC6                               |                                           |  |
| 13272 | Interaction | int:DOX24       | DOX24 interactions       | 0        | 0        | 10     | BRXL1,DOX24,HNRNPJ,NOL6,NOP2,PWP1,RBBP6                     |                                           |  |
| 13273 | Interaction | int:ER6         | ER6 interactions         | 0        | 0        | 10     |                                                             |                                           |  |
| 13274 | Interaction | int:NOCL1       | NOCL1 interactions       | 0        | 0        | 10     |                                                             |                                           |  |
| 13275 | Interaction | int:RPS20       | RPS20 interactions       | 0        | 0        | 10     |                                                             |                                           |  |
| 13276 | Interaction | int:HSPA5       | HSPA5 interactions       | 0        | 0        | 10     |                                                             |                                           |  |
| 13277 | Interaction | int:EEF2        | EEF2 interactions        | 0        | 0        | 10     |                                                             |                                           |  |
| 13278 | Interaction | int:PUM3        | PUM3 interactions        | 0        | 0        | 10     |                                                             |                                           |  |
| 13279 | Interaction | int:PRR11       | PRR11 interactions       | 0        | 0        | 10     | BRXL1,DOX24,DHX30,NOP2,PWP1,RPL23A                          |                                           |  |
| 13280 | Interaction | int:HDGF        | HDGF interactions        | 0        | 0        | 10     |                                                             |                                           |  |
| 13281 | Interaction | int:NOL6        | NOL6 interactions        | 0        | 0        | 10     | BMS1,BRXL1,DHX15,DHX30,HNRNPJ,NOP2,RPA1,RPL35,XRCC5,XRCC6   |                                           |  |
| 13282 | Interaction | int:RPS29       | RPS29 interactions       | 0        | 0        | 10     | DOX24,DHX15,HNRNPJ,NOL6,NOP2                                |                                           |  |
| 13283 | Interaction | int:R16         | R16 interactions         | 0        | 0        | 10     | BMS1,BRIL,DOX24,DHX30,HNRNPJ,LGALS7,NOL6,PWP1,SOSTM1        |                                           |  |
| 13284 | Interaction | int:MOV10       | MOV10 interactions       | 0        | 0        | 10     | DOX24,DHX15,DHX30,DNAJC9,HNRNPM,NOL6,NOP2,RPA1,SOSTM1,XRCC6 |                                           |  |
| 13285 | Interaction | int:NOCL3       | NOCL3 interactions       | 0        | 0        | 10     | BRXL1,DOX24,HNRNPJ,NOL6,NOP2                                |                                           |  |
| 13286 | Interaction | int:NOP2        | NOP2 interactions        | 0        | 0        | 10     | BRXL1,DOX24,HNRNPJ,NOL6,NOP2,RPL23A                         |                                           |  |
| 13287 | Interaction | int:NDK61       | NDK61 interactions       | 0        | 0        | 10     | DHX15,HNRNPH1,HNRNPJ,NOP2,RPA1,XRCC5,XRCC6                  |                                           |  |
| 13288 | Interaction | int:RBL         | RBL interactions         | 0        | 0        | 10     | BRXL1,DOX24,DHX15,HNRNPJ,NOL6,NOP2,PWP1,RPA1                |                                           |  |
| 13289 | Interaction | int:HUWE1       | HUWE1 interactions       | 0        | 0        | 10     |                                                             |                                           |  |
| 13290 | Interaction | int:N2          | N2 interactions          | 0        | 0        | 10     |                                                             |                                           |  |
| 13291 | Interaction | int:HST1H3E     | HST1H3E interactions     | 5.055175 | 4.466093 | 10     | CALM5,DHX15,DHX30,RPA1,XRCC5,XRCC6                          | HNRNPM,RPL31,RPL36,RPS18                  |  |
| 13292 | Interaction | int:RUPP6       | RUPP6 interactions       | 5.111268 | 5.812675 | 10     | HNRNPM,NOP2,RPL23A                                          | RPL31,RPS18,RPS24,RPS56                   |  |
| 13293 | Interaction | int:NCL         | NCL interactions         | 3.446752 | 5.638725 | 10     | DOX24,RPA1,XRCC5,XRCC6                                      | HNRNPM,NAP1L1,RPS19,RPS24,RPS56           |  |
| 13294 | Interaction | int:DNX9        | DNX9 interactions        | 4.762771 | 4.231163 | 10     | HNRNPM,HNRNPJ,RPA1,XRCC5,XRCC6                              | HNRNPM,RPL31,RPS24,RPS56                  |  |
| 13295 | Interaction | int:MCN5        | MCN5 interactions        | 4.744723 | 4.216596 | 10     | CALM5,DHX15,HNRNPJ,HSPA1L,NOP2                              | EEF1A2,HST1H2BL,HNRNPM,SFQ,TXN            |  |
| 13296 | Interaction | int:DCUN1D1     | DCUN1D1 interactions     | 4.70913  | 4.187849 | 10     | DNAJC9,HNRNPH1,HNRNPJ,NOP2,RPA1,RPL23A                      | EEF1A2,HNRNPM,RPS56,TXN                   |  |
| 13297 | Interaction | int:HNRNPM      | HNRNPM interactions      | 3.359584 | 5.525915 | 10     | HNRNPH1,HNRNPM,HNRNPJ,NOP2,RPA1,XRCC5,XRCC6                 | HNRNPM,RPL31,RPS24,RPS56,SFQ              |  |
| 13298 | Interaction | int:IF3         | IF3 interactions         | 3.968926 | 4.898582 | 10     | DHX30,HNRNPJ,RPA1,RPL23A,XRCC6                              | HNRNPM,RPL31,RPS24,RPS56,SFQ              |  |
| 13299 | Interaction | int:RAD21       | RAD21 interactions       | 3.314705 | 5.467645 | 10     | CALM5,HNRNPJ,RPA1,RPL23A                                    | NAP1L1,RPS18,RPS19,RPS56,SFQ              |  |
| 13300 | Interaction | int:ANSA1       | ANSA1 interactions       | 4.004158 | 4.74245  | 10     | HNRNPH1,HNRNPJ,XRCC5,XRCC6                                  | HNRNPM,RPL31,RPS18,SFQ                    |  |
| 13301 | Interaction | int:DOX27       | DOX27 interactions       | 4.062705 | 4.611768 | 10     | DOX24,HNRNPJ,RBBP6                                          | RPL31,RPS15,WDR12                         |  |
| 13302 | Interaction | int:NEO8        | NEO8 interactions        | 5.815288 | 2.730744 | 10     | HNRNPH1,HNRNPJ,HSPA1L,PWP1,RPL23A,RPL35                     | EEF1A2,HNRNPM,RPL31                       |  |
| 13303 | Interaction | int:RPL13       | RPL13 interactions       | 2.518038 | 5.987779 | 10     | HNRNPJ,RPL23A,RPL35                                         | RPL31,RPL36,RPS18,RPS19,RPS56             |  |
|       |             |                 |                          |          |          |        |                                                             |                                           |  |

|       |             |              |                       |          |            |             |                                           |                                      |  |
|-------|-------------|--------------|-----------------------|----------|------------|-------------|-------------------------------------------|--------------------------------------|--|
| 13339 | Interaction | int:UBC      | UBC interactions      | 2.494703 | 3.189411   | 10          | HNRNPM,HNRNPJ,RPL35,SQSTM1                | EEF1A2,RPS18,RPS24,RPS6              |  |
| 13340 | Interaction | int:HNRNP281 | HNRNP281 interactions | 3.827571 | 1.850607   | 10          | HNRNPH1,HNRNPJ,RPAL1,SQSTM1               | RPS19,SFQ                            |  |
| 13341 | Interaction | int:PP9F     | PP9F interactions     | 5.553106 | 0          | 10          | DXHX1,HNRNPM,HNRNPJ,NOP2,RPAL1            | RPS24,RPS6                           |  |
| 13342 | Interaction | int:MYBBP1A  | MYBBP1A interactions  | 3.260655 | 2.917277   | 10          | HNRNPJ,NOP2,RP23A                         | EEF1A2,RPS18                         |  |
| 13343 | Interaction | int:CEP57    | CEP57 interactions    | 3.238212 | 2.276733   | 10          | DXHX1,HNRNPJ,HSPA1L                       | RPL31,RPS19,RPS24,RPS6               |  |
| 13344 | Interaction | int:RPS27A   | RPS27A interactions   | 0        | 5.337061   | 10          |                                           |                                      |  |
| 13345 | Interaction | int:GRK5     | GRK5 interactions     | 5.336282 | 0          | 10          | BMS1,DXHX1,DXHK30,HNRNPJ,XRCC5            | RPL31,RPL36                          |  |
| 13346 | Interaction | int:PSTPIP1  | PSTPIP1 interactions  | 2.485262 | 2.839040   | 10          | RP23A,RPL35                               |                                      |  |
| 13347 | Interaction | int:BRX1     | BRX1 interactions     | 5.281689 | 0          | 10          | BRX1L,DXHX2,HNRNPJ,NOP2                   |                                      |  |
| 13348 | Interaction | int:CSNK2A1  | CSNK2A1 interactions  | 3.256702 | 1.983428   | 10          | BMS1,DXHX2,SQSTM1,XRCC5,XRCC6             | NAP1L1,RPS18,SFQ                     |  |
| 13349 | Interaction | int:DOX56    | DOX56 interactions    | 5.198076 | 0          | 10          | BRX1L,DXHX2,NOP2,RP23A                    | RPL36,RPS18,RPS6                     |  |
| 13350 | Interaction | int:RPL3L    | RPL3L interactions    | 0        | 5.179778   | 10          |                                           | EFSF,APL31,RPS19,RRP15,TXN           |  |
| 13351 | Interaction | int:EWSR1    | EWSR1 interactions    | 1.75239  | 3.385877   | 10          | PWP1,RBBP6,RPAL1,XRCC5                    |                                      |  |
| 13352 | Interaction | int:SNQ1     | SNQ1 interactions     | 5.118455 | 0          | 10          | HNRNPM,HNRNPJ,RP23A,RPL35                 |                                      |  |
| 13353 | Interaction | int:GAN      | GAN interactions      | 5.103848 | 0          | 10          | HNRNPH1,HNRNPJ,HNRNPJ,HSPA1L,KIF11        |                                      |  |
| 13354 | Interaction | int:LIN28A   | LIN28A interactions   | 5.042471 | 0          | 10          | BRX1,NOL6,NOP2,PWP1                       |                                      |  |
| 13355 | Interaction | int:TOP2A    | TOP2A interactions    | 4.952133 | 0          | 10          | HNRNPJ,NOP2,RPAL1,XRCC5                   |                                      |  |
| 13356 | Interaction | int:CEP76    | CEP76 interactions    | 2.871655 | 2.053204   | 10          | HNRNPH1,HNRNPJ,RP23A                      | EEF1A2,RPL31                         |  |
| 13357 | Interaction | int:DNAJC9   | DNAJC9 interactions   | 4.889944 | 0          | 10          | DXHX1,DNAJC9,RPAL1                        | HNRNPK,SFQ                           |  |
| 13358 | Interaction | int:SREK1    | SREK1 interactions    | 2.248232 | 2.599382   | 10          | HNRNPH1,HNRNPJ                            |                                      |  |
| 13359 | Interaction | int:DDX5     | DDX5 interactions     | 4.846081 | 0          | 10          | DXHX1,HNRNPH1,HNRNPM,HNRNPJ,RPAL1         | RPL31,RPS24,RPS6,WDR12               |  |
| 13360 | Interaction | int:TUFM     | TUFM interactions     | 0        | 4.793204   | 10          |                                           | HNRNPK,SFQ                           |  |
| 13361 | Interaction | int:RBM14    | RBM14 interactions    | 4.738021 | 0          | 10          | HNRNPH1,HNRNPJ,RPAL1,XRCC5                | HNRNPK,SFQ                           |  |
| 13362 | Interaction | int:SF3B3    | SF3B3 interactions    | 2.700919 | 1.918042   | 10          | DXHX1,HNRNPM,RPAL1                        | HNRNPK,SFQ                           |  |
| 13363 | Interaction | int:EEF1A1   | EEF1A1 interactions   | 0        | 4.578401   | 10          |                                           | HNRNPK,SFQ                           |  |
| 13364 | Interaction | int:PABP1    | PABP1 interactions    | 4.572761 | 0          | 10          | HNRNPH1,RPAL1,RPL35,XRCC5,XRCC6           | HNRNPK,SFQ                           |  |
| 13365 | Interaction | int:COP56    | COP56 interactions    | 2.01202  | 2.522309   | 10          | HNRNPH1,HSPA1L,PWP1                       | EEF1A2,RPL31,TXN                     |  |
| 13366 | Interaction | int:MEPCE    | MEPCE interactions    | 2.645646 | 1.881055   | 10          | HNRNPH1,HNRNPJ,KIF11                      | HNRNPK,PURA                          |  |
| 13367 | Interaction | int:MAST3    | MAST3 interactions    | 4.438811 | 0          | 10          | HNRNPM,XRCC5,XRCC6                        |                                      |  |
| 13368 | Interaction | int:SMARCA5  | SMARCA5 interactions  | 4.416449 | 0          | 10          | HNRNPM,HNRNPJ,RPAL1,XRCC5                 |                                      |  |
| 13369 | Interaction | int:SUPT16H  | SUPT16H interactions  | 4.416449 | 0          | 10          | DXHX1,HNRNPM,HNRNPJ,XRCC5                 |                                      |  |
| 13370 | Interaction | int:RPS27L   | RPS27L interactions   | 0        | 4.373581   | 10          |                                           | RPL31,RPS24,RPS6                     |  |
| 13371 | Interaction | int:CUL4A    | CUL4A interactions    | 4.347452 | 0          | 10          | DXHX1,HNRNPH1,HSPA1L,PWP1,RP23A           |                                      |  |
| 13372 | Interaction | int:PCDH2    | PCDH2 interactions    | 0        | 4.34670799 | 10          | DXHX1,HNRNPM,HNRNPJ                       |                                      |  |
| 13373 | Interaction | int:NSA2     | NSA2 interactions     | 4.32706  | 0          | 10          | BRX1L,DOX24,NOP2                          |                                      |  |
| 13374 | Interaction | int:RP2      | RP2 interactions      | 4.274685 | 0          | 10          | DOX24,DXHX1,NOP2                          |                                      |  |
| 13375 | Interaction | int:RBM39    | RBM39 interactions    | 4.191631 | 0          | 10          | HNRNPJ,RPAL1,XRCC5,XRCC6                  |                                      |  |
| 13376 | Interaction | int:CHD1L    | CHD1L interactions    | 4.17604  | 0          | 10          | RPAL1,XRCC5,XRCC6                         |                                      |  |
| 13377 | Interaction | int:RRP12    | RRP12 interactions    | 3.999312 | 0          | 10          | BRX1L,DOX24,HNRNPJ                        |                                      |  |
| 13378 | Interaction | int:PYM1     | PYM1 interactions     | 0        | 3.96889597 | 10          |                                           | RPS18,RPS19,RPS24,RPS6               |  |
| 13379 | Interaction | int:KRR1     | KRR1 interactions     | 3.958766 | 0          | 10          | DOX24,HNRNPJ,NOP2                         |                                      |  |
| 13380 | Interaction | int:LYAR     | LYAR interactions     | 3.958766 | 0          | 10          | BRX1L,HNRNPJ,RP23A                        |                                      |  |
| 13381 | Interaction | int:SUZ12    | SUZ12 interactions    | 3.933115 | 0          | 10          | DXHK3,DNAJC9,LSG15,NOP2,XRCC5             |                                      |  |
| 13382 | Interaction | int:PTEN     | PTEN interactions     | 0        | 3.883641   | 10          |                                           | EEF1A2,RPL31,RPS6,TXN                |  |
| 13383 | Interaction | int:FNX1LBP  | FNX1LBP interactions  | 3.862807 | 0          | 10          | DXHK3,HNRNPM,HNRNPJ                       |                                      |  |
| 13384 | Interaction | int:NAP1L1   | NAP1L1 interactions   | 0        | 3.756468   | 10          |                                           | NAP1L1,RPL31,RPS6                    |  |
| 13385 | Interaction | int:SUMO2    | SUMO2 interactions    | 3.64505  | 0          | 10          | HNRNPH1,NOP2,XRCC5,XRCC6                  |                                      |  |
| 13386 | Interaction | int:RPL32    | RPL32 interactions    | 3.627868 | 0          | 10          | HNRNPH1,NOP2,XRCC5,XRCC6                  |                                      |  |
| 13387 | Interaction | int:HSPE1    | HSPE1 interactions    | 3.613163 | 0          | 10          | HNRNPH1,HNRNPJ,RPAL1,SQSTM1,XRCC5         |                                      |  |
| 13388 | Interaction | int:CEPNA    | CEPNA interactions    | 3.612676 | 0          | 10          | HNRNPM,RPAL1,XRCC5                        |                                      |  |
| 13389 | Interaction | int:HST1H2AD | HST1H2AD interactions | 0        | 3.552344   | 10          |                                           | RPS24,RPS6                           |  |
| 13390 | Interaction | int:H2AFX    | H2AFX interactions    | 3.546412 | 0          | 10          | DXHK3,HSPA1L,XRCC5,XRCC6                  |                                      |  |
| 13391 | Interaction | int:MYC      | MYC interactions      | 3.528829 | 0          | 10          | DOX24,DXHX1,HNRNPJ,SQSTM1,XRCC5,XRCC6     |                                      |  |
| 13392 | Interaction | int:RPS10P5  | RPS10P5 interactions  | 0        | 3.487224   | 10          |                                           | NAP1L1,RPS24                         |  |
| 13393 | Interaction | int:EBF3CL   | EBF3CL interactions   | 2.910351 | 5.286211   | 5.203470138 | RP23A,RPL35                               | RPL36,RPS18,RPS19,RPS23,RPS4X        |  |
| 13394 | Interaction | int:DNCL1    | DNCL1 interactions    | 3.392096 | 0          | 10          | DOX24,DXHX1,NOP2                          |                                      |  |
| 13395 | Interaction | int:DNOS2    | DNOS2 interactions    | 0        | 3.385967   | 10          |                                           | NAP1L1,RPL31,RPS18                   |  |
| 13396 | Interaction | int:ARBB1    | ARBB1 interactions    | 3.372725 | 0          | 10          | HNRNPH1,HNRNPJ,HNRNPJ,XRCC5               |                                      |  |
| 13397 | Interaction | int:TMPO     | TMPO interactions     | 3.354819 | 0          | 10          | RPAL1,RPL35,XRCC5                         |                                      |  |
| 13398 | Interaction | int:ZC3H3    | ZC3H3 interactions    | 3.249381 | 0          | 10          | BRX1L,DOX24,NOP2                          |                                      |  |
| 13399 | Interaction | int:HNRNPJ   | HNRNPJ interactions   | 3.187343 | 0          | 10          | DXHK3,HNRNPH1,HNRNPJ,RPAL1                |                                      |  |
| 13400 | Interaction | int:XP01     | XP01 interactions     | 0        | 3.16007    | 10          |                                           | EFSF,HNRNPK,NAP1L1,RPS18,RPS6,WDR12  |  |
| 13401 | Interaction | int:SO1      | SO1 interactions      | 3.152385 | 0          | 10          | HNRNPM,HSPA1L,SQSTM1                      |                                      |  |
| 13402 | Interaction | int:DCC      | DCC interactions      | 0        | 3.133137   | 10          |                                           | RPS24,RPS6                           |  |
| 13403 | Interaction | int:PNK1     | PNK1 interactions     | 2.841024 | 5.179778   | 5.027224879 | DXHX1,RP23A                               | RPL10A,RPL11,RPL23,RPL35,RPS13,RPS4X |  |
| 13404 | Interaction | int:DOX1     | DOX1 interactions     | 3.034128 | 0          | 10          | HNRNPM,HNRNPJ,RPAL1                       | RPL31,RPS19,TXN                      |  |
| 13405 | Interaction | int:CEBG1    | CEBG1 interactions    | 5.118455 | 2.486778   | 5.384505034 | HNRNPH1,HNRNPJ,HNRNPJ,RPAL1               | RPL10A,RPL23,RPL35,RPS13,RPS4X       |  |
| 13406 | Interaction | int:BRCA1    | BRCA1 interactions    | 2.987575 | 0          | 10          | DOX24,NOP2,RPAL1,XRCC5,XRCC6              | HNRNPK,SFQ                           |  |
| 13407 | Interaction | int:BAZ1A    | BAZ1A interactions    | 2.910351 | 0          | 10          | XRCC5,XRCC6                               |                                      |  |
| 13408 | Interaction | int:HNRNPJ   | HNRNPJ interactions   | 4.75354  | 2.306961   | 5.823594713 | HNRNPH1,HNRNPJ,HNRNPJ,RPAL1               | RPL36,WDR12                          |  |
| 13409 | Interaction | int:TCF3     | TCF3 interactions     | 0        | 2.845528   | 10          |                                           | EEF1A2,EFSF,APL31                    |  |
| 13410 | Interaction | int:HDAC5    | HDAC5 interactions    | 2.82272  | 0          | 10          | DXHX1,NOP2,XRCC5,XRCC6                    |                                      |  |
| 13411 | Interaction | int:RPL29    | RPL29 interactions    | 0        | 2.78257    | 10          |                                           | RPS24,RPS6                           |  |
| 13412 | Interaction | int:FBX06    | FBX06 interactions    | 2.760819 | 0          | 10          | DXHX1,HNRNPH1,HNRNPJ,KIF11,RPAL1          |                                      |  |
| 13413 | Interaction | int:DOT1L    | DOT1L interactions    | 2.756689 | 0          | 10          | HNRNPM,HNRNPJ                             |                                      |  |
| 13414 | Interaction | int:SP1      | SP1 interactions      | 0        | 2.740292   | 10          |                                           | NAP1L1,PURA,SFQ                      |  |
| 13415 | Interaction | int:WDR76    | WDR76 interactions    | 2.717509 | 0          | 10          | XRCC5,XRCC6                               |                                      |  |
| 13416 | Interaction | int:DIMT1    | DIMT1 interactions    | 2.680086 | 0          | 10          | HNRNPJ,RP23A                              |                                      |  |
| 13417 | Interaction | int:RNPS1    | RNPS1 interactions    | 2.672953 | 0          | 10          | HNRNPM,HNRNPJ,RP23A                       |                                      |  |
| 13418 | Interaction | int:WATC2    | WATC2 interactions    | 2.605856 | 0          | 10          | RPAL1,XRCC5,XRCC6                         |                                      |  |
| 13419 | Interaction | int:MDCL1    | MDCL1 interactions    | 2.592892 | 0          | 10          | HNRNPJ,RPAL1,XRCC5                        |                                      |  |
| 13420 | Interaction | int:SGO1     | SGO1 interactions     | 2.576963 | 0          | 10          | XRCC5,XRCC6                               |                                      |  |
| 13421 | Interaction | int:BCOP     | BCOP interactions     | 2.560956 | 0          | 10          | DOX24,HNRNPJ                              |                                      |  |
| 13422 | Interaction | int:DYRK4    | DYRK4 interactions    | 2.560956 | 0          | 10          | HNRNPJ,RPAL1                              |                                      |  |
| 13423 | Interaction | int:AUKA     | AUKA interactions     | 0        | 2.518342   | 10          |                                           | EEF1A2,HNRNPK,RPS19                  |  |
| 13424 | Interaction | int:TRIM29   | TRIM29 interactions   | 0        | 2.516004   | 10          |                                           | RPS18,RPS19                          |  |
| 13425 | Interaction | int:RSL1D1   | RSL1D1 interactions   | 2.499856 | 0          | 10          | HNRNPJ,NOP2                               |                                      |  |
| 13426 | Interaction | int:THAP7    | THAP7 interactions    | 2.44297  | 0          | 10          | DOX24,NOP2                                |                                      |  |
| 13427 | Interaction | int:TOP2B    | TOP2B interactions    | 2.352014 | 0          | 10          | RPAL1,XRCC5                               |                                      |  |
| 13428 | Interaction | int:XRCC5    | XRCC5 interactions    | 2.349971 | 0          | 10          | RPAL1,XRCC5,XRCC6                         |                                      |  |
| 13429 | Interaction | int:MYH10    | MYH10 interactions    | 2.327782 | 0          | 10          | HNRNPM,RPAL1                              |                                      |  |
| 13430 | Interaction | int:IL7R     | IL7R interactions     | 0        | 2.322484   | 10          |                                           | PURA,RPL31                           |  |
| 13431 | Interaction | int:RBM10    | RBM10 interactions    | 2.31593  | 0          | 10          | DXHX1,RPAL1                               |                                      |  |
| 13432 | Interaction | int:WVCK     | WVCK interactions     | 2.29966  | 0          | 10          | DXHX1,DXHK30,HNRNPJ                       |                                      |  |
| 13433 | Interaction | int:MGMT     | MGMT interactions     | 2.259131 | 0          | 10          | DOX24,XRCC6                               |                                      |  |
| 13434 | Interaction | int:PRKDC    | PRKDC interactions    | 2.240981 | 0          | 10          | RPAL1,XRCC5,XRCC6                         |                                      |  |
| 13435 | Interaction | int:PAXIP1   | PAXIP1 interactions   | 2.203868 | 0          | 10          | NOP2,RPAL1,XRCC6                          |                                      |  |
| 13436 | Interaction | int:LMNB1    | LMNB1 interactions    | 2.146641 | 0          | 10          | HNRNPM,RPAL1                              |                                      |  |
| 13437 | Interaction | int:XRCC6    | XRCC6 interactions    | 2.124695 | 0          | 10          | RPAL1,XRCC5,XRCC6                         |                                      |  |
| 13438 | Interaction | int:LUZP4    | LUZP4 interactions    | 2.118507 | 0          | 10          | RPAL1,RPL35                               |                                      |  |
| 13439 | Interaction | int:FBX032   | FBX032 interactions   | 0        | 2.0243     | 10          |                                           | HNRNPK,RPS19                         |  |
| 13440 | Interaction | int:EFZAK2   | EFZAK2 interactions   | 2.01494  | 0          | 10          | DXHK30,NOP2                               |                                      |  |
| 13441 | Interaction | int:SFQ      | SFQ interactions      | 0        | 1.93279    | 10          |                                           | SFQ,TXN                              |  |
| 13442 | Interaction | int:WHNAE    | WHNAE interactions    | 0        | 1.921646   | 10          |                                           | EEF1A2,RPL3A,SFQ                     |  |
| 13443 | Interaction | int:SEN3     | SEN3 interactions     | 1.916185 | 0          | 10          | DXHX1,XRCC5                               |                                      |  |
| 13444 | Interaction | int:FBX025   | FBX025 interactions   | 0        | 1.832897   | 10          |                                           | EEF1A2,NAP1L1                        |  |
| 13445 | Interaction | int:CDX8     | CDX8 interactions     | 1.8906   | 0          | 10          | HNRNPJ,NOP2                               |                                      |  |
| 13446 | Interaction | int:DOX17    | DOX17 interactions    | 4.236435 | 3.43621    | 3.932880635 | DXHX1,HNRNPH1,RPAL1,XRCC5                 | EFSF,HNRNPK,SFQ                      |  |
| 13447 | Interaction | int:CRY1     | CRY1 interactions     | 2.952525 | 3.488595   | 4.973128885 | HNRNPH1,HNRNPJ,XRCC5                      | HNRNPK,SFQ,TXN                       |  |
| 13448 | Interaction | int:MAGEB2   | MAGEB2 interactions   | 0        | 5.625252   | 5.766891489 |                                           | RPL31,RPL36,RPS19                    |  |
| 13449 | Interaction | int:HNRNP40  | HNRNP40 interactions  | 4.900204 | 2.379262   | 3.996051187 | HNRNPH1,HNRNPJ,HNRNPJ,RPAL1               | HNRNPK,RPS6                          |  |
| 13450 | Interaction | int:HNRNP43  | HNRNP43 interactions  | 3.238212 | 2.276773   | 5.70606767  | HNRNPH1,HNRNPJ,RPAL1                      | HNRNPK,SFQ                           |  |
| 13451 | Interaction | int:MACROD1  | MACROD1 interactions  | 5.83063  | 0          | 5.32836186  | HNRNPJ,XRCC5,XRCC6                        | HNRNPK,SFQ                           |  |
| 13452 | Interaction | int:PNKP     | PNKP interactions     | 5.776826 | 0          | 5.290477629 | HNRNPJ,RPAL1,XRCC5,XRCC6                  |                                      |  |
| 13453 | Interaction | int:SF3A1    | SF3A1 interactions    | 4.148039 | 2.008219   | 4.677934526 | DXHX1,HNRNPM,HNRNPJ,RPAL1                 | HNRNPK,SFQ                           |  |
| 13454 | Interaction | int:PTBP1    | PTBP1 interactions    | 1.822149 | 3.610368   | 5.278576342 | HNRNPJ,RPAL1                              | HNRNPJ,RPS36,SFQ                     |  |
| 13455 | Interaction | int:NP7      | NP7 interactions      | 5.021418 | 0          | 5.687761549 | DOX24,HNRNPJ,NOP2                         |                                      |  |
| 13456 | Interaction | int:NFA      | NFA interactions      | 2.756689 | 3.112696   | 4.814230406 | HNRNPJ,NOP2                               | RPS24,RPS6                           |  |
| 13457 | Interaction | int:EFFUD2   | EFFUD2 interactions   | 2.952525 | 3.488595   | 4.044717317 | HNRNPM,HNRNPJ,RPAL1                       | EEF1A2,HNRNPK,SFQ                    |  |
| 13458 | Interaction | int:RRP7A    | RRP7A interactions    | 4.409934 | 0          | 5.984295255 | HNRNPM,HNRNPJ,NOL6                        |                                      |  |
| 13459 | Interaction | int:MRN11    | MRN11 interactions    | 4.662548 | 0          | 5.649034606 | HNRNPM,HNRNPJ,RPAL1,XRCC6                 |                                      |  |
| 13460 | Interaction | int:RBM28    | RBM28 interactions    | 4.381702 | 0          | 5.907588186 | HNRNPJ,NOP2                               |                                      |  |
| 13461 | Interaction | int:YBX1     | YBX1 interactions     | 2.586465 | 1.841435   | 5.810489714 | HNRNPJ,RBBP6,RP23A                        | HNRNPK,PURA                          |  |
| 13462 | Interaction | int:CRY2     | CRY2 interactions     | 2.867977 | 3.402487   | 3.861204969 | DXHX1,HNRNPM,XRCC5                        | EEF1A2,HNRNPK,RPS6                   |  |
| 13463 | Interaction | int:UBR2     | UBR2 interactions     | 5.585738 | 0          | 4.511491554 | DOX24,HNRNPM,HNRNPJ,NOL6,NOP2,RBBP6,XRCC5 |                                      |  |
| 13464 | Interaction | int:SG15     | SG15 interactions     | 3.676698 | 1.77561    | 4.631862219 | HNRNPJ,SQSTM1,XRCC5,XRCC6                 | EEF1A2,HNRNPK                        |  |
| 13465 | Interaction | int:CtcfP50  | CtcfP50 interactions  | 0        | 0          | 0           |                                           |                                      |  |
| 13466 | Interaction | int:ZBTB1    | ZBTB1 interactions    |          |            |             |                                           |                                      |  |

[illegible]



[illegible]

|       |             |               |                        |          |          |             |                    |                                             |
|-------|-------------|---------------|------------------------|----------|----------|-------------|--------------------|---------------------------------------------|
| 13919 | Interaction | int:RGRIP1L   | RGRIP1L interactions   | 0        | 1.837154 | 1.85051017  | RP519,RP56         | RP111,RP10,RP11,RP519,RP54X                 |
| 13920 | Interaction | int:SRP8      | SRP8 interactions      | 0        | 0        | 3.681306581 |                    | RP131,SRP14,SRP68,SRP72                     |
| 13921 | Interaction | int:ED1       | ED1 interactions       | 0        | 0        | 3.681306581 |                    | HIST1H2BB,HIST1H4A,RP12,XPCC6               |
| 13922 | Interaction | int:LRACS9    | LRACS9 interactions    | 0        | 0        | 3.681306581 |                    | CSNK2A1,HNRNPML,ILF3,MYH11                  |
| 13923 | Interaction | int:SPATS2    | SPATS2 interactions    | 3.680436 | 0        | 0           | HNRNP,XP11         |                                             |
| 13924 | Interaction | int:IGHMBP2   | IGHMBP2 interactions   | 3.680436 | 0        | 0           | HNRNP,HNRNP        |                                             |
| 13925 | Interaction | int:CDK1      | CDK1 interactions      | 0        | 0        | 3.669570572 |                    | BANF1,HIST3H3,HSPB1,RP12,XPCC6              |
| 13926 | Interaction | int:NCM43     | NCM43 interactions     | 0        | 0        | 3.665491602 |                    | CSNK2A1,HIST1H4A,ILF3,XPCC6,SRP1            |
| 13927 | Interaction | int:NCSTN     | NCSTN interactions     | 1.828501 | 0        | 0           | 1.817722007        | HNRNP,NOP2,RP131,5MARCA5,SSRP1              |
| 13928 | Interaction | int:KHDRB52   | KHDRB52 interactions   | 0        | 0        | 3.642148933 |                    | HNRNP,HNRNP,H1,GF2BP3,ILF3,YBK1             |
| 13929 | Interaction | int:BTTF3     | BTTF3 interactions     | 0        | 0        | 3.639189017 |                    | CSNK2A2,RP10,RP10,RP12,RP29                 |
| 13930 | Interaction | int:PAK5B     | PAK5B interactions     | 0        | 0        | 3.639189017 |                    | CDCT73,RP10,RP1,XPCC6                       |
| 13931 | Interaction | int:MYH14     | MYH14 interactions     | 0        | 0        | 3.639189017 |                    | CDCT73,MYL12A,MYL6,MYL6B                    |
| 13932 | Interaction | int:TPX2      | TPX2 interactions      | 0        | 0        | 3.639189017 |                    | RPB1,RP1A,RP2A,RP3A                         |
| 13934 | Interaction | int:RPL36A    | RPL36A interactions    | 1.728757 | 1.900591 | 0           | HNRNP              |                                             |
| 13935 | Interaction | int:TXNDC16   | TXNDC16 interactions   | 3.622829 | 0        | 0           | HNRNP,RP135        | NAP1L1                                      |
| 13935 | Interaction | int:CSF7      | CSF7 interactions      | 0        | 0        | 3.615134927 |                    |                                             |
| 13936 | Interaction | int:CALR      | CALR interactions      | 1.815849 | 0        | 1.795513719 | HNRNP,RP1A         | CSNK2A1,RP1A,RP1A,RP2A,RP519                |
| 13937 | Interaction | int:SERPINB12 | SERPINB12 interactions | 0        | 0        | 3.609752936 |                    | CDCT73,HSPB1,RP1A,RP3A                      |
| 13938 | Interaction | int:SLC1A2    | SLC1A2 interactions    | 0        | 0        | 3.609752936 |                    | RP1A,RP2A,RP3A                              |
| 13939 | Interaction | int:RBX1      | RBX1 interactions      | 0        | 0        | 3.609752936 |                    | RP123A,RP13,RP15                            |
| 13940 | Interaction | int:SAT1      | SAT1 interactions      | 0        | 0        | 3.598551789 |                    | RP1A,RP2A,RP3A                              |
| 13941 | Interaction | int:MRPL4     | MRPL4 interactions     | 0        | 0        | 3.566085155 |                    | CSNK2A1,CSNK2A2,HSPB1,HSPB1,RP1,RP1         |
| 13942 | Interaction | int:GEMIN5    | GEMIN5 interactions    | 0        | 0        | 3.56228639  |                    | C10BP,CSNK2A1,DOXA4,ILF3,RP18,RP518         |
| 13943 | Interaction | int:DNA2      | DNA2 interactions      | 0        | 0        | 3.552907378 |                    | RP1A,RP2A,RP3A                              |
| 13944 | Interaction | int:CA51      | CA51 interactions      | 0        | 0        | 3.552907378 |                    | DOXA4,EFG,GNL3                              |
| 13945 | Interaction | int:NEMF      | NEMF interactions      | 0        | 0        | 3.552907378 |                    | DOXA4,RP10,RP11                             |
| 13946 | Interaction | int:ESR2      | ESR2 interactions      | 0        | 0        | 3.527643487 |                    | HSPB8,NCOR1,RP10,RP518,RP54X                |
| 13947 | Interaction | int:UZSURP    | UZSURP interactions    | 0        | 0        | 3.519317483 |                    | MYO1C,RP1A,RP2A,RP3A                        |
| 13948 | Interaction | int:WAPL      | WAPL interactions      | 0        | 0        | 3.519317483 |                    | RP1A,RP2A,RP3A,RP10                         |
| 13949 | Interaction | int:CDK11     | CDK11 interactions     | 3.518087 | 0        | 0           | DOXA4,HNRNP        |                                             |
| 13950 | Interaction | int:TPB3      | TPB3 interactions      | 0        | 0        | 3.48991919  |                    | MYL9,RP12,RP13A,RP12A,RP13,RP10             |
| 13951 | Interaction | int:SCAMP3    | SCAMP3 interactions    | 0        | 0        | 3.481351385 |                    | CDCT73,RP1A,RP2A,RP3A                       |
| 13952 | Interaction | int:LAMP2     | LAMP2 interactions     | 0        | 0        | 3.481351385 |                    | DOXA4,HSPB8,IMP10,RP11,SRP14                |
| 13953 | Interaction | int:CCB1      | CCB1 interactions      | 0        | 0        | 3.464377295 |                    | DOXA4,RP10,RP12                             |
| 13954 | Interaction | int:DOX55     | DOX55 interactions     | 0        | 0        | 3.460608696 |                    | DOXA4,RP10,RP12                             |
| 13955 | Interaction | int:GT2H3     | GT2H3 interactions     | 0        | 0        | 3.460608696 |                    | RP1A,RP2A,RP3A                              |
| 13956 | Interaction | int:RM1       | RM1 interactions       | 0        | 0        | 3.460608696 |                    | RP1A,RP2A,RP3A                              |
| 13957 | Interaction | int:POLM7     | POLM7 interactions     | 0        | 0        | 3.434627185 |                    |                                             |
| 13958 | Interaction | int:USP7      | USP7 interactions      | 0        | 0        | 3.431835822 |                    | HNRNP,MYL12A,MYL6,MYL6B,MYO1C,TPM1          |
| 13959 | Interaction | int:LARP1     | LARP1 interactions     | 0        | 0        | 3.412467967 |                    | CSNK2A1,RP10,RP513,RP518,RP54X              |
| 13960 | Interaction | int:PTMA      | PTMA interactions      | 0        | 0        | 3.412467967 |                    | HIST1H4A,HIST3H3,HSPA1A,NCL,NCOR1           |
| 13961 | Interaction | int:EF48      | EF48 interactions      | 0        | 0        | 3.412467967 |                    | CSNK2A1,HSPB1,IMP10,RP12,XPCC6              |
| 13962 | Interaction | int:RAB14     | RAB14 interactions     | 0        | 0        | 3.408137042 |                    | ILF3,RP1A,RP2A,RP3A                         |
| 13963 | Interaction | int:FOXP1     | FOXP1 interactions     | 0        | 0        | 3.408137042 |                    | MYH10,MYL9,RP2A,RP3A                        |
| 13964 | Interaction | int:FYCD1     | FYCD1 interactions     | 0        | 0        | 3.408137042 |                    | EMD,RP1A,RP2A,RP3A                          |
| 13965 | Interaction | int:ZNF638    | ZNF638 interactions    | 0        | 0        | 3.408137042 |                    | PURA,RP1A,RP2A,RP3A                         |
| 13966 | Interaction | int:YTHDF1    | YTHDF1 interactions    | 0        | 0        | 3.408137042 |                    | RP1A,RP2A,RP3A,RP10                         |
| 13967 | Interaction | int:WPC9      | WPC9 interactions      | 0        | 0        | 3.392361803 |                    | RP1A,RP2A,RP3A                              |
| 13968 | Interaction | int:MYL9      | MYL9 interactions      | 0        | 0        | 3.392361803 |                    | HSPB1,MYL12A,MYL9                           |
| 13969 | Interaction | int:MAP2K5    | MAP2K5 interactions    | 3.381712 | 0        | 0           | SQSTM1,XPCC6       | DOXA4,EFG,NCOR1,RP12                        |
| 13970 | Interaction | int:CDT2      | CDT2 interactions      | 0        | 0        | 3.372809522 |                    | BANF1,CSNK2A2,RP1A,RP2A,RP3A                |
| 13971 | Interaction | int:APC       | APC interactions       | 0        | 0        | 3.372809522 |                    | CSNK2A1,CSNK2A2,RP515,WDOR12                |
| 13972 | Interaction | int:CA502     | CA502 interactions     | 0        | 0        | 3.372809522 |                    |                                             |
| 13973 | Interaction | int:LRKK1     | LRKK1 interactions     | 0        | 3.370213 | 0           |                    | HNRNP,NCAP11                                |
| 13974 | Interaction | int:CALM1     | CALM1 interactions     | 0        | 0        | 3.349091551 |                    |                                             |
| 13975 | Interaction | int:CEP162    | CEP162 interactions    | 0        | 0        | 3.34574629  |                    |                                             |
| 13976 | Interaction | int:MRP127    | MRP127 interactions    | 3.340703 | 0        | 0           | HNRNP,XP11         | CSNK2A1,CSNK2A2,RP518,RP54X,SRP1            |
| 13977 | Interaction | int:WDOR4     | WDOR4 interactions     | 0        | 0        | 3.338286489 |                    | HIST1H2AB,HIST1H2BB,HIST1H4A,SRP14          |
| 13978 | Interaction | int:CAVIN1    | CAVIN1 interactions    | 0        | 0        | 3.338286489 |                    | DBN1,HNRNP,H1,ILF3,RP54X                    |
| 13979 | Interaction | int:ADNP      | ADNP interactions      | 0        | 0        | 3.338286489 |                    | EBNA1BP2,EMD,HIST3H3,RPB1                   |
| 13980 | Interaction | int:METTL21A  | METTL21A interactions  | 0        | 0        | 3.32774844  |                    | HSPA1A,HSP2A,HSPA8                          |
| 13981 | Interaction | int:HIST1H2AA | HIST1H2AA interactions | 0        | 0        | 3.32774844  |                    | HIST1H2AA,HIST1H2BB,RP54X                   |
| 13982 | Interaction | int:TMEM33    | TMEM33 interactions    | 0        | 0        | 3.32774844  |                    | RP1A,RP2A,RP3A                              |
| 13983 | Interaction | int:PNPO      | PNPO interactions      | 0        | 0        | 3.32774844  |                    | HSPB1,MTFR1,MYO1C                           |
| 13984 | Interaction | int:RAB13     | RAB13 interactions     | 0        | 0        | 3.32774844  |                    | RP1A,RP2A,RP3A                              |
| 13985 | Interaction | int:MYOF      | MYOF interactions      | 0        | 0        | 3.32774844  |                    | RP1A,RP2A,RP3A                              |
| 13986 | Interaction | int:ALP       | ALP interactions       | 0        | 0        | 3.32774844  |                    | RP1A,RP2A,RP3A                              |
| 13987 | Interaction | int:FMR1      | FMR1 interactions      | 0        | 0        | 3.304534341 |                    | NCL,PURA,RP10,YBK1                          |
| 13988 | Interaction | int:BDP1      | BDP1 interactions      | 0        | 0        | 3.304534341 |                    | GNL3,NOP2,RP130,WDOR12                      |
| 13989 | Interaction | int:HLTF      | HLTF interactions      | 0        | 0        | 3.304534341 |                    | HSPB8,RP1A,RP2A,RP3A                        |
| 13990 | Interaction | int:MCME6     | MCME6 interactions     | 0        | 0        | 3.296591793 |                    | EMD,HIST1H4A,HSPB1,RP1A,SRP1                |
| 13991 | Interaction | int:MOGS      | MOGS interactions      | 3.291911 | 0        | 0           |                    |                                             |
| 13992 | Interaction | int:SLC18A2   | SLC18A2 interactions   | 0        | 0        | 3.275724335 |                    | CSNK2A1,CSNK2A2                             |
| 13993 | Interaction | int:EFCA814   | EFCA814 interactions   | 0        | 0        | 3.275724335 |                    | CSNK2A1,CSNK2A2                             |
| 13994 | Interaction | int:RNFP207   | RNFP207 interactions   | 0        | 0        | 3.275724335 |                    | HSPA1A,HSPA8                                |
| 13995 | Interaction | int:UBASH3B   | UBASH3B interactions   | 3.272034 | 0        | 0           | HNRNP,HNRNP,HSPA11 |                                             |
| 13996 | Interaction | int:TRIP12    | TRIP12 interactions    | 0        | 0        | 3.271521538 |                    | GNL3,RP1A,RP2A,RP3A                         |
| 13997 | Interaction | int:GCF2      | GCF2 interactions      | 0        | 0        | 3.266412029 |                    | CSNK2A1,CSNK2A2,HNRNP                       |
| 13998 | Interaction | int:PRP42C    | PRP42C interactions    | 0        | 0        | 3.266412029 |                    | CSNK2A1,CSNK2A2,MYH9                        |
| 13999 | Interaction | int:CRY2      | CRY2 interactions      | 0        | 0        | 3.266412029 |                    | CSNK2A2,GF2BP3,TUBA4A                       |
| 14000 | Interaction | int:TUBB      | TUBB interactions      | 0        | 0        | 3.255545685 |                    | EMD,HSPA1A,HSPA8,RP1A,RP2A,RP3A,TUBA4A,YBK1 |
| 14001 | Interaction | int:DNAJC7    | DNAJC7 interactions    | 0        | 0        | 3.252297539 |                    | HNRNP,HSPA1A,HSPA2,HSPA8,TPM1               |
| 14002 | Interaction | int:NAPA      | NAPA interactions      | 0        | 0        | 3.239218437 |                    | HSPB1,RP1A,RP2A,RP3A                        |
| 14003 | Interaction | int:POSSA     | POSSA interactions     | 0        | 0        | 3.239218437 |                    | DOXA4,RP1A,RP2A,RP3A                        |
| 14004 | Interaction | int:MRP57     | MRP57 interactions     | 0        | 0        | 3.239218437 |                    | C10BP,RP11,RP123A,RP18                      |
| 14005 | Interaction | int:RELA      | RELA interactions      | 0        | 0        | 3.238950977 |                    |                                             |
| 14006 | Interaction | int:MCME4     | MCME4 interactions     | 0        | 0        | 3.209099529 |                    | EMD,HIST1H4A,RP1A,RP2A,SRP1                 |
| 14007 | Interaction | int:SLC25A6   | SLC25A6 interactions   | 0        | 0        | 3.209099529 |                    | RP10,RP10A,RP10B,RP17A,RP10P6               |
| 14008 | Interaction | int:ARG1      | ARG1 interactions      | 0        | 0        | 3.208046099 |                    | RP1A,RP2A,RP3A                              |
| 14009 | Interaction | int:CORO2A    | CORO2A interactions    | 0        | 0        | 3.208046099 |                    | DBN1,MYO1C,NCOR1                            |
| 14010 | Interaction | int:CELF1     | CELF1 interactions     | 0        | 0        | 3.208046099 |                    | RP1A,RP2A,RP3A                              |
| 14011 | Interaction | int:GNL1      | GNL1 interactions      | 0        | 0        | 3.208046099 |                    | RP12,RP17,RP10                              |
| 14012 | Interaction | int:NEEN      | NEEN interactions      | 0        | 0        | 3.208046099 |                    | DBN1,HSPB1,MYO1C                            |
| 14013 | Interaction | int:G1BP1     | G1BP1 interactions     | 3.205309 | 0        | 0           | HNRNP,NOL6,RP135   |                                             |
| 14014 | Interaction | int:KOA2013   | KOA2013 interactions   | 3.193969 | 0        | 0           | HNRNP,HSPA11       |                                             |
| 14015 | Interaction | int:PRR3      | PRR3 interactions      | 3.193969 | 0        | 0           | HNRNP,XP11         |                                             |
| 14016 | Interaction | int:ACTB      | ACTB interactions      | 0        | 0        | 3.190490422 |                    |                                             |
| 14017 | Interaction | int:RAD50     | RAD50 interactions     | 0        | 0        | 3.187896564 |                    | HIST1H2A,ILF3,RP1A,RP2A,RP3A,TPM1           |
| 14018 | Interaction | int:MRP55     | MRP55 interactions     | 0        | 0        | 3.176613167 |                    | C10BP,ILF3,RP13,RP123                       |
| 14019 | Interaction | int:SPP1      | SPP1 interactions      | 0        | 0        | 3.166949991 |                    | CSNK2A1,CSNK2A2,RP13,RP15,RP513             |
| 14020 | Interaction | int:MSK2      | MSK2 interactions      | 3.160929 | 0        | 0           | XPCC6,XPCC6        |                                             |
| 14021 | Interaction | int:SUPT1H1   | SUPT1H1 interactions   | 0        | 0        | 3.152385304 |                    | CSNK2A1,NCL,XPCC6                           |
| 14022 | Interaction | int:RNU12     | RNU12 interactions     | 0        | 0        | 3.152385304 |                    | DOXA4,SNRPD3,YBK1                           |
| 14023 | Interaction | int:USP16     | USP16 interactions     | 0        | 0        | 3.152385304 |                    | HIST1H2AB,HIST1H2BB,GF2BP3                  |
| 14024 | Interaction | int:CHUK      | CHUK interactions      | 0        | 0        | 3.147509354 |                    | CDCT73,CSNK2A1,HIST3H3,HSPA1A,MYL12A,NCOR1  |
| 14025 | Interaction | int:PPM1A     | PPM1A interactions     | 0        | 0        | 3.146296323 |                    | HNRNP,HSPB1,RP10,XPCC6                      |
| 14026 | Interaction | int:ASCC2     | ASCC2 interactions     | 0        | 0        | 3.146296323 |                    | GNL3,RP1A,RP1,RP519                         |
| 14027 | Interaction | int:CCNH      | CCNH interactions      | 0        | 0        | 3.146296323 |                    | PURA,RP1A,RP2A,RP3A                         |
| 14028 | Interaction | int:PSPC1     | PSPC1 interactions     | 0        | 3.113317 | 0           |                    | SFQ1,WDOR12                                 |
| 14029 | Interaction | int:GZMB      | GZMB interactions      | 3.129128 | 0        | 0           | XPCC6,XPCC6        |                                             |
| 14030 | Interaction | int:PCDH7     | PCDH7 interactions     | 3.129128 | 0        | 0           | HNRNP,XPCC6        |                                             |
| 14031 | Interaction | int:UTP20     | UTP20 interactions     | 3.129128 | 0        | 0           | NOL6,PWP1          |                                             |
| 14032 | Interaction | int:RAB10     | RAB10 interactions     | 0        | 0        | 3.110568594 |                    | CDCT73,RP1A,RP2A,RP3A                       |
| 14033 | Interaction | int:SET       | SET interactions       | 0        | 0        | 3.116353573 |                    | BANF1,CSNK2A1,CSNK2A2,HIST1H4A,MTFR1,XPCC6  |
| 14034 | Interaction | int:INVS      | INVS interactions      | 0        | 0        | 3.105594521 |                    | HNRNP,HSPA8,HSPA15A,TPM1,TUBA4A             |
| 14035 | Interaction | int:DNAJB14   | DNAJB14 interactions   | 0        | 0        | 3.101731757 |                    | HSPA2,HSPA8                                 |
| 14036 | Interaction | int:AQP4      | AQP4 interactions      | 0        | 0        | 3.101731757 |                    | CSNK2A1,CSNK2A2                             |
| 14037 | Interaction | int:CHTF18    | CHTF18 interactions    | 0        | 0        | 3.099198368 |                    | RP1A,RP2A,RP3A                              |
| 14038 | Interaction | int:PKBP15    | PKBP15 interactions    | 0        | 0        | 3.099198368 |                    | RP1A,RP2A,RP3A                              |
| 14039 | Interaction | int:TOPA      | TOPA interactions      | 0        | 0        | 3.099198368 |                    | RP1A,RP2A,RP3A                              |
| 14040 | Interaction | int:WASDC1    | WASDC1 interactions    | 0        | 0        | 3.099198368 |                    | RP1A,RP2A,RP3A                              |
| 14041 | Interaction | int:NVL       | NVL interactions       | 0        | 0        | 3.099198368 |                    | HSPB1,RP13,RP15                             |
| 14042 | Interaction | int:ASB10     | ASB10 interactions     | 0        | 0        | 3.099198368 |                    | EMD,HSPA1A,HSPB1                            |
| 14043 | Interaction | int:WDOR2     | WDOR2 interactions     | 0        | 0        | 3.087426049 |                    | HSPA8,RP1A,RP2A,RP3A                        |
| 14044 | Interaction | int:MYB       | MYB interactions       | 0        | 0        | 3.087426049 |                    | CSNK2A1,NCL,NCOR1,RP14                      |
| 14045 | Interaction | int:MYL6      | MYL6 interactions      | 0        | 0        | 3.087426049 |                    | MYH11,MYL12A,MYL6,MYL6B                     |
| 14046 | Interaction | int:SSR3      | SSR3 interactions      | 0        | 0        | 3.087426049 |                    | DOXA4,RP10A,RP15,RP12                       |
| 14047 | Interaction | int:SF3A2     | SF3A2 interactions     | 0        | 0        | 3.08569619  |                    | DOXA4,HSPA8,ILF3,SNRPD3,SNRPE,YBK1          |
| 14048 | Interaction | int:PTG53     | PTG53 interactions     | 0        | 0        | 3.08569619  |                    | HSPA1A,HSPB1,RP15,RP123,RP14                |
| 14049 | Interaction | int:NDK4      | NDK4 interactions      | 3.068899 | 0        | 0           | XPCC6,XPCC6        |                                             |
| 14050 | Interaction | int:ZNF707    | ZNF707 interactions    | 0        | 0        | 3.058847739 |                    | C10BP,CSNK2A1,RP10A,RP15                    |
| 14051 | Interaction | int:CHERP     | CHERP interactions     | 0        | 0        | 3.058847739 |                    | MYO1C,RP1A,RP2A,RP3A                        |
| 14052 | Interaction | int:OTUB1     | OTUB1 interactions     | 0        | 0        | 3.055617242 |                    |                                             |
| 14053 | Interaction | int:RNU11     | RNU11 interactions     | 0        | 0        | 3.048282486 |                    | MYL9,CSNK2A1,CSNK2A2,HSPB1,RP1A,RP2A,RP3A   |
| 14054 | Interaction | int:RBM27     | R                      |          |          |             |                    |                                             |

|       |             |              |                       |          |          |              |                     |            |                                                 |
|-------|-------------|--------------|-----------------------|----------|----------|--------------|---------------------|------------|-------------------------------------------------|
| 14064 | Interaction | int:WDR26    | WDR26 interactions    | 0        | 3.017297 | 0            | DNAIC5,HNRNP1       | RP524,RP56 |                                                 |
| 14065 | Interaction | int:TS7A3    | TS7A3 interactions    | 3.012674 | 0        | 0            |                     |            |                                                 |
| 14066 | Interaction | int:MTM2A    | MTM2A interactions    | 0        | 0        | 3.007982089  | 0                   |            | CCD73,CSNK2A2,HIST1H4A,HIST3H3,NCL              |
| 14067 | Interaction | int:HDAC2    | HDAC2 interactions    | 0        | 0        | 3.005942356  | 0                   |            | HSPB1,MYL12A,RP11,RP123                         |
| 14068 | Interaction | int:UQC8B    | UQC8B interactions    | 0        | 0        | 3.003305492  | 0                   |            | RP1A,RP2A,RP3,SSBP1                             |
| 14069 | Interaction | int:INTS3    | INTS3 interactions    | 0        | 0        | 3.003305492  | 0                   |            | IFJ3,NOP2,RP124,RP511                           |
| 14070 | Interaction | int:MPHOSPH8 | MPHOSPH8 interactions | 0        | 0        | 3.003305492  | 0                   |            | RP1A,RP2A,RP3                                   |
| 14071 | Interaction | int:ERGIC1   | ERGIC1 interactions   | 0        | 0        | 2.99945883   | 0                   |            | RP1A,RP2A,RP3                                   |
| 14072 | Interaction | int:RAB6B    | RAB6B interactions    | 0        | 0        | 2.99945883   | 0                   |            | CSNK2A1,CSNK2A2,EIF6,RP1A,RP13,RP15,SSRP1,WDR12 |
| 14073 | Interaction | int:CSNK2B   | CSNK2B interactions   | 0        | 0        | 2.998583887  | 0                   |            | CSNK2A1,CSNK2A2,HSPA1A,RP1A,RP2A,RP3,TPB1       |
| 14074 | Interaction | int:SNCA     | SNCA interactions     | 0        | 0        | 2.995431748  | 0                   |            |                                                 |
| 14075 | Interaction | int:SHR73    | SHR73 interactions    | 2.985906 | 0        | 0            | HSPA11,XRCC6        |            |                                                 |
| 14076 | Interaction | int:ELF3     | ELF3 interactions     | 2.985906 | 0        | 0            | XRCC5,XRCC6         |            |                                                 |
| 14077 | Interaction | int:CLF1     | CLF1 interactions     | 0        | 0        | 2.982129384  | 0                   |            | CCD73,DBN1,EIF6,HSP1,MYCB,MYO1C                 |
| 14078 | Interaction | int:ADD1     | ADD1 interactions     | 0        | 0        | 2.976304884  | 0                   |            | MYO1C,RP1A,RP2A,RP3                             |
| 14079 | Interaction | int:SF3B4    | SF3B4 interactions    | 0        | 0        | 2.970457571  | 0                   |            | HNRNP0,HNRNP1,ILF3,NCL,SSBP1                    |
| 14080 | Interaction | int:TYMS     | TYMS interactions     | 0        | 2.96481  | 0            | 0                   |            |                                                 |
| 14081 | Interaction | int:ATF2     | ATF2 interactions     | 0        | 0        | 2.960151029  | 0                   |            |                                                 |
| 14082 | Interaction | int:RCC11    | RCC11 interactions    | 2.959961 | 0        | 0            | HNRNP1,RBP6         |            |                                                 |
| 14083 | Interaction | int:CCO      | CCO interactions      | 0        | 0        | 2.957701214  | 0                   |            | HSPB1,RP2A                                      |
| 14084 | Interaction | int:LSMAN2   | LSMAN2 interactions   | 0        | 0        | 2.95256891   | 0                   |            | RP1A,RP2A,RP3                                   |
| 14085 | Interaction | int:TRIM38   | TRIM38 interactions   | 0        | 0        | 2.95256891   | 0                   |            | HSPA1A,HSPA2,HSPB8                              |
| 14086 | Interaction | int:CAP2B    | CAP2B interactions    | 0        | 0        | 2.952003541  | 0                   |            | CCD73,DBN1,HSPA8,MYH11,TM003                    |
| 14087 | Interaction | int:FUBP3    | FUBP3 interactions    | 0        | 0        | 2.94979504   | 0                   |            | HNRNP0,RP1A,RP2A,RP3                            |
| 14088 | Interaction | int:MRPS27   | MRPS27 interactions   | 0        | 0        | 2.94979504   | 0                   |            | C1QB,RP13,RP10,RP113                            |
| 14089 | Interaction | int:HAUS1    | HAUS1 interactions    | 0        | 0        | 2.933750089  | 0                   |            | HNRNP1,HSPA1A,HSPA2,HSPB1,TUBAA4                |
| 14090 | Interaction | int:BAP1     | BAP1 interactions     | 0        | 0        | 2.9323759834 | 0                   |            | HIST1H2AB,HIST1H4A,HSPA1A,HSPA2                 |
| 14091 | Interaction | int:RPS6KA3  | RPS6KA3 interactions  | 0        | 0        | 2.9323759834 | 0                   |            | HIST3H3,HNRNP1,HSPA8,YBK1                       |
| 14092 | Interaction | int:HDAC3    | HDAC3 interactions    | 0        | 0        | 2.9323759834 | 0                   |            | EIF6,H1FX,NCOR1,NOP2                            |
| 14093 | Interaction | int:HCF13    | HCF13 interactions    | 0        | 0        | 2.935693341  | 0                   |            | HSPA1A,HSPA8,RP1A,RP2A,RP3                      |
| 14094 | Interaction | int:C21orf59 | C21orf59 interactions | 2.910351 | 0        | 0            | CALML5,HNRNP1       |            |                                                 |
| 14095 | Interaction | int:VP5378   | VP5378 interactions   | 0        | 0        | 2.907471598  | 0                   |            | CCD73,WDR12,YBK1                                |
| 14096 | Interaction | int:KIF1C    | KIF1C interactions    | 0        | 0        | 2.907471598  | 0                   |            | CSNK2A1,CSNK2A2,HSPA8                           |
| 14097 | Interaction | int:DNTT1P1  | DNTT1P1 interactions  | 0        | 0        | 2.907471598  | 0                   |            | RP1A,RP2A,RP3                                   |
| 14098 | Interaction | int:TMN13    | TMN13 interactions    | 0        | 0        | 2.898183921  | 0                   |            | DBN1,MYO1C,RP1A,RP3,RP24                        |
| 14099 | Interaction | int:STMN1    | STMN1 interactions    | 0        | 0        | 2.898183921  | 0                   |            | CSNK2A1,HSPA8,HSPB1,MYL6                        |
| 14100 | Interaction | int:RAB1A    | RAB1A interactions    | 0        | 0        | 2.897684876  | 0                   |            | CCD73,DBN1,RP1A,RP2A,RP3,SSRP1                  |
| 14101 | Interaction | int:CD37     | CD37 interactions     | 0        | 0        | 2.891377545  | 0                   |            | CSNK2A1,CSNK2A2,HSPA8,RP1A,RP2A,RP3             |
| 14102 | Interaction | int:TERF2P   | TERF2P interactions   | 2.88441  | 0        | 0            | DDX24,XRCC5,XRCC6   |            |                                                 |
| 14103 | Interaction | int:MMG171   | MMG171 interactions   | 0        | 0        | 2.880155261  | 0                   |            | DHX15,IMP1H,IMP2H,RBM6,RP511                    |
| 14104 | Interaction | int:TIAL1    | TIAL1 interactions    | 0        | 0        | 2.873052688  | 0                   |            | RP1A,RP2A,RP3,SSBP1                             |
| 14105 | Interaction | int:TAF15    | TAF15 interactions    | 0        | 0        | 2.873052688  | 0                   |            | HIST3H3,RP1A,RP2A,RP3                           |
| 14106 | Interaction | int:STOM     | STOM interactions     | 0        | 0        | 2.873052688  | 0                   |            | DBN1,NHRNP1,ILF3,RP13A                          |
| 14107 | Interaction | int:PPAP6    | PPAP6 interactions    | 2.867977 | 0        | 0            | KIF11,XRCC5,XRCC6   |            |                                                 |
| 14108 | Interaction | int:MAPKAPK5 | MAPKAPK5 interactions | 0        | 0        | 2.864040678  | 0                   |            | HSPB1,MYH11,RP13                                |
| 14109 | Interaction | int:RECQL    | RECQL interactions    | 0        | 0        | 2.864040678  | 0                   |            | BANF1,RBP1,RP1A                                 |
| 14110 | Interaction | int:AP2B1    | AP2B1 interactions    | 0        | 0        | 2.862666823  | 0                   |            | DBN1,HSPB1,RP1A,RP2A,RP3                        |
| 14111 | Interaction | int:KIF2C    | KIF2C interactions    | 0        | 0        | 2.848352207  | 0                   |            | HIST3H3,RBP1,RP5,RP17                           |
| 14112 | Interaction | int:USM2     | USM2 interactions     | 0        | 0        | 2.848352207  | 0                   |            | EMD,ILF3,SSRP1,SSRP1                            |
| 14113 | Interaction | int:RAB8A    | RAB8A interactions    | 0        | 0        | 2.848352207  | 0                   |            | CCD73,RP1A,RP2A,RP3                             |
| 14114 | Interaction | int:RBBP7    | RBBP7 interactions    | 0        | 0        | 2.843450707  | 0                   |            | BANF1,GNL1,HIST1H4A,HIST3H3,HSPA1A,SMARCA5      |
| 14115 | Interaction | int:CDKN1A   | CDKN1A interactions   | 0        | 0        | 2.842547464  | 0                   |            | CSNK2A1,HSPA2,HSPA8,RP1A,RP2A,RP3               |
| 14116 | Interaction | int:PCOL     | PCOL interactions     | 2.841024 | 0        | 0            | IGHA1,RP1A          |            |                                                 |
| 14117 | Interaction | int:TM4SF1   | TM4SF1 interactions   | 0        | 0        | 2.834858782  | 0                   |            | HSPA8,TUBAA4                                    |
| 14118 | Interaction | int:TRAF3P1  | TRAF3P1 interactions  | 0        | 0        | 2.824069195  | 0                   |            | HSPA1A,HSPA8,RP1A,RP2A,RP17                     |
| 14119 | Interaction | int:THOCS    | THOCS interactions    | 0        | 0        | 2.824069195  | 0                   |            | CSNK2A1,DDX24,HSPB1,RP127A                      |
| 14120 | Interaction | int:CLTC     | CLTC interactions     | 0        | 0        | 2.823817426  | 0                   |            | CCD73,IMP1,IMP2,HSPA1A,RP1A,RP2A,RP3,XRCC5      |
| 14121 | Interaction | int:ZNF346   | ZNF346 interactions   | 0        | 0        | 2.822162819  | 0                   |            | EBNA1BP2,ILF3,STA12                             |
| 14122 | Interaction | int:SCAF4    | SCAF4 interactions    | 0        | 0        | 2.822162819  | 0                   |            | RP1A,RP2A,RP3                                   |
| 14123 | Interaction | int:MLST8    | MLST8 interactions    | 2.819132 | 0        | 0            | KIF11,SQSTM1        |            |                                                 |
| 14124 | Interaction | int:LIMS1    | LIMS1 interactions    | 2.819132 | 0        | 0            | HNRNP1,XRCC5        |            |                                                 |
| 14125 | Interaction | int:ICP2     | ICP2 interactions     | 0        | 2.810333 | 0            | 0                   |            | EEF1A2,EEF5A                                    |
| 14126 | Interaction | int:FLJ      | FLJ interactions      | 0        | 0        | 2.800190973  | 0                   |            | DBN1,HNRNP1,IGF2BP3,MYO1C                       |
| 14127 | Interaction | int:TADA3    | TADA3 interactions    | 0        | 0        | 2.800190973  | 0                   |            | HIST3H3,HSPA8,MYO1C,XRCC6                       |
| 14128 | Interaction | int:TAGLN2   | TAGLN2 interactions   | 0        | 0        | 2.794505363  | 0                   |            | CCD73,HSP1,RP1A,RP2A,RP3                        |
| 14129 | Interaction | int:PIGDOH   | PIGDOH interactions   | 0        | 0        | 2.794505363  | 0                   |            | CCD73,HSP1,MYL6,SMARCA5,SSRP1                   |
| 14130 | Interaction | int:YWN42    | YWN42 interactions    | 0        | 0        | 2.784696989  | 0                   |            |                                                 |
| 14131 | Interaction | int:PPP1R10  | PPP1R10 interactions  | 0        | 0        | 2.781735872  | 0                   |            | RP1A,RP2A,RP3                                   |
| 14132 | Interaction | int:SMNDC1   | SMNDC1 interactions   | 0        | 0        | 2.781735872  | 0                   |            | DDX21,HIST3H3,RP13                              |
| 14133 | Interaction | int:HMG2A    | HMG2A interactions    | 0        | 0        | 2.781735872  | 0                   |            | CSNK2A1,CSNK2A2,XRCC6                           |
| 14134 | Interaction | int:USP45    | USP45 interactions    | 0        | 0        | 2.781735872  | 0                   |            | MYH10,MYL6,TM003                                |
| 14135 | Interaction | int:ZEF1     | ZEF1 interactions     | 0        | 0        | 2.781735872  | 0                   |            | MYCB,RPS4,XRCC5                                 |
| 14136 | Interaction | int:STRBP    | STRBP interactions    | 0        | 0        | 2.781735872  | 0                   |            | RP1A,RP2A,RP3                                   |
| 14137 | Interaction | int:HOGF12   | HOGF12 interactions   | 0        | 0        | 2.781735872  | 0                   |            | CSNK2A1,CSNK2A2,MYO1C                           |
| 14138 | Interaction | int:KLVL     | KLVL interactions     | 2.77699  | 0        | 0            | KIF11,XRCC6         |            |                                                 |
| 14139 | Interaction | int:SMC2     | SMC2 interactions     | 0        | 0        | 2.77670543   | 0                   |            | RP1A,RP2A,RP3,YBK1                              |
| 14140 | Interaction | int:RALA     | RALA interactions     | 0        | 0        | 2.77670543   | 0                   |            | HSPB1,ILF3,MYH10,MYO1C                          |
| 14141 | Interaction | int:SNRNP40  | SNRNP40 interactions  | 0        | 0        | 2.77670543   | 0                   |            | RP1A,RP2A,RP3,SNRPE                             |
| 14142 | Interaction | int:SRSF1    | SRSF1 interactions    | 2.758948 | 0        | 0            | DHX15,HNRNP1,HNRNP1 |            |                                                 |
| 14143 | Interaction | int:LSR      | LSR interactions      | 2.756689 | 0        | 0            | DHX15,HNRNP1        |            |                                                 |
| 14144 | Interaction | int:ATP5VD1  | ATP5VD1 interactions  | 0        | 0        | 2.753600988  | 0                   |            | RP1A,RP2A,RP3,RP15                              |
| 14145 | Interaction | int:DOX23    | DOX23 interactions    | 0        | 0        | 2.753600988  | 0                   |            | PURA,RP1A,RP2A,RP3                              |
| 14146 | Interaction | int:CLTB     | CLTB interactions     | 0        | 0        | 2.753600988  | 0                   |            | CSNK2A1,CSNK2A2,DBN1,HSP1E                      |
| 14147 | Interaction | int:CDK3     | CDK3 interactions     | 0        | 0        | 2.74517826   | 0                   |            | BANF1,HIST1H4A,HIST3H3,HSP1,XRCC6               |
| 14148 | Interaction | int:CNPO     | CNPO interactions     | 0        | 0        | 2.74266745   | 0                   |            | HIST1H4A,RP10A,RP511                            |
| 14149 | Interaction | int:RAB35    | RAB35 interactions    | 0        | 0        | 2.74266745   | 0                   |            | RP1A,RP2A,RP3                                   |
| 14150 | Interaction | int:KNSTRN   | KNSTRN interactions   | 0        | 0        | 2.74266745   | 0                   |            | HSPA1A,HSPA8,HSPB1                              |
| 14151 | Interaction | int:MSH3     | MSH3 interactions     | 0        | 0        | 2.74266745   | 0                   |            | RP1A,RP2A,RP3                                   |
| 14152 | Interaction | int:EGGDK    | EGGDK interactions    | 0        | 2.742578 | 0            | 0                   |            | EEF1A2,HIST1H2BL                                |
| 14153 | Interaction | int:ZBTB38   | ZBTB38 interactions   | 2.73687  | 0        | 0            | DDX24,RBP6          |            |                                                 |
| 14154 | Interaction | int:NAA15    | NAA15 interactions    | 2.73687  | 0        | 0            | XRCC5,XRCC6         |            |                                                 |
| 14155 | Interaction | int:TXNDC5   | TXNDC5 interactions   | 0        | 0        | 2.730866579  | 0                   |            | DBN1,IMP1H,RBP1,RP2A                            |
| 14156 | Interaction | int:MART     | MART interactions     | 0        | 0        | 2.729061835  | 0                   |            | AITF,CSNK2A1,HSPA1A,HSPA8,TUBAA4                |
| 14157 | Interaction | int:ZNF618   | ZNF618 interactions   | 0        | 0        | 2.727809426  | 0                   |            | HSPA8,RP11                                      |
| 14158 | Interaction | int:ZFAND2A  | ZFAND2A interactions  | 0        | 0        | 2.727809426  | 0                   |            | HSPA8,RP130                                     |
| 14159 | Interaction | int:TRIM28   | TRIM28 interactions   | 0        | 0        | 2.718787303  | 0                   |            | EMO,HIST3H3,NCOR1,PABP2,RP1A,RP2A,RP3           |
| 14160 | Interaction | int:EXOSC5   | EXOSC5 interactions   | 0        | 2.716941 | 0            | 0                   |            | RPL36,SFPQ                                      |
| 14161 | Interaction | int:LIN28B   | LIN28B interactions   | 0        | 0        | 2.70487372   | 0                   |            | PURA,PURB,RP18                                  |
| 14162 | Interaction | int:LMNC41   | LMNC41 interactions   | 0        | 0        | 2.70487372   | 0                   |            | RP1A,RP2A,RP3                                   |
| 14163 | Interaction | int:RBM5     | RBM5 interactions     | 0        | 0        | 2.70487372   | 0                   |            | DHX15,ILF3,MYO1C                                |
| 14164 | Interaction | int:SNRPO2   | SNRPO2 interactions   | 0        | 0        | 2.697301286  | 0                   |            | DHX15,SNRPO3,SNRPE,SRP14,YBK1                   |
| 14165 | Interaction | int:PSMB1    | PSMB1 interactions    | 0        | 0        | 2.697301286  | 0                   |            | RP10A,RP24,RP15,RP17A,RP523                     |
| 14166 | Interaction | int:TRIC     | TRIC interactions     | 0        | 0        | 2.686465911  | 0                   |            | CCD73,RP1A,RP2A,RP3                             |
| 14167 | Interaction | int:USP3     | USP3 interactions     | 0        | 0        | 2.668278373  | 0                   |            | DHX15,HIST1H2AB,HIST1H2BB                       |
| 14168 | Interaction | int:TOP3B    | TOP3B interactions    | 0        | 0        | 2.668278373  | 0                   |            | C1QB,RP1A,RP10                                  |
| 14169 | Interaction | int:IARS2    | IARS2 interactions    | 0        | 0        | 2.668278373  | 0                   |            | HNRNP1,HSPB1,ILF3                               |
| 14170 | Interaction | int:PN4      | PN4 interactions      | 0        | 0        | 2.668278373  | 0                   |            | CSNK2A1,CSNK2A2,RP519                           |
| 14171 | Interaction | int:AS2      | AS2 interactions      | 0        | 0        | 2.668278373  | 0                   |            | HNRNP0,HNRNP1,SSRP1                             |
| 14172 | Interaction | int:IL16     | IL16 interactions     | 0        | 0        | 2.668278373  | 0                   |            | CSNK2A1,CSNK2A2,HSPA8                           |
| 14173 | Interaction | int:CAV1     | CAV1 interactions     | 0        | 0        | 2.665415383  | 0                   |            | CSNK2A1,CSNK2A2,DBN1,RP1A,RP2A,RP3              |
| 14174 | Interaction | int:SEPT7    | SEPT7 interactions    | 0        | 0        | 2.664779779  | 0                   |            | MYH10,MYO1C,SMARCA5,SRP14                       |
| 14175 | Interaction | int:CEP164   | CEP164 interactions   | 0        | 0        | 2.664779779  | 0                   |            | AITF,DDX24,EBNA1BP2,SSRP1                       |
| 14176 | Interaction | int:BCAP31   | BCAP31 interactions   | 0        | 0        | 2.664779779  | 0                   |            | MYH10,RP1A,RP2A,RP3                             |
| 14177 | Interaction | int:DOK47    | DOK47 interactions    | 2.661986 | 0        | 0            | HNRNP1,NOP2         |            |                                                 |
| 14178 | Interaction | int:ESR8B    | ESR8B interactions    | 0        | 0        | 2.653349203  | 0                   |            |                                                 |
| 14179 | Interaction | int:EF2B3    | EF2B3 interactions    | 2.644271 | 0        | 0            | HNRNP1,HNRNP1       |            |                                                 |
| 14180 | Interaction | int:CHD2     | CHD2 interactions     | 0        | 0        | 2.643423881  | 0                   |            | DBN1,RP121,RP13,RP18                            |
| 14181 | Interaction | int:EF3B     | EF3B interactions     | 0        | 0        | 2.643423881  | 0                   |            | CSNK2A2,EIF6,MYO1C,RPLP06                       |
| 14182 | Interaction | int:ACTN4    | ACTN4 interactions    | 0        | 0        | 2.635596652  | 0                   |            | CCD73,DBN1,HSPB1,HSPB1,MYO1CTPM1                |
| 14183 | Interaction | int:GABR1    | GABR1 interactions    | 0        | 0        | 2.632993336  | 0                   |            | C1QB,RP13,RP511                                 |
| 14184 | Interaction | int:DOX1     | DOX1 interactions     | 0        | 0        | 2.632993336  | 0                   |            | MYO1C,RP124                                     |
| 14185 | Interaction | int:ATXN10   | ATXN10 interactions   | 0        | 0        | 2.632811758  | 0                   |            | HSPA1A,HSPA8,HSPB1                              |
| 14186 | Interaction | int:MRP17    | MRP17 interactions    | 0        | 0        | 2.632811758  | 0                   |            | ILF3,RP13,RP523                                 |
| 14187 | Interaction | int:CDKSRAP3 | CDKSRAP3 interactions | 0        | 0        | 2.632811758  | 0                   |            | HSPA8,HSPB1,RP10A                               |
| 14188 | Interaction | int:KDM28    | KDM28 interactions    | 0        | 0        | 2.632811758  | 0                   |            | CSNK2A1,CSNK2A2,HSPA8                           |
| 14189 | Interaction | int:BRD2     | BRD2 interactions     | 0        | 0        | 2.632811758  | 0                   |            | CSNK2A1,CSNK2A2,HIST1H4A                        |
| 14190 | Interaction | int:LIMK2    | LIMK2 interactions    | 0        | 0        | 2.632811758  | 0                   |            | EMO,HSPB1,TUBAA4                                |
| 14191 | Interaction | int:PGF2     | PGF2 interactions     | 0        | 0        | 2.632811758  | 0                   |            | CSNK2A1,CSNK2A2,RP519                           |
| 14192 | Interaction | int:CFAP97   | CFAP97 interactions   | 0        | 0        | 2.632811758  | 0                   |            | CSNK2A1,CSNK2A2,TPM1                            |
| 14193 | Interaction | int:CDK7     | CDK7 interactions     | 0        | 0        | 2.632811758  | 0                   |            | CSNK2A                                          |

|       |             |                 |                          |          |          |             |               |  |                    |                                           |
|-------|-------------|-----------------|--------------------------|----------|----------|-------------|---------------|--|--------------------|-------------------------------------------|
| 14200 | Interaction | hnt:SON         | SON interactions         | 0        | 0        | 2.581149887 |               |  |                    | DOX21,HNRNP10,HSPAB,ILF3                  |
| 14210 | Interaction | hnt:HSPA1A      | HSPA1A interactions      | 0        | 0        | 2.579380692 |               |  |                    | EIF6,EMO,HSPA1A,HSPA2,HSPAB,TUBAA4,YBX1   |
| 14211 | Interaction | hnt:HDAC1       | HDAC1 interactions       | 0        | 0        | 2.565360657 |               |  |                    |                                           |
| 14212 | Interaction | hnt:NOP53       | NOP53 interactions       | 0        | 0        | 2.565014964 |               |  |                    | EIF3,PUM3,RP10                            |
| 14213 | Interaction | hnt:EXOSC7      | EXOSC7 interactions      | 0        | 0        | 2.565014964 |               |  |                    | RP1A,RP12,RP13                            |
| 14214 | Interaction | hnt:EIF18       | EIF18 interactions       | 0        | 0        | 2.565014964 |               |  |                    | MYL12A,RP13,RP511                         |
| 14215 | Interaction | hnt:TOPORS      | TOPORS interactions      | 2.560956 | 0        | 0           | DXHX15,HNRPM  |  |                    |                                           |
| 14216 | Interaction | hnt:CAP2A2      | CAP2A2 interactions      | 0        | 0        | 2.560273153 |               |  |                    | DBN1,MYH10,MYH13,HSPA8,MYO1C,TM003,TPM1   |
| 14217 | Interaction | hnt:RUP2        | RUP2 interactions        | 0        | 0        | 2.547935888 |               |  |                    | PURB,TPM1                                 |
| 14218 | Interaction | hnt:PPP1B18     | PPP1B18 interactions     | 0        | 0        | 2.547935888 |               |  |                    | CSNK2A1,CNK2A2                            |
| 14219 | Interaction | hnt:ADPNR12     | ADPNR12 interactions     | 0        | 0        | 2.547935888 |               |  |                    | HSPB1,IMPDH2                              |
| 14220 | Interaction | hnt:DNAH12      | DNAH12 interactions      | 0        | 0        | 2.547935888 |               |  |                    | HSPA2,HSP48                               |
| 14221 | Interaction | hnt:DYSF        | DYSF interactions        | 0        | 0        | 2.547935888 |               |  |                    | ANKK1,HNRNP0                              |
| 14222 | Interaction | hnt:SLMO4       | SLMO4 interactions       | 0        | 0        | 2.541290891 |               |  |                    | HNRNP0,HNRNP11,HSPA8,IMPDH2               |
| 14223 | Interaction | hnt:TBICD13     | TBICD13 interactions     | 0        | 2.538448 | 0           |               |  | WDR12              |                                           |
| 14224 | Interaction | hnt:LINC00305   | LINC00305 interactions   | 2.538356 | 0        | 0           | RBBP6         |  |                    |                                           |
| 14225 | Interaction | hnt:DOX46       | DOX46 interactions       | 0        | 0        | 2.532572474 |               |  |                    | RP1A,RP12,RP13                            |
| 14226 | Interaction | hnt:CREM        | CREM interactions        | 0        | 0        | 2.532572474 |               |  |                    | CSNK2A1,CNK2A2,IRBP1                      |
| 14227 | Interaction | hnt:RASSF10     | RASSF10 interactions     | 0        | 0        | 2.532572474 |               |  |                    | ANKK1,CNK2A1,S100A14                      |
| 14228 | Interaction | hnt:NEURL4      | NEURL4 interactions      | 0        | 0        | 2.532572474 |               |  |                    | RP1A,RP12,RP13                            |
| 14229 | Interaction | hnt:MLT1        | MLT1 interactions        | 0        | 0        | 2.532572474 |               |  |                    | CSNK2A1,HSTH3A,RP12                       |
| 14230 | Interaction | hnt:PAP1        | PAP1 interactions        | 0        | 0        | 2.532572474 |               |  |                    | HNRNP0,RP515,STAT1                        |
| 14231 | Interaction | hnt:ELMSAN1     | ELMSAN1 interactions     | 0        | 0        | 2.532572474 |               |  |                    | RP1A,RP12,RP13                            |
| 14232 | Interaction | hnt:NDFU89      | NDFU89 interactions      | 2.529841 | 0        | 0           | HSPA11,RRBP6  |  |                    |                                           |
| 14233 | Interaction | hnt:SART3       | SART3 interactions       | 0        | 2.506148 | 0           |               |  | HNRNPK,RRP15       |                                           |
| 14234 | Interaction | hnt:HDAC11      | HDAC11 interactions      | 0        | 0        | 2.504927713 |               |  |                    | EBNA1BP2,H1X,KGF2BP3,NOP2,RRB2B           |
| 14235 | Interaction | hnt:SEC16A      | SEC16A interactions      | 0        | 0        | 2.504927713 |               |  |                    | DBN1,EMO,HNRPM,HNRPM1,IMPDH1,IMPDH2       |
| 14236 | Interaction | hnt:ARPC5       | ARPC5 interactions       | 0        | 0        | 2.501033045 |               |  |                    | DBN1,MYH11,RP13                           |
| 14237 | Interaction | hnt:HSD17B4     | HSD17B4 interactions     | 0        | 0        | 2.501033045 |               |  |                    | COCT3,HNRNP0,SSBP1                        |
| 14238 | Interaction | hnt:SMARCA1     | SMARCA1 interactions     | 0        | 0        | 2.501033045 |               |  |                    | DOX21,IRBP,SMARCA5                        |
| 14239 | Interaction | hnt:RBM26       | RBM26 interactions       | 0        | 0        | 2.501033045 |               |  |                    | RP1A,RP12,RP13                            |
| 14240 | Interaction | hnt:KAT6A       | KAT6A interactions       | 0        | 0        | 2.501033045 |               |  |                    | HST1H4A,HSTH3A,RP10                       |
| 14241 | Interaction | hnt:PCF11       | PCF11 interactions       | 0        | 0        | 2.501033045 |               |  |                    | RP1A,RP12,RP13                            |
| 14242 | Interaction | hnt:AP5         | AP5 interactions         | 0        | 0        | 2.501033045 |               |  |                    | EBNA1BP2,EIF6,IMPDH2                      |
| 14243 | Interaction | hnt:SNRPA       | SNRPA interactions       | 0        | 2.496408 | 0           |               |  | HNRNPK,SFPQ        |                                           |
| 14244 | Interaction | hnt:JAEC1       | JAEC1 interactions       | 0        | 0        | 2.470846175 |               |  |                    | HSTH3A,RP10                               |
| 14245 | Interaction | hnt:MYF5        | MYF5 interactions        | 0        | 0        | 2.470846175 |               |  |                    | CSNK2A1,CNK2A2                            |
| 14246 | Interaction | hnt:SFBMT1      | SFBMT1 interactions      | 0        | 0        | 2.470846175 |               |  |                    | HST1H4A,IRBP1                             |
| 14247 | Interaction | hnt:CTDP1       | CTDP1 interactions       | 0        | 0        | 2.470846175 |               |  |                    | CSNK2A1,IRBP1                             |
| 14248 | Interaction | hnt:BAZ1B       | BAZ1B interactions       | 0        | 0        | 2.470350842 |               |  |                    | MYO1C,RP10,SMARCA5                        |
| 14249 | Interaction | hnt:ALDH2       | ALDH2 interactions       | 0        | 0        | 2.470350842 |               |  |                    | EIF6,HSPB1,RP13A                          |
| 14250 | Interaction | hnt:WDH01       | WDH01 interactions       | 0        | 0        | 2.470350842 |               |  |                    | RP1A,RP12,RP13                            |
| 14251 | Interaction | hnt:GEMM7       | GEMM7 interactions       | 0        | 0        | 2.470350842 |               |  |                    | RP1P1,SNRPD3,SNRPE                        |
| 14252 | Interaction | hnt:PRMT3       | PRMT3 interactions       | 0        | 0        | 2.470350842 |               |  |                    | HST1H4A,HNRNP0,XRCC5                      |
| 14253 | Interaction | hnt:HST1H2B4    | HST1H2B4 interactions    | 0        | 2.467858 | 0           |               |  | HST1H2B4,NLNP11    |                                           |
| 14254 | Interaction | hnt:PAICS       | PAICS interactions       | 0        | 0        | 2.464715048 |               |  |                    | COCT3,EIF6,HSPB1,HSPB1                    |
| 14255 | Interaction | hnt:PHB         | PHB interactions         | 0        | 0        | 2.463679985 |               |  |                    | C10BP,DBN1,NCL,RP1,RP17,RP54X             |
| 14256 | Interaction | hnt:THOC1       | THOC1 interactions       | 0        | 0        | 2.463227792 |               |  |                    | RP1A,RP12,RP13,TPM1                       |
| 14257 | Interaction | hnt:POLR1A      | POLR1A interactions      | 0        | 0        | 2.463227792 |               |  |                    | CSNK2A1,RP10A,SMARCA5,SSRP1               |
| 14258 | Interaction | hnt:GTJ7H1      | GTJ7H1 interactions      | 2.44297  | 0        | 0           | HNRNP1,RP1A   |  |                    |                                           |
| 14259 | Interaction | hnt:THOCS       | THOCS interactions       | 0        | 0        | 2.440483435 |               |  |                    | RP1A,RP12,RP13                            |
| 14260 | Interaction | hnt:BLWM1       | BLWM1 interactions       | 0        | 0        | 2.440483435 |               |  |                    | DOX24,GRW01,RP11                          |
| 14261 | Interaction | hnt:INCA        | INCA interactions        | 0        | 0        | 2.440483435 |               |  |                    | EBNA1BP2,HSTH3A,HNRNP0                    |
| 14262 | Interaction | hnt:GRW01       | GRW01 interactions       | 0        | 0        | 2.440483435 |               |  |                    | HNRNP0,RP11,RP12,RP29                     |
| 14263 | Interaction | hnt:AKAP5       | AKAP5 interactions       | 0        | 0        | 2.440483435 |               |  |                    | C10BP,HSPA8,NCL                           |
| 14264 | Interaction | hnt:NUTD3       | NUTD3 interactions       | 0        | 0        | 2.440483435 |               |  |                    | DBN1,RP1B,RP1P1                           |
| 14265 | Interaction | hnt:ATRP        | ATRP interactions        | 0        | 0        | 2.440483435 |               |  |                    | RP1A,RP12,RP13                            |
| 14266 | Interaction | hnt:NUPF1       | NUPF1 interactions       | 0        | 2.431267 | 0           |               |  | EEF1A2,HST1H2BL    |                                           |
| 14267 | Interaction | hnt:NDFU52      | NDFU52 interactions      | 2.415937 | 0        | 0           | HSPA11,SQSTM1 |  |                    |                                           |
| 14268 | Interaction | hnt:ORMA4       | ORMA4 interactions       | 0        | 2.413706 | 0           |               |  | EEF1A2             |                                           |
| 14269 | Interaction | hnt:PAH         | PAH interactions         | 0        | 2.413706 | 0           |               |  | RP52A              |                                           |
| 14270 | Interaction | hnt:GPR20       | GPR20 interactions       | 0        | 2.413706 | 0           |               |  | RP31               |                                           |
| 14271 | Interaction | hnt:LOC10000589 | LOC10000589 interactions | 0        | 2.413706 | 0           |               |  | HNRNPK             |                                           |
| 14272 | Interaction | hnt:LOC10000588 | LOC10000588 interactions | 0        | 2.413706 | 0           |               |  | HNRNPK             |                                           |
| 14273 | Interaction | hnt:CP51        | CP51 interactions        | 0        | 0        | 2.411391465 |               |  |                    | HNRNP11,HSPA1A,HSPA8                      |
| 14274 | Interaction | hnt:VEGFA       | VEGFA interactions       | 0        | 0        | 2.411391465 |               |  |                    | HNRNP0,ILF3,YBX1                          |
| 14275 | Interaction | hnt:NOP9        | NOP9 interactions        | 0        | 0        | 2.411391465 |               |  |                    | IMPDH1,IMPDH2,NCL                         |
| 14276 | Interaction | hnt:RBM17       | RBM17 interactions       | 0        | 0        | 2.411391465 |               |  |                    | CSNK2A1,DXH15,MYO1C                       |
| 14277 | Interaction | hnt:GTJF21      | GTJF21 interactions      | 0        | 0        | 2.409978709 |               |  |                    | COCT3,CSNK2A1,MYO1C,NCL                   |
| 14278 | Interaction | hnt:RUNX2       | RUNX2 interactions       | 2.402747 | 0        | 0           | XRCC5,XRCC6   |  |                    |                                           |
| 14279 | Interaction | hnt:SLC12A3     | SLC12A3 interactions     | 0        | 0        | 2.400385845 |               |  |                    | HSPA1A,HSPA8                              |
| 14280 | Interaction | hnt:ZNF317      | ZNF317 interactions      | 0        | 0        | 2.400385845 |               |  |                    | RP13,RP12,RP11                            |
| 14281 | Interaction | hnt:RP1         | RP1 interactions         | 0        | 0        | 2.400385845 |               |  |                    | PUM3,RP15                                 |
| 14282 | Interaction | hnt:CARD10      | CARD10 interactions      | 0        | 0        | 2.400385845 |               |  |                    | DBN1,MYO1C                                |
| 14283 | Interaction | hnt:ZC3H8       | ZC3H8 interactions       | 0        | 0        | 2.400385845 |               |  |                    | CSNK2A1,RP12,RP11                         |
| 14284 | Interaction | hnt:PHYHNP1     | PHYHNP1 interactions     | 0        | 0        | 2.400385845 |               |  |                    | C10BP,HSPB1                               |
| 14285 | Interaction | hnt:CORO1C      | CORO1C interactions      | 0        | 0        | 2.392215346 |               |  |                    | DBN1,MYCBP,MYO1C,RP1A                     |
| 14286 | Interaction | hnt:EXOSC4      | EXOSC4 interactions      | 0        | 0        | 2.392215346 |               |  |                    | HIF1X,HNRNP0,RP13,RP54X                   |
| 14287 | Interaction | hnt:BN1         | BN1 interactions         | 2.389766 | 0        | 0           | XRCC5,XRCC6   |  |                    |                                           |
| 14288 | Interaction | hnt:LLGL2       | LLGL2 interactions       | 2.389766 | 0        | 0           | RBBP6,SQSTM1  |  |                    |                                           |
| 14289 | Interaction | hnt:STRP1       | STRP1 interactions       | 0        | 0        | 2.384347866 |               |  |                    | HSPA1A,HSPA2,HSPA8,HSPB1,HSPB1            |
| 14290 | Interaction | hnt:MRPL22      | MRPL22 interactions      | 0        | 0        | 2.383038356 |               |  |                    | C10BP,RP12,RP51B                          |
| 14291 | Interaction | hnt:DES         | DES interactions         | 0        | 0        | 2.383038356 |               |  |                    | HSPB1,MYH15,RP129                         |
| 14292 | Interaction | hnt:HAT1        | HAT1 interactions        | 0        | 0        | 2.383038356 |               |  |                    | HST1H4A,HSTH3A,HSPA1A                     |
| 14293 | Interaction | hnt:BASP1       | BASP1 interactions       | 0        | 0        | 2.383038356 |               |  |                    | DBN1,HNRNP11,MYO1C                        |
| 14294 | Interaction | hnt:BTX         | BTX interactions         | 0        | 2.370906 | 0           |               |  | EEF1A2,SFPQ        |                                           |
| 14295 | Interaction | hnt:CLX2        | CLX2 interactions        | 2.364406 | 0        | 0           | HNRNP14,RRBP6 |  |                    |                                           |
| 14296 | Interaction | hnt:PHO23       | PHO23 interactions       | 2.362567 | 0        | 0           | SQSTM1        |  |                    |                                           |
| 14297 | Interaction | hnt:QSKL1       | QSKL1 interactions       | 2.362567 | 0        | 0           | XRCC6         |  |                    |                                           |
| 14298 | Interaction | hnt:DNAI1       | DNAI1 interactions       | 2.362567 | 0        | 0           | SQSTM1        |  |                    |                                           |
| 14299 | Interaction | hnt:TMEM98      | TMEM98 interactions      | 2.362567 | 0        | 0           | DOX24         |  |                    |                                           |
| 14300 | Interaction | hnt:MTF1        | MTF1 interactions        | 2.362567 | 0        | 0           | NOP2          |  |                    |                                           |
| 14301 | Interaction | hnt:DNAI2       | DNAI2 interactions       | 2.362567 | 0        | 0           | SQSTM1        |  |                    |                                           |
| 14302 | Interaction | hnt:PSG2        | PSG2 interactions        | 2.362567 | 0        | 0           | PWP1          |  |                    |                                           |
| 14303 | Interaction | hnt:DNICH11     | DNICH11 interactions     | 0        | 0        | 2.358791904 |               |  |                    | HNRNP0,HSPA1A,RP12,XRCC5,YBX1             |
| 14304 | Interaction | hnt:ZYX         | ZYX interactions         | 0        | 0        | 2.357378619 |               |  |                    | DXH15,HST1H4A,HSPB1,TPM1                  |
| 14305 | Interaction | hnt:PLD02       | PLD02 interactions       | 0        | 0        | 2.355390058 |               |  |                    | NCL,RP12A,XRCC5                           |
| 14306 | Interaction | hnt:RFWD3       | RFWD3 interactions       | 0        | 0        | 2.355390058 |               |  |                    | RP1A,RP12,RP13                            |
| 14307 | Interaction | hnt:ZSCAN26     | ZSCAN26 interactions     | 0        | 0        | 2.355390058 |               |  |                    | MYO1C,RP12,RP11,TM003                     |
| 14308 | Interaction | hnt:GMPX5       | GMPX5 interactions       | 0        | 0        | 2.355390058 |               |  |                    | HSPB1,IMPDH1,IMPDH2                       |
| 14309 | Interaction | hnt:TA7F        | TA7F interactions        | 0        | 0        | 2.355390058 |               |  |                    | CSNK2A1,HSTH3A,IRBP6                      |
| 14310 | Interaction | hnt:ZRSR2       | ZRSR2 interactions       | 0        | 0        | 2.355390058 |               |  |                    | C10BP,RP10A,RP12,RP11                     |
| 14311 | Interaction | hnt:CL10BP      | CL10BP interactions      | 0        | 0        | 2.345594457 |               |  |                    | C10BP,EMO,HNRNP0,HSPA8,XRCC5,IRBP1        |
| 14312 | Interaction | hnt:CAPZ1       | CAPZ1 interactions       | 0        | 0        | 2.340294866 |               |  |                    | HSPB1,RP1A,RP12,RP13                      |
| 14313 | Interaction | hnt:APC         | APC interactions         | 0        | 0        | 2.335571319 |               |  |                    | CSNK2A1,HNRNP14,HSPA8,PCF11,S100A4,TUBA8A |
| 14314 | Interaction | hnt:FBRS        | FBRS interactions        | 0        | 0        | 2.335528195 |               |  |                    | CSNK2A1,CNK2A2                            |
| 14315 | Interaction | hnt:JPT2        | JPT2 interactions        | 0        | 0        | 2.335528195 |               |  |                    | HSPB1,XRCC5                               |
| 14316 | Interaction | hnt:WDR46       | WDR46 interactions       | 0        | 0        | 2.335528195 |               |  |                    | CSNK2A2,PUM3                              |
| 14317 | Interaction | hnt:PLEKRG3     | PLEKRG3 interactions     | 0        | 0        | 2.335528195 |               |  |                    | DBN1,MYO1C                                |
| 14318 | Interaction | hnt:BTIRC       | BTIRC interactions       | 2.329022 | 0        | 0           |               |  | HNRNPK,RP51B,WDR12 |                                           |
| 14319 | Interaction | hnt:RAB6A       | RAB6A interactions       | 0        | 0        | 2.32841482  |               |  |                    | RP1A,RP12,RP13                            |
| 14320 | Interaction | hnt:ST13        | ST13 interactions        | 0        | 0        | 2.32841482  |               |  |                    | HSPA1A,HSPA8,XRCC6                        |
| 14321 | Interaction | hnt:DNK36       | DNK36 interactions       | 0        | 0        | 2.32841482  |               |  |                    | RP10A,RP12,RP13                           |
| 14322 | Interaction | hnt:RANBP3      | RANBP3 interactions      | 0        | 0        | 2.32841482  |               |  |                    | RP12A,RP127A,XRCC5                        |
| 14323 | Interaction | hnt:FOXM1       | FOXM1 interactions       | 2.327782 | 0        | 0           | BMS1,DNAJC9   |  |                    |                                           |
| 14324 | Interaction | hnt:DSP         | DSP interactions         | 0        | 0        | 2.32342755  |               |  |                    | COCT3,RP1A,RP12,RP13                      |
| 14325 | Interaction | hnt:PCDH14      | PCDH14 interactions      | 0        | 0        | 2.316993    |               |  | HNRNPK             |                                           |
| 14326 | Interaction | hnt:PLK2        | PLK2 interactions        | 0        | 2.316993 | 0           |               |  | RP519              |                                           |
| 14327 | Interaction | hnt:WDR53       | WDR53 interactions       | 0        | 2.316993 | 0           |               |  | EEF1A2             |                                           |
| 14328 | Interaction | hnt:RBBP6       | RBBP6 interactions       | 2.31593  | 0        | 0           | DOX24,RBBP6   |  |                    |                                           |
| 14329 | Interaction | hnt:SSB         | SSB interactions         | 0        | 0        | 2.3067719   |               |  |                    | CSNK2A1,EMO,NCL,RP13,RP1                  |
| 14330 | Interaction | hnt:GEMM4       | GEMM4 interactions       | 2.304248 | 0        | 0           | RPAL,SQSTM1   |  |                    |                                           |
| 14331 | Interaction | hnt:ACTL2       | ACTL2 interactions       | 0        | 0        | 2.302082991 |               |  |                    | RP1A,RP12,RP13                            |
| 14332 | Interaction | hnt:TA1D        | TA1D interactions        | 0        | 0        | 2.302082991 |               |  |                    | CSNK2A1,CNK2A2,RRP15                      |
| 14333 | Interaction | hnt:MRPL3       | MRPL3 interactions       | 0        | 0        | 2.302082991 |               |  |                    | C10BP,RP515,RP51B                         |
| 14334 | Interaction | hnt:PAK5        | PAK5 interactions        | 0        | 0        | 2.302082991 |               |  |                    | C10BP,EMO,IRBP2                           |
| 14335 | Interaction | hnt:S100A10     | S100A10 interactions     | 0        | 0        | 2.302082991 |               |  |                    | RP10A,RP10L,RP12                          |
| 14336 | Interaction | hnt:ERH         | ERH interactions         | 0        | 0        | 2.302082991 |               |  |                    | CSNK2A1,CNK2A2,HSPA8                      |
| 14337 | Interaction | hnt:CHD3        | CHD3 interactions        | 0        | 0        | 2.296728766 |               |  |                    | CSNK2A1,HST1H2BL,RP10,RP12,SMARCA5        |
| 14338 | Interaction | hnt:UCHL        |                          |          |          |             |               |  |                    |                                           |

[illegible]

|       |             |              |                       |          |          |             |                                |
|-------|-------------|--------------|-----------------------|----------|----------|-------------|--------------------------------|
| 14499 | Interaction | int:USP24    | USP24 interactions    | 0        | 0        | 2.028325583 | CSNK2A1,HNRNP                  |
| 14500 | Interaction | int:LAIR4    | LAIR4 interactions    | 0        | 0        | 2.028325583 | MYO1C,RPL10                    |
| 14501 | Interaction | int:FAM136A  | FAM136A interactions  | 0        | 0        | 2.028325583 | C10BP,DHX30                    |
| 14502 | Interaction | int:P104K2B  | P104K2B interactions  | 0        | 0        | 2.028325583 | CSNK2A2,MYL5                   |
| 14503 | Interaction | int:SP1B     | SP1B interactions     | 0        | 0        | 2.028325583 | CSNK2A1,CSNK2A2                |
| 14504 | Interaction | int:R10X2    | R10X2 interactions    | 0        | 0        | 2.028325583 | RPL10,RPL8                     |
| 14505 | Interaction | int:TSKG6    | TSKG6 interactions    | 0        | 0        | 2.028325583 | HSPA1A,HSPA8                   |
| 14506 | Interaction | int:TMEM126A | TMEM126A interactions | 0        | 0        | 2.028325583 | CSNK2A1,SSRP1                  |
| 14507 | Interaction | int:MSP      | MSP interactions      | 0        | 0        | 2.028325583 | DBN1,MYO1C                     |
| 14508 | Interaction | int:MNAT1    | MNAT1 interactions    | 0        | 0        | 2.027694685 | RPA1,RP2A,RP3A                 |
| 14509 | Interaction | int:SEH1L    | SEH1L interactions    | 0        | 0        | 2.027694685 | RPA1,RP2A,RP3A                 |
| 14510 | Interaction | int:NCMP1    | NCMP1 interactions    | 0        | 0        | 2.027694685 | HSBP1,RP13,SSRP1               |
| 14511 | Interaction | int:THOC7    | THOC7 interactions    | 0        | 0        | 2.027694685 | RPA1,RP2A,RP3A                 |
| 14512 | Interaction | int:SOD1     | SOD1 interactions     | 0        | 2.018903 | 0           | E1F5A,TXN                      |
| 14513 | Interaction | int:ABT81    | ABT81 interactions    | 0        | 2.016945 | 0           | EEF1A2                         |
| 14514 | Interaction | int:BLVR8    | BLVR8 interactions    | 0        | 2.016945 | 0           | RPL31                          |
| 14515 | Interaction | int:TGB1     | TGB1 interactions     | 0        | 0        | 2.011943692 |                                |
| 14516 | Interaction | int:CBX5     | CBX5 interactions     | 0        | 0        | 2.010476693 | HISTH3,NCL,PARP2,RPL5,XRCC6    |
| 14517 | Interaction | int:SUPT6H   | SUPT6H interactions   | 0        | 0        | 2.007721293 | CSNK2A1,EMD,NCL                |
| 14518 | Interaction | int:SEC22B   | SEC22B interactions   | 0        | 0        | 2.007721293 | RPA1,RP2A,RP3A                 |
| 14519 | Interaction | int:HST1H1B  | HST1H1B interactions  | 0        | 0        | 2.007721293 | H1FX,PARP2,RPL10               |
| 14520 | Interaction | int:ATP9C1E1 | ATP9C1E1 interactions | 0        | 0        | 2.007721293 | SSRP1,XRCC5,YBX1               |
| 14521 | Interaction | int:LUC7L    | LUC7L interactions    | 0        | 0        | 1.998857086 | C10BP,CSNK2A1,CSNK2A2,SNRPD3   |
| 14522 | Interaction | int:CAPN11   | CAPN11 interactions   | 1.995795 | 0        | 0           | XRCC6                          |
| 14523 | Interaction | int:RBPA     | RBPA interactions     | 1.995795 | 0        | 0           | RBBP6                          |
| 14524 | Interaction | int:C2orf69  | C2orf69 interactions  | 1.995795 | 0        | 0           | KIF11                          |
| 14525 | Interaction | int:ANKK6    | ANKK6 interactions    | 1.995795 | 0        | 0           | KIF11                          |
| 14526 | Interaction | int:CCRL2    | CCRL2 interactions    | 1.995795 | 0        | 0           | IGHA1                          |
| 14527 | Interaction | int:SLC11A1  | SLC11A1 interactions  | 1.995795 | 0        | 0           | SQSTM1                         |
| 14528 | Interaction | int:ATP2J    | ATP2J interactions    | 1.995795 | 0        | 0           | XRCC6                          |
| 14529 | Interaction | int:MDG5     | MDG5 interactions     | 1.995795 | 0        | 0           | XRCC5                          |
| 14530 | Interaction | int:IDO1     | IDO1 interactions     | 1.995795 | 0        | 0           | DDX24                          |
| 14531 | Interaction | int:PRAP1    | PRAP1 interactions    | 1.995795 | 0        | 0           | IGHA1                          |
| 14532 | Interaction | int:CN2I     | CN2I interactions     | 1.995795 | 0        | 0           | HSPA1L                         |
| 14533 | Interaction | int:DCBL1    | DCBL1 interactions    | 0        | 0        | 1.994630773 | BANF1,GRW1,PHIP,RPA1,RP2A,RP3A |
| 14534 | Interaction | int:ZFR      | ZFR interactions      | 0        | 0        | 1.98812165  | RPA1,RP2A,RP3A                 |
| 14535 | Interaction | int:R1CTOR   | R1CTOR interactions   | 0        | 0        | 1.98812165  | RPL13,RPL23,RPL23A             |
| 14536 | Interaction | int:HSPA4L   | HSPA4L interactions   | 0        | 0        | 1.98812165  | DNAJC9,HSPA8,HSP1E             |
| 14537 | Interaction | int:S100A11  | S100A11 interactions  | 0        | 0        | 1.986940602 | ANKA1,NCL                      |
| 14538 | Interaction | int:PRF42A   | PRF42A interactions   | 0        | 0        | 1.986940602 | CSNK2A1,CSNK2A2                |
| 14539 | Interaction | int:PATZ1    | PATZ1 interactions    | 0        | 0        | 1.986940602 | NCOR1,RBP1                     |
| 14540 | Interaction | int:ASB16    | ASB16 interactions    | 0        | 0        | 1.986940602 | HST1H4A,HSPA1A                 |
| 14541 | Interaction | int:PAEP     | PAEP interactions     | 0        | 0        | 1.986940602 | BANF1,XRCC6                    |
| 14542 | Interaction | int:RBM33    | RBM33 interactions    | 0        | 0        | 1.986940602 | CSNK2A1,MYO1C                  |
| 14543 | Interaction | int:OBSCN    | OBSCN interactions    | 0        | 0        | 1.986940602 | HNRNP0,RPA1                    |
| 14544 | Interaction | int:HSPB8    | HSPB8 interactions    | 0        | 0        | 1.986940602 | CSNK2A1,HSPB1                  |
| 14545 | Interaction | int:ASB14    | ASB14 interactions    | 0        | 0        | 1.986940602 | EMD,RPL23                      |
| 14546 | Interaction | int:DNAJC3   | DNAJC3 interactions   | 0        | 0        | 1.986940602 | HSPA1A,HSPA8                   |
| 14547 | Interaction | int:IL12RB1  | IL12RB1 interactions  | 0        | 0        | 1.986940602 | SNRPD,TUBA4A                   |
| 14548 | Interaction | int:ESF1     | ESF1 interactions     | 0        | 0        | 1.986940602 | AATF,PUM3                      |
| 14549 | Interaction | int:AUTS2    | AUTS2 interactions    | 0        | 0        | 1.986940602 | CSNK2A1,CSNK2A2                |
| 14550 | Interaction | int:AR451    | AR451 interactions    | 0        | 0        | 1.986940602 | CD73,RPL10                     |
| 14551 | Interaction | int:ASB17    | ASB17 interactions    | 0        | 0        | 1.986940602 | HSPB1,RPL23                    |
| 14552 | Interaction | int:RAD1     | RAD1 interactions     | 0        | 0        | 1.986940602 | RPA1,RP2A                      |
| 14553 | Interaction | int:RAD51    | RAD51 interactions    | 0        | 0        | 1.985907216 | CD73,MYH11,RPL1,RP3A           |
| 14554 | Interaction | int:ATM      | ATM interactions      | 0        | 0        | 1.980860813 | AATF,HSPA8,RPA1,RP2A,XRCC5     |
| 14555 | Interaction | int:MAPK6    | MAPK6 interactions    | 0        | 0        | 1.980860813 | DBN1,EMD,HNRNP0,HSPB1,RPL10    |
| 14556 | Interaction | int:KLHC4    | KLHC4 interactions    | 0        | 1.975749 | 0           | RP519                          |
| 14557 | Interaction | int:PLA2G12A | PLA2G12A interactions | 0        | 1.975749 | 0           | RP56                           |
| 14558 | Interaction | int:RPS19BP1 | RPS19BP1 interactions | 0        | 1.975749 | 0           | RP519                          |
| 14559 | Interaction | int:CALLU    | CALLU interactions    | 0        | 0        | 1.97309187  |                                |
| 14560 | Interaction | int:GART     | GART interactions     | 0        | 0        | 1.968881365 | CSNK2A1,DBN1,RP2A,RP2L1        |
| 14561 | Interaction | int:CLU      | CLU interactions      | 1.967818 | 0        | 0           | DBN1,RPL24,XRCC6               |
| 14562 | Interaction | int:TSIG101  | TSIG101 interactions  | 0        | 1.966865 | 0           | SPFQ,WDR12                     |
| 14563 | Interaction | int:AKT1     | AKT1 interactions     | 0        | 0        | 1.960333259 |                                |
| 14564 | Interaction | int:RING1    | RING1 interactions    | 0        | 0        | 1.949994651 | CSNK2A1,CSNK2A2,HISTH3         |
| 14565 | Interaction | int:CBP2     | CBP2 interactions     | 0        | 0        | 1.949994651 | DDX2A,GFIPB3,RPL10             |
| 14566 | Interaction | int:OXC1T1   | OXC1T1 interactions   | 0        | 0        | 1.949994651 | C10BP,HSPB1,NCL                |
| 14567 | Interaction | int:TUBB2A   | TUBB2A interactions   | 0        | 0        | 1.947854223 | EMD,RP2A,RPL1,TUBA4A           |
| 14568 | Interaction | int:MER1     | MER1 interactions     | 0        | 0        | 1.94762742  | CSNK2A1,TUBB1                  |
| 14569 | Interaction | int:SDA01    | SDA01 interactions    | 0        | 0        | 1.94762742  | CSNK2A2,RBM28                  |
| 14570 | Interaction | int:CEP55    | CEP55 interactions    | 0        | 0        | 1.94762742  | RPA1,RP2A                      |
| 14571 | Interaction | int:NACA2    | NACA2 interactions    | 0        | 0        | 1.94762742  | RPL23,RP53                     |
| 14572 | Interaction | int:MYL6B    | MYL6B interactions    | 0        | 0        | 1.94762742  | MYL6,MYL6B                     |
| 14573 | Interaction | int:TPRN     | TPRN interactions     | 0        | 0        | 1.94762742  | DBN1,MYO1C                     |
| 14574 | Interaction | int:ZNF792   | ZNF792 interactions   | 0        | 1.938157 | 0           | HNRNP                          |
| 14575 | Interaction | int:E1F4EBP2 | E1F4EBP2 interactions | 0        | 1.938157 | 0           | TXN                            |
| 14576 | Interaction | int:CHMP7    | CHMP7 interactions    | 0        | 1.938157 | 0           | WDR12                          |
| 14577 | Interaction | int:RASO1    | RASO1 interactions    | 0        | 1.938157 | 0           | HNRNP                          |
| 14578 | Interaction | int:CHD9     | CHD9 interactions     | 1.938105 | 0        | 0           | SQSTM1                         |
| 14579 | Interaction | int:FLVCH1   | FLVCH1 interactions   | 1.938105 | 0        | 0           | KIF11                          |
| 14580 | Interaction | int:DP2B     | DP2B interactions     | 1.938105 | 0        | 0           | SQSTM1                         |
| 14581 | Interaction | int:FAM120C  | FAM120C interactions  | 1.938105 | 0        | 0           | HNRNP                          |
| 14582 | Interaction | int:LAPTM4A  | LAPTM4A interactions  | 1.938105 | 0        | 0           | HNRNP                          |
| 14583 | Interaction | int:LRRC2B   | LRRC2B interactions   | 1.938105 | 0        | 0           | HSPA1L                         |
| 14584 | Interaction | int:PDE4A    | PDE4A interactions    | 1.938105 | 0        | 0           | SQSTM1                         |
| 14585 | Interaction | int:CEACAM5  | CEACAM5 interactions  | 1.938105 | 0        | 0           | HNRNP                          |
| 14586 | Interaction | int:PRF1     | PRF1 interactions     | 1.938105 | 0        | 0           | DDX24                          |
| 14587 | Interaction | int:MRRP40   | MRRP40 interactions   | 0        | 0        | 1.931444389 | HSPB1,ILF3,RPL13               |
| 14588 | Interaction | int:CAKX     | CAKX interactions     | 0        | 0        | 1.932469086 | CD73,CSNK2A1,RP2A,RP2A,RP3A    |
| 14589 | Interaction | int:BYSL     | BYSL interactions     | 0        | 0        | 1.931232681 | EMD,RP126L1,RP5A,WDR12         |
| 14590 | Interaction | int:ARPC1B   | ARPC1B interactions   | 0        | 0        | 1.931232589 | DBN1,MYO1C,RP2A                |
| 14591 | Interaction | int:MTA2     | MTA2 interactions     | 0        | 0        | 1.930948729 | BANF1,HISTH3,HNRNP0,HNRNP      |
| 14592 | Interaction | int:CNTRC8   | CNTRC8 interactions   | 0        | 0        | 1.930948729 | BANF1,CD73,RPL10,SSRP1         |
| 14593 | Interaction | int:CGN      | CGN interactions      | 0        | 0        | 1.93019717  | DBN1,MYH11                     |
| 14594 | Interaction | int:PPM1D    | PPM1D interactions    | 0        | 0        | 1.93019717  | NCL,RPL5                       |
| 14595 | Interaction | int:SPIN2B   | SPIN2B interactions   | 0        | 0        | 1.93019717  | PARP2,SSRP1                    |
| 14596 | Interaction | int:CNBPX    | CNBPX interactions    | 0        | 0        | 1.93019717  | RPA1,RP2A                      |
| 14597 | Interaction | int:ADAR1    | ADAR1 interactions    | 0        | 0        | 1.93019717  | C1orf55,EBNA1BP2               |
| 14598 | Interaction | int:ECE1     | ECE1 interactions     | 0        | 0        | 1.93019717  | DBN1,RPL19                     |
| 14599 | Interaction | int:FIIB     | FIIB interactions     | 0        | 0        | 1.93019717  | CSNK2A1,E1F6                   |
| 14600 | Interaction | int:KDM3B    | KDM3B interactions    | 0        | 0        | 1.93019717  | HISTH3,SRP68                   |
| 14601 | Interaction | int:CLUFA2   | CLUFA2 interactions   | 0        | 1.903591 | 0           | RP56                           |
| 14602 | Interaction | int:PGAM2    | PGAM2 interactions    | 0        | 1.903591 | 0           | TXN                            |
| 14603 | Interaction | int:NAP1L2   | NAP1L2 interactions   | 0        | 1.903591 | 0           | NAP1L1                         |
| 14604 | Interaction | int:PRUNE2   | PRUNE2 interactions   | 0        | 1.903591 | 0           | RP524                          |
| 14605 | Interaction | int:G2MK     | G2MK interactions     | 0        | 1.903591 | 0           | HNRNP                          |
| 14606 | Interaction | int:IST      | IST interactions      | 0        | 1.903591 | 0           | TXN                            |
| 14607 | Interaction | int:C19orf43 | C19orf43 interactions | 0        | 1.903591 | 0           | RPL36                          |
| 14608 | Interaction | int:SF3B6    | SF3B6 interactions    | 0        | 0        | 1.895316359 | DHX15,ILF3,RP511               |
| 14609 | Interaction | int:CTPS1    | CTPS1 interactions    | 0        | 0        | 1.895316359 | IMPDH1,IMPDH2,RBM28            |
| 14610 | Interaction | int:MEK1     | MEK1 interactions     | 0        | 0        | 1.895316359 | HISTH3,HSPA8,RP2A              |
| 14611 | Interaction | int:EXOSC8   | EXOSC8 interactions   | 0        | 0        | 1.895316359 | RPA1,RP2A,RP3A                 |
| 14612 | Interaction | int:EP300    | EP300 interactions    | 0        | 0        | 1.892526198 |                                |
| 14613 | Interaction | int:ADAR2    | ADAR2 interactions    | 1.887253 | 0        | 0           | KIF11                          |
| 14614 | Interaction | int:TSR2     | TSR2 interactions     | 1.887253 | 0        | 0           | DDX24                          |
| 14615 | Interaction | int:ASAP3    | ASAP3 interactions    | 1.887253 | 0        | 0           | XRCC5                          |
| 14616 | Interaction | int:H2BFS    | H2BFS interactions    | 1.887253 | 0        | 0           | KIF11                          |
| 14617 | Interaction | int:NBEAL1   | NBEAL1 interactions   | 1.887253 | 0        | 0           | HNRNP                          |
| 14618 | Interaction | int:NOL7     | NOL7 interactions     | 1.887253 | 0        | 0           | KIF11                          |
| 14619 | Interaction | int:INPP5A   | INPP5A interactions   | 1.887253 | 0        | 0           | IGHA1                          |
| 14620 | Interaction | int:EMILIN3  | EMILIN3 interactions  | 1.887253 | 0        | 0           | SQSTM1                         |
| 14621 | Interaction | int:PTER     | PTER interactions     | 1.887253 | 0        | 0           | XRCC5                          |
| 14622 | Interaction | int:PEX3     | PEX3 interactions     | 1.887253 | 0        | 0           | DHX15                          |
| 14623 | Interaction | int:CCDC148  | CCDC148 interactions  | 1.887253 | 0        | 0           | IGHA1                          |
| 14624 | Interaction | int:FCF1     | FCF1 interactions     | 1.887253 | 0        | 0           | HNRNP                          |
| 14625 | Interaction | int:ACOT8    | ACOT8 interactions    | 1.887253 | 0        | 0           | IGHA1                          |
| 14626 | Interaction | int:RELN     | RELN interactions     | 1.887253 | 0        | 0           | SQSTM1                         |
| 14627 | Interaction | int:FOCAD    | FOCAD interactions    | 1.887253 | 0        | 0           | HNRNP                          |
| 14628 | Interaction | int:NOST1    | NOST1 interactions    | 1.887253 | 0        | 0           | XRCC5                          |
| 14629 | Interaction | int:PDHA2    | PDHA2 interactions    | 1.887253 | 0        | 0           | HNRNP                          |
| 14630 | Interaction | int:MAP3K6   | MAP3K6 interactions   | 1.887253 | 0        | 0           | XRCC5                          |
| 14631 | Interaction | int:FOXPF3   | FOXPF3 interactions   | 0        | 0        | 1.885865535 |                                |
| 14632 | Interaction | int:MECP2    | MECP2 interactions    | 0        | 0        | 1.877718875 | AATF,SRP90                     |
| 14633 | Interaction | int:ARPC4    | ARPC4 interactions    | 0        | 0        | 1.877718875 | EMD,RP3A                       |
| 14634 | Interaction | int:ETSL     | ETSL interactions     | 0        | 0        | 1.877718875 | AATF,RP90                      |
| 14635 | Interaction | int:PLG      | PLG interactions      | 0        | 0        | 1.877718875 | SMARCA5,XRCC5                  |
| 14636 | Interaction | int:LMAN1    | LMAN1 interactions    | 0        | 0        | 1.877718875 |                                |
| 14637 | Interaction | int:ACTC1    | ACTC1 interactions    | 0        | 0        | 1.877718875 |                                |
| 14638 | Interaction | int:PRPF4    | PRPF4 interactions    | 1.874486 | 0        | 0           | DHX15,HNRNP                    |
| 14639 | Interaction | int:LSMS     | LSMS interactions     | 0        | 0        | 1.874485688 | HNRNP,SMRPE                    |
| 14640 | Interaction | int:C11orf57 | C11orf57 interactions | 0        | 0        | 1.874485688 | CSNK2A1,CSNK2A2                |
| 14641 | Interaction | int:CTNBP1   | CTNBP1 interactions   | 0        | 0        | 1.874485688 | EMD,RP3A                       |
| 14642 | Interaction | int:IRX1     | IRX1 interactions     | 0        | 0        | 1.874485688 | AATF,RP90                      |
| 14643 | Interaction | int:CHAC1    | CHAC1 interactions    | 0        | 0        | 1.874485688 | SMARCA5,XRCC5                  |

|       |             |                 |                          |          |             |             |               |           |                                    |
|-------|-------------|-----------------|--------------------------|----------|-------------|-------------|---------------|-----------|------------------------------------|
| 14643 | Interaction | int:DAPP1       | DAPP1 interactions       | 0        | 0           | 1.874485688 |               |           | HSPA1L,RP123                       |
| 14645 | Interaction | int:ATPEV0A2    | ATPEV0A2 interactions    | 0        | 0           | 1.874485688 |               |           | RP10L,RP15                         |
| 14646 | Interaction | int:NOL10       | NOL10 interactions       | 0        | 0           | 1.874485688 |               |           | AATF,GRWD1                         |
| 14647 | Interaction | int:CBLL1       | CBLL1 interactions       | 0        | 1.871603    | 0           |               |           |                                    |
| 14648 | Interaction | int:DPV5        | DPV5 interactions        | 0        | 1.871603    | 0           |               | SPFQ      |                                    |
| 14649 | Interaction | int:NDON        | NDON interactions        | 1.867747 | 0           | 0           | DDX24,HNRNPU  |           |                                    |
| 14650 | Interaction | int:NR3C1       | NR3C1 interactions       | 0        | 1.867623    | 0           |               | SPFQ,TNIN |                                    |
| 14651 | Interaction | int:PKR32       | PKR32 interactions       | 1.861067 | 0           | 0           | HSPA1L,SQSTM1 |           |                                    |
| 14652 | Interaction | int:RPS6A5      | RPS6A5 interactions      | 0        | 1.860419849 | 0           |               |           | HST1H2B8,HSTH3,RP1A                |
| 14653 | Interaction | int:LSMTL2      | LSMTL2 interactions      | 0        | 0           | 1.860419849 |               |           | HST1H2B8,HSTH3,SMARCA5             |
| 14654 | Interaction | int:TUBB2B      | TUBB2B interactions      | 0        | 0           | 1.860419849 |               |           | RPS4X,TUBA4A,TUBB1                 |
| 14655 | Interaction | int:LGALS3BP    | LGALS3BP interactions    | 0        | 0           | 1.851836083 |               |           | HSPA1A,HSPAB,RP123,RPS4X           |
| 14656 | Interaction | int:NSUN2       | NSUN2 interactions       | 0        | 0           | 1.843410411 |               |           | NCL,RP1A,RP10                      |
| 14657 | Interaction | int:RPD18       | RPD18 interactions       | 0        | 0           | 1.843410411 |               |           | RP1A,RP2,RP43                      |
| 14658 | Interaction | int:HSPA6       | HSPA6 interactions       | 0        | 0           | 1.843410411 |               |           | HNRNPPO,HSJA1A,HSPA8               |
| 14659 | Interaction | int:TIMM23B     | TIMM23B interactions     | 0        | 1.841836    | 0           |               | SPFQ      |                                    |
| 14660 | Interaction | int:NDUFA2F     | NDUFA2F interactions     | 0        | 1.841836    | 0           |               | RP524     |                                    |
| 14661 | Interaction | int:IMPF1       | IMPF1 interactions       | 0        | 1.841836    | 0           |               | WOR12     |                                    |
| 14662 | Interaction | int:CC5         | CC5 interactions         | 0        | 1.841836    | 0           |               | TNIN      |                                    |
| 14663 | Interaction | int:JPT1        | JPT1 interactions        | 0        | 1.841836    | 0           |               | SPFQ      |                                    |
| 14664 | Interaction | int:UBL5        | UBL5 interactions        | 0        | 1.841836    | 0           |               | TNIN      |                                    |
| 14665 | Interaction | int:GAS         | GAS interactions         | 1.841797 | 0           | 0           | SQSTM1        |           |                                    |
| 14666 | Interaction | int:GFM2        | GFM2 interactions        | 1.841797 | 0           | 0           | SQSTM1        |           |                                    |
| 14667 | Interaction | int:PRR12       | PRR12 interactions       | 1.841797 | 0           | 0           | CAIML5        |           |                                    |
| 14668 | Interaction | int:KIAA0922    | KIAA0922 interactions    | 1.841797 | 0           | 0           | KIF11         |           |                                    |
| 14669 | Interaction | int:CL38r71     | CL38r71 interactions     | 1.841797 | 0           | 0           | HNRNPU        |           |                                    |
| 14670 | Interaction | int:ROCL1       | ROCL1 interactions       | 1.841797 | 0           | 0           | HNRNPU        |           |                                    |
| 14671 | Interaction | int:DNTT        | DNTT interactions        | 1.841797 | 0           | 0           | XRC6          |           |                                    |
| 14672 | Interaction | int:KIAA1143    | KIAA1143 interactions    | 1.841797 | 0           | 0           | DHX15         |           |                                    |
| 14673 | Interaction | int:NR0N2       | NR0N2 interactions       | 1.841797 | 0           | 0           | DDX24         |           |                                    |
| 14674 | Interaction | int:SPRED2      | SPRED2 interactions      | 1.841797 | 0           | 0           | SQSTM1        |           |                                    |
| 14675 | Interaction | int:CDCCL17     | CDCCL17 interactions     | 1.841797 | 0           | 0           | HSJA1L        |           |                                    |
| 14676 | Interaction | int:AVEN        | AVEN interactions        | 1.841797 | 0           | 0           | HNRNPU        |           |                                    |
| 14677 | Interaction | int:ARHGEF28    | ARHGEF28 interactions    | 1.841797 | 0           | 0           | SQSTM1        |           |                                    |
| 14678 | Interaction | int:JUN         | JUN interactions         | 0        | 0           | 1.84150438  |               |           | CNN3L,DDX21,HNRNP,HSJA1,NCOR1,TPM1 |
| 14679 | Interaction | int:HST1H2B8    | HST1H2B8 interactions    | 0        | 0           | 1.840349381 |               |           | HST1H2B8,PABP2                     |
| 14680 | Interaction | int:CHCHD4      | CHCHD4 interactions      | 0        | 0           | 1.840349381 |               |           | ILF3,RP10L                         |
| 14681 | Interaction | int:APTX        | APTX interactions        | 0        | 0           | 1.840349381 |               |           | BANF1,DDX21                        |
| 14682 | Interaction | int:ADAP1       | ADAP1 interactions       | 0        | 0           | 1.840349381 |               |           | NCL,PURA                           |
| 14683 | Interaction | int:KDMAA       | KDMAA interactions       | 0        | 0           | 1.840349381 |               |           | HST1H4A,NCOR1                      |
| 14684 | Interaction | int:MYH1        | MYH1 interactions        | 0        | 0           | 1.840349381 |               |           | HNRNPPO,TPM1                       |
| 14685 | Interaction | int:SNORD116-24 | SNORD116-24 interactions | 0        | 0           | 1.833483554 |               |           | ILF3                               |
| 14686 | Interaction | int:SNORA2C     | SNORA2C interactions     | 0        | 0           | 1.833483554 |               |           | ILF3                               |
| 14687 | Interaction | int:TCF1        | TCF1 interactions        | 0        | 0           | 1.833483554 |               |           | CNN2A1                             |
| 14688 | Interaction | int:SNORDB8C    | SNORDB8C interactions    | 0        | 0           | 1.833483554 |               |           | ILF3                               |
| 14689 | Interaction | int:AGAP7P      | AGAP7P interactions      | 0        | 0           | 1.833483554 |               |           | HSPB1                              |
| 14690 | Interaction | int:SNORSD0B    | SNORSD0B interactions    | 0        | 0           | 1.833483554 |               |           | ILF3                               |
| 14691 | Interaction | int:ANKRD9      | ANKRD9 interactions      | 0        | 0           | 1.833483554 |               |           |                                    |



|       |             |                                           |                                                                        |           |           |             |                                                  |                                    |
|-------|-------------|-------------------------------------------|------------------------------------------------------------------------|-----------|-----------|-------------|--------------------------------------------------|------------------------------------|
| 14932 | Coxpression | M5884                                     | Genes up-regulated in comparison of central memory CD4 (GeneID=155336) | 0         | 0         | 10          |                                                  |                                    |
| 14935 | Coxpression | M5336                                     | Genes up-regulated in comparison of peripheral blood mononuclear       | 0         | 0         | 10          |                                                  |                                    |
| 14936 | Coxpression | 19171046-table51a                         | Human Liver_Dongou_104genes                                            | 0         | 0         | 10          |                                                  |                                    |
| 14937 | Coxpression | 15790779-Table2                           | Human BoneMarrow_104genes                                              | 0         | 0         | 10          |                                                  |                                    |
| 14938 | Coxpression | 149388 Coxpression                        | Genes up-regulated in comparison of naive CD8 T cells versus effector  | 0         | 0         | 10          |                                                  |                                    |
| 14939 | Coxpression | 19074878-Supptable2                       | Rat Leukemia_Hillbiller0_145genes                                      | 0         | 0         | 10          |                                                  |                                    |
| 14940 | Coxpression | 15070671-Table52                          | Human StemCell_Bhattacharyya0_105genes                                 | 0         | 0         | 10          |                                                  |                                    |
| 14941 | Coxpression | 15171713-Table1                           | Human Breast_Cistatelli04_344genes                                     | 0         | 0         | 10          |                                                  |                                    |
| 14942 | Coxpression | M5129                                     | Genes changed in Rat1a cells (fibroblasts) by overexpression of HMM    | 0         | 0         | 10          |                                                  |                                    |
| 14943 | Coxpression | M535                                      | Genes down-regulated in CD34+ (GeneID=947) cells isolated from bone    | 0         | 0         | 10          |                                                  |                                    |
| 14944 | Coxpression | M6332                                     | Genes up-regulated in spleen from mice injected with LPS: DUSP1/G      | 0         | 0         | 10          |                                                  |                                    |
| 14945 | Coxpression | M1944                                     | Genes down-regulated by overexpression of MAOI (GeneID=4084) in        | 0         | 0         | 10          |                                                  |                                    |
| 14946 | Coxpression | M50791                                    | Genes up-regulated in NHEK cells (normal epidermal keratinocytes) by   | 0         | 0         | 10          |                                                  |                                    |
| 14947 | Coxpression | GSE135447_WT_vs_ZPK_KO_BCELL_ANTH_KIM_STM | Genes up-regulated in B lymphocytes stimulated by anti-anti IgM for 2h | 0         | 0         | 10          |                                                  |                                    |
| 14948 | Coxpression | GSE21927_SPLEEN_C57BL6_vs_E14_TUMOR_BALBc | Genes down-regulated in CD11b- from spleen of healthy C57BL6 ver       | 0         | 0         | 10          |                                                  |                                    |
| 14949 | Coxpression | GSE34515_CD16_NEG_vs_POS_MONOCYTE_DN      | Genes down-regulated in monocytes: CD16- versus CD16+ cells            | 0         | 0         | 10          |                                                  |                                    |
| 14950 | Coxpression | M1223                                     | Genes constituting the PluNet protein-protein network shared by t      | 0         | 0         | 10          |                                                  |                                    |
| 14951 | Coxpression | M11429                                    | Genes up-regulated by adrenergic expression of c-ATC (GeneID=460       | 0         | 0         | 10          |                                                  |                                    |
| 14952 | Coxpression | M1710                                     | Genes changed in Rat1a cells (fibroblasts) by overexpression of HMM    | 0         | 0         | 10          |                                                  |                                    |
| 14953 | Coxpression | GSE21522_WT_vs_PPARG_KO_MACROPHAGE_DN     | Genes down-regulated in bone marrow-derived macrophages: wildt         | 0         | 0         | 10          |                                                  |                                    |
| 14954 | Coxpression | 17409433-Table1a                          | Human Ovarian_Maloney07_84genes                                        | 4.217427  | 0         | 5.622003937 | HNHNPM,RP135,XRCXC                               |                                    |
| 14955 | Coxpression | M4495                                     | Substrates of PRKDC (GeneID=5591)                                      | 5.9562891 | 0         | 3.873072356 | RAP1,XRCXC,XRCXC                                 |                                    |
| 14956 | Coxpression | M4467                                     | Genes down-regulated in comparison of neutrophils versus monocy        | 0         | 3.483888  | 5.98653117  | NAP11,RP524,SPFQ                                 |                                    |
| 14957 | Coxpression | M19745                                    | Genes down-regulated in mature plasma cells compared with plasm        | 0         | 4.854129  | 0           | 4.473530296                                      | IGHA1,KIF11,PWP1,RP1A,RP1A         |
| 14958 | Coxpression | M4473                                     | Genes up-regulated in comparison of naive CD4 (GeneID=920) B T         | 4.29823   | 0         | 0.501110077 | DNAUCS,HNHNPM,PWP1,RP1A                          |                                    |
| 14959 | Coxpression | M2331                                     | Genes translationally repressed by PuChemi (GeneID=12046)              | 0         | 0.78531   | 0           | 4.00713667                                       | NAP11,RP1,RP1,RP36                 |
| 14960 | Coxpression | M3867                                     | Genes up-regulated in comparison of dendritic cells (DC) stimulated    | 0         | 0.504084  | 0           | 4.01430278                                       | EFSA,PURA,RP13,WDRI2               |
| 14961 | Coxpression | 17177833-Supptable1                       | Human Ovarian_Baranova06_907genes_Sertoli02eq                          | 3.759228  | 0         | 5.133959398 | HNHNPM,HNHNPM,HPA1,KIF11,PWP1,RRBP6              |                                    |
| 14962 | Coxpression | M7995                                     | Genes from 'subtype 52' signature of hepatocellular carcinoma (HCC     | 0         | 0.419415  | 0           | 5.15518408                                       | NAP11,RP519,RP524                  |
| 14963 | Coxpression | 18667080-Table52                          | Human StemCell_Kocor08_864genes                                        | 2.995858  | 0         | 0.63392523  | DNAUCS,HNHNPM,HNHNPM,KIF11,PWP1                  |                                    |
| 14964 | Coxpression | M5129                                     | Genes down-regulated in comparison of effector CD8 T cells versus r    | 0         | 3.483888  | 5.90111007  | 0                                                | PURA,RP518,RP519                   |
| 14965 | Coxpression | M18086                                    | 'Cancer gene response profile' (CPRP): genes common to estradiol a     | 0         | 0.951947  | 2.474359066 | 0                                                | RP136,RP56,SPFQ,TXN                |
| 14966 | Coxpression | M5916                                     | Genes constituting the BRCA2-PC2 network of transcripts whose exp      | 0         | 4.195727  | 0           | 1.13688018                                       | DHXS1,DNAUCS,KIF11,RP1A,XRCXC      |
| 14967 | Coxpression | 16627760-Table1                           | Human Leukemia_Rothme06_85genes                                        | 0         | 2.85142   | 5.99113397  | 0                                                | RP519,RP56                         |
| 14968 | Coxpression | M480                                      | Genes up-regulated in TC1 and ENH202 cells (Ewing's sarcoma) by        | 0         | 4.554278  | 3.449508416 | BRX1,DHXS1,DNAUCS,HNHNPM,HNHNPM,KIF11,RP1A,XRCXC | RP13,RP13A,RP1A,RP1,RP7A,RP519     |
| 14969 | Coxpression | M5382                                     | Genes down-regulated in comparison of memory CD4 (GeneID=920)          | 0         | 2.947984  | 0           | 3.001110077                                      | DNAUCS,HNHNPM,PWP1,RP1A            |
| 14970 | Coxpression | M2394                                     | Genes down-regulated in 745A cells (erythroleukemia) upon knockd       | 0         | 3.935563  | 0           | 3.92608669                                       | DDX24,HNHNPM,NOL6                  |
| 14971 | Coxpression | 18759322-Table52                          | Human Breast_Creighton08_952genes                                      | 3.49212   | 0         | 4.21672406  | BRX1,NOL6,NOP2                                   | DDX21,DDX24,HNFP,HSP41,MPDH2       |
| 14972 | Coxpression | M15150                                    | Genes up-regulated in cancer stem cells isolated from mammary tu       | 4.180305  | 0         | 3.41986211  | DNAUCS,HNHNPM,PWP1,RP1A,XRCXC                    | DENL1,DENL2,HSP40,HSP90,PJUM1,TPM1 |
| 14973 | Coxpression | M4375                                     | Cluster G1: genes most highly up-regulated in NHEK cells (normal e     | 0         | 0.3014957 | 0           | 5.88118451                                       | MTLE,RP130,RP13,RP52,SNRP          |
| 14974 | Coxpression | M3970                                     | Genes up-regulated in comparison of dendritic cells (DC) stimulated    | 0         | 4.29823   | 0.203784121 | BRX1,NOP2,PWP1,RP1A                              | HSP41,MPDH2,NOP2,PWP1,RP1A,RP3A    |
| 14975 | Coxpression | M16189                                    | Genes up-regulated in NH3T3 cells (fibroblasts)                        |           |           |             |                                                  |                                    |











|       |               |             |                        |          |             |                                      |                          |  |
|-------|---------------|-------------|------------------------|----------|-------------|--------------------------------------|--------------------------|--|
| 15804 | Computational | GNF2_NPM1   | Neighborhood of NPM1   | 0        | 4.089229    | 10                                   | NAP11.RPS24.RPS6         |  |
| 15805 | Computational | MORF_JUND   | Neighborhood of JUND   | 0        | 4.00385     | 10                                   | RLP31.RPS24.RPS6         |  |
| 15806 | Computational | GNF2_XRCC5  | Neighborhood of XRCC5  | 3.800523 | 0           | 10                                   | DHX15.RPA1.XRCC5         |  |
| 15807 | Computational | GCM_PSM1    | Neighborhood of PSM1   | 0        | 3.727246    | 10                                   | NAP11.RPS19.RPS24        |  |
| 15808 | Computational | GNF2_DAP3   | Neighborhood of DAP3   | 0        | 3.370445    | 10                                   | RLP31.RPS24.RPS6         |  |
| 15809 | Computational | GCM_APEX1   | Neighborhood of APEX1  | 0        | 3.333822    | 10                                   | NAP11.RPS19.RPS24        |  |
| 15810 | Computational | MORF_EIF356 | Neighborhood of EIF356 | 0        | 3.275121    | 10                                   | NAP11.RPS24.RPS6         |  |
| 15811 | Computational | module_151  | Genes in module_151    | 0        | 3.059269    | 10                                   | NAP11.RLP1.RLP19.RPS24   |  |
| 15812 | Computational | module_114  | Genes in module_114    | 0        | 2.961939    | 10                                   | NAP11.RLP1.RPS19.RPS24   |  |
| 15813 | Computational | GNF2_GLTSR2 | Neighborhood of GLTSR2 | 2.91096  | 0           | 10                                   | RLP23.RAPL35             |  |
| 15814 | Computational | MORF_GZP21  | Neighborhood of GZP21  | 2.762052 | 0           | 10                                   | DHX15.XRCC5.XRCC6        |  |
| 15815 | Computational | MORF_ANP328 | Neighborhood of ANP328 | 0        | 2.681007    | 10                                   | NAP11.RPS24.RPS6         |  |
| 15816 | Computational | MORF_ACP1   | Neighborhood of ACP1   | 2.471879 | 0           | 10                                   | DHX15.XRCC5.XRCC6        |  |
| 15817 | Computational | GNF2_KPNB1  | Neighborhood of KPNB1  | 2.38658  | 0           | 10                                   | DHX15.XRCC5              |  |
| 15818 | Computational | MORF_CCNI   | Neighborhood of CCNI   | 0        | 2.236572    | 10                                   | NAP11.RPS6               |  |
| 15819 | Computational | MORF_DEK    | Neighborhood of DEK    | 2.168048 | 0           | 10                                   | RPA1.XRCC5.XRCC6         |  |
| 15820 | Computational | MORF_BUB3   | Neighborhood of BUB3   | 2.0471   | 0           | 10                                   | DNAIC5.XRCC5.XRCC6       |  |
| 15821 | Computational | module_244  | Genes in module_244    | 10       | 2.020841624 | DHX15.NRNP191.HSPA1L.HF1.XRCC5.XRCC6 |                          |  |
| 15822 | Computational | GNF2_RPA1   | Neighborhood of RPA1   | 5.213814 | 0           | 5.684202597                          | DHX15.RPA1.XRCC5         |  |
| 15823 | Computational | GCM_CSNK28  | Neighborhood of CSNK28 | 0        | 0           | 10                                   |                          |  |
| 15824 | Computational | MORF_EIF352 | Neighborhood of EIF352 | 0        | 0           | 10                                   |                          |  |
| 15825 | Computational | GNF2_APEX1  | Neighborhood of APEX1  | 0        | 0           | 10                                   |                          |  |
| 15826 | Computational | MORF_FBL    | Neighborhood of FBL    | 0        | 0           | 10                                   |                          |  |
| 15827 | Computational | GNF2_RAN    | Neighborhood of RAN    | 0        | 0           | 10                                   |                          |  |
| 15828 | Computational | GNF2_BUB3   | Neighborhood of BUB3   | 3.210922 | 0           | 5.684202597                          | RPA1.XRCC5               |  |
| 15829 | Computational | MORF_HDAC2  | Neighborhood of HDAC2  | 3.096467 | 0           | 5.004041897                          | DNAIC5.PWP1.RPA1.XRCC5   |  |
| 15830 | Computational | GCM_PPN1    | Neighborhood of PPN1   | 0        | 2.650741    | 5.127650889                          | RPS19.RPS24              |  |
| 15831 | Computational | GNF2_ELAC2  | Neighborhood of ELAC2  | 2.856641 | 0           | 4.767104233                          | DHX15.RPA1               |  |
| 15832 | Computational | MORF_XRCC5  | Neighborhood of XRCC5  | 2.281064 | 0           | 5.061178199                          | DNAIC5.XRCC5.XRCC6       |  |
| 15833 | Computational | GNF2_TDG    | Neighborhood of TDG    | 3.064375 | 0           | 3.92628816                           | DHX15.RPA1               |  |
| 15834 | Computational | MORF_RAD21A | Neighborhood of RAD21A | 2.760841 | 0           | 4.114062363                          | DHX15.DNAIC5.XRCC5.XRCC6 |  |
| 15835 | Computational | GNF2_GZP21  | Neighborhood of GZP21  | 2.91096  | 0           | 3.619710132                          | DHX15.XRCC6              |  |
| 15836 | Computational | MORF_RRM1   | Neighborhood of RRM1   | 3.347949 | 0           | 2.672925881                          | DNAIC5.XF1.XRCC5         |  |
| 15837 | Computational | MORF_SART1  | Neighborhood of SART1  | 0        | 5.960201889 |                                      |                          |  |
| 15838 | Computational | MORF_CD2    | Neighborhood of CD2    | 2.281335 | 0           | 3.366259589                          | PWP1.XRCC5               |  |
| 15839 | Computational | GNF2_DEK    | Neighborhood of DEK    | 2.53429  | 0           | 2.884749602                          | DHX15.RPA1               |  |
| 15840 | Computational | module_281  | Genes in module_281    | 0        | 5.132851912 |                                      |                          |  |
| 15841 | Computational | MORF_PCNA   | Neighborhood of PCNA   | 0        | 5.079365444 |                                      |                          |  |
| 15842 | Computational | MORF_UBE2N  | Neighborhood of UBE2N  | 2.068936 | 0           | 2.850321213                          | DHX15.DNAIC9             |  |
| 15843 | Computational | GNF2_XS     | Neighborhood of XS     | 0        | 4.637933252 |                                      |                          |  |
| 15844 | Computational | GNF2_HAT1   | Neighborhood of HAT1   | 2.551481 | 0           | 1.941846899                          | DHX15.RPA1               |  |
| 15845 | Computational | MORF_AATF   | Neighborhood of AATF   | 0        | 4.090817498 |                                      |                          |  |
| 15846 | Computational | GNF2_PAG24  | Neighborhood of PAG24  | 0        | 4.076250307 |                                      |                          |  |
| 15847 | Computational | MORF_EIH    | Neighborhood of EIH    | 0        | 4.060375967 |                                      |                          |  |
| 15848 | Computational | module_371  | Genes in module_371    | 0        | 3.995514626 |                                      |                          |  |
| 15849 | Computational | MORF_HAT1   | Neighborhood of HAT1   | 0        | 3.73870216  |                                      |                          |  |
| 15850 | Computational | GNF2_UBE2I  | Neighborhood           |          |             |                                      |                          |  |





|            |               |                                                                      |          |   |             |                             |
|------------|---------------|----------------------------------------------------------------------|----------|---|-------------|-----------------------------|
| 16239 Drug | CID000277380  | 1263200                                                              | 2.963689 | 0 | 0           | KFF11                       |
| 16240 Drug | D0801958      | [4R]-4-(3-HYDROXYPHENYL)-1,6-DIMETHYL-2-THIOXO-1,2,3,4-TETRA         | 2.963689 | 0 | 0           | KFF11                       |
| 16241 Drug | CID000279383  | NSC-129872                                                           | 2.963689 | 0 | 0           | KFF11                       |
| 16242 Drug | D080837       | (2S)-4-(2,5-difluorophenyl)-N-[(3R,4S)-3-fluoro-1-methylpiperidin-4- | 2.963689 | 0 | 0           | KFF11                       |
| 16243 Drug | CID000420629  | NSC-125681                                                           | 2.963689 | 0 | 0           | KFF11                       |
| 16244 Drug | D082678       | 2-Deoxy-2-Aminogalactose                                             | 2.963689 | 0 | 0           | IGAS17                      |
| 16245 Drug | D082850       | (5S)-5-[3-AMINOPROPYL]-3-(2,5-DIFLUOROPHENYL)-N-ETHYL-5-PHE          | 2.963689 | 0 | 0           | KFF11                       |
| 16246 Drug | D080833       | (5R)-N,N-DIETHYL-5-METHYL-2-(THIOPHEN-2-YLCARBONYLAMINO)             | 2.963689 | 0 | 0           | KFF11                       |
| 16247 Drug | CID000275979  | NSC-123140                                                           | 2.963689 | 0 | 0           | KFF11                       |
| 16248 Drug | CID000420691  | NSC-126217                                                           | 2.963689 | 0 | 0           | KFF11                       |
| 16249 Drug | C003724       | 3-Trihydro-L-alanine                                                 | 2.963689 | 0 | 0           | KFF11                       |
| 16250 Drug | CID000276218  | NSC-123531                                                           | 2.963689 | 0 | 0           | KFF11                       |
| 16251 Drug | D00067956     | Adenyllyl Cyclase inhibitors                                         | 2.963689 | 0 | 0           | SGSTM1                      |
| 16252 Drug | CID000433582  | NSC-333329                                                           | 2.963689 | 0 | 0           | KFF11                       |
| 16253 Drug | C477863       | terpenoid E                                                          | 2.963689 | 0 | 0           | KFF11                       |
| 16254 Drug | C400223       | monostrol                                                            | 2.963689 | 0 | 0           | KFF11                       |
| 16255 Drug | D080844       | (1S)-1-CYCLOPROPYL-2-[(2S)-4-(2,5-DIFLUOROPHENYL)-2-PHENYL-2,        | 2.963689 | 0 | 0           | KFF11                       |
| 16256 Drug | NSC05288685   | D803996                                                              | 2.963689 | 0 | 0           | KFF11                       |
| 16257 Drug | D080246       | (2S)-4-(2,5-DIFLUOROPHENYL)-N,N-DIMETHYL-2-PHENYL-2,5-DIHYD          | 2.963689 | 0 | 0           | KFF11                       |
| 16258 Drug | CID000215628  | AC1C3ED9                                                             | 2.963689 | 0 | 0           | KFF11                       |
| 16259 Drug | CID000277164  | NSC-125680                                                           | 2.963689 | 0 | 0           | KFF11                       |
| 16260 Drug | D080832       | N,N-DIETHYL-2-[(2-THIENYLCARBONYLAMINO)-4,5,6,7-TETRAHYDRO]          | 2.963689 | 0 | 0           | KFF11                       |
| 16261 Drug | CID000098425  | NSC 127736                                                           | 2.963689 | 0 | 0           | KFF11                       |
| 16262 Drug | C508757       | spiroide                                                             | 2.963689 | 0 | 0           | KFF11                       |
| 16263 Drug | D080839       | (2S)-4-(2,5-DIFLUOROPHENYL)-N-METHYL-2-PHENYL-N-PIPERIDIN-4-         | 2.963689 | 0 | 0           | KFF11                       |
| 16264 Drug | CID0004021849 | NSC-138932                                                           | 2.963689 | 0 | 0           | KFF11                       |
| 16265 Drug | CID000275521  | NSC-122406                                                           | 2.963689 | 0 | 0           | KFF11                       |
| 16266 Drug | 5577279       | SB 749321                                                            | 2.963689 | 0 | 0           | KFF11                       |
| 16267 Drug | CID000276200  | NSC-123492                                                           | 2.963689 | 0 | 0           | KFF11                       |
| 16268 Drug | D843533       | HR22C16                                                              | 2.963689 | 0 | 0           | KFF11                       |
| 16269 Drug | CID016122639  | K03                                                                  | 2.963689 | 0 | 0           | KFF11                       |
| 16270 Drug | CID000275978  | NSC-123139                                                           | 2.963689 | 0 | 0           | KFF11                       |
| 16271 Drug | C487201       | CX0106023                                                            | 2.963689 | 0 | 0           | KFF11                       |
| 16272 Drug | CID000420441  | NSC-123494                                                           | 2.963689 | 0 | 0           | KFF11                       |
| 16273 Drug | CID000007778  | citronellyl formate                                                  | 2.963689 | 0 | 0           | RPA1                        |
| 16274 Drug | CID000011902  | m650                                                                 | 2.963689 | 0 | 0           | BRX1                        |
| 16275 Drug | D084331       | Menastrol                                                            | 2.963689 | 0 | 0           | KFF11                       |
| 16276 Drug | CID011539950  | MXK                                                                  | 2.963689 | 0 | 0           | KFF11                       |
| 16277 Drug | CID000276216  | NSC-123527                                                           | 2.963689 | 0 | 0           | KFF11                       |
| 16278 Drug | CID010309476  | SureNC3617760                                                        | 2.963689 | 0 | 0           | KFF11                       |
| 16279 Drug | CID006857690  | 2fme                                                                 | 2.963689 | 0 | 0           | KFF11                       |
| 16280 Drug | C530952       | 4-(2,5-difluorophenyl)-N-(3-fluoro-1-methylpiperidin-4-yl)-2-(hydro  | 2.963689 | 0 | 0           | KFF11                       |
| 16281 Drug | CID000012810  | delta-decalactone                                                    | 2.963689 | 0 | 0           | BRX1                        |
| 16282 Drug | CID011442529  | SureNC369457                                                         | 2.963689 | 0 | 0           | KFF11                       |
| 16283 Drug | D080842       | NSC-140715                                                           | 2.963689 | 0 | 0           | KFF11                       |
| 16284 Drug | D080764       | [4R]-4-(3-HYDROXYPHENYL)-N,N,7,8-TETRAMETHYL-3,4-DIHYDROIS           | 2.963689 | 0 | 0           | KFF11                       |
| 16285 Drug | CID000420454  | NSC-123528                                                           | 2.963689 | 0 | 0           | KFF11                       |
| 16286 Drug | CID000212677  | 1,1,6-trimethyl-1,2-dihydronaphthalene                               | 2.963689 | 0 | 0           | BRX1                        |
| 16287 Drug | CID000000516  | AC1Q6TQK                                                             | 2.963499 | 0 | 0           | KRCCS,KRCC6                 |
| 16288 Drug | CID000440315  | CD4378                                                               | 0        | 0 | 2.954844051 | CIQBP,H2AFV,HST1H2A,HST1H4A |
| 16289 Drug | CID000123719  | MAPTAM                                                               | 0        | 0 | 2.953784236 | ML12A,MYL6B,MY19            |
| 16290 Drug | CID000003     |                                                                      |          |   |             |                             |

|       |                                   |                         |                                         |          |             |             |  |                                             |
|-------|-----------------------------------|-------------------------|-----------------------------------------|----------|-------------|-------------|--|---------------------------------------------|
| 16384 | Cytoband                          | 9p21                    | 9p21                                    | 0        | 1.861323    | 0           |  | RP56                                        |
| 16385 | Cytoband                          | 1p34.3                  | 1p34.3                                  | 0        | 1.522776    | 0           |  | SPFQ                                        |
| 16386 | Cytoband                          | 1q41                    | 1q41                                    | 0        | 1.515839    | 0           |  | RRP15                                       |
| 16387 | Cytoband                          | 2q11.2                  | 2q11.2                                  | 0        | 1.473337    | 0           |  | RLP31                                       |
| 16388 | Transcription Factor Binding Site | KRCTCNHNNMANAGC_UNKNOWN | KRCTCNHNNMANAGC_UNKNOWN                 | 0        | 0           | 5.69750698  |  |                                             |
| 16389 | Transcription Factor Binding Site | TMTCTCGGAGN_UNKNOWN     | TMTCTCGGAGN_UNKNOWN                     | 5.013193 | 0           | 3.74482094  |  | HNRPK.PURA.RP518.RP56                       |
| 16390 | Transcription Factor Binding Site | TTTNMANAGCVR_UNKNOWN    | TTTNMANAGCVR_UNKNOWN                    | 0        | 0           | 3.74482094  |  |                                             |
| 16391 | Transcription Factor Binding Site | SCGGAAAGY_V\$ELK1_02    | SCGGAAAGY_V\$ELK1_02                    | 0        | 0           | 3.596402356 |  |                                             |
| 16392 | Transcription Factor Binding Site | SCGGSSAAA_V\$EF2IDP_01  | SCGGSSAAA_V\$EF2IDP_01                  | 0        | 0           | 3.532030075 |  |                                             |
| 16393 | Mouse Phenotype                   | MP-0000350              | abnormal cell proliferation             | 0        | 4.483441915 | 0           |  | DNACB3.NCAPH1.HIST1H4A.HNRWFO.A1A.MTH105.NC |
| 16394 | Mouse Phenotype                   | MP-0000352              | decreased cell proliferation            | 0        | 4.39562674  | 0           |  | ATF3B1.NCAPH1.HIST1H4A.HNRWFO.A1A.MTH105.NC |
| 16395 | Mouse Phenotype                   | MP-0006204              | embryonic lethality before implantation | 0        | 4.204466617 | 0           |  | AATF.CCZ3.EFG.GSL3.LMPH2.RPL4.RPL519        |
