# Supplementary material
Source: PubMed Central journal article supplement (PMC5730476)
Supplement: NIHMS916645-supplement-Supp5.pdf [file NIHMS916645-supplement-Supp5.pdf]

## Untreated Hits

| SL. No. | Gene              | Protein  | Description                                                                                                                            | ENSEMBL           | Peptides >3.0 | Peptide All | Score |
|---------|-------------------|----------|----------------------------------------------------------------------------------------------------------------------------------------|-------------------|---------------|-------------|-------|
| 1       | DEK               | P35659   | DEK Protein DEK                                                                                                                        | ENSP00000244776   | 33            | 141         | 3.4   |
| 2       | CSNK2A1           |          | CSNK2A1 CSNK2A1 protein                                                                                                                | ENSP00000371400.1 | 23            | 67          | 3.604 |
| 3       | HSPA5             | P11021   | HSPA5 HSPA5 protein                                                                                                                    | ENSP00000324173   | 12            | 12          | 3.664 |
| 4       | CSNK2A2           | P19784   | CSNK2A2 Casein kinase II subunit alpha                                                                                                 | ENSP00000262506   | 12            | 21          | 2.838 |
| 5       | NPM1              | P06748-2 | NPM1 Isoform 2 of Nucleophosmin                                                                                                        | ENSP00000341168   | 11            | 14          | 3.447 |
| 6       | HSPA8             | P11142-1 | HSPA8 Isoform 1 of Heat shock cognate 71 kDa protein                                                                                   | ENSP00000227378   | 9             | 11          | 3.523 |
| 7       | RPLP0             | P05388   | RPLP0 60S acidic ribosomal protein P0                                                                                                  | ENSP00000339027   | 8             | 9           | 3.474 |
| 8       | LY6G5B            | P67870   | LY6G5B;CSNK2B Casein kinase II subunit beta                                                                                            | ENSP00000365025   | 6             | 9           | 3.529 |
| 9       | EBNA1BP2          | Q99848   | EBNA1BP2 Probable rRNA-processing protein EBP2                                                                                         | ENSP00000236051   | 6             | 8           | 3.369 |
| 10      | C1QBP             | Q07021   | C1QBP Complement component 1 Q subcomponent-binding protein, mitochondria                                                              | ENSP00000225698   | 5             | 9           | 4.125 |
| 11      | IMPDH2            | P12268   | IMPDH2 Inosine-5'-monophosphate dehydrogenase                                                                                          | ENSP00000321584   | 5             | 5           | 3.435 |
| 12      | HSPA9             | P38646   | HSPA9 Stress-70 protein, mitochondria                                                                                                  | ENSP00000297185   | 5             | 5           | 3.235 |
| 13      | HIST1H1C          | P16403   | HIST1H1C Histone H1.C                                                                                                                  | ENSP00000339566   | 5             | 6           | 3.184 |
| 14      | RPL7              | P18124   | RPL7;RPL7P32 60S ribosomal protein L7                                                                                                  | ENSP00000339795   | 5             | 5           | 3.158 |
| 15      | RPL4              | P36578   | RPL4 60S ribosomal protein L4                                                                                                          | ENSP00000311430   | 5             | 6           | 3.048 |
| 16      | DDX21             | Q9NR30-1 | DDX21 Isoform 1 of Nucleolar RNA helicase                                                                                              | ENSP00000346120   | 4             | 5           | 3.101 |
| 17      | RPL3              | P39023   | RPL3 60S ribosomal protein L3                                                                                                          | ENSP00000346001   | 4             | 4           | 3.024 |
| 18      | RPL8              | P62917   | RPL8 60S ribosomal protein L8                                                                                                          | ENSP00000262584   | 4             | 4           | 2.929 |
| 19      | TUBA1C            |          | TUBA1C TUBA1C protein                                                                                                                  | ENSP00000322707   | 3             | 3           | 4.111 |
| 20      | PPM1G             | O15355   | PPM1G Protein phosphatase 1G                                                                                                           | ENSP00000264714   | 3             | 3           | 3.92  |
| 21      | RPL19             | P84098   | RPL19 60S ribosomal protein L19                                                                                                        | ENSP00000225430   | 3             | 3           | 3.798 |
| 22      | RPL7A             | P62424   | RPL7A 60S ribosomal protein L7A                                                                                                        | ENSP00000361076   | 3             | 3           | 3.294 |
| 23      | RPL6              | Q02878   | RPL6 60S ribosomal protein L6                                                                                                          | ENSP00000202773   | 3             | 3           | 3.251 |
| 24      | RPL21P19          | P46778   | RPL21P19;RPL21;RPL21P16 60S ribosomal protein L21                                                                                      | ENSP00000346027   | 3             | 3           | 3.003 |
| 25      | RPL5              | P46777   | RPL5 60S ribosomal protein L5                                                                                                          | ENSP00000359345   | 3             | 4           | 2.96  |
| 26      | RPL15             | P61313   | RPL15 60S ribosomal protein L15                                                                                                        | ENSP00000309334   | 3             | 3           | 2.856 |
| 27      | RPL13             | P26373   | RPL13 60S ribosomal protein L13                                                                                                        | ENSP00000307889   | 3             | 3           | 2.839 |
| 28      | RPL13A            | P40429   | RPL13A 60S ribosomal protein L13A                                                                                                      | ENSP00000270634   | 3             | 3           | 2.752 |
| 29      | SFPQ              | P23246-1 | SFPQ Isoform Long of Splicing factor, proline- and glutamine-ric                                                                       | ENSP00000349748   | 3             | 4           | 2.517 |
| 30      | RPS6              | P62753   | RPS6 40S ribosomal protein S6                                                                                                          | ENSP00000369757   | 3             | 3           | 2.415 |
| 31      | YBX1              | P67809   | YBX1 Nuclease-sensitive element-binding protein                                                                                        | ENSP00000361626   | 2             | 2           | 4.548 |
| 32      | RPL11             | P62913-1 | RPL11 Isoform 1 of 60S ribosomal protein L11                                                                                           | ENSP00000363676   | 2             | 2           | 3.576 |
| 33      | RPS8              | P62241   | RPS8 40S ribosomal protein S8                                                                                                          | ENSP00000379888   | 2             | 2           | 3.471 |
| 34      | CSDA              | P16989-1 | CSDA Isoform 1 of DNA-binding protein                                                                                                  | ENSP00000228251   | 2             | 2           | 3.449 |
| 35      | RPL10AP3          |          | RPL10AP3 Ribosomal protein L10                                                                                                         | ENSP00000382780   | 2             | 2           | 2.833 |
| 36      | RPL7AP27          |          | RPL7AP27 similar to ribosomal protein L77                                                                                              |                   | 2             | 2           | 2.789 |
| 37      | HSPA7             | P48741   | Tax HSPA7 Putative heat shock 70 kDa protein                                                                                           |                   | 2             | 2           | 2.754 |
| 38      | RPL10A            | P62906   | RPL10A 60S ribosomal protein L10A                                                                                                      | ENSP00000355258   | 2             | 2           | 2.687 |
| 39      | RPL13P12          |          | RPL13P12 similar to RPL13 protein                                                                                                      |                   | 2             | 2           | 2.654 |
| 40      | GRWD1             | Q9BQ67   | GRWD1 Glutamate-rich WD repeat-containing protein                                                                                      | ENSP00000253237   | 1             | 1           | 4.87  |
| 41      | SET               | Q01105-1 | SET Isoform 1 of Protein SET                                                                                                           | ENSP00000361777   | 1             | 1           | 4.742 |
| 42      | RPL18             | Q07020   | RPL18 60S ribosomal protein L18                                                                                                        | ENSP00000084795   | 1             | 1           | 4.393 |
| 43      | PURA              | Q00577   | PURA Transcriptional activator protein Pur-alpha                                                                                       | ENSP00000332706   | 1             | 1           | 4.336 |
| 44      | RPL29P30          |          | RPL29P30 similar to hCG1641491 isoform                                                                                                 |                   | 1             | 1           | 4.29  |
| 45      | HNRNPF            | P52597   | HNRNPF Heterogeneous nuclear ribonucleoprotein                                                                                         | ENSP00000338477   | 1             | 1           | 4.143 |
| 46      | HSPA1A            | P08107   | HSPA1A;HSPA1B Heat shock 70 kDa protein                                                                                                | ENSP00000364801   | 1             | 1           | 4.11  |
| 47      | NAP1L1            | P55209   | NAP1L1 Nucleosome assembly protein 1-like                                                                                              | ENSP00000261182   | 1             | 1           | 3.781 |
| 48      | RPS9              | P46781   | RPS9 40S ribosomal protein S9                                                                                                          | ENSP00000302896   | 1             | 1           | 3.74  |
| 49      | IP1:IP100384397.1 |          | Myosin-reactive immunoglobulin light chain variable region (Fragment)                                                                  |                   | 1             | 1           | 3.63  |
| 50      | TUBA4A            | P68366   | TUBA4A Tubulin alpha-4A chain                                                                                                          | ENSP00000248437   | 1             | 1           | 3.532 |
| 51      | WDR12             | Q9GZL7   | WDR12 Ribosome biogenesis protein WDR12                                                                                                | ENSP00000261015   | 1             | 1           | 3.419 |
| 52      | HNRNPK            | P61978-1 | HNRNPK Isoform 1 of Heterogeneous nuclear ribonucleoprotein                                                                            | ENSP00000317788   | 1             | 1           | 3.339 |
| 53      | IP1:IP100069693.4 |          | Putative uncharacterized protein RPL14P                                                                                                | ENSP00000350479   | 1             | 1           | 3.2   |
| 54      | RBM28             | Q9NW13   | RBM28 RNA-binding protein 28                                                                                                           | ENSP00000223073   | 1             | 1           | 3.162 |
| 55      | EEF1A2            | Q05639   | EEF1A2 Elongation factor 1-alpha                                                                                                       | ENSP00000217182   | 1             | 1           | 3.084 |
| 56      | HIST1H1B          | P16401   | HIST1H1B Histone H1.B                                                                                                                  | ENSP00000330074   | 1             | 1           | 2.878 |
| 57      | TUBB              | P07437   | TUBB Tubulin beta chain                                                                                                                | ENSP00000259925   | 1             | 1           | 2.809 |
| 58      | RRP15             | Q9Y3B9   | RRP15 RRP15-like protein                                                                                                               | ENSP00000184772   | 1             | 1           | 2.573 |
| 59      | HIST1H4J          | P62805   | HIST1H4J;HIST1H4E;HIST1H4H;HIST1H4K;HIST2H4A;HIST1H4D;HIST1H4F;HIST2H4B;HIST1H4C;HIST1H4B;HIST1H4I;HIST1H4L;HIST1H4A;HIST4H4 Histone H | ENSP00000289352   | 6             | 7           | 2.92  |
| 60      | RPLP2             | P05387   | RPLP2 60S acidic ribosomal protein P2                                                                                                  | ENSP00000322419   | 5             | 5           | 4.23  |
| 61      | DEK               | P35659   | DEK Protein DEK                                                                                                                        | ENSP00000244776   | 4             | 4           | 3.179 |
| 62      | RPL26L1           | Q9UNX3   | RPL26L1 60S ribosomal protein L26-like                                                                                                 | ENSP00000265100   | 4             | 4           | 2.884 |
| 63      | RPL27             | P61353   | RPL27 60S ribosomal protein L27                                                                                                        | ENSP00000253788   | 4             | 4           | 2.766 |
| 64      | HIST2H2BE         | Q16778   | HIST2H2BE Histone H2B type 2-BE                                                                                                        | ENSP00000336417   | 4             | 5           | 2.653 |

|    |           |          |                                                                                                      |                 |   |   |       |
|----|-----------|----------|------------------------------------------------------------------------------------------------------|-----------------|---|---|-------|
| 65 | RPL12     | P30050-1 | RPL12 Isoform 1 of 60S ribosomal protein L12                                                         | ENSP00000354739 | 4 | 5 | 2.426 |
| 66 | RPS19     | P39019   | RPS19 40S ribosomal protein S19                                                                      | ENSP00000221975 | 3 | 3 | 2.777 |
| 67 | SSBP1     | Q04837   | SSBP1 Single-stranded DNA-binding protein, mitochondria                                              | ENSP00000265304 | 2 | 3 | 4.207 |
| 68 | RPL36     | Q9Y3U8   | RPL36 60S ribosomal protein L36                                                                      | ENSP00000252543 | 2 | 2 | 2.964 |
| 69 | RPL28     | P46779   | RPL28 60S ribosomal protein L28                                                                      | ENSP00000342787 | 2 | 2 | 2.689 |
| 70 | HIST2H3D  | Q71DI3   | HIST2H3D;HIST2H3C;HIST2H3A Histone H3.D                                                              | ENSP00000333277 | 2 | 2 | 2.569 |
| 71 | RPL34     | P49207   | RPL34 60S ribosomal protein L34                                                                      | ENSP00000378160 | 2 | 2 | 2.524 |
| 72 | ANXA2P2   | A6NMY6   | ANXA2P2 Putative annexin A2-like protein                                                             |                 | 2 | 2 | 2.381 |
| 73 | EIF5A     | P63241-2 | EIF5A Isoform 2 of Eukaryotic translation initiation factor 5A                                       | ENSP00000336702 | 2 | 2 | 2.314 |
| 74 | HIST1H2BL | Q99880   | HIST1H2BL Histone H2B type 1-L                                                                       | ENSP00000366618 | 2 | 2 | 2.313 |
| 75 | RPL31     | P62899   | RPL31 60S ribosomal protein L3                                                                       | ENSP00000264258 | 2 | 2 | 2.166 |
| 76 | SRP14     | P37108   | SRP14 Signal recognition particle 14 kDa protein                                                     | ENSP00000267884 | 1 | 1 | 4.906 |
| 77 | TXN       | P10599   | TXN Thioredoxin                                                                                      | ENSP00000363641 | 1 | 1 | 3.776 |
| 78 | HIST1H2AH | Q96KK5   | HIST1H2AH;HIST1H2AL;HIST1H2AG;HIST1H2AJ;HIST1H2AK;HIST1H2AI;HIST1H2AM Histone H2A                    | ENSP00000366679 | 1 | 1 | 3.766 |
| 79 | RPS13     | P62277   | RPS13 40S ribosomal protein S13                                                                      | ENSP00000228140 | 1 | 1 | 3.496 |
| 80 | RPL30     | P62888   | RPL30 60S ribosomal protein L30                                                                      | ENSP00000287038 | 1 | 1 | 3.416 |
| 81 | HIST1H2AB | P04908   | HIST1H2AB;HIST1H2AE;HIST1H2AL;HIST1H2AG;HIST1H2AJ;HIST1H2AK;HIST1H2AI;HIST1H2AM Histone H2A type 1-B | ENSP00000259791 | 1 | 1 | 3.27  |
| 82 | H2AFV     | Q71UI9   | H2AFV Histone H2A.F                                                                                  | ENSP00000308405 | 1 | 1 | 3.234 |
| 83 | RPL27A    | P46776   | RPL27A 60S ribosomal protein L27A                                                                    | ENSP00000346015 | 1 | 1 | 2.941 |
| 84 | RPS24     | P62847-1 | RPS24 Isoform 1 of 40S ribosomal protein S24                                                         | ENSP00000361435 | 1 | 1 | 2.882 |
| 85 | RPS18     | P62269   | RPS18;LOC100130553 40S ribosomal protein S18                                                         | ENSP00000211372 | 1 | 1 | 2.739 |
| 86 | RPL35A    | P18077   | RPL35A 60S ribosomal protein L35A                                                                    | ENSP00000330165 | 1 | 1 | 2.571 |
| 87 | TUBA1C    |          | TUBA1C TUBA1C protein                                                                                | ENSP00000322707 | 1 | 1 | 2.512 |

## HU-treated hits

| SL. No. | Gene              | Protein  | Description                                                               | ENSEMBL         | Peptides > 3.0 | Peptide All | Score |
|---------|-------------------|----------|---------------------------------------------------------------------------|-----------------|----------------|-------------|-------|
| 1       | DEK               | P35659   | DEK Protein DEK                                                           | ENSP00000244776 | 33             | 124         | 3.324 |
| 2       | CSNK2A1           |          | CSNK2A1 CSNK2A1 protein                                                   | ENSP00000371400 | 24             | 69          | 3.776 |
| 3       | CSNK2A2           | P19784   | CSNK2A2 Casein kinase II subunit alpha                                    | ENSP00000262506 | 16             | 24          | 3.154 |
| 4       | HSPA5             | P11021   | HSPA5 HSPA5 protein                                                       | ENSP00000324173 | 15             | 19          | 3.648 |
| 5       | HSPA8             | P11142-1 | HSPA8 Isoform 1 of Heat shock cognate 71 kDa protein                      | ENSP00000227378 | 15             | 17          | 3.378 |
| 6       | NPM1              | P06748-2 | NPM1 Isoform 2 of Nucleophosmin                                           | ENSP00000341168 | 11             | 16          | 4.078 |
| 7       | DDX21             | Q9NR30-1 | DDX21 Isoform 1 of Nucleolar RNA helicase                                 | ENSP00000346120 | 10             | 10          | 3.152 |
| 8       | RPLP0             | P05388   | RPLP0 60S acidic ribosomal protein P0                                     | ENSP00000339027 | 9              | 10          | 3.753 |
| 9       | HNRNPM            | P52272-1 | HNRNPM Isoform 1 of Heterogeneous nuclear ribonucleoprotein               | ENSP00000325376 | 9              | 9           | 3.291 |
| 10      | C1QBP             | Q07021   | C1QBP Complement component 1 Q subcomponent-binding protein, mitochondria | ENSP00000225698 | 8              | 10          | 4.061 |
| 11      | XRCC5             | P13010   | XRCC5 ATP-dependent DNA helicase 2 subunit                                | ENSP00000329528 | 8              | 8           | 2.867 |
| 12      | KIF11             | P52732   | KIF11 Kinesin-like protein KIF1                                           | ENSP00000260731 | 7              | 8           | 3.807 |
| 13      | LY6G5B            | P67870   | LY6G5B;CSNK2B Casein kinase II subunit beta                               | ENSP00000365025 | 7              | 14          | 3.311 |
| 14      | EBNA1BP2          | Q99848   | EBNA1BP2 Probable rRNA-processing protein EBP2                            | ENSP00000336051 | 7              | 8           | 3.18  |
| 15      | XRCC6             | P12956   | XRCC6 ATP-dependent DNA helicase 2 subunit                                | ENSP00000352257 | 6              | 6           | 3.443 |
| 16      | RBM28             | Q9NW13   | RBM28 RNA-binding protein 2                                               | ENSP00000223073 | 6              | 6           | 3.248 |
| 17      | RPL4              | P36578   | RPL4 60S ribosomal protein L4                                             | ENSP00000311430 | 6              | 7           | 3.096 |
| 18      | NOP2              |          | NOP2 Putative uncharacterized protein NOP2                                | ENSP00000313272 | 6              | 6           | 3.046 |
| 19      | RPL7              | P18124   | RPL7;RPL7P32 60S ribosomal protein L7                                     | ENSP00000339795 | 6              | 8           | 2.982 |
| 20      | HSPA9             | P38646   | HSPA9 Stress-70 protein, mitochondria                                     | ENSP00000297185 | 6              | 7           | 2.846 |
| 21      | RPL10A            | P62906   | RPL10A 60S ribosomal protein L10                                          | ENSP00000355258 | 6              | 8           | 2.819 |
| 22      | HIST1H1C          | P16403   | HIST1H1C Histone H1.C                                                     | ENSP00000339566 | 6              | 8           | 2.747 |
| 23      | RPL3              | P39023   | RPL3 60S ribosomal protein L3                                             | ENSP00000346001 | 5              | 5           | 3.556 |
| 24      | RPL19             | P84098   | RPL19 60S ribosomal protein L10                                           | ENSP00000225430 | 5              | 5           | 3.018 |
| 25      | RPL13P12          |          | RPL13P12 similar to RPL13 protein                                         |                 | 5              | 5           | 2.614 |
| 26      | RPL13             | P26373   | RPL13 60S ribosomal protein L13                                           | ENSP00000307889 | 4              | 4           | 2.766 |
| 27      | TUBA1C            |          | TUBA1C TUBA1C protei                                                      | ENSP00000322707 | 3              | 3           | 4.034 |
| 28      | HSPA1A            | P08107   | HSPA1A;HSPA1B Heat shock 70 kDa protein                                   | ENSP00000364801 | 3              | 3           | 3.652 |
| 29      | RPL18             | Q07020   | RPL18 60S ribosomal protein L18                                           | ENSP00000084795 | 3              | 3           | 3.521 |
| 30      | RPL11             | P62913-1 | RPL11 Isoform 1 of 60S ribosomal protein L11                              | ENSP00000363676 | 3              | 3           | 3.333 |
| 31      | MYH9              | P35579-1 | MYH9 Isoform 1 of Myosin-9                                                | ENSP00000216181 | 3              | 3           | 3.303 |
| 32      | HNRNPU            | Q00839-2 | HNRNPU Isoform Short of Heterogeneous nuclear ribonucleoprotein           | ENSP00000283179 | 3              | 4           | 3.124 |
| 33      | HSPA1L            | P34931   | HSPA1L Heat shock 70 kDa protein 1L                                       | ENSP00000364805 | 3              | 3           | 3.115 |
| 34      | RPL7A             | P62424   | RPL7A 60S ribosomal protein L7A                                           | ENSP00000361076 | 3              | 3           | 3.016 |
| 35      | STK38             | Q15208   | STK38 Serine/threonine-protein kinase 38                                  | ENSP00000229812 | 3              | 3           | 2.695 |
| 36      | RPL10AP3          |          | RPL10AP3 Ribosomal protein                                                | ENSP00000382780 | 3              | 3           | 2.659 |
| 37      | RPL23A            | P62750   | RPL23A 60S ribosomal protein L23A                                         | ENSP00000347969 | 3              | 3           | 2.463 |
| 38      | RPL6              | Q02878   | RPL6 60S ribosomal protein L6                                             | ENSP00000202773 | 3              | 3           | 2.065 |
| 39      | RPS8              | P62241   | RPS8 40S ribosomal protein S8                                             | ENSP00000379888 | 2              | 3           | 4.406 |
| 40      | YBX1              | P67809   | YBX1 Nuclease-sensitive element-binding protein                           | ENSP00000361626 | 2              | 2           | 4.354 |
| 41      | RPL21P19          | P46778   | RPL21P19;RPL21;RPL21P16 60S ribosomal protein L21                         | ENSP00000346027 | 2              | 3           | 3.614 |
| 42      | RPL8              | P62917   | RPL8 60S ribosomal protein L8                                             | ENSP00000262584 | 2              | 2           | 3.54  |
| 43      | RPA1              | P27694   | RPA1 Replication protein A 70 kDa DNA-binding subunit                     | ENSP00000254719 | 2              | 2           | 3.488 |
| 44      | RPL15             | P61313   | RPL15 60S ribosomal protein L15                                           | ENSP00000309334 | 2              | 2           | 3.345 |
| 45      | RPL13A            | P40429   | RPL13A 60S ribosomal protein L13A                                         | ENSP00000270634 | 2              | 2           | 3.325 |
| 46      | PPM1G             | O15355   | PPM1G Protein phosphatase 1G                                              | ENSP00000264714 | 2              | 2           | 3.17  |
| 47      | RPL5              | P46777   | RPL5 60S ribosomal protein L5                                             | ENSP00000359345 | 2              | 2           | 3.163 |
| 48      | IMPDH2            | P12268   | IMPDH2 Inosine-5'-monophosphate dehydrogenase 2                           | ENSP00000321584 | 2              | 2           | 3.141 |
| 49      | HSPA7             | P48741   | HSPA7 Putative heat shock 70 kDa protein                                  |                 | 2              | 3           | 3.131 |
| 50      | ACTB              | P60709   | ACTB Actin, cytoplasmic                                                   | ENSP00000349960 | 2              | 2           | 3.094 |
| 51      | TUBB2C            | P68371   | TUBB2C Tubulin beta-2C chain                                              | ENSP00000341289 | 2              | 2           | 3.078 |
| 52      | ACTA2             | P62736   | ACTA2 Actin, aortic smooth muscle                                         | ENSP00000224784 | 2              | 2           | 3.064 |
| 53      | SF3B3             | Q15393-1 | SF3B3 Isoform 1 of Splicing factor 3B subunit                             | ENSP00000305790 | 2              | 2           | 2.945 |
| 54      | RPS9              | P46781   | RPS9 40S ribosomal protein S9                                             | ENSP00000302896 | 2              | 2           | 2.699 |
| 55      | IPI:IPI00069693.4 |          | Putative uncharacterized protein RPL14P                                   | ENSP00000350479 | 2              | 2           | 2.694 |
| 56      | RPL7AP27          |          | RPL7AP27 similar to ribosomal protein L7                                  |                 | 2              | 2           | 2.671 |
| 57      | FLNA              | P21333-2 | FLNA Isoform 2 of Filamin-A                                               | ENSP00000353467 | 2              | 2           | 2.658 |
| 58      | HIST1H1B          | P16401   | HIST1H1B Histone H1.B                                                     | ENSP00000330074 | 2              | 2           | 2.476 |

|    |                   |          |                                                                                                                                        |                 |   |   |       |
|----|-------------------|----------|----------------------------------------------------------------------------------------------------------------------------------------|-----------------|---|---|-------|
| 59 | HNRNPH1           | P31943   | HNRNPH1 Heterogeneous nuclear ribonucleoprotein                                                                                        | ENSP00000349168 | 1 | 1 | 4.885 |
| 60 | SET               | Q01105-1 | SET Isoform 1 of Protein SET                                                                                                           | ENSP00000361777 | 1 | 1 | 4.739 |
| 61 | CSDA              | P16989-1 | CSDA Isoform 1 of DNA-binding protein                                                                                                  | ENSP00000228251 | 1 | 1 | 4.7   |
| 62 | CALML5            | Q9NZT1   | CALML5 Calmodulin-like protein                                                                                                         | ENSP00000369689 | 1 | 1 | 4.632 |
| 63 | ACTBL2            | Q562R1   | ACTBL2 Beta-actin-like protein                                                                                                         | ENSP00000306469 | 1 | 1 | 4.335 |
| 64 | GRWD1             | Q9BQ67   | GRWD1 Glutamate-rich WD repeat-containing protein                                                                                      | ENSP00000253237 | 1 | 1 | 4.242 |
| 65 | RPL29P30          |          | RPL29P30 similar to hCG1641491 isoform                                                                                                 |                 | 1 | 1 | 4.203 |
| 66 | DDX24             | Q9GZR7   | DDX24 ATP-dependent RNA helicase DDX24                                                                                                 | ENSP00000328690 | 1 | 1 | 3.99  |
| 67 | HNRNPF            | P52597   | HNRNPF Heterogeneous nuclear ribonucleoprotein                                                                                         | ENSP00000338477 | 1 | 1 | 3.655 |
| 68 | IPI:IP100384397.1 |          | Myosin-reactive immunoglobulin light chain variable region (Fragment)                                                                  |                 | 1 | 1 | 3.508 |
| 69 | SQSTM1            | Q13501-1 | SQSTM1 Isoform 1 of Sequestosome-1                                                                                                     | ENSP00000374455 | 1 | 1 | 3.42  |
| 70 | TUBA4A            | P68366   | TUBA4A Tubulin alpha-4A chain                                                                                                          | ENSP00000248437 | 1 | 1 | 3.386 |
| 71 | BMS1              | Q14692   | BMS1 Ribosome biogenesis protein BMS1 homolog                                                                                          | ENSP00000363642 | 1 | 1 | 3.101 |
| 72 | BXDC2             | Q8TDN6   | BXDC2 Brix domain-containing protein                                                                                                   | ENSP00000338862 | 1 | 1 | 2.996 |
| 73 | DHX15             | O43143   | DHX15 Putative pre-mRNA-splicing factor ATP-dependent RNA helicase DHX15                                                               | ENSP00000336741 | 1 | 1 | 2.798 |
| 74 | DNAJC9            |          | DNAJC9 RcDNAJ9 (Fragment)                                                                                                              |                 | 1 | 1 | 2.784 |
| 75 | PWP1              | Q13610   | PWP1 Periodic tryptophan protein 1 homolog                                                                                             | ENSP00000258531 | 1 | 1 | 2.743 |
| 76 | NOL6              | Q9H6R4-1 | NOL6 Isoform 1 of Nucleolar protein                                                                                                    | ENSP00000297990 | 1 | 1 | 2.68  |
| 77 | DHX30             | Q7L2E3-1 | DHX30 Isoform 1 of Putative ATP-dependent RNA helicase DHX3                                                                            | ENSP00000343442 | 1 | 1 | 2.552 |
| 78 | HIST1H4J          | P62805   | HIST1H4J;HIST1H4E;HIST1H4H;HIST1H4K;HIST2H4A;HIST1H4D;HIST1H4F;HIST2H4B;HIST1H4C;HIST1H4B;HIST1H4I;HIST1H4L;HIST1H4A;HIST4H4 Histone H | ENSP00000289352 | 1 | 1 | 2.551 |
| 79 | HIST2H2BE         | Q16778   | HIST2H2BE Histone H2B type 2-H                                                                                                         | ENSP00000336417 | 6 | 7 | 2.742 |
| 80 | HIST1H4J          | P62805   | HIST1H4J;HIST1H4E;HIST1H4H;HIST1H4K;HIST2H4A;HIST1H4D;HIST1H4F;HIST2H4B;HIST1H4C;HIST1H4B;HIST1H4I;HIST1H4L;HIST1H4A;HIST4H4 Histone H | ENSP00000289352 | 5 | 7 | 2.803 |
| 81 | RPL12             | P30050-1 | RPL12 Isoform 1 of 60S ribosomal protein L12                                                                                           | ENSP00000354739 | 5 | 5 | 2.784 |
| 82 | RPL26L1           | Q9UNX3   | RPL26L1 60S ribosomal protein L26-like                                                                                                 | ENSP00000265100 | 4 | 5 | 2.426 |
| 83 | DEK               | P35659   | DEK Protein DEK                                                                                                                        | ENSP00000244776 | 3 | 3 | 3.748 |
| 84 | SSBP1             | Q04837   | SSBP1 Single-stranded DNA-binding protein, mitochondria                                                                                | ENSP00000265304 | 3 | 4 | 3.045 |
| 85 | RPL28             | P46779   | RPL28 60S ribosomal protein L28                                                                                                        | ENSP00000342787 | 3 | 4 | 2.429 |
| 86 | RPLP2             | P05387   | RPLP2 60S acidic ribosomal protein P2                                                                                                  | ENSP00000322419 | 2 | 3 | 3.584 |
| 87 | RPL30             | P62888   | RPL30 60S ribosomal protein L30                                                                                                        | ENSP00000287038 | 2 | 3 | 2.515 |
| 88 | RPL34             | P49207   | RPL34 60S ribosomal protein L34                                                                                                        | ENSP00000378160 | 2 | 2 | 2.476 |
| 89 | HBB               | P68871   | HBB Hemoglobin subunit beta                                                                                                            | ENSP00000333994 | 1 | 1 | 3.838 |
| 90 | CALML5            | Q9NZT1   | CALML5 Calmodulin-like protein                                                                                                         | ENSP00000369689 | 1 | 1 | 3.775 |
| 91 | SRP14             | P37108   | SRP14 Signal recognition particle 14 kDa protein                                                                                       | ENSP00000267884 | 1 | 1 | 3.691 |
| 92 | HIST1H2AH         | Q96KK5   | HIST1H2AH;HIST1H2AL;HIST1H2AG;HIST1H2AJ;HIST1H2AK;HIST1H2AI;HIST1H2AM Histone H2A type 1-                                              | ENSP00000366679 | 1 | 1 | 3.522 |
| 93 | H2AFV             | Q71UI9   | H2AFV Histone H2A.F                                                                                                                    | ENSP00000308405 | 1 | 1 | 3.274 |
| 94 | RBBP6             | Q7Z6E9-1 | RBBP6 Isoform 1 of Retinoblastoma-binding protein                                                                                      | ENSP00000317872 | 1 | 1 | 3.181 |
| 95 | RPL27A            | P46776   | RPL27A 60S ribosomal protein L27A                                                                                                      | ENSP00000346015 | 1 | 1 | 3.118 |

|     |           |        |                                                                                                       |                 |   |   |       |
|-----|-----------|--------|-------------------------------------------------------------------------------------------------------|-----------------|---|---|-------|
| 96  | RPS13     | P62277 | RPS13 40S ribosomal protein S13                                                                       | ENSP00000228140 | 1 | 1 | 2.966 |
| 97  | ACTBL2    | Q562R1 | ACTBL2 Beta-actin-like protein                                                                        | ENSP00000306469 | 1 | 1 | 2.918 |
| 98  | LGALS7    | P47929 | LGALS7;LGALS7B Galectin-7                                                                             | ENSP00000313571 | 1 | 1 | 2.891 |
| 99  | RPL35     | P42766 | RPL35 60S ribosomal protein L35                                                                       | ENSP00000259469 | 1 | 1 | 2.834 |
| 100 | IGHA1     |        | IGHA1 SNC66 protein                                                                                   |                 | 1 | 1 | 2.772 |
| 101 | HIST2H3D  | Q71DI3 | HIST2H3D;HIST2H3C;HIST2H3A Histone H3.D                                                               | ENSP00000333277 | 1 | 1 | 2.721 |
| 102 | ANXA2P2   | A6NMY6 | ANXA2P2 Putative annexin A2-like protein                                                              |                 | 1 | 1 | 2.639 |
| 103 | HIST1H2AB | P04908 | HIST1H2AB;HIST1H2AE;HIST1H2AL;HIST1H2AG;HIST1H2AJ;HIST1H2AK;HIST1H2AI;HIST1H2AM Histone H2A type 1-B/ | ENSP00000259791 | 1 | 1 | 2.605 |
| 104 | RPL27     | P61353 | RPL27 60S ribosomal protein L27                                                                       | ENSP00000253788 | 1 | 1 | 2.451 |
| 105 | RPL35A    | P18077 | RPL35A 60S ribosomal protein L35A                                                                     | ENSP00000330165 | 1 | 1 | 2.27  |
