# Supplementary material
Source: PubMed Central journal article supplement (PMC5730476)
Supplement: NIHMS916645-supplement-Supp6.pdf [file NIHMS916645-supplement-Supp6.pdf]

| Unique to Untreated HF-DEK | Common to both untreated and HU samples | Unique to HU treated HF-DEK |
|----------------------------|-----------------------------------------|-----------------------------|
| EEF1A2                     | ANXA2P2                                 | ACTA2                       |
| EIF5A                      | C1QBP                                   | ACTB                        |
| HIST1H2BL                  | CSDA                                    | ACTBL2                      |
| HNRNPK                     | CSNK2A1                                 | BMS1                        |
| NAP1L1                     | CSNK2A2                                 | BXDC2                       |
| PURA                       | DDX21                                   | CALML5                      |
| RPL31                      | EBNA1BP2                                | DDX24                       |
| RPL36                      | GRWD1                                   | DHX15                       |
| RPS18                      | H2AFV                                   | DHX30                       |
| RPS19                      | HIST1H1B                                | DNAJC9                      |
| RPS24                      | HIST1H1C                                | FLNA                        |
| RPS6                       | HIST1H2AB                               | HBB                         |
| RRP15                      | HIST1H2AH                               | HNRNPH1                     |
| SFPQ                       | HIST1H4J                                | HNRNPM                      |
| TUBB                       | HIST2H2BE                               | HNRNPU                      |
| TXN                        | HIST2H3D                                | HSPA1L                      |
| WDR12                      | HNRNPF                                  | IGHA1                       |
|                            | HSPA1A                                  | KIF11                       |
|                            | HSPA5                                   | LGALS7                      |
|                            | HSPA7                                   | MYH9                        |
|                            | HSPA8                                   | NOL6                        |
|                            | HSPA9                                   | NOP2                        |
|                            | IMPDH2                                  | PWP1                        |
|                            | IPI:IPI00069693.4                       | RBBP6                       |
|                            | IPI:IPI00384397.1                       | RPA1                        |
|                            | LY6G5B                                  | RPL23A                      |
|                            | NPM1                                    | RPL35                       |
|                            | PPM1G                                   | SF3B3                       |
|                            | RBM28                                   | SQSTM1                      |
|                            | RPL10A                                  | STK38                       |
|                            | RPL10AP3                                | TUBB2C                      |
|                            | RPL11                                   | XRCC5                       |
|                            | RPL12                                   | XRCC6                       |
|                            | RPL13                                   |                             |
|                            | RPL13A                                  |                             |
|                            | RPL13P12                                |                             |
|                            | RPL15                                   |                             |
|                            | RPL18                                   |                             |
|                            | RPL19                                   |                             |
|                            | RPL21P19                                |                             |
|                            | RPL26L1                                 |                             |
|                            | RPL27                                   |                             |
|                            | RPL27A                                  |                             |
|                            | RPL28                                   |                             |

|          |
|----------|
| RPL29P30 |
| RPL3     |
| RPL30    |
| RPL34    |
| RPL35A   |
| RPL4     |
| RPL5     |
| RPL6     |
| RPL7     |
| RPL7A    |
| RPL7AP27 |
| RPL8     |
| RPLP0    |
| RPLP2    |
| RPS13    |
| RPS8     |
| RPS9     |
| SET      |
| SRP14    |
| SSBP1    |
| TUBA1C   |
| TUBA4A   |
| YBX1     |
