# Supplementary material
Source: PubMed Central journal article supplement (PMC5730476)
Supplement: NIHMS916645-supplement-Supp7.pdf [file NIHMS916645-supplement-Supp7.pdf]

| Rank | Pathway Name                                                      | q-value<br>FDR B&H | Bonferroni |
|------|-------------------------------------------------------------------|--------------------|------------|
| 1    | Spliceosome                                                       | 1.07E-03           | 2.16E-03   |
| 2    | mRNA processing                                                   | 1.07E-03           | 2.60E-03   |
| 3    | Cytoskeletal regulation by Rho GTPase                             | 1.07E-03           | 3.74E-03   |
| 4    | Double-Strand Break Repair                                        | 1.07E-03           | 4.26E-03   |
| 5    | Nicotinic acetylcholine receptor signaling pathway                | 2.04E-03           | 1.12E-02   |
| 6    | Processing of DNA ends prior to end rejoining                     | 2.04E-03           | 1.22E-02   |
| 7    | Non-homologous end joining                                        | 2.56E-03           | 1.83E-02   |
| 8    | mRNA Splicing - Major Pathway                                     | 2.56E-03           | 2.52E-02   |
| 9    | mRNA Splicing                                                     | 2.56E-03           | 2.52E-02   |
| 10   | Nonhomologous End-joining (NHEJ)                                  | 2.56E-03           | 2.56E-02   |
| 11   | 2-LTR circle formation                                            | 3.10E-03           | 3.41E-02   |
| 12   | Processing of Capped Intron-Containing Pre-mRNA                   | 5.40E-03           | 6.49E-02   |
| 13   | Integration of provirus                                           | 6.74E-03           | 9.44E-02   |
| 14   | Non-homologous end-joining                                        | 6.74E-03           | 9.44E-02   |
| 15   | IRF3-mediated induction of type I IFN                             | 7.33E-03           | 1.10E-01   |
| 16   | STING mediated induction of host immune responses                 | 1.02E-02           | 1.64E-01   |
| 17   | Telomeres, Telomerase, Cellular Aging, and Immortality            | 1.02E-02           | 1.84E-01   |
| 18   | Early Phase of HIV Life Cycle                                     | 1.02E-02           | 1.84E-01   |
| 19   | Inflammation mediated by chemokine and cytokine signaling pathway | 1.02E-02           | 1.94E-01   |
| 20   | Salmonella infection                                              | 1.12E-02           | 2.25E-01   |
