# Supplementary material
Source: PubMed Central journal article supplement (PMC5730476)
Supplement: NIHMS916645-supplement-Supp8.pdf [file NIHMS916645-supplement-Supp8.pdf]

| Position | Code | Kinase                 | Peptide        | Score  | Cutoff |
|----------|------|------------------------|----------------|--------|--------|
| 2        | S    | CK1/VRK/VRK2           | *****MSASAPAAE | 26.25  | 5.225  |
| 2        | S    | Other/PLK              | *****MSASAPAAE | 25.136 | 10.591 |
| 2        | S    | CK1                    | *****MSASAPAAE | 18.542 | 7.074  |
| 2        | S    | CAMK/CAMKL/QIK/SIK1    | *****MSASAPAAE | 12.625 | 4.074  |
| 2        | S    | STE/STE20/KHS          | *****MSASAPAAE | 10.5   | 8.4    |
| 2        | S    | AGC/GRK/GRK/GRK        | *****MSASAPAAE | 9.5    | 9.35   |
| 2        | S    | Other/PLK/PLK2         | *****MSASAPAAE | 8.535  | 6.617  |
| 2        | S    | CAMK/PHK               | *****MSASAPAAE | 8.385  | 3.785  |
| 2        | S    | CMGC/CDK/CDK4          | *****MSASAPAAE | 7.263  | 6.215  |
| 2        | S    | CK1/VRK                | *****MSASAPAAE | 7      | 0.977  |
| 2        | S    | Other/WEE              | *****MSASAPAAE | 6.667  | 5.583  |
| 2        | S    | Other/WEE/Myt1         | *****MSASAPAAE | 6.667  | 5.583  |
| 2        | S    | Other/WEE/Myt1/PKMYT1  | *****MSASAPAAE | 6.667  | 5.583  |
| 2        | S    | TKL/STKR/STKR1/TGFbR1  | *****MSASAPAAE | 6.333  | 5.333  |
| 2        | S    | AGC/GRK/BARK/BARK1     | *****MSASAPAAE | 6.143  | 5.269  |
| 2        | S    | TKL/STKR               | *****MSASAPAAE | 6.125  | 5.609  |
| 2        | S    | TKL/STKR/STKR1/BMPR1B  | *****MSASAPAAE | 6      | 5.158  |
| 2        | S    | AGC/RSK/MSK            | *****MSASAPAAE | 5.778  | 4.025  |
| 2        | S    | Other/ULK/ULK/ULK3     | *****MSASAPAAE | 5.75   | 3.15   |
| 2        | S    | CMGC/CDK/CDK4/CDK4     | *****MSASAPAAE | 4.941  | 4.74   |
| 2        | S    | CMGC/MAPK/p38/MAPK13   | *****MSASAPAAE | 4.824  | 4.706  |
| 2        | S    | TKL/MLK/MLK/MLK1       | *****MSASAPAAE | 4.667  | 2.6    |
| 2        | S    | CAMK/CAMK1/CAMK4       | *****MSASAPAAE | 3.875  | 2.206  |
| 2        | S    | TKL/MLK/MLK            | *****MSASAPAAE | 3.545  | 1.5    |
| 2        | S    | AGC/RSK/RSKp70/RPS6KB1 | *****MSASAPAAE | 3.4    | 2.548  |
| 2        | S    | AGC/RSK/RSKp90/RPS6KA1 | *****MSASAPAAE | 3.188  | 2.462  |
| 2        | S    | STE/STE20/PAKA/PAK2    | *****MSASAPAAE | 2.906  | 2.05   |
| 2        | S    | CAMK/PIM/PIM3          | *****MSASAPAAE | 2.5    | 2.11   |
| 2        | S    | CAMK/PKD/PRKD1         | *****MSASAPAAE | 2.269  | 1.5    |
| 2        | S    | AGC/PDK1/PDPK1         | *****MSASAPAAE | 1.796  | 1.51   |
| 2        | S    | AGC/PKC                | *****MSASAPAAE | 1.464  | 1.416  |

| Position | Code | Kinase                    | Peptide         | Score  | Cutoff |
|----------|------|---------------------------|-----------------|--------|--------|
| 4        | S    | CK1/VRK/VRK2              | ****MSASAPAAEGE | 22.75  | 5.225  |
| 4        | S    | Other/PLK                 | ****MSASAPAAEGE | 18.117 | 10.591 |
| 4        | S    | Other/CDC7                | ****MSASAPAAEGE | 15.333 | 11.933 |
| 4        | S    | Other/CDC7/CDC7           | ****MSASAPAAEGE | 15.333 | 11.933 |
| 4        | S    | Other/PLK/PLK2            | ****MSASAPAAEGE | 12.419 | 6.617  |
| 4        | S    | CAMK/CAMKL/AMPK/AMPKA2    | ****MSASAPAAEGE | 12.25  | 9.162  |
| 4        | S    | CAMK/CAMKL/QIK/SIK1       | ****MSASAPAAEGE | 11.688 | 4.074  |
| 4        | S    | CAMK/RAD53/DUN1           | ****MSASAPAAEGE | 11     | 7.333  |
| 4        | S    | CAMK/CAMKL/AMPK/AMPKA1    | ****MSASAPAAEGE | 10.75  | 7.125  |
| 4        | S    | CAMK/MAPKAPK              | ****MSASAPAAEGE | 9.948  | 8.972  |
| 4        | S    | CK1/CK1/CK1-D/CK1e        | ****MSASAPAAEGE | 9.706  | 6.526  |
| 4        | S    | CK1                       | ****MSASAPAAEGE | 8.312  | 7.074  |
| 4        | S    | CAMK/PHK                  | ****MSASAPAAEGE | 7.115  | 3.785  |
| 4        | S    | Other/PLK/PLK2/PLK2       | ****MSASAPAAEGE | 6.72   | 6.272  |
| 4        | S    | Atypical/Alpha/ChaK/TRPM7 | ****MSASAPAAEGE | 6.714  | 6.629  |
| 4        | S    | CK1/CK1                   | ****MSASAPAAEGE | 6.154  | 3.998  |
| 4        | S    | TKL/RAF                   | ****MSASAPAAEGE | 6      | 2.289  |
| 4        | S    | STE/STE20/KHS/HPK1        | ****MSASAPAAEGE | 6      | 5.683  |
| 4        | S    | Other/ULK/ULK/ULK3        | ****MSASAPAAEGE | 5.75   | 3.15   |
| 4        | S    | CK1/VRK                   | ****MSASAPAAEGE | 5.5    | 0.977  |
| 4        | S    | CAMK/CAMK1/CAMK4          | ****MSASAPAAEGE | 5.417  | 2.206  |
| 4        | S    | CMGC/CDK/CDK4/CDK4        | ****MSASAPAAEGE | 5.235  | 4.74   |
| 4        | S    | AGC/RSK/MSK               | ****MSASAPAAEGE | 5.185  | 4.025  |
| 4        | S    | TKL/RAF/RAF               | ****MSASAPAAEGE | 4.8    | 3.682  |
| 4        | S    | AGC/PKC/PKCd/PRKCQ        | ****MSASAPAAEGE | 4.318  | 3.963  |
| 4        | S    | AGC/RSK/RSKp70/RPS6KB1    | ****MSASAPAAEGE | 3.8    | 2.548  |
| 4        | S    | CAMK/PKD                  | ****MSASAPAAEGE | 3.773  | 3.191  |
| 4        | S    | CK1/VRK/VRK1              | ****MSASAPAAEGE | 3.4    | 3.159  |
| 4        | S    | TKL/RAF/RAF/RAF1          | ****MSASAPAAEGE | 2.778  | 2.47   |
| 4        | S    | CAMK/CAMKL/AMPK           | ****MSASAPAAEGE | 2.389  | 1.777  |
| 4        | S    | CAMK/PKD/PRKD1            | ****MSASAPAAEGE | 1.962  | 1.5    |
| 4        | S    | AGC/PDK1/PDPK1            | ****MSASAPAAEGE | 1.776  | 1.51   |

| Position | Code | Kinase                  | Peptide         | Score  | Cutoff |
|----------|------|-------------------------|-----------------|--------|--------|
| 13       | T    | CMGC/MAPK/JNK/JNK2      | PAAEGEGTPTQPASE | 33     | 31.509 |
| 13       | T    | AGC/GRK/GRK/GRK         | PAAEGEGTPTQPASE | 23.722 | 9.35   |
| 13       | T    | CMGC/CDK/CDC2/CDK1      | PAAEGEGTPTQPASE | 20.097 | 8.98   |
| 13       | T    | CMGC/CDK/CDK5/CDK5      | PAAEGEGTPTQPASE | 19.235 | 15.952 |
| 13       | T    | CMGC/CDK/CDK5           | PAAEGEGTPTQPASE | 19.101 | 12.789 |
| 13       | T    | CK1/VRK/VRK2            | PAAEGEGTPTQPASE | 16.25  | 5.225  |
| 13       | T    | CMGC/MAPK/p38           | PAAEGEGTPTQPASE | 15.393 | 7.633  |
| 13       | T    | CMGC/CDK/CDK4           | PAAEGEGTPTQPASE | 15.105 | 6.215  |
| 13       | T    | CMGC/MAPK/ERK/Erk2      | PAAEGEGTPTQPASE | 14.819 | 10.451 |
| 13       | T    | Atypical/PIKK/FRAP      | PAAEGEGTPTQPASE | 14.722 | 11.395 |
| 13       | T    | Other/PLK               | PAAEGEGTPTQPASE | 14.37  | 10.591 |
| 13       | T    | CMGC/DYRK/DYRK1/DYRK1B  | PAAEGEGTPTQPASE | 12.167 | 7.575  |
| 13       | T    | Other/Other-Unique/KIS  | PAAEGEGTPTQPASE | 10.5   | 7.667  |
| 13       | T    | CMGC/DYRK               | PAAEGEGTPTQPASE | 10.431 | 6.791  |
| 13       | T    | CMGC/CDK/CDC2           | PAAEGEGTPTQPASE | 10.205 | 8.778  |
| 13       | T    | CMGC/MAPK               | PAAEGEGTPTQPASE | 10.158 | 9.723  |
| 13       | T    | CMGC/MAPK/ERK/Erk5      | PAAEGEGTPTQPASE | 9.294  | 7.382  |
| 13       | T    | CMGC/CDK/CCRK/CDK20     | PAAEGEGTPTQPASE | 9      | 8.506  |
| 13       | T    | CMGC/CDK/CDK4/CDK6      | PAAEGEGTPTQPASE | 8.667  | 6.758  |
| 13       | T    | CMGC/MAPK/p38/MAPK11    | PAAEGEGTPTQPASE | 8.222  | 8.192  |
| 13       | T    | CK1/TTBK                | PAAEGEGTPTQPASE | 8.2    | 6.136  |
| 13       | T    | Other/IKK               | PAAEGEGTPTQPASE | 7.418  | 6.349  |
| 13       | T    | CMGC/CDK/CCRK           | PAAEGEGTPTQPASE | 7.125  | 7.094  |
| 13       | T    | CMGC/MAPK/p38/MAPK13    | PAAEGEGTPTQPASE | 7.118  | 4.706  |
| 13       | T    | CMGC/DYRK/DYRK1/DYRK1A  | PAAEGEGTPTQPASE | 6.182  | 6.152  |
| 13       | T    | CMGC/GSK/GSK3A          | PAAEGEGTPTQPASE | 6      | 4.488  |
| 13       | T    | CMGC/DYRK/DYRK1         | PAAEGEGTPTQPASE | 5.889  | 4.562  |
| 13       | T    | Atypical/PIKK/FRAP/MTOR | PAAEGEGTPTQPASE | 5.552  | 4.258  |
| 13       | T    | CMGC/MAPK/p38/MAPK14    | PAAEGEGTPTQPASE | 5.169  | 3.342  |
| 13       | T    | AGC/GRK/GRK             | PAAEGEGTPTQPASE | 4.988  | 3.858  |
| 13       | T    | AGC/PDK1                | PAAEGEGTPTQPASE | 4.944  | 2.39   |
| 13       | T    | CMGC/MAPK/JNK/JNK1      | PAAEGEGTPTQPASE | 4.712  | 3.02   |
| 13       | T    | AGC/PDK1/PDPK1          | PAAEGEGTPTQPASE | 4.673  | 1.51   |
| 13       | T    | AGC/DMPK/GEK/MRCKa      | PAAEGEGTPTQPASE | 4.4    | 4.22   |
| 13       | T    | CMGC/DYRK/HIPK          | PAAEGEGTPTQPASE | 4.303  | 2.013  |
| 13       | T    | CK1/CK1                 | PAAEGEGTPTQPASE | 4.215  | 3.998  |
| 13       | T    | AGC/GRK/GRK/GPRK5       | PAAEGEGTPTQPASE | 4      | 3.442  |
| 13       | T    | CMGC                    | PAAEGEGTPTQPASE | 3.793  | 2.953  |
| 13       | T    | CMGC/CDK/CDK2/CDK3      | PAAEGEGTPTQPASE | 3.6    | 3.34   |
| 13       | T    | CMGC/MAPK/ERK           | PAAEGEGTPTQPASE | 3.567  | 2.734  |
| 13       | T    | CMGC/GSK                | PAAEGEGTPTQPASE | 3.183  | 1.884  |
| 13       | T    | CMGC/DYRK/HIPK/HIPK2    | PAAEGEGTPTQPASE | 2.793  | 1.841  |
| 13       | T    | CK1/VRK                 | PAAEGEGTPTQPASE | 1.3    | 0.977  |

| Position | Code | Kinase             | Peptide         | Score | Cutoff |
|----------|------|--------------------|-----------------|-------|--------|
| 342      | T    | STE/STE20/MST/MST1 | SANLEEVTMKQICKK | 21.29 | 9.234  |
| 342      | T    | CK1                | SANLEEVTMKQICKK | 8.854 | 7.074  |
| 342      | T    | AGC/PKC/PKCh/PRKCH | SANLEEVTMKQICKK | 5.9   | 3.79   |
| 342      | T    | CK1/VRK/VRK2       | SANLEEVTMKQICKK | 5.25  | 5.225  |
| 342      | T    | STE/STE7/MEK3      | SANLEEVTMKQICKK | 2.538 | 2.053  |
| 342      | T    | CAMK/DAPK          | SANLEEVTMKQICKK | 2.317 | 1.753  |
